# Supplementary material for: Deoxysphingolipids and ether-linked diacylglycerols accumulate in the tissues of aged mice
Source: Cell Biosci. 2019 Aug 5;9:61. doi: 10.1186/s13578-019-0324-9 (PMC6683348; doi:10.1186/s13578-019-0324-9)
Supplement: Supplementary file 3 — Additional file 3. A list of identified metabolites and lipids in the cerebral cortex, liver, femoral muscle, and epididymal fat in aged and young mice. Retention time (RT), observed mass (ObsMass), coefficient of variation of mixQC (CV), and ion from lipidomics analysis (Ion) and database identifiers (KEGG and HMDB) for metabolomics analysis are also included in table. Abbreviations: MG, monoacyl; DG, diacylglycerol; TG, triacylglycerol; aa, di-acyl; aaa, tri-acyl; aaaa, tetra-acyl; ae, acyl and ether; phosphatidylcholine, PC; lysophosphatidylcholine, LPC; phosphatidylethanolamine, PE; lysophosphatidylethanolamine, LPE; phosphatidylserine, PS; lysophosphatidylserine, LPS; phosphatidylglycerol, PG; lysophosphatidylglycerol, LPG; phosphatidic acid, PA; lysophosphatidic acid, LPA; phosphatidylinositol, PI; lysophosphatidylinositol, LPI; CL, cardiolipins; Cer, ceramides; SM, sphingomyelins. [file 13578_2019_324_MOESM3_ESM.xlsx]

## Sheet: Brain
	Molecule		Statistics		Mean (area)		Young					Aged					mixQC						Molecule information
Platform	Group	Name	Fold change	P-value (Welch's t-test)	young	aged	Brain_51	Brain_53	Brain_55	Brain_57	Brain_59	Brain_52	Brain_54	Brain_56	Brain_58	Brain_60	Brain_QC01	Brain_QC02	Brain_QC03	Brain_QC04	Brain_QC05	Brain_QC06	CV	KEGG/HMDB	Ion	RT	ObsMass
IonPair	Purine pathway	ATP	0.921413	0.358601	3.07694e+06	2.83514e+06	3.16447e+06	2.60971e+06	2.56473e+06	3.72525e+06	3.32055e+06	2.6325e+06	2.82712e+06	3.03494e+06	2.59503e+06	3.08609e+06	2.77296e+06	2.9139e+06	2.30329e+06	3.21831e+06	2.35086e+06	2.90456e+06	0.129284	C00002		4.21
IonPair	Nicotinate and nicotinamide pathway	NAD+	1.01229	0.852207	2.59074e+07	2.62258e+07	2.29653e+07	2.54953e+07	2.61922e+07	2.77259e+07	2.71583e+07	2.77863e+07	2.67048e+07	2.11891e+07	2.96746e+07	2.5774e+07	3.02331e+07	2.38768e+07	2.4173e+07	2.20931e+07	2.34525e+07	2.4452e+07	0.114426	C00003		6.34
IonPair	Nicotinate and nicotinamide pathway	NADH	0.947404	0.734491	213251	202035	196376	265453	191273	259286	153868	174531	134313	277132	217494	206706	220107	164920	223562	121092	202443	172569	0.212603	C00004		8.35
IonPair	Nicotinate and nicotinamide pathway	NADP+	0.972728	0.628454	480568	467462	425298	514319	513807	452336	497080	462053	536185	473509	430989	434574	429267	448617	447128	436068	444591	457912	0.0226376	C00006		6.45
IonPair	AcylCoA	CoA	1.50549	0.201593	23018.2	34653.8	25618.3	0	44870	28468.8	16134	40161.2	29439.4	37631.2	40539.2	25498	21623.6	32145.7	29261.5	32225.5	23731.4	31441.3	0.16238	C00010		10.13
IonPair	Pyrimidine pathway	UDP	0.897594	0.286893	202939	182157	219484	162241	175654	247533	209785	170481	202696	163118	167858	206632	194160	208632	233933	196524	216564	188985	0.0815348	C00015		1.85
IonPair	Riboflavin pathway	FAD	1.09599	0.359558	435752	477580	493061	437803	483690	411907	352302	396130	402953	484540	561919	542358	349256	455642	393594	489465	417404	472636	0.123217	C00016		8.66
IonPair	Cys/Met pathway	S-Adenosyl-methionine(SAM)	1.02665	0.835841	756261	776418	983391	764247	562742	647779	823143	615118	884959	722594	941927	717494	699582	517089	885813	581175	567876	768496	0.209861	C00019		1.69
IonPair	Purine pathway	AMP	0.974503	0.48821	9.83527e+07	9.5845e+07	9.87282e+07	1.01924e+08	1.01311e+08	8.87483e+07	1.01052e+08	9.987e+07	9.3e+07	9.4328e+07	8.92897e+07	1.02737e+08	9.94726e+07	9.79519e+07	1.05276e+08	9.72898e+07	9.2294e+07	9.21473e+07	0.0503582	C00020		1.85
IonPair	Cys/Met pathway	S-adenosyl-homocysteine	0.904362	0.441826	143327	129619	141118	202327	130066	129209	113915	122753	144518	113897	124964	141966	300089	326441	323876	319641	285633	258433	0.0882025	C00021		8.6
IonPair	AcylCoA	AcylCoA(C2)	0.891955	0.68696	276984	247057	319564	289275	308590	211377	256115	399414	230830	398097	136010	70936	54402.2	79532.9	105917	55571.1	98439.3	92670.3	0.271159	C00024		10.2
IonPair	Glucose pathway	UDP-glucose	0.930076	0.141538	5.50478e+06	5.11986e+06	5.70537e+06	5.08863e+06	5.73398e+06	5.16115e+06	5.83475e+06	5.38899e+06	5.65193e+06	4.87442e+06	4.68749e+06	4.99647e+06	4.3118e+06	4.94039e+06	5.04445e+06	4.59505e+06	4.50329e+06	4.56722e+06	0.0595458	C00029		8.63
IonPair	Purine pathway	GDP	0.841937	0.428394	63159	53175.9	88454.7	43322.9	71424.7	39229.8	73362.9	27335.4	70337.2	63141.7	50967	54098.1	59092.6	64471.1	67079.5	57479.5	53029.6	48317.6	0.119905	C00035		7.54
IonPair	TCA cycle	Oxaloacetic acid	1.03412	0.740563	134746	139344	140684	130172	159054	123188	120633	111075	120383	150971	175035	139257	120295	145979	139016	108743	102841	133632	0.137938	C00036		7.9
IonPair	Nucleotide sugar pathway	UDP-N-acetyl-glucosamine	0.796097	0.00125821	1.44344e+06	1.14912e+06	1.43922e+06	1.36346e+06	1.54208e+06	1.3805e+06	1.49194e+06	1.21055e+06	1.13635e+06	971631	1.20119e+06	1.22586e+06	1.19779e+06	1.12384e+06	959745	1.27901e+06	1.29555e+06	1.25698e+06	0.107288	C00043		8.62
IonPair	Glutathione pathway	Glutathione, reduced form	0.918296	0.0195722	5.17097e+07	4.74848e+07	5.06294e+07	4.87432e+07	5.05224e+07	5.30905e+07	5.5563e+07	4.69589e+07	4.63757e+07	4.66167e+07	4.88931e+07	4.85795e+07	5.24752e+07	4.91563e+07	5.56497e+07	4.85258e+07	4.68616e+07	5.03708e+07	0.0622208	C00051		1.14
IonPair	Pyrimidine pathway	CMP	0.815146	0.00622803	5.62517e+06	4.58534e+06	5.54389e+06	5.37027e+06	4.98769e+06	6.15585e+06	6.06814e+06	4.45445e+06	4.88237e+06	4.39127e+06	4.55581e+06	4.64277e+06	5.36123e+06	4.99144e+06	6.1055e+06	4.61493e+06	4.4742e+06	4.42831e+06	0.129849	C00055		1.59
IonPair	Arg/Pro pathway	Arginine	0.719826	0.077185	202310	145628	270689	211543	219532	146219	163568	147573	197495	92131.7	150469	140473	131208	166419	182407	117309	137574	215073	0.231441	C00062		6.18
IonPair	Ala/Asp/Glu pathway	Glutamine	1.14882	0.0993506	3.16877e+07	3.64035e+07	3.53403e+07	3.30698e+07	3.56736e+07	2.56109e+07	2.87438e+07	4.02724e+07	3.94704e+07	3.29072e+07	3.65929e+07	3.27744e+07	3.01538e+07	2.87622e+07	3.56728e+07	3.04837e+07	2.89994e+07	3.56984e+07	0.101504	C00064		1.02
IonPair	Vitamine	Ascorbic acid	1.11458	0.00380251	2.42236e+07	2.6999e+07	2.40084e+07	2.4349e+07	2.5599e+07	2.24846e+07	2.4677e+07	2.72178e+07	2.63507e+07	2.84586e+07	2.57364e+07	2.72316e+07	2.70179e+07	2.48992e+07	2.60828e+07	2.32987e+07	2.42661e+07	2.49912e+07	0.052376	C00072		1.85
IonPair	Pyrimidine pathway	UTP	0.811417	0.261088	106803	86661.8	100708	111175	60851.7	107008	154272	92853.2	95734.6	99666.9	72330.2	72724.1	89273.1	113896	52462.9	112876	67164.4	90579.6	0.279006	C00075		5.36
IonPair	Glucose pathway	Glucose-1-phosphate	1.04053	0.827199	256588	266987	254059	172220	330131	247764	278767	327490	232797	137661	285712	351275	257373	244379	330207	230645	257622	238794	0.138729	C00103		7.15
IonPair	Purine pathway	IDP	0.931478	0.363352	302361	281643	291188	350235	268309	318998	283074	285945	296949	255839	329854	239627	250062	328472	277154	295266	318987	330045	0.106584	C00104		7.16
IonPair	Glycolysis	Dihydroxy-acetone-phosphate	0.988987	0.844756	1.59259e+06	1.57505e+06	1.48334e+06	1.53431e+06	1.55246e+06	1.61896e+06	1.77385e+06	1.6629e+06	1.7897e+06	1.39578e+06	1.56517e+06	1.46168e+06	1.12908e+06	815402	1.10184e+06	1.0587e+06	1.04302e+06	1.08754e+06	0.109557	C00111		7.2
IonPair	Pyrimidine pathway	CDP	0.760358	0.250275	39237.1	29834.3	54131.3	38233.4	29338.1	33760.2	40722.6	25108.3	53741.9	24649	17625	28047.2	44204.9	21019	51005.6	41656.3	34341.8	42280.4	0.264415	C00112		7.11
IonPair	Gly/Ser/Thr pathway	Choline	1.11739	0.389673	3.27797e+06	3.66278e+06	3.14269e+06	4.27888e+06	3.63154e+06	2.54698e+06	2.78976e+06	3.99487e+06	3.89322e+06	3.7783e+06	4.11555e+06	2.53195e+06	2.53913e+06	2.70606e+06	4.29696e+06	2.93934e+06	2.82581e+06	3.67545e+06	0.214848	C00114		1.01
IonPair	Glycolysis	Glyceraldehyde-3-phosphate	0.884424	0.0959759	1.06518e+06	942069	988988	1.02259e+06	1.02403e+06	1.09369e+06	1.19659e+06	1.08267e+06	1.05704e+06	874058	842919	853652	674381	693151	562872	765019	721831	757512	0.106417	C00118		7.18
IonPair	Purine pathway	IMP	0.972906	0.614566	3.9383e+07	3.8316e+07	4.18232e+07	3.81154e+07	3.79169e+07	4.04896e+07	3.85699e+07	3.5138e+07	3.69026e+07	4.44013e+07	3.45799e+07	4.05581e+07	3.9448e+07	3.81423e+07	4.18028e+07	4.36401e+07	3.59314e+07	3.8809e+07	0.0690165	C00130		4.92
IonPair	His pathway	Histidine	1.41799	0.0663184	1.11833e+06	1.58578e+06	1.26958e+06	1.27021e+06	1.05345e+06	1.10721e+06	891195	1.45964e+06	1.54994e+06	1.53903e+06	2.26696e+06	1.11334e+06	1.09359e+06	1.05925e+06	1.45166e+06	788114	1.14574e+06	1.40677e+06	0.211257	C00135		5.06
IonPair	Sugar related	Inositol	1.03673	0.688403	6.91069e+06	7.1645e+06	7.83362e+06	6.48324e+06	6.15123e+06	6.39625e+06	7.68911e+06	6.49178e+06	6.52437e+06	8.84747e+06	6.2229e+06	7.736e+06	7.01824e+06	6.29926e+06	6.50292e+06	6.91234e+06	6.42736e+06	6.53525e+06	0.0430095	C00137		0.97
IonPair	Nicotinate and nicotinamide pathway	Nicotinamide	0.68888	0.00315586	218994	150860	210337	209692	245080	202513	227348	142955	131207	201561	142758	135820	205603	185621	166553	171472	242812	146820	0.181612	C00153		8.63
IonPair	Cys/Met pathway	S-Methyl-5-thioadenosine	0.903545	0.14278	680765	615101	725478	612963	705203	590954	769227	607861	583761	627522	684539	571824	770943	879200	914042	787065	714121	862135	0.0924391	C00170		1.04
IonPair	Sugar related	Cellobiose	0.828232	0.489493	11057.8	9158.41	15022.8	2534.21	11902.4	15685.7	10143.7	6688.26	10201.3	6799.15	11053.1	11050.2	12751	10911.9	12748.3	6801.71	12711.5	6800.92	0.27898	C00185		7.11
IonPair	Purine pathway	Adenosine	1.20337	0.234922	1.51249e+07	1.82009e+07	1.41001e+07	1.69198e+07	1.55012e+07	1.43523e+07	1.4751e+07	2.04193e+07	1.13263e+07	2.18767e+07	2.24957e+07	1.48864e+07	1.1695e+07	1.43633e+07	1.51773e+07	1.30181e+07	1.56294e+07	1.32502e+07	0.106498	C00212		7.22
IonPair	Taurine and hypotaurine pathway	Acetylphosphate	1.12472	0.192309	310774	349534	312294	316543	304070	270833	350132	327896	436599	309014	357238	316923	319156	308155	295521	320088	309976	345541	0.0531786	C00227		8.16
IonPair	Purine pathway	Guanine	0.832843	0.0770798	402521	335237	306360	465506	372928	424639	443172	327764	353515	358336	340302	296265	332404	458863	400599	329530	363317	424074	0.135231	C00242		7.1
IonPair	Riboflavin pathway	Riboflavin	1.02945	0.863334	99095.9	102014	106276	105171	132587	61814.8	89629.8	126662	107961	57827	111361	106259	107278	84807.8	80745.7	81200.7	102004	62906.6	0.185916	C00255		7.03
IonPair	PPP	Gluconic acid	0.977236	0.845609	65927	64426.2	65454.4	64606.1	89330.3	56952.2	53292.1	64556.7	62053.4	51004	71409.2	73107.9	59504.8	66308.4	93512	53556.7	73110	77359	0.201324	C00257		5.76
IonPair	Glyoxylate and dicarboxylate pathway	Glyceric acid	1.04258	0.790684	44634.8	46535.5	51939.8	62907.8	30992.7	33437.6	43896.2	41699	54957.9	55220.1	40558.7	40241.6	41012.1	33207.3	40911.4	40239.1	14468.6	41928.3	0.302719	C00258		7.27
IonPair	Purine pathway	Hypoxanthine	1.06851	0.489859	942658	1.00724e+06	726948	969096	869530	1.00184e+06	1.14588e+06	893503	964431	1.21857e+06	970702	989001	890510	1.15623e+06	901598	911001	920653	869143	0.113302	C00262		7.1
IonPair	Purine pathway	Inosine	1.13533	0.343933	5.53416e+06	6.28309e+06	4.69249e+06	6.41102e+06	5.52664e+06	5.14718e+06	5.89346e+06	5.95877e+06	5.22707e+06	8.82302e+06	5.26476e+06	6.14182e+06	6.8132e+06	7.3517e+06	6.86553e+06	6.64845e+06	7.61896e+06	7.59752e+06	0.0595677	C00294		7.13
IonPair	Arg/Pro pathway	Creatine	1.05406	0.372969	2.55734e+07	2.6956e+07	2.42674e+07	2.59586e+07	2.27257e+07	2.67037e+07	2.82119e+07	2.42524e+07	2.9077e+07	2.96278e+07	2.45909e+07	2.72321e+07	3.05737e+07	2.92879e+07	2.40898e+07	3.08128e+07	3.12682e+07	2.51569e+07	0.109219	C00300		5.29
IonPair	Lipid pathway	CDP-choline	0.76096	0.0104046	194380	147915	165771	230376	206819	179365	189569	148760	147920	167475	141961	133461	152166	194669	153869	175973	138567	121560	0.167098	C00307		6.68
IonPair	TCA cycle	Isocitric acid	1.20545	0.348707	35888.7	43262.1	43702	14372	46408.7	39261.3	35699.8	35724.5	39613.5	61797	41350.1	37825.6	49421	42499.4	53549.9	32341.1	39099.6	53416	0.189578	C00311		8.58
IonPair	Arg/Pro pathway	Citrulline	0.567563	0.0126705	349023	198093	349537	474241	379533	265190	276613	207707	234253	164179	231744	152580	261518	219166	280730	209164	192296	337650	0.216868	C00327		1.09
IonPair	PPP	6-Phospho-gluconic acid	1.50771	0.0102356	83522.4	125927	81610.2	65460.1	70948.9	76928.9	122664	118957	135166	111982	136016	127516	74209.8	101162	83355.1	96989.2	102863	78151.3	0.138815	C00345		8.65
IonPair	Glycolysis	Fructose-1,6-bisphosphate	1.09106	0.4418	1.29416e+07	1.41201e+07	1.08924e+07	1.31054e+07	1.37829e+07	1.19294e+07	1.49979e+07	1.26009e+07	1.85117e+07	1.11192e+07	1.36804e+07	1.46882e+07	1.17341e+07	1.2715e+07	1.19846e+07	1.07184e+07	1.31725e+07	1.13979e+07	0.0743457	C00354		8.67
IonPair	Purine pathway	Uric acid	1.46577	0.0138542	89180.6	130718	103234	107020	86620.8	97759.5	51268.8	161540	111016	131182	123160	126694	101164	106265	126223	78876.3	113885	120665	0.156533	C00366		6.16
IonPair	Purine pathway	Xanthine	0.977964	0.828065	249453	243956	232073	243523	200510	262575	308585	205045	230262	292429	273735	218311	231155	236310	238872	184482	238874	242295	0.0960312	C00385		7.14
IonPair	Purine pathway	Guanosine	1.09546	0.596276	57292	62761.3	49984.6	59520.3	66233	36969.1	73753	70420.2	60577.3	86673.5	54094.4	42041.1	51874	43026.9	62117	57796.6	55328.5	65285.8	0.141434	C00387		8.86
IonPair	Lys pathway	Pipecolinic acid	1.1805	0.0100094	3.75902e+07	4.43753e+07	3.9621e+07	4.16927e+07	3.84246e+07	3.5137e+07	3.30758e+07	4.06755e+07	4.78919e+07	4.44895e+07	4.27151e+07	4.61046e+07	3.75046e+07	3.53176e+07	4.23927e+07	3.73613e+07	3.64381e+07	4.6912e+07	0.112899	C00408		6.23
IonPair	One carbon metabolism	7,8-Dihydrofolic acid	0.942079	0.585587	2.52083e+06	2.37482e+06	2.33198e+06	3.13767e+06	2.44585e+06	2.03619e+06	2.65243e+06	2.17955e+06	2.61041e+06	1.83283e+06	2.36671e+06	2.88458e+06	2.45962e+06	2.29713e+06	2.50983e+06	3.34477e+06	2.16853e+06	2.48573e+06	0.162515	C00415		5.58
IonPair	#N/A	Farnesyl diphosphate(FPP)	0.96744	0.869438	51224.7	49556.8	48234.7	47914.2	68048	38223.9	53702.9	49226.6	55092	18577.3	69530.1	55358.2	50838.4	48355.7	33020.7	46836.6	49048.6	59748.6	0.180045	C00448		1.38
IonPair	Nicotinate and nicotinamide pathway	Nicotinamide ribonucleotide	1.19321	0.190566	107863	128704	129116	103435	107542	130908	68315.7	101801	130060	115823	145320	150513	59617.3	143295	113392	101549	111327	124959	0.257797	C00455		9.81
IonPair	Purine pathway	Allantoic acid	0.680536	0.0196839	48719	33155	50153.2	38252.9	63757.3	49307.3	42124.2	29753	28053.9	39954.6	29756.9	38256.7	41652.6	36554.6	36553.5	39079.8	43350	32301.3	0.104196	C00499		2.6
IonPair	Purine pathway	cAMP	0.945483	0.245184	638732	603910	567938	619685	634096	717163	654777	630149	620564	608216	597007	563614	582976	712888	642563	692721	629057	552230	0.0971357	C00575		8.87
IonPair	Arg/Pro pathway	Guanidoacetic acid	0.617634	0.0650266	97064.9	59950.6	81197.1	95694.1	107935	143237	57261.6	46597.2	53686.9	44872	93584.4	61012.8	122723	91676.1	100183	79246.2	49014.9	71172.5	0.295978	C00581		1.04
IonPair	Lipid pathway	Phosphorylcholine	0.796258	0.003779	3.02868e+07	2.41161e+07	3.24254e+07	3.28937e+07	3.13047e+07	2.76499e+07	2.71603e+07	2.53866e+07	2.34868e+07	2.26875e+07	2.64613e+07	2.25583e+07	2.50681e+07	2.51326e+07	2.96868e+07	2.37527e+07	2.53242e+07	2.96058e+07	0.0966485	C00588		7.1
IonPair	Lipid pathway	Glycerophosphoryl choline	1.12984	0.15483	3.79307e+07	4.28556e+07	3.6844e+07	4.23029e+07	4.28877e+07	3.41743e+07	3.34446e+07	4.89484e+07	4.56004e+07	3.448e+07	4.33599e+07	4.18893e+07	3.70253e+07	3.69311e+07	3.5811e+07	3.67825e+07	3.21738e+07	4.46654e+07	0.10956	C00670		7.11
IonPair	PPP	2-Deoxyribose-5-phosphate	0.801077	0.199925	53286	42686.2	55078.9	66660	68816	34958.4	40916.8	47816.5	37379.2	49433.1	40040.3	38761.9	53912.1	80880.2	63699.7	70436.9	69902.8	54777.9	0.157346	C00673		7.13
IonPair	Gly/Ser/Thr pathway	Betaine	1.40117	0.0505042	5.73753e+06	8.03926e+06	5.9901e+06	7.02812e+06	6.33807e+06	4.53982e+06	4.79154e+06	8.07571e+06	8.13022e+06	5.81049e+06	1.09119e+07	7.26793e+06	5.85752e+06	5.84573e+06	7.98555e+06	5.64148e+06	5.42772e+06	7.15625e+06	0.1609	C00719		1.01
IonPair	Arg/Pro pathway	Creatinine	1.00743	0.95415	7.28276e+06	7.33688e+06	9.12323e+06	7.59322e+06	8.13252e+06	5.69592e+06	5.86893e+06	8.4131e+06	7.34792e+06	6.11399e+06	9.0255e+06	5.78389e+06	5.43089e+06	6.15402e+06	5.6098e+06	6.50778e+06	4.40385e+06	6.73269e+06	0.146491	C00791		6.34
IonPair	Vitamine	Pantothenic acid	1.46818	0.0333012	1.28013e+06	1.87946e+06	948946	1.02893e+06	1.28693e+06	1.56752e+06	1.56832e+06	2.14185e+06	1.37159e+06	2.42237e+06	1.60068e+06	1.8608e+06	1.2534e+06	1.483e+06	1.46146e+06	1.34741e+06	1.69704e+06	1.57526e+06	0.10751	C00864		9.2
IonPair	Glucose pathway	Fructose-1-phosphate	0.945884	0.337748	6.34738e+06	6.00388e+06	5.72049e+06	6.49154e+06	6.41762e+06	6.01778e+06	7.08946e+06	5.5967e+06	6.80158e+06	5.46012e+06	5.87863e+06	6.28238e+06	6.04127e+06	6.49637e+06	6.13099e+06	6.19617e+06	5.63748e+06	6.15679e+06	0.0455541	C01094		7.1
IonPair	Purine pathway	Xanthosine	0.806206	0.23536	37629.7	30337.3	44747.4	21833.3	50156.8	39955.3	31455.5	29684	34852.1	35701.1	23804.7	27644.4	29501.4	30204	36319.7	32278.7	30993.3	37491.6	0.101631	C01762		4.72
IonPair	Glutathione pathway	Pyroglutamic acid	1.07316	0.539821	80373.7	86254.1	103884	74748.6	54078.7	76575.8	92581.4	85457	89206.9	94839.4	78516.2	83251.2	101353	54554.8	101906	57213.8	65783.2	88823.1	0.277832	C01879		5.58
IonPair	BCAA pathway	Citraconic acid	1.00588	0.886602	598366	601887	563298	611395	641507	543061	632568	575255	621103	585713	580053	647312	580151	666089	640223	610271	618907	523254	0.0823782	C02226		1.09
IonPair	Purine pathway	AICAR	0.96229	0.842427	35646.5	34302.3	49446.7	27201.4	27201.5	36129.7	38253.3	37405.6	31451.4	46328.1	16398.5	39928	30200.7	34575.1	33163.1	33153.8	34002.3	32353.1	0.0465623	C04677		8.84
IonPair	Purine pathway	GMP	0.977272	0.784512	2.78575e+07	2.72243e+07	2.42722e+07	3.1081e+07	2.43174e+07	3.05148e+07	2.91019e+07	2.83586e+07	2.63395e+07	3.30596e+07	2.49389e+07	2.3425e+07	2.34741e+07	2.91288e+07	2.81816e+07	2.33929e+07	2.25174e+07	2.91751e+07	0.121646	C06193		5.08
IonPair	BCAA pathway	Hydroxyisocaproic acid	0.487247	0.00052795	316168	154052	400704	305229	298845	300707	275354	115733	128345	198657	201068	126456	222959	220413	199887	218357	231214	195307	0.0652911	HMDB00746		1.08
Lipidomics	AcylCoA	AcylCoA(C18:1)	0.785282	0.0493615	1.83231e+06	1.43888e+06	1.83218e+06	1597634	1.68093e+06	2096498	1954296	1.82965e+06	1.6332e+06	1.21503e+06	1454676	1.06184e+06	2.10129e+06	1.93606e+06	1.69554e+06	1.60176e+06	1.34548e+06	1.60749e+06	0.142752		M+H	7.31787	1031.36
Lipidomics	AcylCoA	AcylCoA(C20:4)	0.881161	0.540783	773776	681821	837042	666028	703502	742552	919754	764383	712031	170308	901610	860773	615784	650772	706247	638624	781733	758350	0.104886		M+H	7.34115	1053.34
GC/MS	Ala/Asp/Glu pathway	Alanine	0.735934	0.000303198	95473.8	70262.4	100006	96736	90441	88089	102097	68634	62590	68973	81618	69497	48684	62157	64289	68403	70390	69946	0.158632
GC/MS	Ala/Asp/Glu pathway	Asparagine	1.02318	0.822859	1070641	1.09546e+06	797887	968769	969071	1303881	1313597	1052062	1128961	1121678	1140905	1033706	852138	1030713	1096047	1167474	1379828	1306210	0.14772
GC/MS	Ala/Asp/Glu pathway	Aspartic acid	0.846584	0.00387822	578507	489755	592801	534211	544456	615591	605476	452647	512992	506973	519924	456237	333028	377161	380767	464548	476437	468840	0.137041
GC/MS	Ala/Asp/Glu pathway	Glutamic acid	0.875387	0.00466802	6925001	6.06205e+06	7160068	6763610	6432004	7327127	6942196	5694489	6311202	6332788	6317699	5654093	3941949	4416734	4442793	5371981	5488698	5112856	0.118101
GC/MS	Arg/Pro pathway	Proline	0.80171	0.0143834	54511.2	43702.2	62142	55771	49894	49695	55054	37562	40447	46409	41729	52364	36399	42635	37839	39539	39970	53313	0.150429
GC/MS	BCAA pathway	Isoleucine	0.734021	0.00377691	5507.2	4042.4	5868	6116	5022	4792	5738	3456	3895	5014	3913	3934	3013	3670	3634	3572	4570	5369	0.184613
GC/MS	BCAA pathway	Valine	0.816862	0.00376517	153714	125563	166961	153114	153820	134219	160455	113945	126291	128554	136772	122253	101798	106335	124416	128738	118835	142139	0.146388
IonPair	Bile acid	Glycolithocholic acid	0.837486	0.781678	47093.4	39440	53177.9	135406	24485.1	0	22398	62954.1	29632.7	62298.1	0	42315.3	46025.1	46593	32262.8	34670.9	46315.5	67016.5	0.270648			1
IonPair	Bile acid	Glycocholic acid	0.850715	0.0690852	642089	546235	763301	622365	567227	577358	680196	584237	541426	496683	482908	625921	627795	624209	615109	581743	658260	565419	0.0548386			5.72
Lipidomics	Cardiolipin	CL(aaaa-68:2)	0.632552	0.00194367	6578147	4.16102e+06	6186871	7.93452e+06	6702621	6597870	5.46885e+06	5130798	3305602	3.58797e+06	4741941	4038800	4573347	4930053	3.47956e+06	5270255	3.37279e+06	4.05602e+06	0.199411		M-H	10.637	1405
Lipidomics	Cardiolipin	CL(aaaa-68:3)	0.511042	3.2718e-06	16440871	8.40197e+06	16898944	15606062	17084208	14870245	17744896	9505394	7646017	7105855	8557557	9195045	11679421	10188652	12664601	10729712	12293333	10200475	0.0899733		M-H	10.5364	1402.98
Lipidomics	Cardiolipin	CL(aaaa-68:4)	0.122553	5.41474e-07	1.32504e+07	1.62387e+06	15217759	11882536	12534096	12776044	13841428	1.09573e+06	1.35798e+06	0	2.4403e+06	3.22535e+06	3799010	4.82404e+06	4.97258e+06	2859745	6.13001e+06	5.95393e+06	0.273135		M-H	10.4388	1400.97
Lipidomics	Cardiolipin	CL(aaaa-70:3)	0.903864	0.143871	1.76796e+07	15979986	17478388	17757774	16366483	17170492	19625062	16661286	16460595	12537341	17351566	16889142	16253666	16682270	16034971	14670412	16697082	15525582	0.0488718		M-H	10.7178	1431.02
Lipidomics	Cardiolipin	CL(aaaa-70:4)	0.601244	2.26561e-05	1.11296e+08	6.6916e+07	108222056	111197024	105579504	108116488	123364104	71881200	64039380	53317672	71469600	73872032	87249392	83885248	87238936	80365408	83672800	82960880	0.028735		M-H	10.5496	1429
Lipidomics	Cardiolipin	CL(aaaa-70:5)	0.332137	7.41616e-06	45098876	1.4979e+07	46594712	42503472	45512104	41058940	49825152	15907934	13814560	13630043	16655310	14887247	26854946	25573638	25721326	25627842	27583118	28512414	0.0427475		M-H	10.4603	1426.99
Lipidomics	Cardiolipin	CL(aaaa-70:6)	0.3024	0.000105656	1.70972e+07	5170189	18160128	15443165	16378031	15443888	20060696	4.64364e+06	5317919	4.72084e+06	5.68729e+06	5.48126e+06	9270860	10702417	10497977	11020583	10188195	9756488	0.0789369		M-H	10.3747	1424.97
Lipidomics	Cardiolipin	CL(aaaa-70:7)	0.436493	1.20158e-06	33608712	1.467e+07	34427704	30450676	36067536	31891768	35205876	14275945	14510339	12594060	14657489	17312028	21739170	23810504	22860918	25982956	23337152	23609528	0.0649162		M-H	10.2791	1422.96
Lipidomics	Cardiolipin	CL(aaaa-72:5)	0.55611	2.01762e-05	5.49181e+07	3.05406e+07	55486904	52358008	54056788	50403952	62285080	33142474	27056102	25589826	32161022	34753348	40859124	39835380	43382240	39247432	40594120	37833044	0.0431296		M-H	10.5668	1455.01
Lipidomics	Cardiolipin	CL(aaaa-72:6)	0.466642	1.12799e-05	1.65737e+08	77339904	164949344	168081776	161777920	147312352	186564944	85139352	69576568	68477872	77635256	85870472	111468176	114861112	111462728	113339232	109944136	104925208	0.0313137		M-H	10.5133	1453
Lipidomics	Cardiolipin	CL(aaaa-72:7)	0.378038	2.36447e-06	1.88549e+08	7.12786e+07	185414640	181719120	187834544	178824960	208950464	76284968	68452216	63563344	73303088	74789432	114193792	111898512	112999920	114695688	114583992	116353512	0.0160716		M-H	10.3967	1450.98
Lipidomics	Cardiolipin	CL(aaaa-72:8)	0.309538	2.4406e-05	98392896	3.04563e+07	109516096	93740344	91045184	90795336	106867520	34588732	28168356	28172324	29065044	32287212	62793784	57928704	59455040	54206344	63313868	60321108	0.0574307		M-H	10.3166	1448.97
Lipidomics	Cardiolipin	CL(aaaa-74:8)	0.470738	4.70213e-07	2.76549e+08	1.30182e+08	280900352	271952736	272350176	256341088	301202944	138881152	119792304	112937360	141160736	138140672	184877104	187307984	184506368	185626640	192046992	186475680	0.0150879		M-H	10.4734	1477
Lipidomics	Cardiolipin	CL(aaaa-74:10)	0.358247	4.0436e-07	1.70768e+08	6.11773e+07	182597200	164016256	163451552	159701792	184074976	62276108	57466624	50257752	63259752	72626240	107267472	108416768	107501664	107502472	116690520	110019440	0.0308745		M-H	10.373	1472.97
Lipidomics	Cardiolipin	CL(aaaa-76:9)	0.868852	0.0129299	3.66417e+07	3.18362e+07	36766640	38977116	32998506	37928776	36537448	30627026	32582504	28572596	32070724	35328156	31386540	33977160	31966384	34064888	32957714	36518392	0.0519796		M-H	10.6292	1503.01
Lipidomics	Cardiolipin	CL(aaaa-76:10)	0.50749	3.78953e-08	3.10663e+08	1.57658e+08	313800064	304742464	301574336	302625824	330572160	160235712	153492256	141116256	159788448	173658592	205028384	211597600	213862688	218693728	219046272	221050144	0.025418		M-H	10.538	1501
Lipidomics	Cardiolipin	CL(aaaa-76:11)	0.335101	2.65665e-06	2.31136e+08	7.74537e+07	252867664	221477664	218341776	218272528	244718400	77673648	72363328	68427168	81180392	87623768	131131264	134577584	137014096	128899912	137784752	135429488	0.0239048		M-H	10.4003	1498.98
Lipidomics	Cardiolipin	CL(aaaa-76:12)	0.412034	3.01563e-07	1.44157e+08	59397460	153188256	137522256	138474768	136879232	154718384	62844240	57182328	47140088	61062660	68757984	93554848	97046016	96392544	100004616	100397152	96405224	0.0301797		M-H	10.3338	1496.97
Lipidomics	Ceramide	Cer(16:0)	0.677414	0.0328298	3.38829e+06	2.29527e+06	3628323	3114271	3.73688e+06	3.81269e+06	2.64928e+06	1.20436e+06	2.87904e+06	2323874	3137901	1931192	2275434	3.44741e+06	3167875	3.12335e+06	3.64053e+06	3282795	0.178526		M+Acid	10.0009	537.511
Lipidomics	Ceramide	Cer(16:1)	0.651055	6.97728e-05	2.02519e+06	1.31851e+06	2.00271e+06	1.84734e+06	2.01326e+06	2102260	2.16037e+06	1.24751e+06	1.45524e+06	1.34488e+06	1.463e+06	1.08191e+06	1.7725e+06	1.15408e+06	1.71699e+06	1.75426e+06	2.46685e+06	1.71611e+06	0.222175		M+Acid	9.81247	535.496
Lipidomics	Ceramide	Cer(18:0)	0.70721	2.40188e-05	2.51315e+08	177732608	256600160	253036752	252275552	238144320	256519984	177515888	173371904	159534992	182550976	195689280	229201792	218469840	217164288	216062880	206109904	211007296	0.0335332		M+Acid	10.232	565.542
Lipidomics	Ceramide	Cer(18:1)	0.727894	4.08072e-06	7.13299e+07	5.19206e+07	70970088	74902080	71079168	69017184	70680752	49023672	51580632	55963080	49463972	53571608	59848780	59420304	62079168	61757024	60338884	64146280	0.0287407		M+Acid	10.0476	563.527
Lipidomics	Ceramide	Cer(20:0)	0.483576	2.08601e-05	49428248	2.39023e+07	51456852	50172384	50867132	45936000	48708872	27879834	22890576	17433432	27577230	23730516	37569384	36147464	33907256	35703468	34752692	33319660	0.0421922		M+Acid	10.4306	593.574
Lipidomics	Ceramide	Cer(20:1)	0.67413	0.000230304	5.45653e+06	3.67841e+06	5255810	5851215	4.92935e+06	5703836	5.54241e+06	4215152	3.62198e+06	3.94029e+06	3684064	2.93056e+06	3.90254e+06	4.12863e+06	4.91664e+06	4.41212e+06	4788290	4643148	0.0988897		M+Acid	10.2825	591.558
Lipidomics	Ceramide	Cer(21:0)	0.757552	0.00360643	1.02328e+07	7.75185e+06	10588192	9449971	10028745	10443979	10652930	8057172	8501795	6.24475e+06	8822840	7132691	9672614	9175687	9375846	8952569	9679709	10073106	0.0396057		M+Acid	10.5335	607.589
Lipidomics	Ceramide	Cer(21:1)	0.936968	0.241231	5.39132e+06	5.05149e+06	5.77473e+06	5275883	5148945	5323001	5434046	4699433	5944192	5042593	4950629	4.62063e+06	4708158	5.2233e+06	5726127	5.63752e+06	5.67776e+06	5.7156e+06	0.0707479		M+Acid	10.3887	605.573
Lipidomics	Ceramide	Cer(22:0)	0.836268	0.0261985	1.9743e+07	1.65105e+07	19360274	19377008	21740268	19610554	18627112	17473824	16578793	13239862	19206006	16053871	20002476	19114272	20219036	19162152	18298366	18683930	0.0360371		M+Acid	10.6125	621.604
Lipidomics	Ceramide	Cer(22:1)	0.690848	0.000204335	1.14179e+07	7.88802e+06	11771626	11425128	11129999	11502686	11259984	7289470	7.10285e+06	8981491	7892812	8.17347e+06	9113522	9264405	8978598	8935771	10204067	8833030	0.0503107		M+Acid	10.4724	619.589
Lipidomics	Ceramide	Cer(23:0)	0.814181	0.0314846	1.62954e+07	1.32674e+07	17347530	16199550	16358166	16382077	15189743	14222667	14159598	9834916	15440280	12679626	18265280	16364751	16759129	15308931	15639704	15989011	0.0664504		M+Acid	10.71	635.62
Lipidomics	Ceramide	Cer(23:1)	1.09344	0.00953084	2.22425e+07	24320864	23040236	22869490	20906092	21811604	22584994	22719170	23828008	25113588	24890032	25053522	23168666	24832202	24686348	24310544	23429638	23010652	0.0307151		M+Acid	10.5663	633.605
Lipidomics	Ceramide	Cer(24:0)	0.659283	0.000465958	1.86453e+07	1.22925e+07	18128962	18654222	19826220	18926750	17690348	13306996	11924333	9375597	13854420	13001307	18052776	17025400	16644310	16331282	15385246	17088202	0.0495039		M+Acid	10.7809	649.635
Lipidomics	Ceramide	Cer(24:1)	1.03273	0.0691379	1.61893e+08	167192800	166282400	162431088	160460336	156422992	163869440	174010672	164767840	163343104	165471440	168370944	170509136	168943984	168207120	165912320	166908176	160566976	0.01922		M+Acid	10.627	647.62
Lipidomics	Ceramide	Cer(24:2)	0.829098	0.00669843	1.1452e+07	9.49481e+06	11523238	11395800	11250428	11634409	11455998	8421679	9145300	10795132	9723153	9388804	10955807	10446106	11137070	10408884	10156653	10771716	0.0397585		M+Acid	10.5003	645.604
Lipidomics	Ceramide	Cer(25:1)	1.89284	0.000138931	4.94001e+06	9.35067e+06	5119326	4820811	5.21624e+06	4616461	4927214	10132204	9388866	7962641	9476547	9793109	8227899	7.85779e+06	7.25998e+06	7064329	7.47105e+06	7.17656e+06	0.0671418		M+Acid	10.7156	661.635
Lipidomics	Ceramide	Cer(26:0)	0.812826	0.172385	216182	175719	154522	221400	230305	221686	253000	258629	164763	145852	144153	165196	237741	190163	177575	309745	198707	217086	0.197034		M+Acid	10.9278	677.666
Lipidomics	Ceramide	Cer(26:1)	0.871886	0.181316	3.02823e+06	2.64027e+06	3496285	3.48046e+06	2.58532e+06	2.66676e+06	2912334	3.16295e+06	2380128	2.16359e+06	2.90102e+06	2.59369e+06	3.13552e+06	3.00114e+06	3.07852e+06	2.97056e+06	2.63777e+06	2.67584e+06	0.0680845		M+Acid	10.7965	675.651
Lipidomics	Ceramide	Cer(26:2)	1.16358	0.178838	996743	1.15979e+06	867183	1.09288e+06	973028	905759	1.14487e+06	1.08866e+06	986475	959546	1.41283e+06	1.35143e+06	782068	1.00973e+06	951976	844547	1.12714e+06	928782	0.166344		M+Acid	10.6798	673.635
Lipidomics	Ceramide	Cer(26:4)	0.638087	0.000288309	6.22139e+06	3.96979e+06	6193117	7.10661e+06	5845120	6413210	5548893	4.23852e+06	4361333	3.76731e+06	3.79314e+06	3.68864e+06	4629082	4851575	4977396	4761985	5.92024e+06	4.77425e+06	0.0919226		M+Acid	10.4366	669.606
Lipidomics	Ceramide	Cer(26:5)	2.27784	6.24298e-06	4.01352e+06	9.14218e+06	4778008	4575352	4.16084e+06	3.01184e+06	3541570	9620142	8442368	9802328	9747290	8098768	7012616	6.36399e+06	6760689	6790019	7433639	6672105	0.0627044		M+Acid	10.2851	667.59
Lipidomics	Ceramide	Cer(26:7)	0.785969	0.00216475	3.70607e+06	2912858	3339307	3.69562e+06	4.17719e+06	3.53888e+06	3.77938e+06	2.74828e+06	2.90707e+06	2671991	3.15128e+06	3.08567e+06	4.18577e+06	3.73683e+06	4.20887e+06	3.35703e+06	3.50839e+06	3.75696e+06	0.0836296		M+Acid	10.0894	663.558
Lipidomics	Cholesterol	Cholesterol	1.0993	0.508322	1801709210	1980613890	1680604160	2048822020	1825605500	1731351300	1722163070	2609317890	2482159360	1368665730	1762364930	1680561540	1757788930	1699382400	1737209600	1726108030	1751633280	1748639230	0.0126916		M+H-H2O	9.54953	386.355
Lipidomics	Cholesterol	Cholesterol sulfate	1.24221	0.0429452	26817202	3.33127e+07	28467288	26068332	26251220	26793254	26505916	29062400	33848364	27427016	37248096	38977488	26040660	27099668	30331578	31219544	31455862	32902842	0.094986		M-H	8.2215	466.311
Lipidomics	Cholesterol	Cholesterol (-H2) sulfate	0.551384	0.000380127	599834	330739	588412	642411	704470	564076	499801	306486	397407	280366	363391	306046	437930	441736	357247	365510	521547	393311	0.133541		M-H	7.98474	464.296
Lipidomics	Cholesteryl esters(acyl)	CE(a-18:2)	0.699306	0.0246649	6.08009e+06	4.25184e+06	4886049	6108542	6.0705e+06	8023246	5312097	3.60882e+06	3.87184e+06	4406729	5.4846e+06	3887221	4.55509e+06	4.67699e+06	4380426	4.96862e+06	4749559	5159115	0.0609636		M+Na	11.349	648.585
Lipidomics	Cholesteryl esters(acyl)	CE(a-20:4)	1.13587	0.0993099	1.99513e+07	2.26622e+07	17277082	19775524	21459702	23388328	17856070	20984324	20480336	22420794	24630620	24795000	16499388	19346866	20973440	19067720	18642766	17378106	0.0802208		M+Na	11.3124	672.584
Lipidomics	Cholesteryl esters(acyl)	CE(a-22:6)	1.50698	0.0325479	1.04202e+07	1.5703e+07	7.64838e+06	9563029	10399582	14831040	9658848	10648186	18735182	18968488	16839408	13323502	10968629	12679386	11905374	11081740	10386470	11777124	0.0666074		M+Na	11.2954	696.584
GC/MS	Cys/Met pathway	Methionine	0.910673	0.134867	1.56554e+06	1.4257e+06	1552440	1461116	1445406	1797301	1571441	1297245	1453598	1567232	1513636	1296770	1228650	1415829	1432901	1938580	1977583	1956683	0.204058
Lipidomics	deoxy-Ceramide	deoxy-Cer(22:0)	1.09777	0.354623	1.9041e+06	2.09026e+06	1.99769e+06	1.60734e+06	1.94098e+06	1.88926e+06	2.08522e+06	1.90708e+06	2.50068e+06	2.47067e+06	1.89268e+06	1.68021e+06	2.07819e+06	1.94578e+06	2190114	2.23804e+06	2.03446e+06	1.78401e+06	0.0812599		M+Acid	10.6259	605.609
Lipidomics	deoxy-Ceramide	deoxy-Cer(24:0)	0.822095	0.00433642	8.64305e+06	7.10541e+06	8466281	8546869	8893641	8765319	8543161	6564161	7.56577e+06	7933146	6455751	7008249	7988209	8309739	8.31149e+06	7923337	7755804	7866147	0.0270976		M+Acid	10.7745	633.641
Lipidomics	deoxy-Ceramide	deoxy-Cer(24:1)	1.30175	0.125504	1.06563e+06	1.38719e+06	1.47482e+06	858318	724970	1.19692e+06	1.07312e+06	1.18956e+06	1509308	1.86468e+06	1.18655e+06	1.18583e+06	1.18319e+06	1.41761e+06	1.37073e+06	1.68938e+06	1560499	1.56399e+06	0.124769		M+Acid	10.6455	631.625
Lipidomics	deoxy-Ceramide	deoxy-Cer(25:0)	4.97169	0.000119485	181212	900932	0	233634	277049	395378	0	861461	1.07119e+06	990167	726554	855285	444444	579144	421148	669758	479624	369469	0.208563		M+Acid	10.8444	647.656
Lipidomics	deoxy-Ceramide	deoxy-Cer(26:0)	3.57525	5.61758e-05	1.04812e+06	3.74729e+06	1.60133e+06	1.27664e+06	1.07063e+06	1.00472e+06	287273	3.90188e+06	3854391	3.57241e+06	3.48644e+06	3.92134e+06	2.60569e+06	2.81816e+06	2.6586e+06	2.62304e+06	2.51636e+06	2126020	0.0843177		M+Acid	10.9112	661.672
Lipidomics	deoxy-Dihydroceramide	deoxy-DHC(18:0)	0.325718	0.000675521	2.43169e+06	792045	2.48738e+06	2.95683e+06	2.08384e+06	2.7266e+06	1.90383e+06	0	811597	1.41334e+06	990793	744495	1.28976e+06	1.68273e+06	1.40769e+06	1.81257e+06	1.551e+06	1.78293e+06	0.177558		M+Acid	10.4043	551.563
Lipidomics	deoxy-Dihydroceramide	deoxy-DHC(20:0)	0.770565	0.0244562	2.93394e+06	2.26079e+06	3.15127e+06	3041305	3.10112e+06	2.15992e+06	3.21607e+06	2.40282e+06	2.22761e+06	2323380	2.16999e+06	2.18014e+06	2.98401e+06	1.83052e+06	1.86533e+06	2403448	3.04065e+06	2.83393e+06	0.200673		M+Acid	10.577	579.594
Lipidomics	deoxy-Dihydroceramide	deoxy-DHC(22:0)	0.633045	0.000124108	3.88254e+06	2.45782e+06	4.27299e+06	3899553	3570395	3514905	4.15485e+06	2.71928e+06	2553115	2415836	2.16543e+06	2435450	3383021	3.39768e+06	3.61221e+06	3.2069e+06	3.06407e+06	3.32525e+06	0.0530596		M+Acid	10.7559	607.625
Lipidomics	deoxy-Dihydroceramide	deoxy-DHC(23:0)	0.842136	0.00130598	1.53724e+06	1.29456e+06	1.62119e+06	1.45708e+06	1.50872e+06	1.52895e+06	1.57025e+06	1.20305e+06	1.43732e+06	1.26705e+06	1.29904e+06	1.26633e+06	1.84429e+06	1.56477e+06	1.42236e+06	1.53661e+06	1.57637e+06	1.29065e+06	0.125575		M+Acid	10.8269	621.64
Lipidomics	deoxy-Dihydroceramide	deoxy-DHC(24:0)	0.430941	2.43471e-07	3.87985e+06	1.67199e+06	4.15736e+06	3.706e+06	3.9678e+06	3.73703e+06	3.83105e+06	1.77816e+06	1.72194e+06	1524920	1.60352e+06	1.7314e+06	3.03394e+06	2.96269e+06	2.96103e+06	2802686	2.72103e+06	2634682	0.0518198		M+Acid	10.8954	635.656
Lipidomics	Diacylglycerol(acyl)	DG(aa-34:0)	0.744745	1.69682e-05	7960251	5.92836e+06	7.96174e+06	7.90746e+06	8424450	7.99042e+06	7.51718e+06	5975325	6.12765e+06	5.67424e+06	5.93966e+06	5924908	6491125	7329221	6545083	7159727	5681428	7060960	0.0826377		M+NH4	10.6085	596.537
Lipidomics	Diacylglycerol(acyl)	DG(aa-34:1)	0.874331	0.0576655	7.22454e+07	6.31664e+07	69189000	79071592	63541232	69930048	79495336	65588840	62398484	62414572	70993632	54436524	73287296	71019536	72713792	64585044	66303956	68511240	0.0499047		M+NH4	10.4472	594.522
Lipidomics	Diacylglycerol(acyl)	DG(aa-34:2)	0.910186	0.562442	1.18303e+06	1.07677e+06	726729	1.31705e+06	1165356	1517703	1.18829e+06	1.39369e+06	1243921	1.06797e+06	977158	701131	1.22587e+06	1.13472e+06	1625327	1.02622e+06	699721	729014	0.291824		M+NH4	10.3116	592.506
Lipidomics	Diacylglycerol(acyl)	DG(aa-36:1)	1.56919	9.74961e-05	1.57534e+08	2.47201e+08	166499312	164285472	136856560	146828656	173201728	254304448	249468576	225585968	277782400	228861344	203929728	198291008	202729648	197744048	198942320	198950944	0.015643		M+NH4	10.6375	622.553
Lipidomics	Diacylglycerol(acyl)	DG(aa-36:2)	0.944682	0.53635	23240514	2.19549e+07	24296054	25817656	18912518	21775060	25401282	22880268	20266386	21084230	27239866	18303784	24619998	23515336	22703472	22009766	23882536	21955448	0.0474662		M+NH4	10.501	620.537
Lipidomics	Diacylglycerol(acyl)	DG(aa-36:3)	0.782776	0.0584936	7062871	5.52865e+06	7.01132e+06	8968451	5313445	6897643	7.12349e+06	4942307	5.12588e+06	6779858	5465257	5.32995e+06	5.20546e+06	7.2504e+06	6233400	7.10318e+06	7337805	4.36093e+06	0.182502		M+NH4	10.3632	618.521
Lipidomics	Diacylglycerol(acyl)	DG(aa-36:4)	0.962114	0.700913	6.49436e+06	6.24831e+06	5319804	8550964	6.18084e+06	5895916	6.52427e+06	6245224	5.48579e+06	7070483	6006508	6.43357e+06	5.91109e+06	6092193	6.61692e+06	7666679	7371542	6.78379e+06	0.0934218		M+NH4	10.2316	616.506
Lipidomics	Diacylglycerol(acyl)	DG(aa-37:1)	4.00972	0.000583319	820711	3.29082e+06	1.24969e+06	931089	994302	0	928468	3766596	3.78766e+06	2.92109e+06	3.87553e+06	2103207	1.62025e+06	1.6064e+06	2.41413e+06	1.46991e+06	1599539	2238277	0.21396		M+NH4	10.7176	636.569
Lipidomics	Diacylglycerol(acyl)	DG(aa-38:1)	0.977462	0.744462	3.28272e+07	3.20874e+07	35692288	33964580	28446296	30102718	35930356	35221568	32903892	26730294	35049412	30531728	33530574	31923202	31406972	31879672	31588496	32579882	0.0269329		M+NH4	10.7978	650.585
Lipidomics	Diacylglycerol(acyl)	DG(aa-38:2)	1.30279	0.000880046	3.31335e+07	4.31661e+07	34666828	35442932	29339266	29846072	36372416	44412016	44593648	40614676	46286944	39922992	38888264	37223172	37484916	36930464	37091716	36451436	0.0207102		M+NH4	10.672	648.569
Lipidomics	Diacylglycerol(acyl)	DG(aa-38:3)	0.87164	0.0254742	4.58944e+07	4.00034e+07	42482304	52270772	43940620	43866272	46911968	39102288	40987692	39072400	41505672	39348844	43608348	44166816	40071112	43247568	43474756	43616192	0.0327741		M+NH4	10.5524	646.552
Lipidomics	Diacylglycerol(acyl)	DG(aa-38:4)	0.707072	0.00458467	4.66715e+07	3.30001e+07	40817760	56458064	48258096	45310352	42513260	37680860	31920380	34078008	31879988	29441390	40018508	39445896	40487396	38304112	38862808	37272884	0.0283744		M+NH4	10.4195	644.537
Lipidomics	Diacylglycerol(acyl)	DG(aa-38:5)	0.874345	0.0532067	15564679	1.36089e+07	14874794	18408950	14450944	15412433	14676274	14285796	12842999	13627835	14392754	12895139	15896438	14832447	16025908	15565692	10602937	13494211	0.132534		M+NH4	10.3456	642.521
Lipidomics	Diacylglycerol(acyl)	DG(aa-38:6)	0.952901	0.590628	6.32199e+06	6.02423e+06	4.98052e+06	7490771	6071772	6714183	6352698	5.54593e+06	5.87133e+06	6.74852e+06	5.12158e+06	6833782	6.83638e+06	6307881	5.97264e+06	6992049	7018812	5.90883e+06	0.0714114		M+NH4	10.2739	640.505
Lipidomics	Diacylglycerol(acyl)	DG(aa-39:1)	1.89548	0.0017093	2.25564e+06	4.27553e+06	2009058	2.63324e+06	2.02751e+06	2.07396e+06	2.53444e+06	5211437	4.44682e+06	3412234	4.5963e+06	3.71086e+06	3.31367e+06	3543313	2.78571e+06	2.65068e+06	1.86979e+06	3348837	0.197572		M+NH4	10.8735	664.6
Lipidomics	Diacylglycerol(acyl)	DG(aa-39:2)	1.97812	0.00755669	917484	1.81489e+06	1380614	721700	501291	832132	1151685	2.24984e+06	1.97284e+06	1.52946e+06	1.20654e+06	2115781	1.66106e+06	1.16092e+06	1.62853e+06	1.39192e+06	1.23397e+06	661604	0.26616		M+NH4	10.7547	662.585
Lipidomics	Diacylglycerol(acyl)	DG(aa-39:4)	1.81711	0.0348171	630403	1.14551e+06	692116	899034	0	674740	886124	1.11937e+06	1.20606e+06	1.0747e+06	1.49665e+06	830758	715084	942855	810840	877595	1.09792e+06	1.19013e+06	0.185096		M+NH4	10.5824	658.552
Lipidomics	Diacylglycerol(acyl)	DG(aa-40:1)	0.760409	0.0232601	2.36436e+07	1.79788e+07	27180718	24330690	20108048	21608416	24990184	22670392	17614716	12957628	19099426	17551856	19177498	21661016	20737086	19917428	19812116	19819424	0.0411708		M+NH4	10.9455	678.615
Lipidomics	Diacylglycerol(acyl)	DG(aa-40:2)	1.31321	0.00676969	2.48067e+07	3.25764e+07	28109306	26321592	20176524	22450902	26974988	35877340	33427830	28841344	35645204	29090390	26759690	27881992	27498830	27480946	26836830	27094884	0.0325892		M+NH4	10.8243	676.6
Lipidomics	Diacylglycerol(acyl)	DG(aa-40:3)	1.66577	0.000124072	4.0993e+06	6.8285e+06	4495205	4.17644e+06	3.57393e+06	3697598	4553346	7811115	6835965	5.93871e+06	6.83785e+06	6.71884e+06	5.44874e+06	5.14726e+06	4.68962e+06	5249904	5207822	5.14818e+06	0.0444696		M+NH4	10.7204	674.584
Lipidomics	Diacylglycerol(acyl)	DG(aa-40:4)	1.70565	1.68791e-05	3.24989e+07	5.54316e+07	32545224	35722804	29382214	30558424	34285852	52820680	53001572	51768024	58902448	60665484	44232724	43054732	44717404	40622184	43906488	42964144	0.0334475		M+NH4	10.6291	672.568
Lipidomics	Diacylglycerol(acyl)	DG(aa-40:5)	0.995485	0.946164	7.17061e+06	7.13824e+06	6269651	8052483	6971088	7186131	7373696	7309914	6.92339e+06	6220510	8410567	6.8268e+06	7145978	6965191	8078732	7661563	7891096	7241673	0.0544214		M+NH4	10.527	670.553
Lipidomics	Diacylglycerol(acyl)	DG(aa-40:6)	0.750387	0.0305188	3.34475e+06	2.50985e+06	2.76744e+06	4343796	3.25694e+06	3.16355e+06	3.192e+06	2.13541e+06	2.81837e+06	2.58459e+06	2.62416e+06	2.38674e+06	4240032	3.32616e+06	2749502	2.98815e+06	3502152	2683041	0.170264		M+NH4	10.3974	668.538
Lipidomics	Diacylglycerol(acyl)	DG(aa-42:1)	0.358554	1.62385e-06	3.12304e+07	1.11978e+07	34897908	30799030	28121878	29663586	32669650	13511088	10834143	8287680	10795851	12560154	21677846	21222250	18703144	20422472	20249192	20815666	0.0512299		M+NH4	11.08	706.647
Lipidomics	Diacylglycerol(acyl)	DG(aa-42:2)	0.898849	0.207983	3.02038e+07	2.71487e+07	33631868	31609176	24444546	28577764	32755712	30436152	27930050	21622304	28136310	27618508	27681552	30054070	28072254	30227632	26526482	27349276	0.0483974		M+NH4	10.9662	704.632
Lipidomics	Diacylglycerol(acyl)	DG(aa-42:3)	0.758939	0.0531343	2.01565e+06	1.52975e+06	2.18605e+06	2.05014e+06	1918455	2.05567e+06	1.86792e+06	2.13527e+06	1.15168e+06	1442743	1715741	1203335	1.71698e+06	1.84112e+06	1132060	1.36642e+06	1433561	946466	0.234699		M+NH4	10.8717	702.615
Lipidomics	Diacylglycerol(acyl)	DG(aa-42:4)	1.25636	0.0236576	5.58493e+06	7016683	5959939	6341505	4.88205e+06	5353649	5387529	7690709	6868592	5.44798e+06	7459192	7.61694e+06	6240932	5845831	6069703	6399487	5979403	6.26644e+06	0.0439548		M+NH4	10.7941	700.599
Lipidomics	Diacylglycerol(acyl)	DG(aa-42:5)	1.71302	0.000239102	2.73269e+06	4.68117e+06	3.18777e+06	2627575	2406913	2.2286e+06	3.2126e+06	4.99497e+06	4.20026e+06	4070739	4884947	5.25493e+06	3.72264e+06	3764276	3.78824e+06	3.48755e+06	3.74512e+06	3415188	0.0628707		M+NH4	10.6872	698.584
Lipidomics	Diacylglycerol(acyl)	DG(aa-44:2)	0.374041	7.26785e-05	4.85172e+06	1.81474e+06	5703468	5.18458e+06	4.08793e+06	4238572	5.04403e+06	2378289	1.89366e+06	1.37837e+06	1.35651e+06	2066872	3.30396e+06	2.99729e+06	3.09875e+06	3.27961e+06	3326096	3.56743e+06	0.0559136		M+NH4	11.099	732.662
Lipidomics	Diacylglycerol(acyl)	DG(aa-44:4)	0.630478	0.000962503	4.82508e+06	3.04211e+06	5.39013e+06	5028754	4199462	4.48914e+06	5017926	3580910	2.78467e+06	2.36711e+06	2.71268e+06	3.76517e+06	4.70156e+06	3.79467e+06	3679757	4.0283e+06	3.89567e+06	3.48425e+06	0.0980479		M+NH4	10.9768	728.631
Lipidomics	Diacylglycerol(acyl)	DG(aa-44:5)	1.78588	0.000117292	3421051	6.10958e+06	4390562	3.45862e+06	2908449	3.34625e+06	3001374	6400542	5954314	5204922	6.07077e+06	6917340	4207178	4.13482e+06	4965171	3.04037e+06	4898666	5135384	0.173093		M+NH4	10.8459	726.616
Lipidomics	Diacylglycerol(alk)	DG(ae-34:1)	1.15944	0.0885962	6709447	7.77923e+06	6589292	6848889	5931630	6546762	7630662	8452741	7152627	8484777	8540418	6.2656e+06	7.36506e+06	7514419	6364545	6985718	6699442	6.56375e+06	0.0733601		M+NH4	10.6311	580.542
Lipidomics	Diacylglycerol(alk)	DG(ae-34:2)	0.984608	0.809848	5.44481e+06	5.36101e+06	5671289	5484416	5775665	5262964	5029719	5000242	5.42872e+06	6190824	5.75223e+06	4.43302e+06	5160986	5.01668e+06	5400107	4.87212e+06	5187922	4703145	0.0527386		M+NH4	10.6211	578.527
Lipidomics	Diacylglycerol(alk)	DG(ae-36:1)	1.64183	0.000331257	4.71538e+06	7.74183e+06	5336069	4.84577e+06	4.41812e+06	4.12569e+06	4851237	8.18863e+06	7.74329e+06	7707777	8653702	6.41575e+06	5.81709e+06	5918115	6087754	5821848	5.87335e+06	5539483	0.0280111		M+NH4	10.783	608.573
Lipidomics	Diacylglycerol(alk)	DG(ae-36:2)	1.74759	0.00129915	3.96069e+06	6921652	4205711	3.81907e+06	3.9697e+06	3.90656e+06	3.90239e+06	7.13743e+06	6883036	7.46155e+06	7653434	5472808	5.11923e+06	4.68972e+06	5.14e+06	4901627	4.70792e+06	4.62899e+06	0.0538522		M+NH4	10.6705	606.557
Lipidomics	Diacylglycerol(alk)	DG(ae-36:2)	1.20153	0.0191693	16032596	1.92636e+07	17120368	16623764	15757494	14715984	15945370	20828244	19584706	18724166	21095836	16085165	17312324	17977212	17301018	16387404	17739734	16873884	0.0338759		M+NH4	10.7894	606.557
Lipidomics	Diacylglycerol(alk)	DG(ae-36:3)	3.38126	0.000185304	9.58618e+06	3.24133e+07	10844988	9956875	8686932	8714030	9728061	31765692	34174192	33951424	36719984	25455306	19871112	20307600	18856568	19921236	21329006	19039096	0.0428268		M+NH4	10.6492	604.543
Lipidomics	Diacylglycerol(alk)	DG(ae-38:1)	0.853597	0.245755	3.10475e+06	2.6502e+06	3.4656e+06	3.22518e+06	2.87353e+06	2.72604e+06	3.23339e+06	3.10353e+06	2682191	2.49562e+06	3.43054e+06	1.53915e+06	2.84527e+06	2642403	3.27784e+06	2.85217e+06	2.91425e+06	2610616	0.0766951		M+NH4	10.937	636.605
Lipidomics	Diacylglycerol(alk)	DG(ae-38:2)	2.32616	2.93557e-05	3.88603e+06	9.03955e+06	4494852	4.21678e+06	3417754	3574933	3725850	8971164	9167494	9092996	10247068	7719051	5735362	5.68514e+06	6331903	5794509	5670675	5.44399e+06	0.049855		M+NH4	10.8277	634.589
Lipidomics	Diacylglycerol(alk)	DG(ae-38:2)	1.07545	0.292379	8.80656e+06	9.47098e+06	9277805	9231935	8288825	7995216	9239018	10906644	9147687	8402570	10408110	8489898	9514672	8978088	8930557	8617631	9204801	8718390	0.0358954		M+NH4	10.9362	634.589
Lipidomics	Diacylglycerol(alk)	DG(ae-38:3)	3.9038	7.87495e-06	1.18372e+07	4.62102e+07	13654357	12998441	10476417	10289658	11767265	48035672	48322936	45749576	49424456	39518368	25546096	26429414	25725896	26443272	25327604	26466112	0.0219608		M+NH4	10.7976	632.575
Lipidomics	Diacylglycerol(alk)	DG(ae-38:5)	1.1353	0.0185381	9.67089e+06	1.09794e+07	9959023	9844949	9286265	9365435	9898802	10601370	10334572	11463523	12160763	10336554	10650687	9555523	10323768	10464094	8608636	9928562	0.0763066		M+NH4	10.6323	628.542
Lipidomics	Diacylglycerol(alk)	DG(ae-38:6)	1.3986	0.00505932	1.76711e+06	2.47148e+06	1432025	1.77223e+06	1.85752e+06	1.76059e+06	2013200	2.03371e+06	2402376	2.69784e+06	2.34933e+06	2874164	2.61459e+06	1.90356e+06	2.62038e+06	2607289	2.15859e+06	2.47134e+06	0.113855		M+NH4	10.4743	626.525
Lipidomics	Diacylglycerol(alk)	DG(ae-40:2)	0.765141	0.0924513	1.52184e+06	1.16442e+06	1665795	1160163	1.58156e+06	1.46413e+06	1.73757e+06	1563632	922928	867580	958990	1.50899e+06	1387982	1.29771e+06	1.05619e+06	1.53753e+06	952277	1.11488e+06	0.16466		M+NH4	10.9536	662.621
Lipidomics	Diacylglycerol(alk)	DG(ae-40:3)	1.25104	0.191104	308468	385907	352547	330600	281125	342412	235656	374850	517528	223494	411894	401770	247262	217989	246915	196546	242948	329701	0.203604		M+NH4	10.8523	660.606
Lipidomics	Diacylglycerol(alk)	DG(ae-40:3)	1.37587	0.000157528	2.98879e+06	4.11218e+06	2999539	3.08296e+06	2.90908e+06	2.79966e+06	3152733	4262585	4317431	3668744	4256799	4.05536e+06	3507725	3.78704e+06	3.52296e+06	3.39029e+06	3.14155e+06	2.87789e+06	0.0893995		M+NH4	10.944	660.606
Lipidomics	Diacylglycerol(alk)	DG(ae-40:4)	1.4972	0.0032233	2.51648e+06	3.76767e+06	2.70326e+06	3.29848e+06	1.90678e+06	2.27831e+06	2.39556e+06	3745326	3294771	4.17145e+06	4.16472e+06	3.4621e+06	2958520	3.14798e+06	3.37743e+06	2812113	3089575	3.43331e+06	0.097496		M+NH4	10.8277	658.591
Lipidomics	Diacylglycerol(alk)	DG(ae-40:5)	1.3972	1.11163e-07	1.51707e+07	2.11964e+07	15536823	15732663	14641593	14737914	15204293	20531678	20719688	21263556	21812336	21654956	17945778	17771740	17818270	16923950	18550850	17813386	0.0419969		M+NH4	10.7701	656.573
Lipidomics	Diacylglycerol(alk)	DG(ae-40:6)	2.41577	3.38355e-06	9.68699e+06	23401508	9910380	10555290	8816672	9472090	9680536	22018478	21720884	24773264	24799438	23695476	16495578	15210803	14996908	15824584	14668904	15090084	0.0396738		M+NH4	10.6432	654.559
Lipidomics	Diacylglycerol(alk)	DG(ae-40:7)	0.940974	0.186695	9.47085e+06	8.91183e+06	8580760	10208134	9756953	9161999	9646422	8.36885e+06	8455867	8874168	9883464	8976797	8675103	9146521	8606325	8610306	8892488	8579694	0.0248919		M+NH4	10.6268	652.544
Lipidomics	Diacylglycerol(alk)	DG(ae-42:5)	1.40801	0.0212677	1.15579e+06	1.62736e+06	1.23954e+06	1.16079e+06	704742	1.17758e+06	1.4963e+06	1.74692e+06	1.3529e+06	1.58109e+06	1.94346e+06	1.51245e+06	1.08465e+06	1.6609e+06	1.39969e+06	1.59215e+06	1.22441e+06	1244470	0.175704		M+NH4	10.899	684.605
Lipidomics	Diacylglycerol(alk)	DG(ae-42:6)	4.17871	2.50957e-07	640922	2.67823e+06	409233	815924	739748	464104	775601	2.51963e+06	2.62917e+06	2.64341e+06	2.79893e+06	2799994	1.13844e+06	1.07383e+06	1.37393e+06	1.43047e+06	1.49441e+06	1.32901e+06	0.117871		M+NH4	10.7993	682.589
Lipidomics	Dihydroceramide	DHC(18:0)	0.433888	0.0222716	725533	314800	677783	891902	878666	388005	791307	457170	418183	0	112385	586261	796948	560145	461074	801788	539274	497868	0.225527		M+Acid	10.3101	567.556
Lipidomics	Dihydroceramide	DHC(22:0)	0.974003	0.805692	580166	565083	486422	522488	505311	699529	687078	639796	571210	431658	560537	622214	499736	802464	562459	660049	616421	615654	0.206237		M+Acid	10.6928	623.62
Lipidomics	Dihydrosphingomyelin	DHSM(14:0)	2.01582	0.0012233	1.02353e+07	2.06325e+07	9013408	11164299	9931556	9968302	11098698	20701210	24813896	15859452	21196906	20590884	13426291	13830357	15180895	14027906	12696395	14105365	0.0732857		M+H	9.57949	676.553
Lipidomics	Dihydrosphingomyelin	DHSM(15:0)	0.652355	0.0404352	79162.3	51641.9	58861.8	65884.1	104574	71594.5	94896.7	53220.1	74744.4	42738.6	33577.4	53928.9	103120	118191	104493	78168.1	90274.5	59961.5	0.218128		M+H	9.72727	690.566
Lipidomics	Dihydrosphingomyelin	DHSM(16:0)	1.50789	0.00140131	4.70125e+06	7.08898e+06	4579947	5077766	4891408	4.18534e+06	4771809	6143410	7.63405e+06	6.29122e+06	7923818	7.45238e+06	5741682	5502472	6.0789e+06	5932226	5.83386e+06	5566638	0.0418555		M+H	9.8718	704.583
Lipidomics	Dihydrosphingomyelin	DHSM(18:0)	0.75468	0.00176387	2.36163e+07	1.78227e+07	21131186	25367970	22780090	24340074	24462008	15793920	17827042	15848343	18632686	21011590	22318832	20858814	21055212	19956644	22561814	19152172	0.0574517		M+H	10.1214	732.614
Lipidomics	Dihydrosphingomyelin	DHSM(20:0)	0.895576	0.146746	1.40019e+07	1.25397e+07	13727530	15844254	11423155	14158400	14855943	13443830	12575433	12384029	13581170	10714137	12656987	14670246	14546082	14609558	12938717	13052648	0.063472		M+H	10.3442	760.644
Lipidomics	Dihydrosphingomyelin	DHSM(21:0)	1.33124	0.354749	267990	356759	282197	521451	200297	102283	233724	442757	466727	146514	387172	340626	224126	277894	284977	265555	465462	311680	0.256199		M+H	10.4464	774.662
Lipidomics	Dihydrosphingomyelin	DHSM(22:0)	0.45867	3.55032e-07	3.93745e+07	18059890	41279108	41037712	39168580	35532644	39854260	18563502	20096894	14893904	18770004	17975146	27003600	25006122	26443998	27691276	29022800	27406554	0.0455432		M+H	10.5339	788.677
Lipidomics	Dolichol	Dolichol-16	175.951	4.85432e-06	98139.5	1.72678e+07	0	0	0	0	490697	18099056	18739226	15525606	17566672	16408217	7554248	6240540	6.84415e+06	7.29945e+06	7.57491e+06	7706451	0.0749723		M+NH4	11.6973	1109.03
Lipidomics	Dolichol	Dolichol-17	17.494	5.26087e-05	5.22495e+06	9.14053e+07	4852591	6678966	6035908	4.12978e+06	4427516	102027280	102382296	76720392	88161296	87735272	33679544	36774100	38942548	38032412	33329614	33192068	0.0682039		M+NH4	11.7782	1177.09
Lipidomics	Dolichol	Dolichol-18	12.1328	0.000145334	1.82408e+07	2.21312e+08	18471414	18913208	18512152	18637402	16670051	241775280	258323568	176251232	226240512	203969824	101233232	93248176	87637408	88970304	95296704	87886304	0.0717175		M+NH4	11.8537	1245.15
Lipidomics	Dolichol	Dolichol-19	10.4139	0.00132273	1.45117e+07	1.51124e+08	14362241	16496522	16151042	11531576	14017362	174996432	193031040	96907512	161928048	128754792	57043396	53092624	52711056	49056836	53102768	53985436	0.067128		M+NH4	11.9244	1313.22
Lipidomics	Dolichol	Dolichol-20	14.3118	0.00471925	1.48094e+06	2.11949e+07	2.50436e+06	2.823e+06	1.22418e+06	120422	732743	27061720	30128796	10779172	22111360	15893471	5.90787e+06	6.36781e+06	5.93006e+06	5884940	6366300	4350820	0.168863		M+NH4	11.9927	1381.28
IonPair	Fatty acyl carnitines	Acylcarnitine(C2:0)	1.1487	0.328787	1.20755e+07	1.38712e+07	1.00158e+07	1.46183e+07	1.44294e+07	8.38278e+06	1.29313e+07	1.54644e+07	1.5529e+07	1.24503e+07	1.61206e+07	9.79154e+06	1.62164e+07	1.25398e+07	1.23e+07	1.21682e+07	6.8697e+06	1.44977e+07	0.253415			1.14
IonPair	Fatty acyl carnitines	Acylcarnitine(C0:0)	1.17552	0.0895909	1.22246e+07	1.43703e+07	1.2678e+07	1.32399e+07	1.34938e+07	1.06284e+07	1.1083e+07	1.37818e+07	1.70035e+07	1.27038e+07	1.60039e+07	1.23583e+07	1.07911e+07	1.10713e+07	1.36896e+07	1.14186e+07	1.17923e+07	1.40685e+07	0.114885			0.98
IonPair	Fatty acyl carnitines	Acylcarnitine(C3:0)	0.88444	0.397233	788220	697133	878208	1.05742e+06	822749	528264	654458	706029	573745	657246	775914	772732	674463	718809	760425	606462	668680	727268	0.0785699			1.89
IonPair	Fatty acyl carnitines	Acylcarnitine(C4:0)	0.855177	0.0260887	2.87175e+06	2.45586e+06	2.68572e+06	3.00458e+06	3.28481e+06	2.81449e+06	2.56917e+06	2.53155e+06	2.51776e+06	2.43983e+06	2.55597e+06	2.23418e+06	2.54208e+06	2.56182e+06	2.88358e+06	2.6951e+06	2.57925e+06	2.45199e+06	0.0577691			4.65
Lipidomics	Fatty acyl carnitines	Acylcarnitine(C5:0)	0.932851	0.312631	2.22997e+06	2.08023e+06	2.56553e+06	2.20698e+06	2.04146e+06	2077693	2.2582e+06	2.11356e+06	1.84246e+06	2.39113e+06	2.18979e+06	1.86423e+06	1.98267e+06	2.04956e+06	2.25445e+06	1.98881e+06	2.00065e+06	2.28252e+06	0.0644562		M+H	2.46311	245.163
Lipidomics	Fatty acyl carnitines	Acylcarnitine(C6:0)	0.710727	0.00875087	1.36046e+06	966919	1.30181e+06	1.71046e+06	1.30182e+06	1.22892e+06	1.25931e+06	1.00978e+06	998842	852831	957690	1.01545e+06	1.12251e+06	1132541	1.14904e+06	1.14224e+06	1.13164e+06	1.18565e+06	0.0194879		M+H	3.02311	259.178
Lipidomics	Fatty acyl carnitines	Acylcarnitine(C7:1)	0.720212	0.577883	11892.5	8565.12	22281.4	0	0	15187.3	21993.7	9048.35	0	13641.7	14118.3	6017.23	55716.1	61065.5	52141.1	65875.4	59253.2	41335.3	0.140554		M+H	2.88022	271.178
Lipidomics	Fatty acyl carnitines	Acylcarnitine(C8:0)	0.817297	0.0989891	1.07184e+06	876013	1.05975e+06	1417586	914994	948756	1018117	962668	953727	732897	854514	876260	959114	902469	841345	1.03129e+06	988456	981305	0.0689761		M+H	4.31305	287.21
Lipidomics	Fatty acyl carnitines	Acylcarnitine(C8:1)	0.747306	0.039695	152138	113694	147307	201651	148337	128785	134612	127885	100120	111849	133382	95234.5	127376	125512	133491	120502	129061	129706	0.0383717		M+H	3.67783	285.194
Lipidomics	Fatty acyl carnitines	Acylcarnitine(C9:1)	0.978537	0.82577	52449.7	51324	61473.4	62231.1	44189.2	45044.5	49310.4	57639.9	45636.4	52975.8	57251.1	43116.7	52406.2	50478.6	50334.6	55003.2	48654.3	52022	0.0390718		M+H	4.29434	299.209
Lipidomics	Fatty acyl carnitines	Acylcarnitine(C10:0)	0.778312	0.163269	2.1589e+06	1.6803e+06	1.93252e+06	3188246	1.72641e+06	1.8136e+06	2.13372e+06	1.84224e+06	2156650	1.43244e+06	1.57846e+06	1.3917e+06	1.91238e+06	1.8863e+06	1745922	1.73828e+06	1.71706e+06	2.21655e+06	0.0921708		M+H	5.44468	315.241
Lipidomics	Fatty acyl carnitines	Acylcarnitine(C10:1)	1.22287	0.133148	493077	602967	487902	687039	461233	396342	432868	708683	641274	478728	646400	539750	553913	540631	525799	532065	488107	521290	0.048516		M+H	4.98214	313.225
Lipidomics	Fatty acyl carnitines	Acylcarnitine(C12:0)	0.920874	0.179792	1.19626e+07	1.10161e+07	12554356	13685934	10992919	10837898	11742062	11657242	11640259	10751515	11263581	9767799	12343566	12091136	11634281	11647618	11554962	11106870	0.0412357		M+H	6.24261	343.272
Lipidomics	Fatty acyl carnitines	Acylcarnitine(C12:1)	0.947351	0.503745	1.43994e+06	1.36412e+06	1.36003e+06	1.79532e+06	1.25252e+06	1.3204e+06	1.47141e+06	1.44816e+06	1.46836e+06	1.23766e+06	1394023	1.27241e+06	1.55598e+06	1.49816e+06	1.38524e+06	1.36696e+06	1.41514e+06	1.37056e+06	0.0579573		M+H	5.82257	341.256
Lipidomics	Fatty acyl carnitines	Acylcarnitine(C13:0)	1.00129	0.992229	1.78829e+06	1.7906e+06	2.41956e+06	1.99345e+06	1451370	1.34167e+06	1735412	1.54519e+06	1.76183e+06	1.95891e+06	2.15173e+06	1.53533e+06	1.67002e+06	1.71738e+06	1.70093e+06	1.73559e+06	1.7548e+06	1675707	0.0211772		M+H	6.46441	357.287
Lipidomics	Fatty acyl carnitines	Acylcarnitine(C13:1)	1.57978	0.000763234	347572	549087	433258	372852	282998	286287	362466	552816	485886	581250	623606	501879	457992	450805	441156	465792	464953	452246	0.0260429		M+H	6.20335	355.272
Lipidomics	Fatty acyl carnitines	Acylcarnitine(C14:0)	0.931007	0.225645	8.82736e+07	82183360	97076936	97705944	85616064	78319800	82649400	87480656	83306192	80816464	85435496	73877992	81951184	86223776	81733992	85123584	86634752	86302888	0.0271193		M+H	6.91871	371.303
Lipidomics	Fatty acyl carnitines	Acylcarnitine(C14:1)	0.907064	0.32574	1.41418e+07	1.28275e+07	15431748	17199038	13018925	11877359	13182079	15090856	14362244	11000817	12247240	11436582	13876842	13614342	13175369	13302765	13151764	12964245	0.026272		M+H	6.56987	369.288
Lipidomics	Fatty acyl carnitines	Acylcarnitine(C14:2)	0.712869	0.0416242	3.74519e+06	2.66983e+06	4112481	5018438	3.30272e+06	2925126	3.3672e+06	3.10085e+06	2.84609e+06	2.25078e+06	2832720	2.31871e+06	2.93207e+06	3.03264e+06	3.05474e+06	3.10896e+06	3021761	3.13563e+06	0.0216412		M+H	6.18635	367.272
Lipidomics	Fatty acyl carnitines	Acylcarnitine(C15:0)	0.783759	0.115282	3.83972e+06	3.00942e+06	4466526	5048664	3474674	2.84612e+06	3362631	3.3688e+06	3.34811e+06	2.59739e+06	3324933	2.40786e+06	3.36506e+06	3512706	3.31235e+06	3.406e+06	3.45647e+06	3348044	0.0204545		M+H	7.22318	385.319
Lipidomics	Fatty acyl carnitines	Acylcarnitine(C15:1)	1.01442	0.90848	705379	715549	852689	863145	647575	487896	675590	852246	796113	678731	674894	575760	645892	614851	688333	684987	677434	685602	0.0457168		M+H	6.88666	383.303
Lipidomics	Fatty acyl carnitines	Acylcarnitine(C16:0)	0.920091	0.389493	2.24075e+08	2.06169e+08	242990592	278375552	204708528	188961344	205338016	223618880	228241200	175166704	218686624	185132256	208081712	211404464	207812960	215614544	219182528	215877120	0.0205857		M+H	7.52026	399.335
Lipidomics	Fatty acyl carnitines	Acylcarnitine(C16:1)	1.04633	0.523889	5.9755e+07	6.25233e+07	63450404	71894288	56868124	51320928	55241424	66586280	67541656	60630784	60280804	57577160	58524876	59368828	58318928	59704832	60313516	60357892	0.0134275		M+H	7.13589	397.319
Lipidomics	Fatty acyl carnitines	Acylcarnitine(C17:0)	0.783834	0.296182	2.48756e+06	1.94984e+06	2.17203e+06	3826544	1.89394e+06	2.04872e+06	2.49657e+06	2.37669e+06	2.6098e+06	804910	2.3398e+06	1.61798e+06	2.58959e+06	2.28986e+06	2495949	2.4598e+06	2142451	2.24815e+06	0.0979741		M+H	7.77455	413.35
Lipidomics	Fatty acyl carnitines	Acylcarnitine(C17:1)	1.2648	0.0891138	2.69064e+06	3.40312e+06	2.99105e+06	3.35253e+06	2.42634e+06	2191711	2.49156e+06	4.06652e+06	3863705	2523695	3663147	2898525	2.93522e+06	2920448	3017986	3.00729e+06	3.24509e+06	3128012	0.0378359		M+H	7.41634	411.335
Lipidomics	Fatty acyl carnitines	Acylcarnitine(C18:0)	0.845051	0.110473	9.027e+07	7.62827e+07	96950928	113102856	87135984	75997368	78162640	82522056	78425440	70150456	79049656	71265944	76441152	80500152	79363136	82055440	81832224	79341080	0.0245055		M+H	8.04375	427.366
Lipidomics	Fatty acyl carnitines	Acylcarnitine(C18:1)	1.02447	0.827309	1.58885e+08	1.62773e+08	168289696	191722080	139662400	139745984	155002944	187915936	192007648	114505248	168392768	151042864	161313376	161827664	160232640	162777056	161666288	159649808	0.0145618		M+H	7.66823	425.35
Lipidomics	Fatty acyl carnitines	Acylcarnitine(C18:2)	0.730173	0.0232314	9.61452e+07	7.02027e+07	106452384	119751984	83189416	79639072	91693376	71601344	73898480	65034928	75243608	65235136	80289232	80054688	81876144	84422568	83537400	83224704	0.022719		M+H	7.34053	423.334
Lipidomics	Fatty acyl carnitines	Acylcarnitine(C18:3)	0.538229	0.010341	10808229	5.8173e+06	11490281	14968144	8960577	8951961	9670182	5872204	6425571	5108159	6.36922e+06	5.31137e+06	8.02777e+06	7.96508e+06	8157313	8179525	8.08342e+06	8114499	0.00913381		M+H	7.0507	421.319
Lipidomics	Fatty acyl carnitines	Acylcarnitine(C19:1)	1.74014	0.0030323	800477	1.39294e+06	895845	990919	703712	657407	754501	1.56159e+06	1.5351e+06	1.01353e+06	1.58527e+06	1.26922e+06	1.11702e+06	1.18503e+06	1.1966e+06	1.14125e+06	1.08288e+06	1.02378e+06	0.0604542		M+H	7.92509	439.365
Lipidomics	Fatty acyl carnitines	Acylcarnitine(C20:0)	1.19503	0.120931	2.40807e+06	2.87771e+06	2.53159e+06	2.75203e+06	2.47719e+06	2163917	2.1156e+06	3715399	2.99012e+06	2430715	2509992	2.74232e+06	2.33216e+06	2469189	2562974	2.69717e+06	2.61266e+06	2.47349e+06	0.0465779		M+H	8.50255	455.397
Lipidomics	Fatty acyl carnitines	Acylcarnitine(C20:1)	1.0809	0.440519	1.38129e+07	1.49304e+07	14699539	17228808	13005497	11272213	12858526	16744206	16211337	11588845	15857633	14249793	13990700	14074784	14250155	13916648	13707699	14475845	0.0204186		M+H	8.1479	453.382
Lipidomics	Fatty acyl carnitines	Acylcarnitine(C20:2)	0.657935	0.0952411	2.89735e+06	1.90627e+06	2172333	4.61715e+06	2.59113e+06	2381819	2.72431e+06	2250678	1.90086e+06	958113	2.34982e+06	2071875	2.28196e+06	2.40447e+06	2615537	2.47531e+06	2.44753e+06	2388487	0.0595442		M+H	7.85335	451.366
Lipidomics	Fatty acyl carnitines	Acylcarnitine(C20:3)	0.76662	0.0820247	2.90691e+06	2.22849e+06	2331912	4.02584e+06	2.69157e+06	2.63165e+06	2853564	2257961	2432438	1.76601e+06	2502044	2184021	2775341	2.63034e+06	2.7041e+06	2.80053e+06	2.54551e+06	2.61957e+06	0.0355655		M+H	7.58032	449.35
Lipidomics	Fatty acyl carnitines	Acylcarnitine(C20:4)	1.06302	0.508477	3.58928e+07	3.81549e+07	31025442	42748496	40065248	30079294	35545408	37537268	36046384	46144192	33432688	37613964	34111316	34568212	35963452	37086884	37868416	37154628	0.0398348		M+H	7.38356	447.334
Lipidomics	Fatty acyl carnitines	Acylcarnitine(C20:5)	0.62393	0.00221058	15334825	9.56786e+06	16268678	18848896	14037857	14085040	13433654	7804527	8772506	11798488	11056607	8407190	11951652	11888090	11787056	12136886	12227439	12647986	0.0239478		M+H	7.07119	445.319
Lipidomics	Fatty acyl carnitines	Acylcarnitine(C22:1)	1.40727	0.0137569	351773	495040	309175	363529	336968	341964	407229	566840	448641	415752	599558	444406	347969	476801	400373	479471	468869	402449	0.129897		M+H	8.56958	481.413
Lipidomics	Fatty acyl carnitines	Acylcarnitine(C22:5)	0.484628	0.000292383	1.18366e+06	573633	1.00319e+06	1.43311e+06	1.0614e+06	1.16036e+06	1.26022e+06	417721	713928	501189	711257	524069	913701	735112	774921	908816	976014	821072	0.133648		M+H	7.54816	473.35
Lipidomics	Fatty acyl carnitines	Acylcarnitine(C22:6)	0.685969	0.000403492	3.76278e+06	2.58115e+06	4327473	3689935	3.6134e+06	3.48629e+06	3.69678e+06	2.3728e+06	2.41114e+06	2.9104e+06	2.93652e+06	2.27488e+06	2934274	2.98459e+06	3.09984e+06	3054726	3.15672e+06	3.20467e+06	0.0306316		M+H	7.37668	471.335
Lipidomics	Fatty acyl carnitines (OH)	Acylcarnitine(C8:0-OH)	0.628685	0.0256311	89607.9	56335.1	70590.7	114715	78161.3	81853.2	102719	60289.9	58186	22136.3	69169.4	71894	90149.6	84864	77221.3	63127.3	74929.1	77857.7	0.113309		M+H	3.30063	303.205
Lipidomics	Fatty acyl carnitines (OH)	Acylcarnitine(C10:0-OH)	0.771326	0.205934	198183	152864	144182	290421	161930	166652	227730	174630	168907	84061.4	185230	151490	215215	186489	193314	196268	182521	179170	0.0704698		M+H	4.67949	331.236
Lipidomics	Fatty acyl carnitines (OH)	Acylcarnitine(C12:0-OH)	0.904313	0.440121	557603	504248	465356	712343	523014	467611	619693	586372	595878	344889	494187	499913	576549	553789	523599	528003	503384	556908	0.0566404		M+H	5.72039	359.267
Lipidomics	Fatty acyl carnitines (OH)	Acylcarnitine(C12:1-OH)	0.684855	0.098026	88045.4	60298.3	86501.3	134580	69559.7	69586.6	79999.6	70496.4	74078.3	28818.2	64473.1	63625.4	70889.2	59305.1	88314.9	82439.2	63082.2	65702.2	0.150003		M+H	5.23609	357.251
Lipidomics	Fatty acyl carnitines (OH)	Acylcarnitine(C14:0-OH)	0.716401	0.0248708	1.41838e+06	1.01613e+06	1.36008e+06	1.87682e+06	1.2901e+06	1.20541e+06	1.3595e+06	1.1699e+06	1.13127e+06	735146	1.03284e+06	1.0115e+06	1.27902e+06	1227878	1.26536e+06	1.25879e+06	1250815	1.21265e+06	0.0306814		M+H	6.45665	387.298
Lipidomics	Fatty acyl carnitines (OH)	Acylcarnitine(C14:1-OH)	0.862509	0.396548	923754	796746	926786	1.28161e+06	822468	699774	888127	1.05924e+06	936463	448222	790611	749188	963871	949822	873490	909422	871018	893324	0.0451407		M+H	6.14777	385.282
Lipidomics	Fatty acyl carnitines (OH)	Acylcarnitine(C14:2-OH)	0.757971	0.139543	680533	515824	590051	950626	587019	531618	743350	674754	489535	306704	631282	476846	604710	612338	629167	624100	634201	542034	0.0796661		M+H	5.75395	383.267
Lipidomics	Fatty acyl carnitines (OH)	Acylcarnitine(C16:0-OH)	0.741719	0.0361158	2.36732e+06	1.75589e+06	2.14283e+06	3.11551e+06	2.30746e+06	1.92923e+06	2.34156e+06	1.90484e+06	1897574	1.31521e+06	1.76859e+06	1.89322e+06	2.04318e+06	2.1291e+06	2.03757e+06	2.16712e+06	2.10528e+06	2.09976e+06	0.0248215		M+H	7.10291	415.329
Lipidomics	Fatty acyl carnitines (OH)	Acylcarnitine(C16:1-OH)	1.01157	0.92261	1.56423e+06	1.58233e+06	1.52817e+06	2.07541e+06	1366192	1.3057e+06	1.54568e+06	1.86119e+06	1.68798e+06	1.15302e+06	1.66923e+06	1.54025e+06	1.6093e+06	1.62915e+06	1.61264e+06	1.59524e+06	1648122	1.56322e+06	0.0288418		M+H	6.73259	413.313
Lipidomics	Fatty acyl carnitines (OH)	Acylcarnitine(C16:2-OH)	0.669242	0.020407	958632	641557	1.03435e+06	1.25504e+06	845791	742960	915012	816510	673754	467064	694925	555531	837230	846066	790866	792738	772299	790438	0.0376853		M+H	6.38919	411.298
Lipidomics	Fatty acyl carnitines (OH)	Acylcarnitine(C18:1-OH)	1.10471	0.502655	3.14184e+06	3.47082e+06	2831773	4077483	3.04182e+06	2.64296e+06	3.11516e+06	4214446	4027814	1.98526e+06	3.56543e+06	3561147	3.31134e+06	3.28593e+06	3.41294e+06	3.433e+06	3.45834e+06	3496744	0.0257355		M+H	7.30508	441.345
Lipidomics	Fatty acyl carnitines (OH)	Acylcarnitine(C18:2-OH)	0.766513	0.144061	2.49321e+06	1.91107e+06	2.47271e+06	3.53713e+06	2.09486e+06	1.75684e+06	2.6045e+06	2.21599e+06	2.05559e+06	1.26794e+06	2.25069e+06	1.76516e+06	2.2332e+06	2.24351e+06	2.35753e+06	2214881	2.22361e+06	2.34759e+06	0.0274308		M+H	6.96607	439.329
Lipidomics	Fatty acyl carnitines (OH)	Acylcarnitine(C18:3-OH)	0.545062	0.0212568	427214	232858	435451	622828	347190	297334	433270	280563	280246	168081	214067	221335	341398	336682	342134	329194	252836	270651	0.117045		M+H	6.74556	437.314
Lipidomics	Fatty acyl carnitines (OH)	Acylcarnitine(C20:2-OH)	0.638855	0.161643	323576	206718	318861	458901	232439	243179	364501	280478	334899	0	287176	131039	293566	273210	221529	249709	251160	247724	0.147349		M+H	7.49433	467.36
Lipidomics	Fatty acyl CoAs	AcylCoA(C16:0)	0.91083	0.443905	991806	903366	1.07941e+06	835818	946229	1143500	954068	1.10363e+06	1.04889e+06	637629	1.00717e+06	719519	873132	1022026	808035	852355	851241	911408	0.0813886		M+H	7.26143	1005.34
Lipidomics	Free fatty acid	FFA(C14:0)	1.04925	0.422093	5.39127e+06	5.65678e+06	5708571	5626260	5.44352e+06	4984505	5.19349e+06	5.05646e+06	5315497	6.62596e+06	5.87842e+06	5407563	5490083	5526469	5.90657e+06	6135515	6.09807e+06	6209885	0.0522494		M-H	7.85113	228.209
Lipidomics	Free fatty acid	FFA(C14:1)	0.837034	0.122047	311144	260438	343421	391846	295299	251368	273785	276313	262389	216206	285093	262190	258365	289053	279328	305443	322472	282921	0.0739438		M-H	7.52708	226.194
Lipidomics	Free fatty acid	FFA(C14:2)	0.480691	0.00381806	156495	75225.8	174487	207845	134426	117786	147931	69321.5	64321.1	58899.2	107025	76562.1	113987	118971	128794	128369	114346	123656	0.0734569		M-H	7.16189	224.178
Lipidomics	Free fatty acid	FFA(C16:0)	0.910619	0.13382	1.18921e+08	108292024	113856648	137688544	119969440	103893824	119198416	101745728	102161608	111745424	113631616	112175744	117910976	113335352	116375552	116300736	118593664	114388440	0.0158431		M-H	8.35906	256.24
Lipidomics	Free fatty acid	FFA(C16:1)	1.11559	0.0273083	9.23602e+06	1.03036e+07	8862706	9981200	8695946	9179671	9460584	9519010	9631596	11138042	10528729	10700564	9749668	10071646	10234570	10163441	10660690	10772462	0.0387748		M-H	8.0073	254.225
Lipidomics	Free fatty acid	FFA(C16:2)	0.667212	0.0338177	274662	183258	269348	380974	250676	200518	271793	175886	175477	181779	215325	167821	242142	240093	242739	255811	242592	201908	0.0819715		M-H	7.69674	252.209
Lipidomics	Free fatty acid	FFA(C17:0)	0.98785	0.917675	3.22178e+06	3.18264e+06	3.75542e+06	3.3393e+06	2786302	2.92898e+06	3.2989e+06	2.56773e+06	2897028	4.41743e+06	3.11684e+06	2.91415e+06	2.7008e+06	2.96099e+06	3.26426e+06	3166656	3.35021e+06	3451590	0.0897976		M-H	8.57448	270.256
Lipidomics	Free fatty acid	FFA(C17:1)	1.19343	0.306259	750617	895807	875263	878865	268061	789752	941143	947603	840510	847480	929203	914240	913555	920629	793014	778223	758178	899192	0.0821637		M-H	8.25087	268.24
Lipidomics	Free fatty acid	FFA(C18:0)	0.908459	0.076528	249754496	2.26892e+08	269875136	251200704	254014816	225893248	247788576	210623200	211700192	258510176	228622848	225002000	233711872	239548672	251621408	261012912	247349344	262631600	0.0486293		M-H	8.79841	284.272
Lipidomics	Free fatty acid	FFA(C18:1)	0.955132	0.0767936	1.63097e+08	1.55779e+08	165954768	171353072	157650672	154345184	166180096	156195904	153829232	154022368	159964448	154883056	154173856	151709088	168485648	168329088	169640592	169001856	0.0521856		M-H	8.47884	282.256
Lipidomics	Free fatty acid	FFA(C18:2)	0.848841	0.0433319	1.56347e+07	1.32713e+07	16874978	16912178	12830306	14642108	16913732	12612864	13155486	14053247	14239634	12295455	14017488	13782084	14405493	14308453	14717371	14323355	0.0266994		M-H	8.19165	280.241
Lipidomics	Free fatty acid	FFA(C18:3)	0.679836	0.00370343	1.13885e+06	774231	1154158	1.30005e+06	905316	1.22988e+06	1104846	696667	772048	844124	798123	760194	981841	957176	941417	983765	1.02737e+06	1.02186e+06	0.034161		M-H	7.92206	278.225
Lipidomics	Free fatty acid	FFA(C20:1)	0.972974	0.55109	10478185	1.0195e+07	11469282	11445318	9871083	9394471	10210771	9727444	10194203	10232400	10597141	10223818	10060568	10139497	10325869	10426079	10756202	10756425	0.0278023		M-H	8.87148	310.287
Lipidomics	Free fatty acid	FFA(C20:2)	0.899621	0.0913599	3.20531e+06	2.88356e+06	3.48848e+06	3.30287e+06	3.17144e+06	2.68583e+06	3.37792e+06	2.8439e+06	2610653	3.10829e+06	2.98943e+06	2.86553e+06	3.14462e+06	3094879	2.98602e+06	3.03206e+06	3.26486e+06	2.76284e+06	0.0522112		M-H	8.62058	308.272
Lipidomics	Free fatty acid	FFA(C20:3)	0.839118	0.00657592	1.20897e+07	10144642	11452821	13570214	11802922	11289332	12332962	9304837	9681740	9943616	10733209	11059808	11390881	11018475	11268530	10987566	11630002	11437865	0.0204672		M-H	8.36878	306.255
Lipidomics	Free fatty acid	FFA(C20:4)	0.889152	0.0320701	424558016	377496672	407964480	406480320	414918848	408881088	484545344	356584832	382995008	389520608	379904992	378477920	379216960	382633824	396770112	392998784	417913152	400834432	0.036114		M-H	8.17602	304.24
Lipidomics	Free fatty acid	FFA(C20:5)	0.972173	0.835952	2.51834e+06	2.44827e+06	2.58303e+06	2.73076e+06	2.1999e+06	2600610	2.47742e+06	1.63397e+06	2.05046e+06	3.42206e+06	2.78202e+06	2.35282e+06	2568012	2736426	2.5537e+06	2637444	2.7426e+06	2.71068e+06	0.0374143		M-H	7.91961	302.225
Lipidomics	Free fatty acid	FFA(C22:3)	0.969358	0.712419	222174	215366	228686	248443	186168	211716	235854	186842	263307	199501	231276	195902	243857	225640	181368	222712	249395	230192	0.101536		M-H	8.77732	334.287
Lipidomics	Free fatty acid	FFA(C22:4)	1.22644	0.0222624	6.60595e+06	8.10183e+06	7.01524e+06	6347057	6.37092e+06	6054405	7242126	7173350	7.13775e+06	8486330	8.26539e+06	9446322	5978338	7.20701e+06	7762526	9043772	8669054	8840814	0.144391		M-H	8.54542	332.271
Lipidomics	Free fatty acid	FFA(C22:5)	0.935248	0.378432	4.26507e+06	3.9889e+06	4.25929e+06	4718238	3.89032e+06	4.18527e+06	4.27224e+06	3139234	3.74354e+06	4671932	4.17782e+06	4211970	4.31295e+06	4.10232e+06	4391893	4205966	4.46763e+06	4.45621e+06	0.0322237		M-H	8.32295	330.256
Lipidomics	Free fatty acid	FFA(C22:6)	0.908947	0.0168912	8.2771e+07	7.52344e+07	88209344	85610248	77348768	79616968	83069656	71538368	72615648	75663712	79887744	76466600	83235824	82098976	78351880	76371872	79950152	77924440	0.0343937		M-H	8.13054	328.24
Lipidomics	Free fatty acid	FFA(C24:4)	0.683989	0.0145434	599770	410236	582163	684702	436229	632139	663616	492103	322126	326756	386161	524033	575052	534035	516288	584286	564980	584668	0.0538071		M-H	8.90119	360.302
Lipidomics	Free fatty acid	FFA(C24:6)	0.976489	0.828163	515190	503078	577379	468929	492585	454921	582136	405243	401000	541430	519513	648202	442297	522805	638131	546786	692604	708955	0.207723		M-H	8.50369	356.271
Lipidomics	GD1 Ganglioside	GD1(16:0)	0.639773	1.26809e-05	2.24383e+08	1.43554e+08	211251264	229904128	237216784	216410512	227131824	159727920	148197456	121465864	140248896	148130240	191965344	187334256	182865296	182722144	180654128	178376560	0.0338706		(M-2H)/2	8.38082	1808.94
Lipidomics	GD1 Ganglioside	GD1(16:1)	0.404035	4.04836e-05	2745572	1.10931e+06	3.00573e+06	3.1903e+06	2385953	2609757	2536116	1.40495e+06	1.42584e+06	984038	917370	814339	2.70754e+06	1.93361e+06	2393089	2.36809e+06	2.14095e+06	2.05762e+06	0.114807		(M-2H)/2	8.21098	1806.92
Lipidomics	GD1 Ganglioside	GD1(17:0)	0.643559	0.000196311	3.61787e+07	23283120	34552356	39542340	36237268	34544508	36016992	26156362	23975384	17736916	25468468	23078470	32147678	32108872	30146644	29366076	28236078	27050682	0.0727153		(M-2H)/2	8.50093	1822.96
Lipidomics	GD1 Ganglioside	GD1(18:0)	0.707023	0.00161737	5995597520	4239024630	5637024800	6543745500	6479933400	5507693600	5809590300	4970931200	4402602500	3184207100	4246109950	4391272400	5415027700	5317970400	5145422800	4939519000	4936671700	4722741800	0.0582792		(M-2H)/2	8.59666	1836.97
Lipidomics	GD1 Ganglioside	GD1(18:1)	0.621699	4.17171e-06	1560775244	970332508	1514185340	1642789890	1576272640	1507100670	1563527680	1042184900	984949380	828509060	970004930	1026014270	1271076860	1237251840	1277348860	1274096130	1273418110	1233460740	0.0148908		(M-2H)/2	8.46217	1834.95
Lipidomics	GD1 Ganglioside	GD1(19:0)	0.905136	0.486964	42298160	3.82856e+07	38922236	48863756	44321544	38900312	40482952	52267052	43100268	21931076	39544592	34584968	47691924	40022280	37182572	34744836	37153980	32056486	0.150726		(M-2H)/2	8.7569	1850.98
Lipidomics	GD1 Ganglioside	GD1(19:1)	1.01518	0.916483	3.9742e+06	4.03451e+06	4667432	3326073	3.3484e+06	3.2114e+06	5317673	3.95647e+06	3.84692e+06	4.5311e+06	2868851	4.96923e+06	3.1311e+06	3452904	2.56571e+06	3.9276e+06	4.33832e+06	5244586	0.246417		(M-2H)/2	8.54466	1848.96
Lipidomics	GD1 Ganglioside	GD1(20:0)	0.832819	0.128639	965174310	8.03816e+08	962402560	1053141250	1046397310	871794240	892136190	982554620	828162370	496135936	895104770	817120580	953537020	892697220	865789700	839880190	844804670	843265470	0.0491808		(M-2H)/2	8.86069	1865
Lipidomics	GD1 Ganglioside	GD1(20:1)	0.736064	0.000165629	2.34323e+08	1.72477e+08	234740224	238610400	240895104	215202528	242166000	189218704	168395840	147939664	174352960	182476144	208819280	197570144	202340944	210121008	204567200	201717840	0.0258046		(M-2H)/2	8.72032	1862.98
Lipidomics	GD1 Ganglioside	GD1(21:0)	1.57305	0.0779953	6.23773e+06	9.81224e+06	4.94923e+06	8158760	7985231	5612347	4483098	12513838	8884851	5.00994e+06	13443795	9208768	10126872	7.81318e+06	8.2805e+06	6263164	7.99449e+06	5.83069e+06	0.181947		(M-2H)/2	8.94138	1879.02
Lipidomics	GD1 Ganglioside	GD1(21:1)	1.39359	0.000104613	8068886	1.12447e+07	9188574	7.55883e+06	7.20521e+06	8290517	8101295	11280921	11070173	11560298	11925070	10387129	8267409	9132024	9130604	8867343	9746017	9215552	0.0542679		(M-2H)/2	8.83328	1877
Lipidomics	GD1 Ganglioside	GD1(22:0)	1.21194	0.420517	6.17378e+06	7.48224e+06	6.79801e+06	7.29178e+06	6646687	5038453	5.09395e+06	10838944	8546669	2.38121e+06	8626949	7017434	8696512	6431692	5859898	6613089	5039893	7111620	0.182771		(M-2H)/2	9.01145	1893.03
Lipidomics	GD1 Ganglioside	GD1(22:1)	0.953898	0.449114	3.0849e+07	2.94268e+07	31187990	31379674	30801772	28407708	32468000	32818734	32959744	24338072	28785228	28232344	32669286	31177152	31011162	32591090	31803914	31600446	0.0219674		(M-2H)/2	8.9099	1891.01
Lipidomics	GD1 Ganglioside	GD1(22:2)	0.46546	0.00176318	1.53092e+06	712584	1.47554e+06	1.83181e+06	1.37609e+06	1.387e+06	1.58418e+06	1.04289e+06	1.01714e+06	450030	673670	379191	1.33753e+06	961555	990084	1.07276e+06	1.17793e+06	1.09928e+06	0.141423		(M-2H)/2	8.75278	1889
Lipidomics	GD1 Ganglioside	GD1(23:1)	1.8888	0.00248691	3.17149e+06	5.99031e+06	3381587	3.38146e+06	3113807	3.21901e+06	2761590	7140640	6530018	4464553	5.69358e+06	6122741	5.24244e+06	5.08696e+06	4516822	4192480	4265865	4.79101e+06	0.0931172		(M-2H)/2	8.96716	1905.03
Lipidomics	GD1 Ganglioside	GD1(23:2)	2.04316	0.00226596	617619	1.26189e+06	829209	350786	349004	865590	693507	1.08088e+06	1468343	1.28588e+06	1.04994e+06	1.42443e+06	1073615	1.05628e+06	971671	998678	908211	1.05388e+06	0.0574331		(M-2H)/2	8.85778	1903.01
Lipidomics	GD1 Ganglioside	GD1(24:1)	1.28027	0.0520428	1.08606e+07	13904483	9233691	12632585	10945424	12480666	9010586	17110728	14976157	10640258	13485608	13309664	13471243	13103518	12765155	11834145	12184009	11155439	0.0709756		(M-2H)/2	9.03406	1919.04
Lipidomics	GD1 Ganglioside	GD1(24:2)	0.810555	0.00813846	1.18917e+07	9.63884e+06	12911363	11461593	11446517	12701592	10937224	11029252	8994666	8142282	9757176	10270831	11383374	10273286	11271632	9926481	11111328	9687997	0.0699087		(M-2H)/2	8.93711	1917.03
Lipidomics	GD1 Ganglioside	GD1(24:3)	0.473009	0.000175578	2.1989e+06	1040099	1978133	2.17993e+06	2.58883e+06	2.30705e+06	1.94055e+06	1.08445e+06	1.12432e+06	838075	1.0519e+06	1.10175e+06	1.46553e+06	1.34888e+06	1.71254e+06	962126	1.55932e+06	1.79987e+06	0.191526		(M-2H)/2	8.82665	1915.01
Lipidomics	GD1-NeuGc Ganglioside	GD1-NeuGc(16:0)	0.3403	1.36491e-05	465002	158240	420273	495416	531794	440277	437251	133845	146899	144400	113569	252488	267344	205006	258314	267704	248374	175142	0.18534		(M-2H)/2	8.40698	1840.93
Lipidomics	GD2 Ganglioside	GD2(18:0)	1.09301	0.327579	4.12526e+06	4.50895e+06	4572237	4.1216e+06	4453782	3633790	3.84488e+06	5016933	4.44474e+06	3.89977e+06	5.41008e+06	3.77322e+06	4267238	4277968	3.82329e+06	4293902	4090420	3.37315e+06	0.0939647		(M-2H)/2	8.60328	1674.92
Lipidomics	GD2 Ganglioside	GD2(18:1)	0.849796	0.19194	1.16434e+06	989454	1.23608e+06	1.31706e+06	801508	1.15745e+06	1.30961e+06	882846	888496	827373	1.14933e+06	1199226	993782	1159143	985252	1.10003e+06	783597	1.07546e+06	0.118733		(M-2H)/2	8.45809	1672.9
Lipidomics	GD3 Ganglioside	GD3(18:0)	0.675085	0.000327277	1.20739e+08	8.15091e+07	113788536	127556608	130722416	115790712	115836832	96058776	83538840	65510112	85015312	77422256	118124120	102018040	96778040	92713496	96408016	86634528	0.117174		(M-2H)/2	8.75761	1471.84
Lipidomics	Glc/Gal-ceramide	Hex-Cer(16:0)	1.02386	0.862264	4.60954e+06	4.71953e+06	5.01153e+06	4382290	4526044	4695707	4.43213e+06	4.61351e+06	5282753	5.12565e+06	6021440	2.5543e+06	5205719	5398436	4.81249e+06	5082903	4993407	5413357	0.0451993		M+Acid	9.80598	699.563
Lipidomics	Glc/Gal-ceramide	Hex-Cer(18:0)	0.926132	0.0688552	2.29934e+07	2.12949e+07	23842700	25204750	21707674	22719202	21492472	21641464	21188228	21886898	21293508	20464378	24166374	23833052	23685578	22036192	21535444	22473634	0.0583108		M+Acid	10.0537	727.594
Lipidomics	Glc/Gal-ceramide	Hex-Cer(18:1)	1.98758	1.02677e-06	4.14587e+06	8.24024e+06	3982030	3.99845e+06	4.03109e+06	4393078	4324679	7888621	8427354	7745450	8526468	8613285	6397315	7.28563e+06	6304115	6228492	6.53304e+06	7012651	0.0595443		M+Acid	9.87496	725.578
Lipidomics	Glc/Gal-ceramide	Hex-Cer(20:0)	5.35743	0.000281471	595311	3.18934e+06	979211	0	1.10239e+06	0	894957	4.1612e+06	3516001	2.77611e+06	3231780	2.26162e+06	2.14917e+06	1.74254e+06	1.38214e+06	1658281	1.59344e+06	1.49974e+06	0.147423		M+Acid	10.2876	755.625
Lipidomics	Glc/Gal-ceramide	Hex-Cer(21:0)	9.21293	0.000201778	712296	6.56233e+06	1.02823e+06	1.03091e+06	485004	1.01734e+06	0	7238994	7097375	4281901	7246843	6946551	5323605	3733896	3736311	4.16206e+06	3.83282e+06	3.40108e+06	0.154202		M+Acid	10.3927	769.641
Lipidomics	Glc/Gal-ceramide	Hex-Cer(22:0)	0.748297	0.00356132	9.67023e+07	72362036	96286824	100570656	99049744	90074536	97529904	83215096	72194664	65869064	81188008	59343348	94219952	88935664	84106824	86894976	83953192	84150448	0.0484207		M+Acid	10.4788	783.657
Lipidomics	Glc/Gal-ceramide	Hex-Cer(22:1)	2.43866	2.14449e-06	15020905	3.66308e+07	17029280	15008478	14404566	12942414	15719787	36435020	37906444	38972116	37618248	32222364	27226486	26476846	26282058	25613300	27155666	27358380	0.0370034		M+Acid	10.3288	781.641
Lipidomics	Glc/Gal-ceramide	Hex-Cer(23:0)	1.7327	0.000564418	124048176	2.14939e+08	123107064	128745336	124489320	123777400	120121760	221652480	229100224	189201200	238370992	196368576	190920272	178488720	179837184	171905872	174454512	182764080	0.0341331		M+Acid	10.5704	797.673
Lipidomics	Glc/Gal-ceramide	Hex-Cer(23:1)	3.63381	1.01384e-10	4.02388e+07	1.4622e+08	42865832	40448580	37467488	40206404	40205512	143602944	150838384	147776896	144251904	144630800	94268136	95128608	99534872	95137928	96308904	98656048	0.025218		M+Acid	10.4095	795.657
Lipidomics	Glc/Gal-ceramide	Hex-Cer(24:0)	0.54552	5.83372e-07	796571024	4.34545e+08	793715780	823702020	835761280	764185540	765490500	461992608	445754176	383283040	481926080	399770848	693817410	669863620	645918720	646730880	647043070	657252100	0.0269361		M+Acid	10.6641	811.688
Lipidomics	Glc/Gal-ceramide	Hex-Cer(24:1)	1.33311	2.42232e-08	2210746494	2947167794	2214907390	2247895550	2207288060	2144626300	2239015170	2957262590	2981489920	3013028350	2887405570	2896652540	2700683260	2649118210	2652849150	2670592510	2626889470	2593053180	0.0206743		M+Acid	10.4999	809.673
Lipidomics	Glc/Gal-ceramide	Hex-Cer(24:2)	2.24465	1.50003e-07	60234472	1.35206e+08	64645512	62561560	59461920	57555808	56947560	125688616	138501760	139650384	133466208	138720896	95402624	99644696	97770704	104059664	103639552	99407648	0.0351475		M+Acid	10.3659	807.656
Lipidomics	Glc/Gal-ceramide	Hex-Cer(25:0)	0.842023	0.0319719	3.63406e+07	3.05996e+07	36566372	36584176	39660576	35361640	33530370	32087444	31607946	24831768	35769256	28701760	37680876	37231204	36310048	33972708	35235068	36469884	0.0348862		M+Acid	10.7377	825.704
Lipidomics	Glc/Gal-ceramide	Hex-Cer(25:1)	3.06069	1.32279e-11	1.22438e+08	3.74744e+08	126083232	127486720	115269248	122014512	121334960	378024736	380579712	373754976	363881824	377481216	269420224	266850880	260056736	253991344	254854624	253744224	0.0257468		M+Acid	10.5834	823.687
Lipidomics	Glc/Gal-ceramide	Hex-Cer(25:2)	7.09859	1.12313e-05	928508	6591099	1.2075e+06	0	1266799	41016.1	2127227	6.78459e+06	6.63646e+06	7.56781e+06	5.01538e+06	6951254	4.42607e+06	3784417	4.74928e+06	3.7426e+06	4.24586e+06	4.5667e+06	0.0918822		M+Acid	10.4298	821.67
Lipidomics	Glc/Gal-ceramide	Hex-Cer(26:0)	0.196321	1.1754e-06	6.49884e+06	1.27586e+06	6807162	6679191	7.00445e+06	6.24967e+06	5.75372e+06	1.25378e+06	1.26268e+06	1.17295e+06	1.66766e+06	1.02222e+06	4.52e+06	4200266	4.05656e+06	3.91696e+06	4772276	4343700	0.0678193		M+Acid	10.8104	839.72
Lipidomics	Glc/Gal-ceramide	Hex-Cer(26:1)	0.741534	1.02008e-05	7.28796e+07	5.40427e+07	73541952	75099632	72248416	68620736	74887248	54399076	54370852	52599040	55795324	53049052	71373288	68196304	66722280	65957512	63950372	63250080	0.0529959		M+Acid	10.6723	837.703
Lipidomics	Glc/Gal-ceramide	Hex-Cer(26:2)	0.860856	0.0559676	4.12266e+06	3.54902e+06	4549969	4.46962e+06	3.82316e+06	3.75669e+06	4013848	2808064	3.64046e+06	3.9369e+06	3.56794e+06	3.79172e+06	3293951	3.99984e+06	3.74553e+06	3.61259e+06	3636070	3.5521e+06	0.06268		M+Acid	10.5517	835.689
Lipidomics	Glc/Gal-ceramide-OH	Hex-Cer(18:0)-OH	1.15561	0.141751	8.21064e+06	9.48832e+06	8582037	8156057	8786234	8249676	7279199	10415814	9815694	7783748	11373406	8052921	10270822	10303674	8837693	8813989	8220026	9996141	0.100402		M+Acid	9.99462	743.588
Lipidomics	Glc/Gal-ceramide-OH	Hex-Cer(18:1)-OH	1.49557	0.00501059	3.15256e+06	4.71486e+06	3.26217e+06	3.44051e+06	2.79633e+06	3099829	3163952	3.77191e+06	5.33023e+06	5220781	5.04273e+06	4.20866e+06	4320903	3.34682e+06	4.14181e+06	4.01673e+06	3.92715e+06	5.00434e+06	0.125752		M+Acid	9.79798	741.574
Lipidomics	Glc/Gal-ceramide-OH	Hex-Cer(20:0)-OH	9.21412	0.00397505	793907	7.31515e+06	516013	1.32426e+06	0	936344	1.19291e+06	6771914	8553700	4.30473e+06	10999978	5945452	4.64411e+06	3.68148e+06	2.85695e+06	3256114	1.90613e+06	3.22188e+06	0.252064		M+Acid	10.2357	771.62
Lipidomics	Glc/Gal-ceramide-OH	Hex-Cer(20:1)-OH	10.7771	2.7564e-06	548536	5.91163e+06	1.54983e+06	0	0	1.19285e+06	0	4944704	5.73852e+06	6.78669e+06	6.18702e+06	5.9012e+06	3.27424e+06	3.14629e+06	2.96491e+06	3.55761e+06	2.97897e+06	3.14869e+06	0.0638103		M+Acid	10.041	769.604
Lipidomics	Glc/Gal-ceramide-OH	Hex-Cer(22:0)-OH	1.52783	0.040293	1.14147e+08	174397120	112478464	114631616	133531992	116182848	93910504	188085488	181643296	134216904	240713328	127326584	149514464	146045008	141293968	149739312	160037664	161535040	0.0568422		M+Acid	10.4313	799.653
Lipidomics	Glc/Gal-ceramide-OH	Hex-Cer(22:1)-OH	3.69984	2.55397e-06	1.46202e+07	54092392	15004562	14271010	14517706	14599489	14708142	52689744	52483932	57946828	54912332	52429124	37147304	34364692	34238088	35368544	33205094	33120948	0.0402435		M+Acid	10.2601	797.635
Lipidomics	Glc/Gal-ceramide-OH	Hex-Cer(24:0)-OH	0.784817	0.118601	3.55964e+08	2.79367e+08	334311680	336892160	440480768	363136064	304998272	264076400	267051312	260374000	412968608	192362416	315432096	309713728	311764768	330952352	347647040	365778400	0.0701439		M+Acid	10.6068	827.683
Lipidomics	Glc/Gal-ceramide-OH	Hex-Cer(24:1)-OH	2.01675	7.14806e-08	4.7658e+08	961143760	478282816	495769824	469748192	460373952	478726752	1004237250	957830340	938523140	935591170	969536900	828330750	769752510	742518140	742446270	726627780	727313150	0.0553199		M+Acid	10.4416	825.666
Lipidomics	Glc/Gal-ceramide-OH	Hex-Cer(24:2)-OH	2.8697	4.42902e-06	3.62025e+06	1.0389e+07	3450428	3.58799e+06	3.99887e+06	3.25868e+06	3.80529e+06	9685036	9837225	10739536	10216921	11466488	6.01437e+06	7919313	7363016	6753013	7.21799e+06	6323222	0.0932644		M+Acid	10.2929	823.65
Lipidomics	Glc/Gal-ceramide-OH	Hex-Cer(25:0)-OH	1.412	0.134542	21161258	29879682	20542668	21116956	23633450	22905106	17608110	29949882	28019002	24540454	47126260	19762812	24962120	25355382	24494740	25240120	27239984	29667504	0.0735413		M+Acid	10.7016	841.698
Lipidomics	Glc/Gal-ceramide-OH	Hex-Cer(25:1)-OH	3.20032	2.14081e-06	4.00592e+07	1.28202e+08	39825612	43411364	38855284	37948312	40255664	130906528	132381576	116004616	130189408	131529968	89542608	87231344	89821304	85052792	83028720	88508056	0.0287782		M+Acid	10.5459	839.682
Lipidomics	Glc/Gal-ceramide-OH	Hex-Cer(25:2)-OH	2.64024	8.78458e-07	3.65434e+06	9648342	4231471	3.73784e+06	3616431	3.11514e+06	3.57083e+06	9037216	10516385	9279462	9231644	10177003	6.98794e+06	5962757	7.27015e+06	7024718	7440812	7163393	0.0875915		M+Acid	10.388	837.665
Lipidomics	Glc/Gal-ceramide-OH	Hex-Cer(26:0)-OH	0.474996	0.0098275	5.50017e+06	2.61256e+06	5.21859e+06	6.05148e+06	5911694	5.70719e+06	4611915	2.17982e+06	1960774	2.08615e+06	5.28511e+06	1.55094e+06	4206468	4320623	3.94267e+06	4551615	4513797	5102872	0.091951		M+Acid	10.7754	855.714
Lipidomics	Glc/Gal-ceramide-OH	Hex-Cer(26:1)-OH	0.843917	0.0010469	42440660	3.58164e+07	39790616	43477600	43558032	41633980	43743072	34696136	37460160	34877072	38840568	33208006	45201088	41146764	39692656	39977720	41665412	41570248	0.0548511		M+Acid	10.6212	853.698
GC/MS	Gly/Ser/Thr pathway	Glycine	0.548819	0.000855799	643197	352999	728253	692537	539259	573416	682522	386651	437683	374346	374208	192108	223878	273829	263567	339492	334159	473337	0.231829
GC/MS	Gly/Ser/Thr pathway	Threonine	0.73525	0.00136473	398827	293237	408079	368971	365244	459592	392249	247399	297446	296461	310019	314862	256408	314868	320506	303088	303059	425639	0.164995
GC/MS	Gly/Ser/Thr pathway	Serine	0.667667	0.000710309	7.30138e+06	4874893	7686040	7077710	6253516	7877267	7612366	4575047	4855014	4922154	5083858	4938392	4515917	5451731	5478965	5691945	5732058	7391978	0.156681
GC/MS	Glycolysis	Glucose	0.748508	0.195147	242897	181811	185306	193489	218396	379368	237928	155608	174353	110293	233856	234943	349436	410926	407874	523547	514527	510145	0.211146
GC/MS	Glycolysis	Pyruvic acid	1.24877	0.0203938	49563.8	61893.6	54920	36516	50913	50078	55392	59145	61162	55428	64937	68796	40869	46132	40142	54266	50062	53760	0.166331
GC/MS	Glycolysis	Glucose-6-phosphate	0.858932	0.319497	16684.2	14330.6	13749	14223	16898	15197	23354	15625	15424	9119	14735	16750	19418	23878	23983	26639	28497	27553	0.136417
GC/MS	Glycolysis	Lactic acid	0.910415	0.0571652	2.21117e+06	2.01308e+06	2171797	2145995	2201043	2189045	2347949	2029160	1786325	1971127	2258220	2020556	1540988	1829959	1817079	2094947	2025884	2098549	0.134807
Lipidomics	GM1 Ganglioside	GM1(16:0)	1.4038	0.0143012	4.1488e+07	58240676	38998384	44698788	41897900	38674836	43170156	65913824	61497548	41874048	62314544	59603416	62048956	55255620	49173440	48334048	47896704	46665196	0.10847		M-H	8.94226	1517.84
Lipidomics	GM1 Ganglioside	GM1(18:0)	1.38133	0.00931277	5.792e+08	800063936	597378050	619798850	605101380	570083460	503637952	916971580	790610240	612545340	853214340	826978180	714547200	649128900	648408320	602249020	570088580	600210820	0.0758391		M-H	9.09421	1545.87
Lipidomics	GM1 Ganglioside	GM1(18:1)	1.15296	0.0475821	197309392	2.2749e+08	180795568	218831600	195940624	176637616	214341552	257829088	242852592	210230544	212370192	214166080	238746880	217235536	218728736	221517760	198097504	223349040	0.0631132		M-H	8.99558	1543.86
Lipidomics	GM1 Ganglioside	GM1(18:2)	1.31064	0.0855758	1.19427e+06	1.56527e+06	1.31315e+06	1.42285e+06	620375	1.40282e+06	1.21218e+06	1.22287e+06	1457313	1.60657e+06	1.61171e+06	1927884	1.33473e+06	1.317e+06	1.57634e+06	1.48734e+06	1169634	1.8472e+06	0.163681		M-H	8.88575	1541.84
Lipidomics	GQ1 Ganglioside	GQ1(18:0)	0.676676	0.037294	8.83553e+07	5.97879e+07	72829008	98483608	105015088	82281232	83167792	78041024	63359692	25649618	74946616	56942648	92742856	79343048	70145776	63725804	61859536	63391420	0.172969		(M-2H)/2	8.10144	2419.15
Lipidomics	GQ1 Ganglioside	GQ1(18:1)	0.584817	0.000188742	1.21089e+07	7.08152e+06	11258794	12768853	12275645	11900588	12340854	7530134	7431817	5005886	7354339	8085440	9339137	9187842	9391047	9647687	8600642	9327552	0.0633847		(M-2H)/2	7.97311	2417.14
Lipidomics	GQ1 Ganglioside	GQ1(20:0)	0.839861	0.49628	3.34055e+06	2.8056e+06	2339748	3.85868e+06	4.43635e+06	3.08314e+06	2984837	3714807	2.93769e+06	626960	4395776	2.35276e+06	4.04749e+06	3.17104e+06	3191766	3.09247e+06	2.5714e+06	2785391	0.156649		(M-2H)/2	8.2835	2447.19
Lipidomics	GQ1-NeuGc Ganglioside	GQ1-NeuGc(18:0)	0.901037	0.46125	4.99404e+07	44998146	46530928	55492148	53789424	45612184	48277240	55817444	44660760	23284810	54791532	46436184	52524788	47274608	45384908	39361740	39257720	37361212	0.136959		(M-2H)/2	8.09416	2483.15
Lipidomics	GQ1-NeuGc Ganglioside	GQ1-NeuGc(18:1)	0.787511	0.00994351	5.82163e+06	4.5846e+06	5309040	5901794	5577282	5878296	6.44174e+06	5.23407e+06	4397349	3.53426e+06	4872426	4884888	5770713	4.85776e+06	5060398	4947661	4.46656e+06	4.80179e+06	0.0865258		(M-2H)/2	7.95954	2481.13
Lipidomics	GQ1-NeuGc Ganglioside	GQ1-NeuGc(20:0)	1.27771	0.202445	9.16276e+06	1.17074e+07	7809020	9661365	11268372	8507317	8567708	13652418	12330533	6.35143e+06	15969615	10232900	10900956	11321904	9793202	9770817	9150757	8968842	0.093001		(M-2H)/2	8.41896	2511.18
Lipidomics	GT1 Ganglioside	GT1(16:0)	0.699989	0.00172829	4.72979e+07	3.3108e+07	42812192	50495584	50784912	45970064	46426676	38624888	33940112	24422044	35935492	32617362	44786728	41210668	38721308	36213008	35430404	34444944	0.103065		(M-2H)/2	7.93763	2100.03
Lipidomics	GT1 Ganglioside	GT1(16:1)	0.187913	0.000392363	645121	121227	574450	686863	413914	776707	773670	192772	34401.8	0	144774	234185	547820	366936	540748	507027	485885	588123	0.142055		(M-2H)/2	7.77378	2098.01
Lipidomics	GT1 Ganglioside	GT1(17:0)	0.666999	0.0176272	9.56353e+06	6.37887e+06	9009636	10462991	9909879	9001808	9433319	8183060	6.96189e+06	3.46334e+06	7753287	5532762	9326148	7.84565e+06	7625568	6.63341e+06	6874607	6.75189e+06	0.136453		(M-2H)/2	8.05643	2114.05
Lipidomics	GT1 Ganglioside	GT1(18:0)	0.754377	0.0328733	3260179456	2459403084	2925729280	3548261380	3578899200	3064360960	3183646460	2953794300	2577281280	1479239040	2791969540	2494731260	3134681340	2918924540	2802537980	2683987710	2556371970	2541710080	0.0892374		(M-2H)/2	8.16528	2128.06
Lipidomics	GT1 Ganglioside	GT1(18:1)	0.614751	7.26494e-05	476687968	2.93044e+08	452512480	488656064	499331840	445547136	497392320	327310656	294044128	223815344	314839488	305212000	408331808	385197248	380123808	370027392	367220160	354057856	0.0566521		(M-2H)/2	8.02331	2126.05
Lipidomics	GT1 Ganglioside	GT1(19:0)	0.927801	0.617563	1.43048e+07	1.3272e+07	12629371	16275839	15829235	13609433	13180314	16310758	13816138	6826290	16937940	12469056	15649202	13877113	13610651	12453129	11934029	12639285	0.10887		(M-2H)/2	8.3118	2142.08
Lipidomics	GT1 Ganglioside	GT1(20:0)	0.923396	0.590547	400849600	3.70143e+08	362865024	432547104	475989088	376612928	356233856	460207808	388633024	203561696	468227360	330085024	414723136	385054880	360448096	372925248	355890464	355198496	0.0652128		(M-2H)/2	8.41754	2156.09
Lipidomics	GT1 Ganglioside	GT1(20:1)	0.717928	0.00387244	63075700	4.52838e+07	58513480	66200024	62966944	59905868	67792184	51429924	45431472	32030214	49881152	47646396	51587308	51879616	51657252	48968792	49277892	50034048	0.0272886		(M-2H)/2	8.27699	2154.07
Lipidomics	GT1 Ganglioside	GT1(21:0)	3.14155	0.000987131	1.57974e+06	4.96284e+06	1.81121e+06	1.15846e+06	1084351	2.37084e+06	1.47385e+06	3.95675e+06	5.36168e+06	4274630	6708235	4.51291e+06	2.2502e+06	2239829	3168008	3067200	3.69244e+06	3652870	0.201378		(M-2H)/2	8.52817	2170.11
Lipidomics	GT1 Ganglioside	GT1(22:0)	1.69147	0.0293422	7.05939e+06	1.19408e+07	7.14123e+06	7.49228e+06	7.34628e+06	7.24733e+06	6069840	12398463	13064540	7.86259e+06	16583170	9795073	10037476	8973993	8.09108e+06	9595904	9226924	8507543	0.072099		(M-2H)/2	8.67406	2184.12
Lipidomics	GT1 Ganglioside	GT1(22:1)	1.23379	0.0246831	5.47701e+06	6.75746e+06	6.54903e+06	4.97275e+06	4609790	5.8062e+06	5447316	7.10778e+06	6639330	5.61499e+06	6913625	7.51158e+06	5893452	5329456	5.57266e+06	5.10557e+06	5731191	5773172	0.0494806		(M-2H)/2	8.48833	2182.11
Lipidomics	GT1 Ganglioside	GT1(24:1)	1.42697	0.00975937	1.1622e+07	1.65843e+07	10710570	12362903	12000832	11763122	11272597	19102140	17101374	12422346	17689960	16605457	15506476	14559990	13053608	11999849	13418585	13804238	0.0867114		(M-2H)/2	8.69756	2210.14
Lipidomics	Hydroxy free fatty acid	FFA(C18:0-OH)	0.873906	0.215169	413101	361011	494476	454680	410257	293473	412617	347415	322849	412233	384618	337941	351376	357392	466895	408981	445774	498809	0.174449		M-H	7.73069	300.266
Lipidomics	Hydroxy free fatty acid	FFA(C18:1-OH)	1.32375	0.231989	128134	169617	206627	140424	110213	97048.1	86355.9	102196	239723	186407	134668	185090	129071	164298	166784	186627	200768	179136	0.224689		M-H	7.53131	298.25
GC/MS	Lipid pathway	Glycerol-3-phosphate	1.00255	0.934583	1.58736e+06	1.59141e+06	1545399	1617475	1466872	1698008	1609049	1568494	1613309	1651167	1630055	1494029	1401973	1594546	1646007	2018191	2059547	1987907	0.156128
GC/MS	Lipid pathway	3-hydroxybutyric acid	0.588911	0.000220525	78742.6	46372.4	82620	90594	68866	73112	78521	38429	46049	45681	58684	43019	40164	47228	47426	54511	45766	52451	0.12939
GC/MS	Lys pathway	Lysine	0.584185	0.000207356	590684	345069	575869	549621	533197	681944	612789	314475	336579	339636	390303	344352	332413	394247	411483	516225	536854	530166	0.214567
Lipidomics	Lysophosphatidic acid(acyl)	LPA(a-14:0)	25.5583	0.207013	102.629	2623.01	0	513.143	0	0	0	0	0	5055.93	8059.11	0	7259.42	4045.41	2844.84	4504.6	5211.46	6207.35	0.294131		M-H	6.61934	382.211
Lipidomics	Lysophosphatidic acid(acyl)	LPA(a-16:0)	1.65361	0.0198697	1.56622e+06	2.5899e+06	1.82283e+06	1.58459e+06	1.70567e+06	1.34264e+06	1.37535e+06	2.22886e+06	2.23223e+06	3712518	2284298	2491612	2.061e+06	2.11924e+06	2270910	2.24673e+06	2413851	2465585	0.0753004		M-H	7.24795	410.243
Lipidomics	Lysophosphatidic acid(acyl)	LPA(a-16:1)	2.415	0.0293526	36076.2	87124	32992.7	48612.9	27964.6	39155.2	31655.8	56603.3	70365.3	147123	84288.9	77239.3	55206.9	53504.5	69344	71547.8	51493.3	61976.3	0.219494		M-H	6.88389	408.226
Lipidomics	Lysophosphatidic acid(acyl)	LPA(a-18:1)	1.95819	5.86212e-05	2.95727e+06	5.79091e+06	3.60168e+06	3094562	3.11927e+06	2.6008e+06	2.37004e+06	5485374	5.55857e+06	6893180	5393896	5623532	4.08708e+06	4329653	4549449	4876278	5.11928e+06	5.40664e+06	0.104852		M-H	7.38059	436.258
Lipidomics	Lysophosphatidic acid(acyl)	LPA(a-20:4)	1.52816	0.002455	686223	1.04866e+06	869336	614609	721893	610848	614427	900473	969923	1.21736e+06	968710	1.18684e+06	847837	858802	902507	932436	1.07936e+06	1.02138e+06	0.0958187		M-H	7.00866	458.242
Lipidomics	Lysophosphatidylcholine(acyl)	LPC(a-14:0)	1.03556	0.863866	8.42441e+06	8723980	10308890	7242210	9203486	8.04793e+06	7319543	6.63938e+06	7080564	14891293	7142118	7.86655e+06	6869718	7.09431e+06	7.37677e+06	7307326	7251824	7847017	0.0485514		M+H	6.99579	467.301
Lipidomics	Lysophosphatidylcholine(acyl)	LPC(a-14:0)	1.10485	0.690458	3.26714e+07	36096906	42296140	26937274	36539144	30574686	27009858	26851334	28211908	66279188	28499212	30642888	27270836	27767182	27712290	29321718	29907288	30275540	0.0449856		M+H	7.12675	467.301
Lipidomics	Lysophosphatidylcholine(acyl)	LPC(a-16:0)	1.07954	0.628523	692552794	747640578	852763460	610357120	719310340	654025660	626307390	636676290	624489860	1138264830	654708100	684063810	612865540	634629500	620804800	663661890	661203260	665698110	0.033419		M+H	7.58608	495.331
Lipidomics	Lysophosphatidylcholine(acyl)	LPC(a-16:0)	1.08115	0.52122	2095284018	2265315534	2483284480	1834898940	2240294140	2033768450	1884174080	2018436740	2009987460	3140271100	2044784640	2113097730	1844013180	1883262340	1964801660	1985484420	1979309820	1945276540	0.0330219		M+H	7.70767	495.331
Lipidomics	Lysophosphatidylcholine(acyl)	LPC(a-16:1)	1.40321	0.19064	1.38439e+08	194259104	173735264	112140536	152996432	134699104	118624712	149194000	155751984	332757344	157853408	175738784	132158128	136231344	138983104	142834688	144969136	147914688	0.040669		M+H	7.31761	493.316
Lipidomics	Lysophosphatidylcholine(acyl)	LPC(a-16:1)	1.56372	0.0996165	2.56889e+07	4.01703e+07	30188648	21976828	27687878	25691228	22899980	32314668	33534864	67277528	32735560	34989024	26198398	27130038	27730104	27631668	27444158	27523114	0.0238236		M+H	7.1834	493.316
Lipidomics	Lysophosphatidylcholine(acyl)	LPC(a-17:0)	1.00316	0.986477	2.9848e+07	2.99424e+07	38001008	24655862	32429402	28244688	25908988	25511294	24473494	48967140	25532360	25227958	24390256	24838786	25580736	25479166	26570262	26534528	0.0363262		M+H	7.96736	509.347
Lipidomics	Lysophosphatidylcholine(acyl)	LPC(a-17:0)	1.00794	0.960277	4.15746e+06	4.19047e+06	5422259	3.43612e+06	4471683	3.80629e+06	3.65095e+06	3811954	3.6112e+06	6.29723e+06	3.68191e+06	3.55005e+06	3.59965e+06	3.5977e+06	3.6609e+06	3590067	3.49749e+06	3.71946e+06	0.0345981		M+H	7.88317	509.348
Lipidomics	Lysophosphatidylcholine(acyl)	LPC(a-17:1)	0.902297	0.886896	71648.4	64648.1	109525	21264.5	130358	69278.5	27816.6	0	24576.6	230456	31829.2	36378.3	71435.2	68446	26220.3	73081.4	69936.4	89151.4	0.288311		M+H	7.47288	507.333
Lipidomics	Lysophosphatidylcholine(acyl)	LPC(a-17:1)	1.6586	0.199632	3.55108e+06	5.88981e+06	4968446	2.1746e+06	4.48307e+06	3067948	3.06133e+06	3811821	3700159	11743597	5190355	5.00314e+06	3926333	4.32871e+06	2.55307e+06	3.90787e+06	4.19867e+06	3.36163e+06	0.179943		M+H	7.58846	507.332
Lipidomics	Lysophosphatidylcholine(acyl)	LPC(a-18:0)	1.13627	0.364847	3.59575e+08	4.08574e+08	439808928	311981152	399325536	345437952	301320000	364471456	374267552	577982720	341599680	384549344	322674304	316108320	317699104	329639808	339193504	326736384	0.0240047		M+H	8.10135	523.362
Lipidomics	Lysophosphatidylcholine(acyl)	LPC(a-18:0)	1.17106	0.273132	916282366	1073024768	1085621760	831986940	989117310	861958140	812727680	909902530	925689280	1536640260	963740350	1029151420	854860670	863128320	910267330	887287300	894177860	891444480	0.0229364		M+H	8.21105	523.362
Lipidomics	Lysophosphatidylcholine(acyl)	LPC(a-18:1)	1.18877	0.145752	4.35925e+08	5.18214e+08	497523776	385964960	457493472	433217344	405424320	475566944	482139392	695170750	480515744	457678272	429389344	439170752	441975136	437641632	427984128	412839328	0.0373243		M+H	7.7274	521.347
Lipidomics	Lysophosphatidylcholine(acyl)	LPC(a-18:1)	1.17118	0.282519	1958982706	2294326912	2437874940	1704815100	2064355970	1849849340	1738018180	1983509890	2049026300	3294631680	2070640130	2073826560	1814688640	1788669700	1886535170	1935465220	1962819840	1904657660	0.0363908		M+H	7.83798	521.347
Lipidomics	Lysophosphatidylcholine(acyl)	LPC(a-18:2)	1.06108	0.765574	98386024	1.04395e+08	133265032	84714568	98952896	90151304	84846320	87952432	82059992	171703088	95992192	84267600	84323616	84302960	84104184	89206928	90392624	91789712	0.0367675		M+H	7.52214	519.331
Lipidomics	Lysophosphatidylcholine(acyl)	LPC(a-18:2)	1.06048	0.750216	3.11407e+07	3.3024e+07	39538576	27184872	31343572	29839390	27796928	28430274	26501044	53496008	30183790	26508792	27442150	26912358	27296678	29055010	29258716	28566436	0.0332605		M+H	7.4076	519.331
Lipidomics	Lysophosphatidylcholine(acyl)	LPC(a-18:3)	2.49317	0.484489	101991	254280	203839	57376.5	84050.4	115565	49122.1	61292.3	58207.4	1.04093e+06	50878	60093.4	66902.9	54750.7	97126.7	58078.2	63208.1	61727	0.214476		M+H	7.23972	517.315
Lipidomics	Lysophosphatidylcholine(acyl)	LPC(a-19:0)	1.86248	0.0255512	864755	1.61059e+06	1.06131e+06	741236	950648	805501	765075	1.56677e+06	1.24705e+06	2467681	1319712	1451709	1.0466e+06	1.05645e+06	1.01242e+06	1.07579e+06	1.07098e+06	1151892	0.0396583		M+H	8.33086	537.378
Lipidomics	Lysophosphatidylcholine(acyl)	LPC(a-19:0)	1.86965	0.0218709	4.72928e+06	8.84209e+06	5918008	3911411	5.06308e+06	4864681	3889219	7.42448e+06	7279574	13489907	7722981	8.2935e+06	5.80008e+06	5.57192e+06	5947297	6231887	6050367	6.01221e+06	0.036541		M+H	8.42993	537.378
Lipidomics	Lysophosphatidylcholine(acyl)	LPC(a-19:1)	1.45689	0.159207	7.93729e+06	1.15637e+07	10911309	6373680	9109759	6959648	6.33205e+06	9161388	9639220	19705560	9482436	9830079	7305855	7.71672e+06	7798780	8.21307e+06	8200826	7916211	0.0407343		M+H	8.07001	535.363
Lipidomics	Lysophosphatidylcholine(acyl)	LPC(a-19:1)	1.32338	0.292044	1.76196e+06	2.33175e+06	2.28767e+06	1.25016e+06	2169849	1.5809e+06	1.52125e+06	1.89845e+06	1957128	4.11705e+06	1.8162e+06	1.86992e+06	1.67025e+06	1.72495e+06	1.71913e+06	1.77579e+06	1.79664e+06	1.7172e+06	0.0397114		M+H	7.97102	535.365
Lipidomics	Lysophosphatidylcholine(acyl)	LPC(a-20:0)	0.755085	0.0602919	11398953	8.60718e+06	14736359	10021236	12809521	10895733	8531916	8382808	8207977	10350353	7519222	8575544	7982188	7965156	8398391	8807710	9059647	9337382	0.060523		M+H	8.54075	551.394
Lipidomics	Lysophosphatidylcholine(acyl)	LPC(a-20:0)	1.13649	0.356109	2.22307e+07	2.52651e+07	26457520	19719424	24368624	21730400	18877694	21972352	21462244	35743444	22233334	24914198	20706296	20687026	21251034	21191210	21477290	22273272	0.0252104		M+H	8.64273	551.394
Lipidomics	Lysophosphatidylcholine(acyl)	LPC(a-20:1)	1.13959	0.414775	1.59535e+07	1.81804e+07	19627256	14179544	17758700	14773034	13429055	15240154	16791958	27092020	15113674	16664210	14165271	14360217	15203995	15294794	15739756	15040365	0.0363579		M+H	8.17611	549.378
Lipidomics	Lysophosphatidylcholine(acyl)	LPC(a-20:1)	1.2297	0.342344	145514696	1.78939e+08	186396800	121372976	159359840	135928688	124515176	145948768	147896016	297390880	148105200	155354368	129991608	133634104	134948912	140688336	143033568	140322608	0.0351519		M+H	8.29076	549.378
Lipidomics	Lysophosphatidylcholine(acyl)	LPC(a-20:2)	0.99754	0.991366	3.72435e+07	3.71519e+07	47916364	31178346	41834752	33549078	31738894	28801776	27713436	66547692	29887568	32808810	29234632	29624562	30520818	31177348	33528954	32760244	0.0507589		M+H	7.99767	547.362
Lipidomics	Lysophosphatidylcholine(acyl)	LPC(a-20:2)	0.888068	0.547541	4.74923e+06	4.21764e+06	6251162	3844979	4898124	4.41591e+06	4335997	3.75107e+06	3.53748e+06	7116287	3.28309e+06	3.40027e+06	4.04439e+06	3.85365e+06	4.08822e+06	4043778	3.81974e+06	3833809	0.0429697		M+H	7.8973	547.362
Lipidomics	Lysophosphatidylcholine(acyl)	LPC(a-20:3)	0.9727	0.923485	3.17747e+07	3.09073e+07	43967784	23335880	36652536	29242694	25674770	20214866	18855502	60092176	21496224	33877636	21198226	20823952	21312204	20756188	32954480	31312836	0.213877		M+H	7.74046	545.347
Lipidomics	Lysophosphatidylcholine(acyl)	LPC(a-20:3)	0.929235	0.808626	7.81068e+06	7.25796e+06	10549376	7132466	5555775	8137488	7.67832e+06	3.30065e+06	5.11918e+06	14775180	5265169	7829603	6297537	6.51399e+06	6.11296e+06	6.02688e+06	5672925	7509834	0.0908119		M+H	7.63656	545.347
Lipidomics	Lysophosphatidylcholine(acyl)	LPC(a-20:4)	1.13186	0.538444	6.42054e+08	726713046	865490820	513396288	687578370	603453630	540349120	586233020	584308990	1174985980	601018620	687018620	543852160	557938110	556903490	590628800	626975940	615292930	0.0541852		M+H	7.53367	543.331
Lipidomics	Lysophosphatidylcholine(acyl)	LPC(a-20:4)	1.1186	0.418959	2.02067e+08	226033264	238661808	177741024	224460656	191065952	178406512	195370336	194829904	323194880	199904784	216866416	186354832	185130512	186308064	200155696	196410064	196702864	0.0336947		M+H	7.42638	543.331
Lipidomics	Lysophosphatidylcholine(acyl)	LPC(a-20:5)	1.30214	0.410226	6.38373e+06	8.31254e+06	8395188	5140102	7.0792e+06	6332198	4971948	4642187	6.02913e+06	16229265	7159285	7502817	5.75163e+06	6017507	5643205	6057723	6155589	6541884	0.048232		M+H	7.23759	541.315
Lipidomics	Lysophosphatidylcholine(acyl)	LPC(a-20:5)	1.22998	0.516739	1.0088e+06	1.2408e+06	1131352	898490	1.17909e+06	982544	852504	556293	944829	2.46359e+06	1.13867e+06	1100648	970539	959393	924575	1.00181e+06	992054	967395	0.0293995		M+H	7.12409	541.315
Lipidomics	Lysophosphatidylcholine(acyl)	LPC(a-21:0)	2.55852	0.0443293	3.72625e+06	9.53368e+06	5856568	2.49321e+06	3941619	3.39459e+06	2.94525e+06	8.20563e+06	7408164	17650046	6796586	7607993	4.87284e+06	4835509	4903360	4678994	4.97872e+06	4767871	0.0271222		M+H	8.81084	565.409
Lipidomics	Lysophosphatidylcholine(acyl)	LPC(a-21:1)	1.15277	0.56446	1.14147e+06	1.31585e+06	1.66708e+06	820076	1302244	1.05569e+06	862249	1.01681e+06	1123038	2.26043e+06	935035	1243923	815593	976926	911964	985499	969519	998517	0.0759436		M+H	8.48636	563.392
Lipidomics	Lysophosphatidylcholine(acyl)	LPC(a-22:0)	1.07441	0.863804	684229	735139	1.06232e+06	521660	805624	630132	401403	759632	266563	1.69774e+06	306297	645467	444514	546958	399547	504296	665873	532092	0.168781		M+H	8.79929	579.424
Lipidomics	Lysophosphatidylcholine(acyl)	LPC(a-22:0)	0.971081	0.904963	4.62477e+07	44910252	59623496	35189544	54889112	46189584	35346676	35673288	35286412	82978304	34405104	36208152	36277600	39349384	40740484	41417212	44410328	42067524	0.0614735		M+H	9.02699	579.426
Lipidomics	Lysophosphatidylcholine(acyl)	LPC(a-22:1)	1.08	0.703072	4.45064e+06	4.80668e+06	5711103	3614879	4.95027e+06	4389894	3587064	4.0762e+06	3.80216e+06	7967576	4.03939e+06	4148095	3.69081e+06	4087460	3.72051e+06	3.85275e+06	3.88813e+06	4.11025e+06	0.062742		M+H	8.59288	577.41
Lipidomics	Lysophosphatidylcholine(acyl)	LPC(a-22:1)	1.16258	0.563225	1.69155e+07	1.96656e+07	24048016	13584965	17792116	15541901	13610740	15055118	15631391	35753612	14765730	17122258	14453468	14576162	14660039	14917067	15474253	15633220	0.0302669		M+H	8.71138	577.41
Lipidomics	Lysophosphatidylcholine(acyl)	LPC(a-22:2)	0.728733	0.149888	188114	137085	247865	166183	218737	167331	140453	114327	74995.7	227147	127849	141105	99237.4	121591	131876	105908	117342	131668	0.122379		M+H	8.3483	575.393
Lipidomics	Lysophosphatidylcholine(acyl)	LPC(a-22:2)	0.746507	0.243909	1.53164e+06	1.14338e+06	2.08106e+06	1.01123e+06	1724868	1.6276e+06	1213448	871302	846866	2.09761e+06	847594	1.05352e+06	1.0107e+06	1.02293e+06	1.08351e+06	1.18454e+06	1.09411e+06	1218830	0.0710925		M+H	8.44372	575.393
Lipidomics	Lysophosphatidylcholine(acyl)	LPC(a-22:3)	0.798669	0.203054	209668	167456	265888	191609	236844	182633	171367	122857	181494	253336	120562	159029	144469	161553	163909	127684	165844	201538	0.150701		M+H	8.08442	573.379
Lipidomics	Lysophosphatidylcholine(acyl)	LPC(a-22:3)	0.987104	0.936853	1.48161e+06	1.4625e+06	1.86685e+06	1.21542e+06	1.58041e+06	1.52147e+06	1.22388e+06	1.15864e+06	1.36896e+06	2229863	1.16952e+06	1.38552e+06	1185456	1.24429e+06	1.44383e+06	1.37634e+06	1.25589e+06	1.25971e+06	0.0696785		M+H	8.16068	573.377
Lipidomics	Lysophosphatidylcholine(acyl)	LPC(a-22:4)	1.05427	0.585121	10136775	1.06869e+07	11609183	9169584	10628571	9906610	9369927	9640882	9362924	13844267	9547663	11038630	9679308	9362316	9635702	10085846	8783410	8924264	0.054825		M+H	7.85652	571.362
Lipidomics	Lysophosphatidylcholine(acyl)	LPC(a-22:4)	1.28597	0.369623	7.62844e+07	98099184	102444968	59054488	83606992	73631776	62683800	73070056	74564528	180289280	73702168	88869888	66090040	67560200	69799552	71507992	71023224	73265736	0.0394155		M+H	7.94972	571.362
Lipidomics	Lysophosphatidylcholine(acyl)	LPC(a-22:5)	1.11719	0.565907	4.08383e+06	4.56244e+06	5.32015e+06	3.49262e+06	4.10424e+06	4.04938e+06	3452775	2.93632e+06	3805328	6922738	3772096	5.3757e+06	4.08994e+06	4.06212e+06	3950529	3.79711e+06	3290959	4.00198e+06	0.0793426		M+H	7.79984	569.347
Lipidomics	Lysophosphatidylcholine(acyl)	LPC(a-22:5)	1.24829	0.316224	9.73444e+06	1.21515e+07	12138565	8556065	9803542	9776147	8397892	8993437	10083296	20276594	10430730	10973212	8777832	9187543	9125149	9390436	9999031	10201826	0.0543883		M+H	7.68432	569.347
Lipidomics	Lysophosphatidylcholine(acyl)	LPC(a-22:6)	1.20111	0.395438	4.93548e+08	592806842	695177340	395409600	511182816	448092000	417876480	462016192	472864768	963734080	496272160	569147010	433189696	436799168	440761632	462673600	497579296	486915392	0.0545244		M+H	7.53129	567.331
Lipidomics	Lysophosphatidylcholine(acyl)	LPC(a-22:6)	1.22081	0.262998	1.41658e+08	1.72937e+08	175763040	122655104	154151568	132096888	123624432	141146736	144571760	263341536	152046048	163580848	135213952	133952240	132781768	140832160	140923264	141207328	0.0288216		M+H	7.42769	567.331
Lipidomics	Lysophosphatidylcholine(acyl)	LPC(a-23:0)	1.93278	0.0857363	1.83578e+06	3.54817e+06	2575490	1.28258e+06	2.05649e+06	1983227	1.28113e+06	2.904e+06	2.66905e+06	6.52766e+06	2.42687e+06	3213264	2.27139e+06	1.97398e+06	2.10541e+06	2.1836e+06	2.48144e+06	2.52607e+06	0.0876343		M+H	9.11599	593.442
Lipidomics	Lysophosphatidylcholine(acyl)	LPC(a-23:0)	1.67729	0.00770938	10332408	1.73305e+07	13036776	9158116	10727004	9915326	8824818	16816534	14762342	23181016	14424370	17468140	11327432	12125290	11692014	12818108	12375812	11941119	0.0404387		M+H	9.21449	593.441
Lipidomics	Lysophosphatidylcholine(acyl)	LPC(a-23:1)	4.48464	0.0416212	1.30056e+06	5.83253e+06	2.06009e+06	978298	1.27569e+06	1.27233e+06	916372	4.19415e+06	4.37279e+06	11988689	4108871	4.49813e+06	2.27609e+06	2.3109e+06	2379660	2.69983e+06	2547613	2444553	0.0637346		M+H	8.89627	591.425
Lipidomics	Lysophosphatidylcholine(acyl)	LPC(a-23:1)	4.44365	0.023726	1.3609e+06	6.04734e+06	1.94394e+06	1.02382e+06	1.40944e+06	1.41028e+06	1.017e+06	5.22187e+06	4667454	11308458	4051651	4.98728e+06	2.42495e+06	2.45837e+06	2.28935e+06	2.48182e+06	2.57121e+06	2.45636e+06	0.0362733		M+H	8.80191	591.426
Lipidomics	Lysophosphatidylcholine(acyl)	LPC(a-24:0)	0.562356	0.000230054	2.43725e+08	1.3706e+08	287627008	222429632	255043520	235418192	218106352	138333696	115982496	167835296	111500680	151649136	180861136	183355504	180384080	179584912	181087504	184329760	0.00934123		M+H	9.37958	607.457
Lipidomics	Lysophosphatidylcholine(acyl)	LPC(a-24:1)	1.52935	0.186759	3.30293e+07	50513248	40599808	27235816	36963240	32911924	27435500	38289136	38241140	93996896	39039000	43000068	32531080	34284408	35336096	35209508	36766704	35164440	0.0372747		M+H	9.06279	605.441
Lipidomics	Lysophosphatidylcholine(acyl)	LPC(a-24:2)	0.91534	0.789764	1.32943e+06	1.21688e+06	2.00979e+06	1.03122e+06	1.40045e+06	1.22245e+06	983248	941136	964242	2.63765e+06	856343	685047	901608	1.08354e+06	1.02921e+06	1.02291e+06	1.00495e+06	1.08424e+06	0.0682004		M+H	8.80796	603.425
Lipidomics	Lysophosphatidylcholine(acyl)	LPC(a-24:4)	0.937399	0.778912	7873949	7.38103e+06	10376599	6080488	8698562	8023005	6191091	5.7432e+06	5.79663e+06	13193859	5324474	6847003	5.87824e+06	6.18488e+06	5837586	6288892	5.99172e+06	6112345	0.0272317		M+H	8.34378	599.394
Lipidomics	Lysophosphatidylcholine(acyl)	LPC(a-24:5)	0.974742	0.885103	3.23489e+06	3.15319e+06	4.13686e+06	2.55969e+06	3.68972e+06	3.10266e+06	2.68554e+06	2.45478e+06	2765905	4.884e+06	2.44129e+06	3.21996e+06	2739740	2.58687e+06	2.5466e+06	2.57677e+06	2.66838e+06	2501876	0.0325416		M+H	8.12521	597.379
Lipidomics	Lysophosphatidylcholine(acyl)	LPC(a-24:6)	1.16171	0.552426	5.64866e+06	6.56208e+06	7753815	4.30538e+06	5.9984e+06	5669949	4515760	4.78444e+06	4.95069e+06	11673050	5032544	6369687	4819706	4710218	5.1097e+06	5040832	5058416	5288788	0.0406478		M+H	7.90987	595.361
Lipidomics	Lysophosphatidylcholine(acyl)	LPC(a-25:0)	1.19215	0.043712	2.40188e+07	2.86341e+07	26571188	21567774	25866810	23090386	22998014	27444772	26368198	31290646	24754792	33311900	25924008	24279552	25229110	26597176	25053604	25667758	0.0313462		M+H	9.52618	621.472
Lipidomics	Lysophosphatidylcholine(acyl)	LPC(a-26:0)	0.392272	0.000107902	2.07434e+06	813707	2.16968e+06	2.02827e+06	1936892	2.15347e+06	2.08341e+06	1.13773e+06	1.02448e+06	616857	672822	616650	1.68604e+06	1254835	1.09667e+06	822982	1.36934e+06	1.05462e+06	0.238351		M+H	9.59022	635.489
Lipidomics	Lysophosphatidylcholine(acyl)	LPC(a-26:1)	0.874486	0.20019	1.83155e+07	1.60166e+07	20840294	17189618	18834030	17664814	17048752	14434815	14389474	20775526	12816612	17666804	16229329	16502764	16171497	16178203	17029910	15004374	0.0385321		M+H	9.37589	633.472
Lipidomics	Lysophosphatidylcholine(acyl)	LPC(a-26:1)	0.784425	0.0205663	1.98128e+07	1.55417e+07	22911130	17813408	20967882	18733832	18637906	13949560	14280372	18280908	12937599	18259988	17524320	16910566	17250070	16785030	18292994	16908332	0.0322466		M+H	9.42073	633.473
Lipidomics	Lysophosphatidylcholine(acyl)	LPC(a-28:0)	0.319648	0.000206578	2.66399e+06	851539	3.31309e+06	2.76252e+06	2.75008e+06	2114364	2.37987e+06	486722	938911	1.01803e+06	1067979	746058	1.53392e+06	1.8871e+06	1.77304e+06	1.57172e+06	1.56624e+06	1.31119e+06	0.119922		M+H	9.58438	663.52
Lipidomics	Lysophosphatidylcholine(alk)	LPC(e-16:0)	1.07905	0.633311	6.90373e+06	7.44949e+06	8564137	5.65496e+06	7315655	6758679	6225197	6772708	6.31941e+06	11277892	6753725	6123706	5830738	6125293	6.01755e+06	6.43009e+06	6.07938e+06	6.11718e+06	0.0453108		M+H	7.93392	481.351
Lipidomics	Lysophosphatidylcholine(alk)	LPC(e-18:0)	0.716342	0.0630945	3872100	2.77375e+06	5017279	3.0637e+06	4.52491e+06	3.57845e+06	3.17617e+06	2.35143e+06	2.44774e+06	4084168	2.37504e+06	2610366	2.69416e+06	2.62507e+06	2.80437e+06	2724242	2.70479e+06	2.92428e+06	0.0380529		M+H	8.40868	509.383
Lipidomics	Lysophosphatidylcholine(alk)	LPC(e-18:1)	1.08131	0.696942	7.99578e+06	8.64588e+06	10309006	6622947	8835793	7382212	6.82895e+06	7457809	7234172	14332615	7.45223e+06	6.75258e+06	6651313	6809279	6.91626e+06	7218330	7269583	7124722	0.0334286		M+H	8.04246	507.368
Lipidomics	Lysophosphatidylcholine(alk)	LPC(e-18:1)	1.15885	0.475695	4.64757e+06	5.38584e+06	6016655	3.80747e+06	5355281	4254953	3.80349e+06	4.72349e+06	4526936	8824159	4269272	4585328	4.05174e+06	4.04333e+06	3.97148e+06	4199226	4.18159e+06	4333754	0.0313667		M+H	8.40745	507.367
Lipidomics	Lysophosphatidylcholine(alk)	LPC(e-18:2)	2.72519	0.00142186	3.56328e+06	9710606	4357976	3016780	3928093	3.38366e+06	3.12988e+06	8541862	8833578	13196654	9016270	8964666	5605115	5454661	5489527	6059109	5994265	5544836	0.043826		M+H	8.04399	505.352
Lipidomics	Lysophosphatidylcholine(alk)	LPC(e-20:0)	1.11093	0.617682	496300	551353	590177	444429	508256	486950	451687	517203	428621	941381	399647	469913	393861	475986	371728	499548	591113	420559	0.171613		M+H	8.82344	537.414
Lipidomics	Lysophosphatidylethanolamine(acyl)	LPE(a-16:0)	1.25306	0.404434	1.05868e+07	13265817	15580344	9671365	11878892	8668459	7134738	10572787	10261799	23685486	10297005	11512008	13024860	13385647	13525022	14067518	16404620	17014924	0.136711		M-H	7.63501	453.285
Lipidomics	Lysophosphatidylethanolamine(acyl)	LPE(a-16:0)	1.34167	0.335396	5.7759e+07	7.74936e+07	81543976	49527232	67722624	47087636	42913484	55186276	56764140	145532096	60941460	69044144	71230648	73771432	80909656	83536448	90740160	89405136	0.106747		M-H	7.74721	453.285
Lipidomics	Lysophosphatidylethanolamine(acyl)	LPE(a-16:1)	1.79885	0.228315	947046	1.7036e+06	1.47323e+06	781483	1.11783e+06	746383	616296	1.04328e+06	1.11654e+06	3.78313e+06	1.15184e+06	1.42319e+06	1.37397e+06	1.46404e+06	1.61846e+06	1.74048e+06	1.86528e+06	2021958	0.147216		M-H	7.35708	451.269
Lipidomics	Lysophosphatidylethanolamine(acyl)	LPE(a-16:1)	1.87021	1.80951e-05	655172	1.22531e+06	788987	704960	618406	656141	507369	1.14479e+06	1181625	1.38375e+06	1.20519e+06	1.2112e+06	932174	917537	978998	928661	1.05126e+06	1.17945e+06	0.113459		M-H	7.23323	451.269
Lipidomics	Lysophosphatidylethanolamine(acyl)	LPE(a-17:0)	1.28603	0.584498	162181	208570	273363	125782	211936	106347	93476.7	122394	124429	496319	141247	158463	247111	240187	256570	248708	258568	293574	0.0811438		M-H	7.9034	467.301
Lipidomics	Lysophosphatidylethanolamine(acyl)	LPE(a-17:0)	1.06835	0.808135	1.31758e+06	1.40763e+06	2.01098e+06	1.09158e+06	1.47966e+06	1.04717e+06	958516	1.06143e+06	998400	2.5903e+06	1.12636e+06	1.26166e+06	1.51881e+06	1.63163e+06	1.77103e+06	1.74973e+06	1.76291e+06	1.87652e+06	0.0798703		M-H	8.00855	467.301
Lipidomics	Lysophosphatidylethanolamine(acyl)	LPE(a-17:1)	2.78692	0.0386491	59045.9	164556	100298	67322.7	85134	0	42474.5	115688	112746	303201	132707	158438	116616	105714	127407	153643	168602	168030	0.195266		M-H	7.63393	465.286
Lipidomics	Lysophosphatidylethanolamine(acyl)	LPE(a-18:0)	1.38079	0.498767	2.21071e+07	3.05254e+07	35396696	16602253	29447708	15526999	13562046	17693420	17577760	73101616	18549548	25704534	27845596	29664754	34027372	36852340	38680156	42663804	0.159453		M-H	8.13525	481.316
Lipidomics	Lysophosphatidylethanolamine(acyl)	LPE(a-18:0)	1.13384	0.548283	2.10004e+08	2.38111e+08	277171968	182331584	238163264	183205760	169148272	185593968	188615760	391672032	196059840	228612384	237302208	242216128	252665728	266363296	280845632	285796960	0.0835073		M-H	8.24884	481.316
Lipidomics	Lysophosphatidylethanolamine(acyl)	LPE(a-18:1)	1.56873	0.182035	4.34097e+07	6.8098e+07	63705728	37254952	51132024	34204732	30750896	50575096	52911160	127394896	51852744	57756212	60791264	63382280	67378504	69119528	74453168	78307120	0.102397		M-H	7.88447	479.3
Lipidomics	Lysophosphatidylethanolamine(acyl)	LPE(a-18:1)	1.47762	0.00108708	3.53018e+07	52162540	43101120	36968212	33804576	34205712	28429224	53254944	51491184	55156732	50167664	50742176	45380640	46391596	45966820	44059208	50109176	52588384	0.0798394		M-H	7.77666	479.3
Lipidomics	Lysophosphatidylethanolamine(acyl)	LPE(a-18:2)	1.23491	0.64925	1.82385e+06	2.2523e+06	3.19063e+06	1.47613e+06	2.13108e+06	1.24856e+06	1.07287e+06	1254131	1.3441e+06	5.46164e+06	1.51336e+06	1.68827e+06	2.31803e+06	2.16832e+06	2.61834e+06	2.87016e+06	3.22034e+06	2.94566e+06	0.17417		M-H	7.56863	477.285
Lipidomics	Lysophosphatidylethanolamine(acyl)	LPE(a-18:2)	1.09532	0.637113	1.27262e+06	1.39392e+06	1.77311e+06	1224594	1302696	1.07139e+06	991327	1.10903e+06	1.14393e+06	2.19448e+06	1.3542e+06	1.16798e+06	1.32188e+06	1.39333e+06	1584581	1.47064e+06	1.6165e+06	1.52044e+06	0.0989726		M-H	7.45876	477.285
Lipidomics	Lysophosphatidylethanolamine(acyl)	LPE(a-18:3)	0.836692	0.760712	37010.8	30966.6	62430.2	30444.6	48750.1	23492.7	19936.4	0	34681.3	93452	26699.8	0	39829.6	31940.8	51801.2	58707.4	59945.6	58849.7	0.247615		M-H	7.28694	475.269
Lipidomics	Lysophosphatidylethanolamine(acyl)	LPE(a-19:1)	4.2242	0.00398502	60229.9	254423	104639	21410.3	56982	78880.9	39237.1	244395	219596	386192	162226	259706	121093	172762	203857	219876	236843	217949	0.208216		M-H	8.11165	493.316
Lipidomics	Lysophosphatidylethanolamine(acyl)	LPE(a-19:1)	2.24146	0.000227455	94556.4	211945	90657.3	136085	79978.8	98468.3	67592.4	224288	218272	156720	228701	231742	168454	186440	161107	134742	180519	216529	0.171069		M-H	8.01173	493.316
Lipidomics	Lysophosphatidylethanolamine(acyl)	LPE(a-20:0)	1.2095	0.334284	162715	196804	174217	150796	83675.1	255440	149448	247742	221579	198663	159671	156367	197057	206192	170058	147354	157440	245772	0.214127		M-H	8.5812	509.349
Lipidomics	Lysophosphatidylethanolamine(acyl)	LPE(a-20:1)	2.51844	0.00164876	3.91859e+06	9.86873e+06	5966839	3.32709e+06	4164621	3.52102e+06	2613358	8425758	9060538	13729607	8489796	9637954	7497522	8116365	8218287	8.36776e+06	9314057	9513504	0.0992212		M-H	8.33626	507.332
Lipidomics	Lysophosphatidylethanolamine(acyl)	LPE(a-20:1)	2.00971	0.00735937	1.03214e+07	2.07431e+07	12225039	12527547	7883797	10672513	8298136	24930904	22531182	11880059	21216724	23156420	14952027	16006228	15227832	13867486	15061919	17676504	0.0848424		M-H	8.24492	507.331
Lipidomics	Lysophosphatidylethanolamine(acyl)	LPE(a-20:2)	1.70203	0.00612703	750897	1278051	1.1105e+06	747412	789960	609013	497597	1.18688e+06	1.28718e+06	1.6525e+06	1.11259e+06	1151110	1.02965e+06	1.01018e+06	1.11108e+06	1.14021e+06	1.24518e+06	1.388e+06	0.139034		M-H	8.04711	505.316
Lipidomics	Lysophosphatidylethanolamine(acyl)	LPE(a-20:2)	1.0317	0.795532	837949	864512	1.02325e+06	997606	763437	799467	605983	1.00197e+06	929000	639212	852510	899874	840171	940486	811748	812867	917226	1.09642e+06	0.12055		M-H	7.95738	505.316
Lipidomics	Lysophosphatidylethanolamine(acyl)	LPE(a-20:3)	1.43219	0.22431	1.7811e+06	2.55088e+06	2.6682e+06	1.53827e+06	2.07658e+06	1456460	1.166e+06	1.85419e+06	2.08042e+06	4541326	1.97751e+06	2.30094e+06	2.3954e+06	2483836	2683495	2.74977e+06	2.96941e+06	3.29635e+06	0.128756		M-H	7.78824	503.3
Lipidomics	Lysophosphatidylethanolamine(acyl)	LPE(a-20:4)	1.38422	0.526269	3.20031e+07	4.42992e+07	56720428	22546116	42622812	21798270	16327946	23911286	25516552	109917416	26337208	35813620	45362748	46031544	52061088	55344092	60901424	66668216	0.166334		M-H	7.58382	501.284
Lipidomics	Lysophosphatidylethanolamine(acyl)	LPE(a-20:4)	1.10419	0.2475	6.06139e+07	6.6929e+07	72972936	60560256	62513312	57673864	49349148	61442668	62041852	78104568	62066680	70989328	64038212	64763336	68780208	66490908	73424112	78747728	0.0947371		M-H	7.48395	501.285
Lipidomics	Lysophosphatidylethanolamine(acyl)	LPE(a-20:5)	1.53285	0.47644	270705	414949	441268	209161	345367	199844	157883	174163	166362	1.11894e+06	282316	332960	356820	389820	423594	479486	480913	611588	0.199798		M-H	7.2836	499.269
Lipidomics	Lysophosphatidylethanolamine(acyl)	LPE(a-20:5)	1.00033	0.997801	484246	484407	537477	504354	477129	500098	402172	340128	381950	587348	547259	565352	441673	503529	539510	480896	546847	545849	0.0888337		M-H	7.18018	499.269
Lipidomics	Lysophosphatidylethanolamine(acyl)	LPE(a-22:1)	1.41157	0.010913	579985	818690	766795	595333	539558	585926	412311	846625	843685	782634	758887	861621	591221	782353	723208	656619	767316	761494	0.123654		M-H	8.73498	535.366
Lipidomics	Lysophosphatidylethanolamine(acyl)	LPE(a-22:2)	1.44852	0.476511	138814	201075	242459	292712	158899	0	0	283902	254464	0	151877	315132	294594	271870	218225	233547	201398	236077	0.168371		M-H	8.40363	533.347
Lipidomics	Lysophosphatidylethanolamine(acyl)	LPE(a-22:3)	1.3839	0.419037	77964	107894	132103	104705	0	153012	0	117793	112718	126490	82392	100077	74396	110582	117602	115804	96819.3	145416	0.195394		M-H	8.12178	531.332
Lipidomics	Lysophosphatidylethanolamine(acyl)	LPE(a-22:4)	1.57235	0.303843	9.71437e+06	1.52744e+07	16313749	7078875	12507681	7230253	5.44131e+06	9832208	10135872	32838824	9458500	14106547	15044100	15574280	16839274	17613840	19450616	20687356	0.138619		M-H	7.9906	529.315
Lipidomics	Lysophosphatidylethanolamine(acyl)	LPE(a-22:4)	1.21485	0.0555519	2.82522e+07	3.43221e+07	33203108	31071924	25050844	28473804	23461176	35272084	34153340	28356508	32986338	40842212	30853320	32499028	31832640	30160494	33545652	37316356	0.0852098		M-H	7.90064	529.315
Lipidomics	Lysophosphatidylethanolamine(acyl)	LPE(a-22:5)	1.37154	0.640051	880862	1.20814e+06	1.67466e+06	594472	1.11958e+06	595040	420553	408340	580778	3.66278e+06	568220	820569	1.12735e+06	1.20078e+06	1397271	1.49651e+06	1.57326e+06	1.62575e+06	0.158622		M-H	7.84278	527.3
Lipidomics	Lysophosphatidylethanolamine(acyl)	LPE(a-22:5)	1.20868	0.543635	2.79737e+06	3.38113e+06	4.04858e+06	2.64011e+06	3.08176e+06	2407934	1.80846e+06	2.16327e+06	2.40759e+06	6618071	2690955	3.02576e+06	3232299	3023518	3.54701e+06	3733417	4161466	4420440	0.147772		M-H	7.72536	527.3
Lipidomics	Lysophosphatidylethanolamine(acyl)	LPE(a-22:6)	1.26708	0.565336	7.5338e+07	9.54591e+07	128270000	57531592	94683040	53574920	42630680	57955700	61655188	210603744	64641632	82439224	99853312	101531104	111902680	118424472	130217280	142398720	0.151809		M-H	7.58332	525.285
Lipidomics	Lysophosphatidylethanolamine(acyl)	LPE(a-22:6)	1.0249	0.718615	1.42863e+08	1.4642e+08	170408768	147593712	139027456	135524384	121758424	136951712	137551856	161282144	141059616	155256656	143193184	143357008	152460784	147353456	160843264	175536656	0.0945372		M-H	7.48759	525.285
Lipidomics	Lysophosphatidylethanolamine(alk)	LPE(e-16:1)	1.03504	0.912744	30028866	3.1081e+07	42849948	25432188	39317692	22487646	20056856	21982558	22138674	62908560	22537506	25837640	35969668	36177696	38684236	39957508	42411468	44895704	0.096182		M-H	7.98662	437.29
Lipidomics	Lysophosphatidylethanolamine(alk)	LPE(e-17:1)	1.43179	0.383828	893502	1.27931e+06	1.44334e+06	659192	1.1206e+06	686499	557878	929397	788698	2.76194e+06	984410	932101	1.04095e+06	1.21409e+06	1136931	1.41695e+06	1.5895e+06	1.68258e+06	0.187079		M-H	8.21376	451.306
Lipidomics	Lysophosphatidylethanolamine(alk)	LPE(e-18:1)	1.1474	0.630721	7.97052e+07	9.14538e+07	113231048	67975336	94343816	64824128	58151768	65109068	66995048	173148176	67504264	84512360	93611072	94222272	106627424	110808416	116461912	118799968	0.110717		M-H	8.45496	465.322
Lipidomics	Lysophosphatidylethanolamine(alk)	LPE(e-18:2)	1.99921	0.0114654	4.95328e+07	9.90264e+07	65986304	43662224	55687252	41650720	40677444	85015136	84252376	147085280	86808448	91970712	77636320	80442168	85166440	87828104	94022536	94555344	0.0827108		M-H	8.09159	463.305
Lipidomics	Lysophosphatidylethanolamine(alk)	LPE(e-18:3)	0.853799	0.617768	556266	474939	792440	439373	699907	447799	401809	381724	294844	1.00509e+06	321311	371730	520390	520644	647291	641740	718652	737657	0.160324		M-H	7.80231	461.29
Lipidomics	Lysophosphatidylethanolamine(alk)	LPE(e-20:1)	1.10556	0.524096	2.17548e+06	2.40512e+06	2680215	1.99953e+06	2.41838e+06	1.91521e+06	1.86405e+06	1.96912e+06	1.98874e+06	3553686	2063581	2450461	2206734	2.36262e+06	2.56104e+06	2.62961e+06	2.85933e+06	2.80399e+06	0.101709		M-H	8.86235	493.352
Lipidomics	Lysophosphatidylethanolamine(alk)	LPE(e-20:2)	4.61736	0.00477825	563770	2.60313e+06	840120	446370	638131	376674	517557	2.06882e+06	2360564	4.03105e+06	1.92444e+06	2.63079e+06	1.15802e+06	1.41904e+06	1.7099e+06	1.7256e+06	1.927e+06	1.91769e+06	0.175767		M-H	8.52599	491.337
Lipidomics	Lysophosphatidylethanolamine(alk)	LPE(e-22:2)	2.29084	0.0117585	121674	278735	153803	122751	131588	122467	77759.5	242582	177212	403336	257015	313532	171467	177702	193107	240434	193955	296296	0.206429		M-H	8.90878	519.368
Lipidomics	Lysophosphatidylglycerol(acyl)	LPG(a-16:0)	1.80897	0.0388415	1.40901e+06	2.54885e+06	1.88163e+06	1.34242e+06	1619879	1.14134e+06	1.05977e+06	1.82105e+06	2234379	4048359	2.26731e+06	2.37316e+06	1.68496e+06	1.75747e+06	2.05323e+06	2.14368e+06	2.61903e+06	2.62182e+06	0.19166		M-H	7.18686	484.28
Lipidomics	Lysophosphatidylglycerol(acyl)	LPG(a-16:0)	1.78022	0.00659522	2.0362e+06	3.62489e+06	2.04202e+06	2.28512e+06	2143757	1.79116e+06	1.91894e+06	3554401	4.29268e+06	2.42519e+06	3787045	4.06516e+06	2.457e+06	2417466	2.61704e+06	2.61001e+06	2.95421e+06	2.85175e+06	0.074607		M-H	7.08182	484.28
Lipidomics	Lysophosphatidylglycerol(acyl)	LPG(a-16:1)	2.79623	0.0665893	269838	754527	401209	254998	313413	188916	190652	453761	594937	1.52482e+06	565347	633772	445851	443025	539343	556368	707148	726020	0.217663		M-H	6.81138	482.263
Lipidomics	Lysophosphatidylglycerol(acyl)	LPG(a-16:1)	1.79661	0.0160357	801914	1.44073e+06	701593	892202	809248	844208	762319	1.51085e+06	1730038	804572	1549064	1609111	926689	892955	1.02325e+06	993501	1.06377e+06	1.05981e+06	0.0675417		M-H	6.70822	482.263
Lipidomics	Lysophosphatidylglycerol(acyl)	LPG(a-18:0)	1.77768	0.0121556	1.51257e+06	2.68886e+06	2.03899e+06	1.6582e+06	1.52995e+06	1.25465e+06	1.08106e+06	2.09695e+06	2.30668e+06	3.79559e+06	2.56678e+06	2.6783e+06	1.74603e+06	1.86466e+06	2.22254e+06	2.36205e+06	2548899	2559823	0.174379		M-H	7.66216	512.311
Lipidomics	Lysophosphatidylglycerol(acyl)	LPG(a-18:0)	1.61186	0.00300765	1.01731e+06	1.63976e+06	1.01928e+06	1.09318e+06	988385	1.01208e+06	973620	1.60744e+06	1.84567e+06	1.26387e+06	1.71184e+06	1.76999e+06	1.12779e+06	1.18528e+06	1.32647e+06	1.21716e+06	1.25354e+06	1.43112e+06	0.0785912		M-H	7.55895	512.31
Lipidomics	Lysophosphatidylglycerol(acyl)	LPG(a-18:1)	2.05066	0.0542284	5.3561e+06	10983539	7895938	4703627	6.64901e+06	3.97533e+06	3.55662e+06	7913951	9679472	19359008	8612636	9352628	7124323	7.66819e+06	8838574	9302700	11408027	11905136	0.208714		M-H	7.31819	510.295
Lipidomics	Lysophosphatidylglycerol(acyl)	LPG(a-18:1)	1.44754	0.023978	1.59434e+07	23078775	15886407	17444468	15745996	14867988	15772292	24367554	28264032	15713299	24274046	22774944	16472874	16757397	17392160	17904210	19993870	19336386	0.080128		M-H	7.21809	510.295
Lipidomics	Lysophosphatidylglycerol(acyl)	LPG(a-18:2)	1.54469	0.213496	826640	1.27691e+06	1.39729e+06	762751	983530	467681	521956	837261	1.09226e+06	2.38132e+06	1.01717e+06	1.05651e+06	941969	1.00846e+06	1.28058e+06	1.30265e+06	1.54973e+06	1.54565e+06	0.210072		M-H	7.00808	508.278
Lipidomics	Lysophosphatidylglycerol(acyl)	LPG(a-18:2)	1.17269	0.312653	3.42267e+06	4.01372e+06	3.44103e+06	4286160	3.19323e+06	2.81917e+06	3.37376e+06	4496848	5.13478e+06	2.3022e+06	4.33817e+06	3796582	3.04959e+06	3036756	3.14622e+06	3206010	3681905	3.57464e+06	0.0828206		M-H	6.9171	508.278
Lipidomics	Lysophosphatidylglycerol(acyl)	LPG(a-20:1)	2.81431	0.00963269	254669	716718	448247	205122	280424	156987	182565	580231	644493	1147395	553476	657996	442408	499107	500369	488815	585932	571609	0.123776		M-H	7.72793	538.324
Lipidomics	Lysophosphatidylglycerol(acyl)	LPG(a-20:1)	2.22792	0.010137	837914	1.86681e+06	867187	970547	815584	801450	734802	2.16167e+06	2.13349e+06	953939	2.06212e+06	2.02281e+06	1165984	1.0614e+06	1.13764e+06	1.21247e+06	1.36186e+06	1.29838e+06	0.0985305		M-H	7.65344	538.325
Lipidomics	Lysophosphatidylglycerol(acyl)	LPG(a-22:5)	3.20654	0.00219935	75530.1	242190	80683.4	58592.1	99269.4	54901	84204.8	170086	283615	221682	215294	320275	173498	152522	160366	161054	179949	169334	0.119771		M-H	7.17716	558.294
Lipidomics	Lysophosphatidylglycerol(acyl)	LPG(a-22:6)	2.03293	0.096173	7.17505e+06	1.45863e+07	11784022	5.7466e+06	8849101	5.43549e+06	4.06002e+06	8950900	11128556	27684918	10668840	14498510	10938661	11179051	12824896	13614120	16065774	16444003	0.180501		M-H	7.02447	556.279
Lipidomics	Lysophosphatidylglycerol(acyl)	LPG(a-22:6)	1.37748	0.0526114	24392460	33600052	24362882	26013748	24254036	23299834	24031800	33548360	37443980	20648608	36517968	39841344	24767700	24635192	25914654	26937292	29350340	28798182	0.0740559		M-H	6.93902	556.279
Lipidomics	Lysophosphatidylinositol(acyl)	LPI(a-16:0)	1.08402	0.526186	7.26271e+06	7.8729e+06	7.97133e+06	7525841	7912601	6.05713e+06	6.84665e+06	6302311	6.86521e+06	10930195	7039991	8226786	7.26702e+06	7.51537e+06	8411080	8335727	8773704	8899394	0.083752		M-H	7.10113	572.295
Lipidomics	Lysophosphatidylinositol(acyl)	LPI(a-16:0)	1.24434	0.0124023	1.40911e+06	1.75342e+06	1.4917e+06	1.39551e+06	1.53745e+06	1.27327e+06	1.34764e+06	1.66595e+06	1.95276e+06	1.49923e+06	1.706e+06	1.94314e+06	1.48988e+06	1.40687e+06	1432245	1.3856e+06	1.57584e+06	1.54225e+06	0.0479053		M-H	6.98485	572.295
Lipidomics	Lysophosphatidylinositol(acyl)	LPI(a-16:1)	1.81072	0.119129	29250.4	52964.2	59778.1	23095	44034.7	9873.24	9470.92	30618	49603.3	86593.9	43427.7	54578.2	41815.6	58843.7	41376.7	47676.5	67833.6	85984.4	0.277179		M-H	6.72428	570.279
Lipidomics	Lysophosphatidylinositol(acyl)	LPI(a-18:0)	1.31751	0.506759	1.45711e+06	1.91976e+06	2.08903e+06	1200438	1.93782e+06	1.08326e+06	975022	1.2416e+06	1.25965e+06	4.33185e+06	1.21598e+06	1549697	1.80084e+06	1.90206e+06	1.84797e+06	1.99678e+06	2.1986e+06	2.1752e+06	0.100314		M-H	7.48003	600.326
Lipidomics	Lysophosphatidylinositol(acyl)	LPI(a-18:0)	0.932224	0.593693	32989060	3.07532e+07	36888232	35334736	34063400	28105088	30553844	25240688	26515498	44799768	26915696	30294372	31307808	31413744	34789112	34859520	35486804	38280440	0.0789757		M-H	7.58613	600.326
Lipidomics	Lysophosphatidylinositol(acyl)	LPI(a-18:1)	1.11981	0.284243	8.71926e+06	9.7639e+06	9776450	9654728	9290662	6976382	7898075	8912753	9227457	12637083	9000385	9041806	8925429	9274797	9936954	10019646	10760718	10709372	0.0837079		M-H	7.23385	598.311
Lipidomics	Lysophosphatidylinositol(acyl)	LPI(a-18:1)	1.27826	0.06112	2.83547e+06	3.62448e+06	3135014	2.78045e+06	2.89806e+06	2.64519e+06	2.71865e+06	3.47783e+06	4187360	2.49617e+06	3839731	4.12128e+06	2.97762e+06	2939432	3.08414e+06	3.08959e+06	3236335	3.23523e+06	0.0383909		M-H	7.12727	598.31
Lipidomics	Lysophosphatidylinositol(acyl)	LPI(a-18:2)	1.04078	0.892781	148551	154609	186579	254233	23203.5	115912	162830	181166	154558	200602	86578.3	150140	146184	122220	168933	166531	85261.8	209058	0.290293		M-H	6.92312	596.294
Lipidomics	Lysophosphatidylinositol(acyl)	LPI(a-20:3)	0.962901	0.85618	184806	177950	186035	230424	133503	197036	177032	150401	165578	80177.9	221347	272247	193382	165838	173419	208486	137658	70655.2	0.28454		M-H	7.03936	622.309
Lipidomics	Lysophosphatidylinositol(acyl)	LPI(a-20:4)	1.30997	0.550975	1.10059e+07	1.44174e+07	17366712	9678796	14163124	7.6068e+06	6.21425e+06	8313492	8427974	33959140	8918759	12467751	14074930	14365633	15893234	17766150	19501348	19708884	0.158045		M-H	6.94233	620.294
Lipidomics	Lysophosphatidylinositol(acyl)	LPI(a-20:4)	0.940549	0.370978	37704750	3.54632e+07	38700608	44593664	38215532	32860362	34153584	34032524	34635616	33478974	35705736	39462972	34737408	33732124	35988328	36865052	38909140	38745972	0.0584576		M-H	6.85179	620.294
Lipidomics	Lysophosphatidylinositol(acyl)	LPI(a-22:6)	1.60543	0.269841	1.02283e+06	1.64208e+06	1.7182e+06	936825	1306196	607920	544982	1.06452e+06	981228	3.42498e+06	1.17005e+06	1.56959e+06	1.38147e+06	1523392	1.68723e+06	1.92556e+06	2.00175e+06	2092737	0.16184		M-H	6.94893	644.294
Lipidomics	Lysophosphatidylinositol(acyl)	LPI(a-22:6)	1.30303	0.088641	2.79535e+06	3.64242e+06	2.74336e+06	3.51863e+06	2524916	2.46384e+06	2725982	3840172	3735845	2.25739e+06	3.88048e+06	4498212	2.5846e+06	2.59182e+06	2.76879e+06	2868304	2.94259e+06	2.98329e+06	0.0569903		M-H	6.86469	644.294
Lipidomics	Lysophosphatidylserine(acyl)	LPS(a-16:0)	1.0261	0.940075	85213.3	87437.7	129098	76141.4	94215.2	59587	67024.4	58396.6	68912.9	188757	53906.5	67215.5	85409.3	74992.7	80353.9	91783.6	114265	108254	0.16921		M-H	6.98969	497.274
Lipidomics	Lysophosphatidylserine(acyl)	LPS(a-16:0)	0.926018	0.749469	1.19026e+06	1.1022e+06	1612031	1.06226e+06	1302363	986571	988088	798989	816499	2.02929e+06	874056	992187	1.24523e+06	1.25123e+06	1.43799e+06	1.44227e+06	1.48955e+06	1.53184e+06	0.0880212		M-H	7.10882	497.274
Lipidomics	Lysophosphatidylserine(acyl)	LPS(a-16:1)	3.5232	0.0294589	23082.1	81322.7	28209.8	20973.9	27355.6	16042.7	22828.4	50175.2	70839.9	149506	58833.8	77258.8	44523.2	63918.6	47171.5	73705.6	57874	60627.7	0.174587		M-H	6.62548	495.259
Lipidomics	Lysophosphatidylserine(acyl)	LPS(a-16:1)	2.36439	0.319862	22701.3	53674.6	31778.3	21956.3	33352.1	9378.93	17040.7	14395.5	29361.3	160549	21579.7	42487.5	41139.5	36854	46544.5	43782.1	50778.2	57147.7	0.164423		M-H	6.72829	495.259
Lipidomics	Lysophosphatidylserine(acyl)	LPS(a-18:0)	1.18029	0.603439	3.68101e+07	4.34467e+07	53831792	31890836	40500256	30463258	27364216	30118876	31061588	87449896	32165050	36437916	40335564	42759068	46575272	46960040	49279276	55638880	0.12476		M-H	7.59648	525.304
Lipidomics	Lysophosphatidylserine(acyl)	LPS(a-18:1)	1.89665	0.273041	5.63281e+06	1.06835e+07	9539805	4425082	6.83738e+06	3.90526e+06	3.45653e+06	6349483	6.2887e+06	26253668	6517062	8008462	8285139	8539878	9784988	10437985	11129652	11842380	0.153925		M-H	7.24373	523.29
Lipidomics	Lysophosphatidylserine(acyl)	LPS(a-18:1)	1.52913	0.0129918	8.72229e+06	1.33375e+07	10685599	8478484	9583178	7483546	7380644	11647680	11825665	17784872	11739878	13689607	11320223	11624027	12024407	12732358	13056238	12982188	0.0619847		M-H	7.14147	523.29
Lipidomics	Lysophosphatidylserine(acyl)	LPS(a-18:2)	1.47969	0.41029	109008	161297	176050	85843.5	125957	96347.6	60840.6	131772	102413	378064	81541	112695	175898	147450	197420	160830	193921	214609	0.147272		M-H	6.8722	521.274
Lipidomics	Lysophosphatidylserine(acyl)	LPS(a-20:0)	1.89478	0.261969	95481.6	180917	266440	29376.1	181591	0	0	150696	147580	359324	124157	122826	167656	140523	195918	168106	255015	283993	0.253045		M-H	8.00608	553.337
Lipidomics	Lysophosphatidylserine(acyl)	LPS(a-20:1)	1.18972	0.307307	117740	140077	150909	112037	132806	97868.8	95078.9	110976	152287	198148	100965	138009	127577	151383	93862	111450	165089	133051	0.181043		M-H	7.56564	551.321
Lipidomics	Lysophosphatidylserine(acyl)	LPS(a-20:1)	1.62615	0.346579	171081	278204	267575	148604	209547	128007	101671	182991	180495	668084	145081	214367	211397	237049	225056	273291	281282	272923	0.108201		M-H	7.65981	551.321
Lipidomics	Lysophosphatidylserine(acyl)	LPS(a-20:2)	1.00278	0.992138	46560.6	46690.1	71529.7	35722.5	59009.8	27857.4	38683.4	47650.8	27557.6	82795.9	30670.9	44775.2	63574.3	65497.6	45408.9	63457.3	71907.7	65205.2	0.178638		M-H	7.3206	549.306
Lipidomics	Lysophosphatidylserine(acyl)	LPS(a-20:2)	1.37151	0.497252	56731	77807	96550.6	52400.2	58741.2	34909.6	41053.4	57813.5	56640.6	184461	48760.1	41359.6	77543.5	78473.3	74030.4	96920.3	91989.9	113251	0.1589		M-H	7.4066	549.306
Lipidomics	Lysophosphatidylserine(acyl)	LPS(a-20:3)	1.74122	0.399126	77062.3	134183	124445	61926.2	87904.7	64265.9	46769.7	56798.5	68172.1	368870	59078.3	117994	138371	105580	129107	150553	148266	169719	0.170661		M-H	7.13745	547.289
Lipidomics	Lysophosphatidylserine(acyl)	LPS(a-20:3)	0.956778	0.815993	161172	154205	187426	157316	185224	144612	131281	124648	115475	255857	121119	153928	215897	218474	212114	225746	180802	254588	0.107387		M-H	7.04976	547.289
Lipidomics	Lysophosphatidylserine(acyl)	LPS(a-20:4)	2.71356	0.32938	478312	1.29793e+06	959204	269621	633926	284503	244308	500693	476533	4.21866e+06	515786	777966	874584	939264	1.0205e+06	1.15657e+06	1.23449e+06	1.35176e+06	0.181896		M-H	6.94361	545.274
Lipidomics	Lysophosphatidylserine(acyl)	LPS(a-20:4)	1.6012	0.115453	1.55357e+06	2.48758e+06	2151807	1257636	1.83342e+06	1.36847e+06	1156534	2.04903e+06	1.94787e+06	4.2448e+06	1.68103e+06	2.51518e+06	2271182	2.15252e+06	2.37897e+06	2608171	2645917	2.65815e+06	0.0921735		M-H	6.85657	545.274
Lipidomics	Lysophosphatidylserine(acyl)	LPS(a-21:0)	0.708555	0.198057	227413	161135	198111	282950	86912.4	327606	241485	227601	140545	132144	124126	181257	194174	272673	276028	164723	151794	228222	0.226181		M-H	8.03618	567.353
Lipidomics	Lysophosphatidylserine(acyl)	LPS(a-22:4)	1.53259	0.471587	1.28059e+06	1.96262e+06	2.28049e+06	888657	1.62882e+06	910454	694523	1.02129e+06	944720	5237369	1.08358e+06	1.52613e+06	1.89039e+06	1919656	2.04883e+06	2.24774e+06	2.52843e+06	2.63655e+06	0.169956		M-H	7.34342	573.306
Lipidomics	Lysophosphatidylserine(acyl)	LPS(a-22:4)	1.39162	0.226678	1.1199e+06	1.55849e+06	1.57241e+06	995254	1.33151e+06	892375	807969	1.26731e+06	1.16334e+06	2693805	1.15603e+06	1.51195e+06	1532174	1.54468e+06	1.6741e+06	1.7334e+06	1.73515e+06	1.89186e+06	0.0842478		M-H	7.25551	573.306
Lipidomics	Lysophosphatidylserine(acyl)	LPS(a-22:5)	1.36821	0.704205	72747.9	99534.6	172629	33701.9	94703.8	33501.9	29203.4	35539.6	38273.8	343392	34688.4	45778.6	79940.9	85999	111067	111118	147035	147484	0.283806		M-H	7.19738	571.291
Lipidomics	Lysophosphatidylserine(acyl)	LPS(a-22:5)	0.957908	0.90693	363238	347948	581194	273926	446838	290815	223414	232216	206021	774053	248083	279368	346932	388193	472593	501069	554235	546619	0.176686		M-H	7.1	571.291
Lipidomics	Lysophosphatidylserine(acyl)	LPS(a-22:6)	1.43148	0.589939	1.30844e+07	18730115	24452806	9140742	17330952	8119302	6378344	8345820	8031143	55403040	8937154	12933418	17363998	17914230	20730884	22937184	24385710	25629996	0.177778		M-H	6.94952	569.274
Lipidomics	Lysophosphatidylserine(acyl)	LPS(a-22:6)	0.991338	0.952039	3.38757e+07	3.35823e+07	43230488	32919334	36889032	27501608	28838030	28507700	28432842	48266552	29977218	32727092	34902032	34647056	37029480	39098536	40390256	42944900	0.088729		M-H	6.86317	569.275
Lipidomics	Lysophosphatidylserine(acyl)	LPS(a-23:0)	0.936285	0.832055	343228	321359	420231	428150	312719	555038	0	417708	274929	324698	283200	306260	438601	434756	535428	405077	412379	480350	0.101687		M-H	8.47951	595.383
Lipidomics	Lysophosphatidylserine(acyl)	LPS(a-24:2)	1.40632	0.505994	961267	1.35185e+06	1.45341e+06	738740	1.29362e+06	693599	626959	731885	776713	3398643	734638	1.11737e+06	1.27473e+06	1.16575e+06	1.21914e+06	1.52185e+06	1.49654e+06	1.69254e+06	0.184687		M-H	7.73906	605.368
Lipidomics	Lysophosphatidylserine(acyl)	LPS(a-24:3)	1.58659	0.474368	1.58441e+07	2.5138e+07	27694068	10823971	21696532	10574838	8430873	11856346	12315768	70481144	13037440	17999334	22058768	22047996	25780836	27697600	30038438	30974276	0.16135		M-H	7.52618	603.352
Lipidomics	Lysophosphatidylserine(acyl)	LPS(a-26:0)	1.65532	0.00307378	1.16108e+06	1.92196e+06	1.63364e+06	851727	1.18044e+06	1.17829e+06	961308	1984035	1.76957e+06	2.05327e+06	1.88381e+06	1.91909e+06	1.58823e+06	1470092	1.4391e+06	1.49156e+06	1.74878e+06	1.48075e+06	0.0881831		M-H	8.6949	637.431
Lipidomics	Lysophosphatidylserine(acyl)	LPS(a-27:0)	21.5225	0.000156204	24379.9	524717	0	121900	0	0	0	460888	481111	714329	422443	544816	353377	355040	292857	313202	321847	304832	0.12272		M-H	8.88555	651.446
Lipidomics	Lysophosphatidylserine(acyl)	LPS(a-28:3)	0.580488	0.337097	76247.7	44260.8	149437	77870.3	89563.4	0	64367.9	50443.3	20856.8	117568	0	32436.3	93277.2	44750.5	81798.3	114494	104760	93617.9	0.292277		M-H	8.25119	659.415
Lipidomics	Lysophosphatidylserine(acyl)	LPS(a-28:3)	1.92197	0.488633	56659.3	108897	127074	40664	101812	0	13746.3	60994.4	51241.5	366743	0	65508	147155	94826.4	148109	123454	78920.8	87700.1	0.255435		M-H	8.32819	659.415
Lipidomics	Monoacylglycerol(acyl)	MG(a-16:0)	0.808147	0.0436842	1.41384e+07	11425893	12514329	16070651	12772644	12911670	16422612	11356788	12355470	8682402	11989974	12744831	13600151	12886222	13219252	13198961	13365362	12995189	0.0181863		M+Na	8.20047	330.277
Lipidomics	Monoacylglycerol(acyl)	MG(a-18:0)	1.08321	0.359232	40637316	4.40188e+07	43680456	39462600	43248000	35597292	41198232	37219360	42525428	55349108	40791284	44208712	38569800	39862420	41793840	41923084	41488912	41874688	0.0322468		M+Na	8.66802	358.308
Lipidomics	Monoacylglycerol(acyl)	MG(a-18:1)	1.30034	0.114337	1.81696e+07	2.36268e+07	20645144	17771060	15322952	18940448	18168552	21873756	21539500	34320440	20629428	19770628	19425930	19593916	19009334	20214708	16956698	17222248	0.0660453		M+Na	8.32828	356.292
Lipidomics	Monoacylglycerol(acyl)	MG(a-18:2)	1.07542	0.738031	593535	638297	726768	617425	476377	588628	558476	581776	485329	1.08279e+06	652613	388982	578903	562182	600161	572480	546144	533960	0.0574097		M+Na	8.01122	354.276
Lipidomics	Monoacylglycerol(acyl)	MG(a-20:2)	0.836104	0.456152	246025	205703	242720	210129	212832	276519	287928	141709	194316	391068	152221	149201	243190	130925	211354	107942	182404	176550	0.258733		M+Na	8.47644	382.308
Lipidomics	Monoacylglycerol(acyl)	MG(a-20:4)	0.914098	0.0922474	5.50881e+07	5.03559e+07	52168288	52837872	52494616	61451320	56488160	47251448	54278420	45533960	51047268	53668360	51686692	52123376	52555280	52317316	51767308	51438280	0.00864664		M+Na	8.0198	378.277
Lipidomics	Monoacylglycerol(acyl)	MG(a-22:4)	1.00162	0.987206	3.46185e+06	3.46747e+06	3583933	3.11095e+06	3.2539e+06	3853560	3.50692e+06	2766638	3.08628e+06	4445823	3.12985e+06	3.90876e+06	3.172e+06	3210655	3223838	3.19105e+06	3.38619e+06	3.19967e+06	0.0235814		M+Na	8.3948	406.308
Lipidomics	Monoacylglycerol(acyl)	MG(a-22:6)	0.973677	0.650372	1.50856e+07	1.46885e+07	16013020	14103748	12515434	16670550	16125116	13789876	15390783	14417935	15143616	14700168	14543593	15073156	15132997	15450553	14636166	14102368	0.0314768		M+Na	8.01206	402.277
Lipidomics	Monoacylglycerol(acyl)	MG(a-24:1)	0.269313	0.000177806	1.9174e+06	516380	2.43141e+06	1.98819e+06	1.87599e+06	1.65995e+06	1.63144e+06	467126	527964	709391	567865	309553	1316858	925834	937100	1226346	1.46632e+06	1.09567e+06	0.170961		M+Na	9.48926	440.385
Lipidomics	Monoacylglycerol(alk)	MG(e-18:0)	0.624143	0.00853452	291183	181740	248694	241261	262638	365243	338079	164192	141200	187172	202471	213664	296579	279843	241960	209263	237998	232929	0.131741		M+Na	8.92454	344.328
Lipidomics	Monoacylglycerol(alk)	MG(e-18:1)	0.926829	0.346594	1.57094e+06	1455990	1.48287e+06	1.53314e+06	1.58543e+06	1.59287e+06	1.66036e+06	1.7271e+06	1.53793e+06	1552823	1.35836e+06	1.10373e+06	1.44739e+06	1.54297e+06	1.60584e+06	1.55904e+06	1.37203e+06	1.45441e+06	0.0618232		M+Na	8.59169	342.313
Lipidomics	Monoacylglycerol(alk)	MG(e-18:2)	3.31806	0.0217114	221121	733692	200257	155760	271642	252064	225880	465890	654844	1.27718e+06	565517	705032	491863	402312	443344	316704	363239	410751	0.137417		M+Na	8.61491	340.297
Lipidomics	Monolysocardiolipin	MLCL(aaa-52:3)	0.269198	0.0509221	1.39693e+06	376052	1665983	1837404	1.13815e+06	1309180	1.03395e+06	1880260	0	0	0	0	966904	774161	1.21948e+06	1.21683e+06	1.05523e+06	1.53786e+06	0.272384		M-H	9.68541	1164.75
Lipidomics	Monolysocardiolipin	MLCL(aaa-54:4)	0.45919	0.000566182	3.27553e+06	1.50409e+06	4030446	3.5359e+06	2.68313e+06	3193847	2934324	2.13473e+06	1.44753e+06	1.74822e+06	827026	1.36293e+06	2.2255e+06	2.93298e+06	2.29521e+06	1.8585e+06	3181504	2620876	0.179994		M-H	9.71106	1190.77
Lipidomics	Monolysocardiolipin	MLCL(aaa-54:6)	0.605526	0.000118327	64246212	3.89028e+07	60294896	71217136	56934436	65810052	66974540	30265204	38252120	40027088	39231768	46737584	61943916	63162312	63008216	71127952	62523560	56508040	0.0766281		M-H	9.51166	1186.74
Lipidomics	Monolysocardiolipin	MLCL(aaa-56:7)	0.498869	0.00235065	18585128	9.27154e+06	18678098	19366576	13837448	19611064	21432454	7642529	9989457	3.83607e+06	13081621	11808033	15662452	28164776	19550224	19614170	20611728	13459622	0.270881		M-H	9.5848	1212.75
Lipidomics	Monolysocardiolipin	MLCL(aaa-56:8)	0.673748	0.00227823	38836720	2.61662e+07	41334980	40522720	34783728	35763064	41779108	22644218	34040096	24157946	21813772	28174814	36497324	41189048	32779494	39863740	38290656	34981240	0.0768283		M-H	9.52538	1210.74
Lipidomics	Monolysocardiolipin	MLCL(aaa-56:9)	0.401602	0.000301815	18894122	7.58792e+06	20310434	19610192	20031244	15292778	19225962	9458181	6747920	2.68845e+06	10997174	8047858	10775379	14605038	13356904	13018302	17328186	10940244	0.167973		M-H	9.43505	1208.72
Lipidomics	Monolysocardiolipin	MLCL(aaa-58:8)	0.667769	0.0605037	1.31638e+06	879037	1547377	1.29754e+06	1.22642e+06	1.30434e+06	1.20621e+06	444258	1.05431e+06	666993	793743	1.43588e+06	1.28757e+06	1566951	1.2707e+06	1.31734e+06	1.6466e+06	1.05129e+06	0.148749		M-H	9.67744	1238.77
Lipidomics	Monolysocardiolipin	MLCL(aaa-58:9)	0.678651	0.0242828	3.47613e+07	2.35908e+07	36361412	31064402	24870284	39327904	42182480	22347514	23729374	18349096	20403228	33124692	32786464	41229752	29846708	33326886	29355910	34825056	0.125455		M-H	9.58656	1236.75
Lipidomics	Monolysocardiolipin	MLCL(aaa-58:10)	0.437019	0.000296738	5.48974e+07	2.39912e+07	59034452	63917416	43019424	48739568	59776216	27209704	14481494	21430820	27739896	29094260	34543084	43049076	40166160	37808768	51802320	40674432	0.130054		M-H	9.51002	1234.74
GC/MS	Phe pathway	Phenylalanine	0.884496	0.0150494	3.7548e+06	3.32111e+06	3940440	3603398	3444782	4053663	3731713	3124549	3417725	3414789	3523729	3124741	2594356	2836341	2906952	3535127	3566254	3326683	0.122248
Lipidomics	Phosphatidic acid(acyl)	PA(aa-28:0)	1.83914	7.24903e-05	321781	591799	318939	369715	279737	291126	349386	496611	569963	625662	625219	641541	492703	387780	466270	479596	392112	550897	0.13873		M-H	8.88043	592.409
Lipidomics	Phosphatidic acid(acyl)	PA(aa-30:1)	1.73011	0.000196414	314516	544147	293766	309231	329669	333236	306676	478107	512873	600098	576317	553340	461860	387177	480148	326760	441989	358248	0.139456		M-H	8.9539	618.423
Lipidomics	Phosphatidic acid(acyl)	PA(aa-32:1)	2.81356	0.000117233	1.57303e+07	4.42581e+07	17487848	14703189	16305626	15151527	15003134	36406964	44629348	49849520	44460000	45944576	28272276	26758056	27794596	27860024	29190944	29619844	0.036169		M-H	9.09209	646.455
Lipidomics	Phosphatidic acid(acyl)	PA(aa-32:2)	2.06265	0.0100892	406612	838700	473265	0	564882	471468	523445	775614	1.01262e+06	854159	745914	805194	801164	543801	803348	480851	528234	706588	0.223283		M-H	9.01075	644.439
Lipidomics	Phosphatidic acid(acyl)	PA(aa-34:0)	1.54584	0.264791	2.06605e+07	31937777	16761018	18037270	35283520	12540757	20679928	49514232	27955856	8804059	51803200	21611538	17606084	21169072	19403820	13151515	16336878	19312748	0.164224		M-H	9.56493	676.502
Lipidomics	Phosphatidic acid(acyl)	PA(aa-34:1)	1.94261	3.83759e-07	1.7133e+08	3.32827e+08	179342112	175772544	164548976	160653072	176333728	318272480	350886016	317786400	335386592	341804096	251746608	251344048	259210960	255710160	261764624	252723408	0.0156737		M-H	9.25169	674.486
Lipidomics	Phosphatidic acid(acyl)	PA(aa-34:2)	1.76726	8.07226e-05	2.06063e+07	3.64167e+07	18675876	22970608	22130244	18611614	20643314	33649332	39791244	40573300	34080784	33988964	26731140	30076494	29611356	28178160	27658854	28393106	0.04338		M-H	9.16711	672.471
Lipidomics	Phosphatidic acid(acyl)	PA(aa-36:1)	1.93003	0.0744966	730894962	1410645748	606229310	625542780	1253449340	547071680	622181700	2148767230	1311394050	691776830	1960056580	941234050	995357500	887321410	745531840	754784960	730199550	689579970	0.148038		M-H	9.5575	702.518
Lipidomics	Phosphatidic acid(acyl)	PA(aa-36:2)	0.872111	0.131119	2.83336e+08	2.47101e+08	268435072	274555776	354566912	263309504	255815232	261164544	251948512	246610896	268505536	207274816	209306304	217430464	218042400	229973696	234639968	227890576	0.0470643		M-H	9.48748	700.504
Lipidomics	Phosphatidic acid(acyl)	PA(aa-36:4)	1.77475	9.46371e-05	7.25867e+07	1.28823e+08	65819496	78365784	80827600	58469360	79451168	119204496	146378800	138339376	114655112	125538800	101136368	118359120	114930992	113218608	104379216	121284496	0.066486		M-H	9.15044	696.471
Lipidomics	Phosphatidic acid(acyl)	PA(aa-36:5)	1.84646	0.00143444	2.69417e+06	4.97469e+06	2300180	3032650	1602622	3301193	3.23423e+06	3.87024e+06	6.07672e+06	5018806	4.85845e+06	5049225	3873041	4.45199e+06	2929804	3.2925e+06	3791026	4.18024e+06	0.144467		M-H	9.05608	694.456
Lipidomics	Phosphatidic acid(acyl)	PA(aa-38:1)	1.02912	0.743381	5.0079e+06	5.1537e+06	5188944	5129758	4846098	4372548	5.50214e+06	5718194	5741155	3.68593e+06	5411834	5211406	4.85509e+06	5.62108e+06	5455386	5.07213e+06	5.02855e+06	5.45871e+06	0.0538974		M-H	9.86298	730.548
Lipidomics	Phosphatidic acid(acyl)	PA(aa-38:2)	1.32797	0.00613172	1.84861e+07	2.4549e+07	19695028	19135388	17324298	17448244	18827666	26541402	23843614	19890208	26124772	26344842	20904710	21303120	22531552	21792306	22828982	23728052	0.050144		M-H	9.69217	728.534
Lipidomics	Phosphatidic acid(acyl)	PA(aa-38:3)	1.75679	0.213437	9241490	1.62353e+07	8413082	7180644	18420896	5.80768e+06	6.38515e+06	27766264	9770334	6.90181e+06	26303738	10434558	7.89577e+06	7119365	8.36626e+06	7042487	8867741	8.21771e+06	0.0894534		M-H	9.61128	726.518
Lipidomics	Phosphatidic acid(acyl)	PA(aa-38:4)	0.728101	0.0082368	1587635840	1155959858	1463616380	1418022660	1972627070	1539187330	1544725760	1270525950	1064189310	1051356670	1321876350	1071851010	1134283650	1148298110	1140151550	1198057470	1194380160	1157596030	0.0217704		M-H	9.51991	724.502
Lipidomics	Phosphatidic acid(acyl)	PA(aa-40:4)	2.21151	0.000565679	1.02514e+07	2.26711e+07	10813884	10534296	9682925	9124735	11101116	24215850	20139756	19179392	22869268	26951222	15526015	16757976	17783818	16318758	16304235	18025856	0.0614352		M-H	9.69513	752.534
Lipidomics	Phosphatidic acid(acyl)	PA(aa-40:6)	0.566658	0.013364	1.02423e+08	5.80386e+07	90459848	98039408	146003136	88791168	88819488	60878344	51638216	56094576	69474552	52107136	56246364	61556776	63177536	66589492	65716112	72139824	0.0759228		M-H	9.53195	748.502
Lipidomics	Phosphatidylcholine(acyl)	PC(aa-30:0)	0.854981	0.00638151	1131855718	967715660	1132702980	1177459970	1106195580	1083955710	1158964350	965969600	1021581820	831472640	1004480900	1015073340	994551870	988471940	992088320	1023654660	1026361790	984159170	0.0170863		M+H	9.75963	705.53
Lipidomics	Phosphatidylcholine(acyl)	PC(aa-30:1)	1.09015	0.337575	5.89564e+08	6.42713e+08	526197248	608089220	579351360	612269950	621911940	695894020	742652540	468870016	676814080	629334460	584710660	603097860	615454980	588832510	579921660	585087870	0.0246514		M+H	9.55625	703.515
Lipidomics	Phosphatidylcholine(acyl)	PC(aa-30:2)	1.09078	0.255227	7.66726e+06	8.36329e+06	7.94318e+06	8815232	7900691	7001841	6675377	9132784	9569638	8080385	7.56198e+06	7471649	8.05737e+06	8462243	8.19891e+06	8117005	8824208	8224292	0.0333841		M+H	9.40044	701.5
Lipidomics	Phosphatidylcholine(acyl)	PC(aa-31:0)	0.684595	5.57349e-08	1.16543e+08	7.97847e+07	116933944	119507384	117247344	117011336	112013968	80393984	81738504	83362752	78021104	75407008	96419768	94914248	95611320	96126704	98812072	101000000	0.021733		M+H	9.88354	719.547
Lipidomics	Phosphatidylcholine(acyl)	PC(aa-31:1)	0.514005	0.0126181	6.61845e+06	3.40191e+06	6.35507e+06	6358558	5950683	5.41199e+06	9015955	3.92443e+06	4.38596e+06	999893	5354281	2.34499e+06	3.60438e+06	2969208	5062380	4.85148e+06	4.76736e+06	4168724	0.177311		M+H	9.71588	717.531
Lipidomics	Phosphatidylcholine(acyl)	PC(aa-31:2)	0.886964	0.211502	9.50733e+06	8.43266e+06	10194887	10828527	8745980	9187305	8579974	8731267	8742362	10435734	7.77465e+06	6479282	7698906	8857987	7733397	8761920	7.85969e+06	7933383	0.0638597		M+H	9.53436	715.514
Lipidomics	Phosphatidylcholine(acyl)	PC(aa-32:0)	0.933404	0.0378393	4708848640	4395259580	4528955900	4777976300	4800070100	4728160800	4709080100	4534350300	4511709700	3977488900	4505733600	4447015400	4455860200	4568828900	4641394200	4679342100	4546701300	4637202400	0.0241816		M+H	10.0207	733.562
Lipidomics	Phosphatidylcholine(acyl)	PC(aa-32:1)	1.0405	0.233821	3301822974	3435544114	3189223420	3423351040	3266196480	3237059070	3393284860	3450772990	3530727420	3083780350	3559415300	3553024510	3312814340	3269221380	3346431740	3410379780	3375808510	3301088000	0.0178981		M+H	9.83445	731.546
Lipidomics	Phosphatidylcholine(acyl)	PC(aa-32:2)	1.24944	0.143293	146388928	1.82904e+08	140703152	159401264	140287680	130506224	161046320	203116128	224909440	107747896	194224432	184521168	151850736	153223328	156116960	154297840	155837264	157502496	0.0122551		M+H	9.66794	729.53
Lipidomics	Phosphatidylcholine(acyl)	PC(aa-32:3)	0.687923	0.00642556	8.76855e+07	60320852	86550176	91812192	87025288	86407040	86632800	73906752	69282240	43351720	60672848	54390700	70742464	69106264	66551952	71197264	72195696	67064864	0.0307272		M+H	9.52186	727.514
Lipidomics	Phosphatidylcholine(acyl)	PC(aa-32:4)	1.91674	9.37405e-05	2.0351e+06	3.90077e+06	2.32667e+06	2.13308e+06	1.77821e+06	1.82758e+06	2.10998e+06	4.41017e+06	4049617	3474928	3474037	4095100	2.98804e+06	2.47111e+06	2.65166e+06	2.46236e+06	2652271	2.30729e+06	0.0833583		M+H	9.36281	725.5
Lipidomics	Phosphatidylcholine(acyl)	PC(aa-33:0)	0.571458	4.52492e-09	7.49005e+07	4.28025e+07	76191488	74236552	73459248	75042016	75573104	41076072	45013232	41866064	44098696	41958500	59267824	59689248	58375016	63775920	61578092	58742048	0.0322109		M+H	10.1422	747.578
Lipidomics	Phosphatidylcholine(acyl)	PC(aa-33:1)	1.03763	0.250469	5.9578e+07	61819980	61552456	59099512	58603056	59928608	58706512	59547248	62548612	66578008	63352236	57073796	60575296	56874016	61165748	60720780	61707056	62506520	0.0315741		M+H	9.96739	745.563
Lipidomics	Phosphatidylcholine(acyl)	PC(aa-33:2)	0.745411	0.0636014	5.79034e+06	4.31619e+06	6507804	6935264	5.3211e+06	3971200	6216335	4215513	2.81006e+06	5206182	5.12845e+06	4220723	3932464	4354051	4643015	5598710	5.55839e+06	3.37376e+06	0.198646		M+H	9.7912	743.547
Lipidomics	Phosphatidylcholine(acyl)	PC(aa-34:0)	0.725909	3.31394e-05	3602141390	2614828392	3597790980	3654270720	3550577150	3566861060	3641207040	2521500160	2606299140	2475257090	2629494270	2841591300	3207757570	3220803330	3157883140	3178742020	3138525700	3186855170	0.00917683		M+H	10.2541	761.593
Lipidomics	Phosphatidylcholine(acyl)	PC(aa-34:1)	1.02053	0.375341	7175127560	7322413080	7198411300	7252651500	7331142100	7153226800	6940206100	7623140400	7565165600	6911543800	7423648300	7088567300	7277499400	7384451100	7162294300	7177488400	7363057200	7409739300	0.013769		M+H	10.0758	759.577
Lipidomics	Phosphatidylcholine(acyl)	PC(aa-34:2)	0.90734	0.0227711	1321118898	1198703512	1397136000	1375386110	1297410300	1254798850	1280863230	1259159420	1206979070	1180033790	1265080830	1082264450	1211015550	1206012160	1240316930	1244128380	1274001540	1265162370	0.021383		M+H	9.89781	757.56
Lipidomics	Phosphatidylcholine(acyl)	PC(aa-34:3)	0.796058	0.00974466	1.82767e+08	1.45493e+08	191029712	200400112	169088336	163455536	189859968	155707248	148972016	115286624	164801840	142696688	154561088	149621472	157448640	157990880	156134592	156626464	0.0185514		M+H	9.73553	755.546
Lipidomics	Phosphatidylcholine(acyl)	PC(aa-34:4)	0.798641	0.0247073	143795232	1.14841e+08	140042352	150885792	141678576	143103264	143266176	141261760	122534320	90235520	112708016	107464536	118010000	123164944	122180048	119817360	117131792	118128784	0.0191568		M+H	9.54718	753.53
Lipidomics	Phosphatidylcholine(acyl)	PC(aa-34:5)	0.993945	0.953391	1.42995e+07	1.42129e+07	12878455	16909276	13810310	14432412	13467184	15948284	17457138	10196860	14293535	13168922	12349928	14241628	13197775	13026267	12778444	12327703	0.0548222		M+H	9.50664	751.514
Lipidomics	Phosphatidylcholine(acyl)	PC(aa-35:0)	0.723188	0.000212699	41262240	2.98403e+07	43077212	41343480	40845260	39461100	41584148	27246444	31080804	26532912	31596010	32745512	28999890	35364016	31765586	34145692	32951798	35971792	0.0706847		M+H	10.3567	775.609
Lipidomics	Phosphatidylcholine(acyl)	PC(aa-35:1)	1.11143	0.000452248	2.63911e+08	2.93318e+08	272864704	267229664	264070288	255685504	259705776	284609280	291562624	298237344	305911232	286271008	277383488	281860128	283253248	280193728	266448624	281996704	0.0206924		M+H	10.201	773.593
Lipidomics	Phosphatidylcholine(acyl)	PC(aa-35:2)	1.21657	0.0181957	5.71228e+06	6.94938e+06	5562897	5265877	6163173	6.16977e+06	5399666	6458583	7.45707e+06	6157248	8005846	6668142	6664168	5984447	6.47156e+06	6616232	6819199	7.89663e+06	0.0871303		M+H	10.0433	771.577
Lipidomics	Phosphatidylcholine(acyl)	PC(aa-35:5)	1.10628	0.357461	2.97348e+07	3.28952e+07	31119532	30392532	30043756	28742092	28376264	34925308	32427748	43197796	26110942	27814032	26927712	27836240	28517892	30914636	28837140	29977892	0.0460176		M+H	9.54015	765.53
Lipidomics	Phosphatidylcholine(acyl)	PC(aa-36:0)	0.40611	1.61898e-09	242742336	9.858e+07	229397952	248933584	246590912	246203040	242586192	101590176	100884032	86409232	100378056	103638752	155307504	163322368	167535344	165347856	155309264	156375488	0.0314211		M+H	10.4285	789.623
Lipidomics	Phosphatidylcholine(acyl)	PC(aa-36:1)	1.05915	0.00197295	9567805220	10133754280	9676529700	9599327200	9750686700	9466534900	9345947600	10316722200	10285004800	10236051500	10030356500	9800636400	9797663700	9779011600	9629622300	9806670800	9941570600	10003254300	0.0123548		M+H	10.3022	787.608
Lipidomics	Phosphatidylcholine(acyl)	PC(aa-36:2)	1.04682	0.0761402	1813878042	1898808780	1824451070	1822157700	1778749180	1813707010	1830325250	1913944700	1945104770	1903022460	1969071620	1762900350	1842519040	1877024000	1857480700	1886307200	1885694590	1852311810	0.00916012		M+H	10.1598	785.593
Lipidomics	Phosphatidylcholine(acyl)	PC(aa-36:3)	0.963775	0.279151	471332448	4.54259e+08	469596032	481504128	465963264	464986016	474612800	433093152	457258848	417537696	494645504	468757568	463214816	459206496	475502016	469244608	469196704	478707296	0.0146298		M+H	9.99623	783.576
Lipidomics	Phosphatidylcholine(acyl)	PC(aa-36:4)	0.966094	0.156951	3548600114	3428280830	3477137410	3537754620	3604614140	3604078340	3519416060	3451811070	3433274110	3214129920	3400895230	3641293820	3391488770	3357500420	3452940540	3458455040	3445861380	3507995390	0.0149764		M+H	9.92112	781.56
Lipidomics	Phosphatidylcholine(acyl)	PC(aa-36:5)	0.996045	0.956229	122882096	1.22396e+08	118168848	128961000	123161656	117337680	126781296	102939184	125378800	104439600	140094112	139129008	121010056	113568464	120838544	128470160	128616576	121896264	0.0436028		M+H	9.79802	779.545
Lipidomics	Phosphatidylcholine(acyl)	PC(aa-37:0)	0.597223	5.14152e-06	1.83422e+07	1.09544e+07	18081886	18141196	18089550	17997444	19400710	11347957	11166742	9143438	11698068	11415612	13962810	14293173	14544888	14321668	14343260	13805550	0.0349373		M+H	10.552	803.642
Lipidomics	Phosphatidylcholine(acyl)	PC(aa-37:1)	1.4564	8.91027e-05	3.96283e+08	577147570	406402144	390078272	396411296	393501536	395019968	559603260	586652800	538862140	587697090	612922560	494881824	493784736	487370240	481308352	495902144	492660160	0.0137979		M+H	10.3953	801.624
Lipidomics	Phosphatidylcholine(acyl)	PC(aa-37:2)	1.68096	1.45175e-05	17265679	2.90229e+07	18306612	17698282	18634870	16335132	15353499	28097130	29240384	28326982	32424592	27025280	22821002	21696820	23251146	22182022	21244468	24619692	0.0518306		M+H	10.2645	799.608
Lipidomics	Phosphatidylcholine(acyl)	PC(aa-37:4)	0.699254	0.0122325	7.53798e+06	5.27096e+06	7.2199e+06	6275064	7.50109e+06	9484580	7209249	4204363	5.24462e+06	4.91044e+06	5027344	6.96803e+06	7357227	7013790	6628413	7709680	7173680	7987887	0.0716225		M+H	10.0457	795.577
Lipidomics	Phosphatidylcholine(acyl)	PC(aa-38:0)	0.151389	2.01029e-10	92201592	1.39583e+07	90176560	91961160	96178144	89090224	93601872	15675587	14857132	10675196	14840899	13742639	53668804	57296464	54653216	53948608	57623832	55590212	0.0279433		M+H	10.6373	817.657
Lipidomics	Phosphatidylcholine(acyl)	PC(aa-38:1)	0.731065	1.54615e-05	4075497164	2979453644	4129097470	4113235710	4156539650	4008800770	3969812220	3182899710	3018010620	2718054660	3005616380	2972686850	3420452860	3471642620	3421479420	3419019520	3462371840	3466897150	0.0122061		M+H	10.481	815.638
Lipidomics	Phosphatidylcholine(acyl)	PC(aa-38:2)	0.923085	0.00181076	1084197492	1000806068	1090952580	1078607870	1048531520	1092480640	1110414850	1005897860	1006751360	948862400	1035488260	1007030460	1017043200	1064444610	1039230270	1031591100	1026485950	1044462080	0.0172692		M+H	10.3562	813.624
Lipidomics	Phosphatidylcholine(acyl)	PC(aa-38:3)	0.95588	0.198562	421107328	402528128	410044320	431962400	414057344	420077216	429395360	367648384	400751424	394526784	408925408	440788640	419087040	420786080	416128000	425334880	406921952	423326144	0.0152497		M+H	10.2485	811.606
Lipidomics	Phosphatidylcholine(acyl)	PC(aa-38:4)	0.972477	0.0451297	4289877502	4171808146	4300825600	4246855420	4282664190	4303570400	4315471900	4106895870	4096996350	4150572540	4175994370	4328581600	4249105920	4243027970	4270469630	4291745540	4353287200	4363571200	0.0117546		M+H	10.1583	809.591
Lipidomics	Phosphatidylcholine(acyl)	PC(aa-38:5)	1.00294	0.961194	985445902	988346100	930172030	979586300	961170500	1012798980	1043501700	1014263040	1020705220	780907070	1082300290	1043554880	994273220	1001861250	1046715330	1018960510	987533760	1017538820	0.0193597		M+H	9.992	807.575
Lipidomics	Phosphatidylcholine(acyl)	PC(aa-38:6)	1.03064	0.167936	6439977480	6637286700	6643894300	6502769200	6419896300	6276134400	6357193200	6658134500	6596468200	6328889900	6588119000	7014821900	6327907800	6221328900	6332591600	6441375200	6632550900	6532742100	0.0216148		M+H	9.85494	805.56
Lipidomics	Phosphatidylcholine(acyl)	PC(aa-38:7)	1.12032	0.288224	350171968	392303536	336568992	364508608	342193984	328608576	378979680	420734848	442868224	259115760	406420608	432378240	339516224	349263808	353420544	348565952	348043328	344477760	0.013728		M+H	9.70182	803.545
Lipidomics	Phosphatidylcholine(acyl)	PC(aa-38:8)	0.858753	0.0925405	39151524	3.36215e+07	39062464	42707976	39217184	38490980	36279016	39456964	34064336	24531438	36410804	33643864	33925444	37368092	36650320	35396240	34400320	36183016	0.0341989		M+H	9.55086	801.529
Lipidomics	Phosphatidylcholine(acyl)	PC(aa-39:3)	1.48162	0.000164036	5.29276e+06	7.84188e+06	4.78724e+06	4830606	4.98728e+06	5965247	5893441	7390485	7659589	7163640	8556095	8439613	5907325	6321708	7419738	7064012	5324930	6114021	0.113529		M+H	10.3502	825.622
Lipidomics	Phosphatidylcholine(acyl)	PC(aa-39:4)	1.3874	0.00388706	8.52331e+06	1.18253e+07	9595003	6938088	10454891	7.93692e+06	7.69162e+06	11918637	10723082	12339581	11283260	12861811	10295742	10556119	8923711	9243467	11187543	8.32932e+06	0.102739		M+H	10.2637	823.608
Lipidomics	Phosphatidylcholine(acyl)	PC(aa-39:6)	0.881403	0.205296	6.80882e+06	6.00132e+06	6787816	5.74164e+06	8456388	6877403	6180844	5621864	4846443	6090630	6727338	6720302	5.65065e+06	6333429	5648824	5762705	6039156	7681367	0.172791		M+H	10.0262	819.576
Lipidomics	Phosphatidylcholine(acyl)	PC(aa-39:7)	0.861028	0.221885	3.65288e+06	3.14523e+06	3.84494e+06	4.51807e+06	3.29662e+06	3.08307e+06	3521697	2.71925e+06	3.5545e+06	2.23206e+06	3.44e+06	3.78035e+06	3.18793e+06	3.98688e+06	3236551	3.82419e+06	3.33363e+06	3.20974e+06	0.0952166		M+H	9.85506	817.56
Lipidomics	Phosphatidylcholine(acyl)	PC(aa-39:8)	0.599399	0.0301414	275047	164863	254447	317486	268616	163472	371214	142928	170101	130479	184277	196529	216313	168088	202060	250316	201367	129383	0.220905		M+H	9.68012	815.545
Lipidomics	Phosphatidylcholine(acyl)	PC(aa-40:0)	0.220892	3.26427e-07	6.26454e+07	1.38379e+07	67546112	65921060	59766164	58336096	61657320	14100618	14916332	10492393	13869104	15810960	38207640	36707380	40224540	41392900	36492128	38921512	0.0467767		M+H	10.8008	845.687
Lipidomics	Phosphatidylcholine(acyl)	PC(aa-40:1)	0.626163	2.60386e-06	2922563994	1830002174	3126106370	2855236610	2939131900	2811857920	2880487170	2055252220	1821636990	1651354880	1732805760	1888961020	2307345150	2327811840	2339752190	2359901950	2321981440	2285801470	0.0135991		M+H	10.6676	843.671
Lipidomics	Phosphatidylcholine(acyl)	PC(aa-40:2)	0.862687	0.00118232	1653419494	1426382796	1775040130	1654337020	1640510210	1585994110	1611216000	1510297600	1448683520	1308524160	1429171070	1435237630	1495894400	1498872320	1470670720	1494760320	1546886400	1524232700	0.021213		M+H	10.5198	841.653
Lipidomics	Phosphatidylcholine(acyl)	PC(aa-40:3)	0.844566	0.000784352	2.06745e+08	174609744	207915360	214200416	204827712	202484848	204295952	171548816	179512720	159000320	177919584	185067280	187810048	189032464	186623984	185696576	182027040	190002240	0.0173554		M+H	10.4102	839.638
Lipidomics	Phosphatidylcholine(acyl)	PC(aa-40:4)	0.966223	0.246838	883446054	853606310	876025790	878612290	864824130	907858940	889909120	824186690	823143620	833676800	849513340	937511100	857726340	861888000	860235010	856462270	863193220	869214080	0.00487646		M+H	10.3402	837.622
Lipidomics	Phosphatidylcholine(acyl)	PC(aa-40:5)	1.08648	0.218	85424840	9.28126e+07	78922840	88725296	83424816	84516928	91534320	89375792	92729576	77876808	96320336	107760312	93710936	96643456	92730968	89425288	92872448	96244896	0.0278642		M+H	10.2324	835.607
Lipidomics	Phosphatidylcholine(acyl)	PC(aa-40:6)	0.987053	0.616824	2034506802	2008166094	2080020350	2029822460	2002257540	2010739070	2049694590	1852146690	1980435710	2001716350	2078066180	2128465540	2003507970	2027049340	2017805570	2023572740	2036181120	2026304770	0.00628979		M+H	10.1408	833.592
Lipidomics	Phosphatidylcholine(acyl)	PC(aa-40:7)	1.02265	0.711423	604318464	6.18009e+08	591056640	607605890	596037120	607299330	619593340	613950020	645176060	488857056	683860220	658200510	617108420	615193600	635652480	616458300	627353410	629303170	0.0130789		M+H	9.971	831.576
Lipidomics	Phosphatidylcholine(acyl)	PC(aa-40:8)	0.864155	0.109364	3.10176e+08	2.6804e+08	343475584	340137120	293653440	272019968	301593184	301597696	274703776	196936560	293662848	273298848	278421920	272812800	276720672	291367488	291435552	285358496	0.0254729		M+H	9.78587	829.561
Lipidomics	Phosphatidylcholine(acyl)	PC(aa-40:9)	0.781927	4.68952e-06	7.33393e+07	5.7346e+07	77065552	74322296	72590872	71621112	71096632	58019564	54167688	60265848	56680612	57596236	66160664	64923032	63828740	66513656	67632800	65384616	0.031406		M+H	9.66082	827.544
Lipidomics	Phosphatidylcholine(acyl)	PC(aa-42:0)	0.44966	0.00160992	5.73632e+06	2.57939e+06	6941586	5939295	6548270	4.18439e+06	5068055	2.9648e+06	2.53645e+06	1.86316e+06	2.43454e+06	3098020	4.01145e+06	3729839	4.47671e+06	4.24427e+06	4.33601e+06	4.13278e+06	0.0581324		M+H	10.9353	873.718
Lipidomics	Phosphatidylcholine(acyl)	PC(aa-42:1)	0.419926	4.3958e-08	3244533452	1362465102	3458490110	3194732540	3297452540	3096889860	3175102210	1520987780	1305357700	1198415360	1253767680	1533796990	2290664450	2257455620	2325299460	2357302020	2407553540	2319226370	0.0257803		M+H	10.8256	871.702
Lipidomics	Phosphatidylcholine(acyl)	PC(aa-42:2)	0.814554	0.000353193	1805375668	1470575822	1944529020	1734941700	1851416320	1725501060	1770490240	1561596290	1489479170	1378243460	1383665150	1539895040	1591998340	1577084420	1570388480	1611481600	1611184260	1565981950	0.014805		M+H	10.6805	869.686
Lipidomics	Phosphatidylcholine(acyl)	PC(aa-42:3)	0.477765	2.41848e-08	1.63716e+08	78217800	171193568	161091616	164317888	159748448	162228768	80780736	77502976	74693104	79590992	78521192	109459368	112836288	114062944	116391896	118847640	115476576	0.0343381		M+H	10.567	867.67
Lipidomics	Phosphatidylcholine(acyl)	PC(aa-42:4)	0.734226	1.48332e-05	369904000	271593232	357076736	364519232	379347424	383555968	365020640	264251136	272246528	253307760	268802784	299357952	307940864	311962688	315538784	306336960	312040352	310028192	0.0111703		M+H	10.4668	865.653
Lipidomics	Phosphatidylcholine(acyl)	PC(aa-42:5)	0.873542	0.0328895	2.74278e+08	2.39593e+08	277755872	266657280	265686320	280899008	280390208	240645536	232857696	206629600	241665616	276167648	251369088	260808384	250146592	246688768	260019840	259421696	0.0244035		M+H	10.3851	863.639
Lipidomics	Phosphatidylcholine(acyl)	PC(aa-42:6)	0.865059	0.0170919	76360176	6.60561e+07	71985224	75683128	72420320	83620768	78091440	62752584	60575216	61999496	72282808	72670368	70272928	77075840	73672560	70782928	73096416	72863408	0.0373586		M+H	10.3244	861.623
Lipidomics	Phosphatidylcholine(acyl)	PC(aa-42:7)	1.1115	0.086423	6.36445e+07	7.07407e+07	66007196	64008664	62183584	62868652	63154216	72568936	76620088	58516824	72527280	73470128	68522488	65916008	64197752	69827704	69219600	68860352	0.0299418		M+H	10.1701	859.608
Lipidomics	Phosphatidylcholine(acyl)	PC(aa-42:8)	1.00558	0.947075	1.24012e+07	12470464	12156310	12862809	11747070	12919030	12320818	12658514	11729111	9611588	12781048	15572059	14004552	11678298	12019810	11551400	11404454	11795738	0.0803151		M+H	10.0171	857.593
Lipidomics	Phosphatidylcholine(acyl)	PC(aa-42:9)	0.849501	0.148265	21693528	1.84287e+07	18686714	21309400	20729146	24379378	23363002	16121818	18426420	13320300	22242960	22031836	21475370	22339156	21005376	18946760	20341924	19462936	0.0621749		M+H	9.87819	855.578
Lipidomics	Phosphatidylcholine(acyl)	PC(aa-42:10)	1.03852	0.680946	3.98339e+08	4.13685e+08	406726976	409251232	385517568	385780640	404419008	418058496	405786752	302962144	421886816	519731104	390379136	384418080	385167328	396885152	401434016	391934336	0.017608		M+H	9.77101	853.561
Lipidomics	Phosphatidylcholine(acyl)	PC(aa-42:11)	1.16756	0.230377	2.32535e+07	2.71498e+07	21281042	25335464	22038612	22427056	25185400	25287078	29652868	17394868	31457624	31956416	23336108	24764426	24578132	23594336	24920416	25290956	0.0294093		M+H	9.63449	851.546
Lipidomics	Phosphatidylcholine(acyl)	PC(aa-44:1)	0.301785	1.80392e-08	221997872	66995700	237721360	220429792	226654832	213306528	211876848	71822984	59599348	58122308	60654772	84779088	136971920	138862736	142885088	142183920	136581680	142135264	0.0223256		M+H	10.9647	899.735
Lipidomics	Phosphatidylcholine(acyl)	PC(aa-44:2)	0.572375	2.43197e-07	3.07251e+08	1.75863e+08	326048480	304260096	312678720	294772576	298495904	181314944	176251520	159912624	167047440	194787776	239821984	229932512	237569776	243999936	250256992	240247840	0.0274281		M+H	10.8308	897.716
Lipidomics	Phosphatidylcholine(acyl)	PC(aa-44:6)	0.497532	1.87869e-09	4.77618e+07	2.3763e+07	47891360	47606832	46633752	47306100	49370712	25564522	21949734	23705252	23975468	23620088	36667036	36403352	34412976	34837152	36156208	35666332	0.0229932		M+H	10.5678	889.655
Lipidomics	Phosphatidylcholine(acyl)	PC(aa-44:7)	0.779205	0.00595537	2.86719e+07	2.23413e+07	29076570	28014804	28777172	28930098	28560994	25203980	21663810	18156222	24164296	22518174	23610408	26317002	25306564	23477506	23992886	23556712	0.0458437		M+H	10.3704	887.64
Lipidomics	Phosphatidylcholine(acyl)	PC(aa-44:10)	1.1003	0.501572	4.63515e+06	5.10007e+06	4.37232e+06	5.05724e+06	4.66749e+06	4774494	4304192	4099521	4507618	3906011	5.77293e+06	7214278	4855342	4.97379e+06	4011495	4.62347e+06	5.23268e+06	5611430	0.103036		M+H	9.97419	881.594
Lipidomics	Phosphatidylcholine(acyl)	PC(aa-44:11)	0.966111	0.855911	1.39995e+06	1.35251e+06	1.28498e+06	1.39766e+06	1.36143e+06	1242849	1712836	1.00434e+06	1.2107e+06	761368	1.79562e+06	1.99052e+06	1.34652e+06	1.60376e+06	1.54257e+06	1.51652e+06	1.55086e+06	1.55286e+06	0.0566044		M+H	9.85216	879.578
Lipidomics	Phosphatidylcholine(acyl)	PC(aa-44:12)	1.23562	0.107544	3.51756e+08	4.34636e+08	360539584	364675168	339615200	333590624	360361472	430907552	446263296	293993248	459470272	542547780	363473024	370749600	372471680	368766560	373006240	357348032	0.0155472		M+H	9.74626	877.561
Lipidomics	Phosphatidylcholine(alk)	PC(ae-32:0)	0.751447	2.30635e-06	1.95698e+08	1.47057e+08	196543856	201180272	194583856	190784640	195396272	141319824	151724640	154688672	146718768	140830768	170824640	172561328	169789680	171749088	176658528	178958336	0.0194395		M+H	10.1841	719.583
Lipidomics	Phosphatidylcholine(alk)	PC(ae-34:0)	0.54991	7.36626e-08	858265036	471968640	850476930	855516540	850993470	844526720	889811520	457928416	457962880	447900960	474770528	521280416	667420420	664287170	646081150	636123710	672888830	674803840	0.0221503		M+H	10.3907	747.614
Lipidomics	Phosphatidylcholine(alk)	PC(ae-34:1)	0.869731	0.00898156	886615462	771116930	871132220	884150400	889080320	883505600	905208770	753971010	777953220	830406590	808627460	684626370	839974910	856678020	838694660	835700740	812953280	840125380	0.0153836		M+H	10.2203	745.598
Lipidomics	Phosphatidylcholine(alk)	PC(ae-34:2)	1.08839	0.0458188	9.17822e+07	9.98949e+07	92640048	93035072	93298880	90589160	89347648	99788608	105507888	100715008	104267456	89195512	94128000	95972664	94617192	97843744	92814248	97242240	0.0203467		M+H	10.2098	743.583
Lipidomics	Phosphatidylcholine(alk)	PC(ae-34:5)	1.01175	0.928972	2.02217e+06	2.04594e+06	2.11536e+06	2.25474e+06	1.80894e+06	1.89149e+06	2.04034e+06	2.34759e+06	2506202	1.13838e+06	2.01835e+06	2219205	1.56024e+06	2.14759e+06	2.04154e+06	1714207	1908258	2.07679e+06	0.113667		M+H	9.69134	737.535
Lipidomics	Phosphatidylcholine(alk)	PC(ae-36:0)	0.420546	8.15052e-08	8.17792e+07	3.43919e+07	76741288	84343408	79820976	81362536	86627608	36539736	34549700	30175466	34290620	36404080	55613136	55862904	55096968	55347900	58398408	57923472	0.0360609		M+H	10.575	775.644
Lipidomics	Phosphatidylcholine(alk)	PC(ae-36:1)	0.705062	3.62422e-06	3.24613e+08	2.28872e+08	332761216	314968000	331526400	314712544	329095424	238201392	224622672	211441584	246246048	223848768	268746016	281566720	273769088	286047392	283696064	290005504	0.0323206		M+H	10.4469	773.629
Lipidomics	Phosphatidylcholine(alk)	PC(ae-36:2)	1.19902	6.53683e-06	407038368	4.88046e+08	416332544	393994176	420315200	394443424	410106496	483239808	497997248	487582560	492932576	478476736	440503296	450327680	444415936	436811904	445889184	444368512	0.0152791		M+H	10.4055	771.614
Lipidomics	Phosphatidylcholine(alk)	PC(ae-36:3)	3.37008	1.34001e-05	2.33643e+07	7.87394e+07	24409814	23788722	24192164	22472652	21958060	74961928	86778672	73610848	81969616	76376080	47292952	47130112	45926816	46060656	47623672	48280268	0.0218343		M+H	10.2484	769.598
Lipidomics	Phosphatidylcholine(alk)	PC(ae-36:4)	0.807673	0.0467612	5.4935e+06	4.43695e+06	4.48655e+06	4768087	6133284	6287157	5792417	4.83301e+06	5.18405e+06	4.10926e+06	4.0141e+06	4.04434e+06	5219427	4.9435e+06	4.65958e+06	4.87973e+06	5.53203e+06	5632938	0.0987419		M+H	10.085	767.582
Lipidomics	Phosphatidylcholine(alk)	PC(ae-36:7)	1.04705	0.80893	1.14903e+06	1.20309e+06	1208202	1.41876e+06	1142011	821207	1.15496e+06	1114425	1.80422e+06	605565	1.25494e+06	1.23628e+06	1.17213e+06	1410287	1030836	1.01226e+06	1.26828e+06	1.25545e+06	0.165995		M+H	9.68045	761.536
Lipidomics	Phosphatidylcholine(alk)	PC(ae-38:0)	0.404964	1.17308e-06	1.23563e+07	5.00388e+06	13321743	12011652	12489142	12195572	11763588	5391783	4.98217e+06	4.75392e+06	4.96813e+06	4923382	8529450	8983995	8842328	8940344	8577961	9792788	0.0522421		M+H	10.7406	803.675
Lipidomics	Phosphatidylcholine(alk)	PC(ae-38:2)	1.42697	9.48358e-06	1.30745e+08	1.86569e+08	143121456	130601576	133065576	117565272	129369912	196924416	186114640	180975136	184816304	184014832	151160880	157150496	151579664	157447856	162535168	157599536	0.0285496		M+H	10.5887	799.645
Lipidomics	Phosphatidylcholine(alk)	PC(ae-38:4)	0.813359	0.000706543	21188784	1.72341e+07	20050786	21080440	23325712	20374646	21112336	16814100	15830096	17576792	18078948	17870552	18606124	19342318	20747212	18583764	19523736	20216316	0.0653869		M+H	10.2898	795.614
Lipidomics	Phosphatidylcholine(alk)	PC(ae-38:5)	0.717532	0.0132221	5.68035e+06	4.07583e+06	6436022	5.62232e+06	5.91826e+06	4.8703e+06	5.55483e+06	4645157	4119508	2.56377e+06	4.91391e+06	4.13683e+06	5214458	4.48034e+06	6387170	4.85985e+06	5925854	5.97015e+06	0.138001		M+H	10.1213	793.598
Lipidomics	Phosphatidylcholine(alk)	PC(ae-38:6)	0.895257	0.292009	7.13818e+06	6.39051e+06	8.06838e+06	7.70739e+06	6859855	6578079	6.47722e+06	4.55822e+06	6034239	7361487	7795445	6.20317e+06	4134827	5850133	4531002	6.75148e+06	4960728	5219844	0.204275		M+H	10.0774	791.581
Lipidomics	Phosphatidylcholine(alk)	PC(ae-38:7)	0.874773	0.479188	2847956	2.49132e+06	2461709	2969357	2.78483e+06	3.54953e+06	2474355	2250722	3.42277e+06	998485	2607680	3.17692e+06	2.34674e+06	3451921	3.62207e+06	2.29758e+06	2851939	2.11671e+06	0.259145		M+H	10.0296	789.565
Lipidomics	Phosphatidylcholine(alk)	PC(ae-40:6)	1.34585	0.000980087	9.99238e+06	1.34482e+07	8.15251e+06	10668472	11252225	9713678	10175010	13240230	13525338	12854170	14910784	12710536	10251020	11557906	11089136	10990713	9869080	11438838	0.0584512		M+H	10.2789	819.613
Lipidomics	Phosphatidylethanolamine(acyl)	PE(aa-32:0)	0.720759	0.00258555	1.20118e+07	8.65759e+06	10378967	12942376	13719063	11260650	11757745	9966769	8916300	7002738	8926028	8476092	12468481	10368674	10545046	11076460	9659357	11038467	0.0835089		M-H	10.068	691.514
Lipidomics	Phosphatidylethanolamine(acyl)	PE(aa-32:1)	1.61898	0.000255496	5.8759e+07	9.51294e+07	56865964	59731732	55073000	58577776	63546316	80812160	95063704	102738512	99607968	97424600	75164080	80139976	81116112	76641304	78419008	80714856	0.0406441		M-H	9.88231	689.498
Lipidomics	Phosphatidylethanolamine(acyl)	PE(aa-33:1)	1.40998	0.383006	1.61315e+06	2.27451e+06	2.10951e+06	130827	1.14879e+06	1.77657e+06	2.90006e+06	2.6896e+06	2.59495e+06	145190	3215217	2.7276e+06	2.9124e+06	2870229	2.87398e+06	3.54842e+06	2579181	2.62922e+06	0.111904		M-H	10.0144	703.513
Lipidomics	Phosphatidylethanolamine(acyl)	PE(aa-34:0)	0.289136	0.00127574	4.67098e+06	1.35055e+06	2.78632e+06	4.81718e+06	6.02763e+06	4777584	4.94618e+06	1.7599e+06	2.02417e+06	648764	1.67006e+06	649858	3.64463e+06	2.24835e+06	2.84717e+06	2.85756e+06	2.61848e+06	3.89169e+06	0.226317		M-H	10.298	719.545
Lipidomics	Phosphatidylethanolamine(acyl)	PE(aa-34:1)	1.10198	4.7289e-06	4.97233e+08	547943052	498412352	499275520	497857920	484890464	505730688	542501820	556524990	546382530	548591740	545714180	533718816	525738752	523618080	526296288	532884192	520441216	0.00940585		M-H	10.11	717.529
Lipidomics	Phosphatidylethanolamine(acyl)	PE(aa-34:2)	1.05065	0.0147574	1.7357e+08	1.82361e+08	170389968	174571136	175926704	171892304	175069536	177893984	179963200	191049728	180244384	182654816	176982976	175523328	176852160	179647696	185056784	175445904	0.0187929		M-H	9.93718	715.514
Lipidomics	Phosphatidylethanolamine(acyl)	PE(aa-34:3)	0.754499	0.000234146	6.64084e+06	5.01051e+06	6.54562e+06	6.93378e+06	6123467	6778894	6.82247e+06	4.46864e+06	4605575	5.31885e+06	5223010	5436480	5.5869e+06	5985947	7.20521e+06	5.64542e+06	5.94477e+06	6.32174e+06	0.0892662		M-H	9.78884	713.498
Lipidomics	Phosphatidylethanolamine(acyl)	PE(aa-35:1)	1.92238	0.0015898	945961	1.81849e+06	1.05548e+06	1.01906e+06	804872	970301	880094	1.63061e+06	2.27036e+06	1.79986e+06	1.49835e+06	1.89329e+06	1.55536e+06	1.45668e+06	1.13721e+06	1.6909e+06	1.41776e+06	1.15995e+06	0.174659		M-H	10.2706	731.546
Lipidomics	Phosphatidylethanolamine(acyl)	PE(aa-35:2)	2.12007	2.4345e-05	3.55764e+06	7.54243e+06	4.66655e+06	2.99942e+06	3.36119e+06	3.63613e+06	3.1249e+06	6885141	8077725	7377642	6809319	8562324	6.48907e+06	4649957	5904794	6464817	5.56362e+06	3.80239e+06	0.17897		M-H	10.0727	729.529
Lipidomics	Phosphatidylethanolamine(acyl)	PE(aa-36:1)	1.27942	3.11508e-06	583080524	746002406	593960060	597109060	576883520	570511230	576938750	760254660	747473790	712674620	743712510	765896450	674414080	682933120	688199940	676144260	684932030	662985280	0.0124105		M-H	10.344	745.56
Lipidomics	Phosphatidylethanolamine(acyl)	PE(aa-36:2)	1.23319	2.164e-05	4.40212e+08	5.42867e+08	444407040	443284768	436130336	434048768	443189600	538029500	560153090	554064640	535660384	526427872	478853088	491517376	483286944	490919904	497614208	498592096	0.0213016		M-H	10.1863	743.545
Lipidomics	Phosphatidylethanolamine(acyl)	PE(aa-36:3)	1.0307	0.309777	1.73442e+08	1.78766e+08	175539424	183926176	161159104	171445136	175138784	166674000	178067088	183295744	180944448	184849248	175336672	171294992	185890080	180752528	184005184	186090752	0.0371697		M-H	10.0336	741.529
Lipidomics	Phosphatidylethanolamine(acyl)	PE(aa-36:4)	1.05775	0.00636653	992317698	1049627790	960112640	986712320	980039300	1008582660	1026141570	1038341890	1024223620	1053656130	1044466430	1087450880	1016164990	1032162820	1034661380	1016733500	1029146690	1040763780	0.00891465		M-H	9.93074	739.513
Lipidomics	Phosphatidylethanolamine(acyl)	PE(aa-36:5)	0.908228	0.181635	73887744	67106888	67707376	71555984	71606576	80957216	77611568	52977560	66846056	67325544	73888800	74496480	66574968	68690336	72613576	68324744	71847880	71825688	0.0431486		M-H	9.80203	737.498
Lipidomics	Phosphatidylethanolamine(acyl)	PE(aa-36:6)	0.697431	0.0789573	5.86303e+06	4089058	5346940	5.50702e+06	8070739	5.59853e+06	4791907	3.7504e+06	3.05497e+06	3.63621e+06	6.71721e+06	3286505	3.62299e+06	3.46986e+06	3.6573e+06	3.72906e+06	3.74441e+06	3741752	0.058859		M-H	9.68128	735.482
Lipidomics	Phosphatidylethanolamine(acyl)	PE(aa-37:1)	1.4697	0.0128088	2.97868e+06	4.37777e+06	3.37085e+06	3.64728e+06	1.95846e+06	2.80622e+06	3.11059e+06	3.96594e+06	4619515	4.02391e+06	3.73405e+06	5545437	3.63434e+06	3.59967e+06	3.96371e+06	4245076	3.73894e+06	4.13654e+06	0.0824724		M-H	10.427	759.576
Lipidomics	Phosphatidylethanolamine(acyl)	PE(aa-37:4)	0.959186	0.452121	19988878	1.91731e+07	19670740	20383292	22155242	18030606	19704510	20254166	18811192	21555310	18170644	17073950	17342848	20312134	20138442	18420084	20136624	20519744	0.0643541		M-H	10.0832	753.528
Lipidomics	Phosphatidylethanolamine(acyl)	PE(aa-37:5)	1.67167	0.00598842	2.696e+06	4.50683e+06	2.53176e+06	2744265	2.28807e+06	3377313	2.5386e+06	4.41519e+06	4929292	3199272	4450866	5539520	4036207	4.04515e+06	4.23992e+06	3.26517e+06	3.47e+06	4.52294e+06	0.112169		M-H	9.91038	751.513
Lipidomics	Phosphatidylethanolamine(acyl)	PE(aa-37:6)	1.03481	0.759948	8.16464e+06	8.44887e+06	11173457	8711279	7291596	6.69462e+06	6.95223e+06	7433405	8430451	9007655	9083175	8.28965e+06	9222524	9014355	10330278	9797670	9760874	11108008	0.0829464		M-H	9.8176	749.498
Lipidomics	Phosphatidylethanolamine(acyl)	PE(aa-38:1)	0.653714	9.79559e-05	1.23822e+08	8.0944e+07	122518216	128602624	118901896	122790656	126295456	83860632	79514336	69498632	78496576	93349680	101284696	98866968	100268472	99069344	98094280	100868224	0.0216721		M-H	10.5223	773.592
Lipidomics	Phosphatidylethanolamine(acyl)	PE(aa-38:2)	0.948088	0.139095	9.96609e+07	9.44873e+07	104144728	104126360	92762000	100603104	96668200	93917376	99794520	88246216	91218248	99260208	93304976	95991992	96904600	99542144	101555928	102125448	0.041103		M-H	10.381	771.576
Lipidomics	Phosphatidylethanolamine(acyl)	PE(aa-38:3)	0.871923	0.00159112	6.47267e+07	5.64367e+07	61076356	64793864	66282920	64301940	67178496	54194400	59755504	52410920	58496512	57326168	57314336	58434944	62847620	62058116	61120768	60208712	0.0355801		M-H	10.2945	769.56
Lipidomics	Phosphatidylethanolamine(acyl)	PE(aa-38:4)	0.924854	0.00076761	2589609064	2395010866	2502318080	2557682690	2645952260	2585584130	2656508160	2445246460	2363010820	2421973500	2335353090	2409470460	2476541950	2459860220	2433766910	2505899260	2487785220	2455044610	0.00959345		M-H	10.1864	767.544
Lipidomics	Phosphatidylethanolamine(acyl)	PE(aa-38:5)	1.15918	0.00902457	1485719886	1722215502	1500910340	1522612860	1396724100	1493214720	1515137410	1697376510	1720520580	1575335940	1702994300	1914850180	1566858880	1628311810	1700818050	1649028610	1678392830	1737456900	0.0394156		M-H	10.0372	765.528
Lipidomics	Phosphatidylethanolamine(acyl)	PE(aa-38:6)	0.953183	0.00710487	5256677380	5010575140	5244357100	5290803200	5194515500	5179378700	5374332400	4984933400	5030841300	4830623200	5036613600	5169864200	5203356700	5123991600	5140783600	5078723100	5151401000	5112081900	0.00762155		M-H	9.9156	763.514
Lipidomics	Phosphatidylethanolamine(acyl)	PE(aa-38:7)	1.00202	0.962483	6.73831e+07	6.75193e+07	64918328	64045520	68699840	72209680	67042084	60983320	67437520	67401520	66000204	75773960	58441668	64226948	67484560	63761000	65274544	66057904	0.0493117		M-H	9.76487	761.498
Lipidomics	Phosphatidylethanolamine(acyl)	PE(aa-39:1)	1.63478	0.000287008	1630881	2.66613e+06	1.71962e+06	1.58079e+06	1.73692e+06	1328016	1.78907e+06	2848163	2.6101e+06	2185666	2.84431e+06	2.84243e+06	2.13514e+06	2203141	2.52601e+06	1.99848e+06	2.32439e+06	2262768	0.157646		M-H	10.6085	787.61
Lipidomics	Phosphatidylethanolamine(acyl)	PE(aa-39:4)	1.43069	0.000262124	4.95551e+06	7.0898e+06	4454801	5012387	5352639	5582613	4375098	7.61178e+06	7136705	6164426	7132258	7403806	6453523	7.01112e+06	6125677	6.14644e+06	6.4192e+06	6220016	0.0473058		M-H	10.2862	781.559
Lipidomics	Phosphatidylethanolamine(acyl)	PE(aa-39:6)	0.825266	0.000617346	9.10593e+07	7.51481e+07	96616280	93642416	88338944	85575096	91123560	73946400	75120832	76632960	76568136	73472368	85233608	86389608	84446480	84698024	86656832	85412856	0.0144194		M-H	10.0475	777.529
Lipidomics	Phosphatidylethanolamine(acyl)	PE(aa-39:7)	1.09439	0.159802	8.36598e+06	9.15562e+06	8765527	8757317	7.37385e+06	7.527e+06	9406204	9727172	9156088	7939675	9644848	9310324	8629734	10145368	9163148	8899330	9609060	9881354	0.061683		M-H	9.87063	775.512
Lipidomics	Phosphatidylethanolamine(acyl)	PE(aa-40:1)	0.706454	0.00205159	2.91212e+07	2.05728e+07	30230112	30023624	27604350	28097952	29650164	24491470	19449790	16650139	19387992	22884742	26281608	25561448	25950644	23821220	23847972	24701974	0.046399		M-H	10.696	801.623
Lipidomics	Phosphatidylethanolamine(acyl)	PE(aa-40:2)	0.801272	0.0120701	41936460	3.36025e+07	43678352	44963780	37304740	40610324	43125104	36685224	34307824	27642612	30370442	39006456	36839500	35544012	39625140	36275792	37798888	37407124	0.0362546		M-H	10.5501	799.608
Lipidomics	Phosphatidylethanolamine(acyl)	PE(aa-40:3)	1.04646	0.139788	7.48803e+06	7.8359e+06	7160894	6985897	7790366	7761861	7741145	7677132	7955130	7671640	7.62105e+06	8254539	6447276	7314294	8332096	7929981	7736928	7567408	0.0777498		M-H	10.4907	797.592
Lipidomics	Phosphatidylethanolamine(acyl)	PE(aa-40:4)	0.899483	0.0178668	917768014	825516696	900021890	937729280	903100420	936337020	911651460	814882240	791024830	804108990	793806140	923761280	843244990	854322240	880878980	877689540	895031100	881246080	0.0242135		M-H	10.3666	795.575
Lipidomics	Phosphatidylethanolamine(acyl)	PE(aa-40:5)	0.664814	2.84764e-05	3.40256e+07	2.26207e+07	33125468	33075282	32800840	35310504	35815708	20637416	24114568	20452646	22402232	25496564	28939560	29298756	28215932	28841798	28613984	28193612	0.0138165		M-H	10.3066	793.56
Lipidomics	Phosphatidylethanolamine(acyl)	PE(aa-40:6)	0.911238	4.73209e-05	4658646720	4245133770	4710667800	4678555100	4716746200	4505442300	4681822200	4323395600	4159480320	4322668000	4208640510	4211484420	4412573700	4402703900	4298269200	4398165500	4439233500	4319231500	0.0120067		M-H	10.1666	791.544
Lipidomics	Phosphatidylethanolamine(acyl)	PE(aa-40:7)	0.905794	0.000110918	1893822334	1715412224	1934893180	1920672510	1869666050	1850379390	1893500540	1746553600	1746621570	1694241150	1740126980	1649517820	1773648260	1824437760	1888892540	1800850940	1856533250	1850196220	0.0233601		M-H	10.0066	789.527
Lipidomics	Phosphatidylethanolamine(acyl)	PE(aa-40:8)	0.802817	0.00503986	2.69706e+08	2.16525e+08	292427104	285998016	231777632	260705968	277621856	219851040	218372272	189201008	238693920	216505696	241369280	254915840	265778368	247519216	254714512	270629440	0.0459785		M-H	9.83123	787.513
Lipidomics	Phosphatidylethanolamine(acyl)	PE(aa-40:9)	0.282533	3.07576e-06	4.53441e+06	1.28112e+06	4410443	5.05869e+06	4.55437e+06	4.78121e+06	3867364	1.31349e+06	703363	978555	1576057	1.83415e+06	2.11466e+06	2361034	2.01739e+06	1.87707e+06	2.72078e+06	2394112	0.127656		M-H	9.70207	785.498
Lipidomics	Phosphatidylethanolamine(acyl)	PE(aa-42:1)	0.53706	0.000112271	14857259	7.97924e+06	15014202	15310767	14730454	15055584	14175288	9226267	7927754	6.03343e+06	7612926	9095804	12918425	12603903	12141124	10992693	10962593	10666607	0.0850744		M-H	10.8512	829.653
Lipidomics	Phosphatidylethanolamine(acyl)	PE(aa-42:2)	0.876521	0.067375	1.6376e+07	1.43539e+07	17294190	16165092	15973397	15881198	16566320	15790102	13988135	11912614	13571876	16506960	16348623	16394442	15783796	16064006	13590637	15338922	0.0714611		M-H	10.7204	827.639
Lipidomics	Phosphatidylethanolamine(acyl)	PE(aa-42:3)	0.716656	0.0620444	1.57127e+06	1.12606e+06	1.65836e+06	1.79113e+06	1267693	1.57417e+06	1565016	584576	1.3844e+06	1.03771e+06	1.0256e+06	1.59802e+06	1.22468e+06	1.15269e+06	1.21684e+06	1.35718e+06	1.43441e+06	974919	0.122988		M-H	10.6307	825.624
Lipidomics	Phosphatidylethanolamine(acyl)	PE(aa-42:4)	0.591849	1.83706e-05	4.1994e+07	2.48541e+07	40947140	40779552	41589104	43957496	42696796	24485340	22944328	23213714	24053022	29574150	30613196	30637386	31875992	34556928	31798782	33702212	0.0538045		M-H	10.5328	823.607
Lipidomics	Phosphatidylethanolamine(acyl)	PE(aa-42:5)	0.787386	0.0125587	2.06365e+07	1.62489e+07	21985912	20706600	19169524	20214808	21105502	14993866	15234792	16104873	14402792	20508016	16670102	16269116	18280534	18607414	18312982	19721594	0.0666078		M-H	10.4127	821.592
Lipidomics	Phosphatidylethanolamine(acyl)	PE(aa-42:6)	0.78507	0.000251961	1.98282e+07	1.55666e+07	18116734	20349284	19318380	20812440	20544328	15000567	15365736	16206232	14287104	16973134	17729364	18590358	19109776	19176618	18160204	18314650	0.0289393		M-H	10.3669	819.575
Lipidomics	Phosphatidylethanolamine(acyl)	PE(aa-42:8)	0.810999	0.0120922	7.44126e+07	60348508	74464512	77473312	67204208	74892704	78028192	60680640	61119288	48665304	60411284	70866024	65233160	68517864	71439712	68693440	71647448	74187504	0.0424232		M-H	10.0523	815.544
Lipidomics	Phosphatidylethanolamine(acyl)	PE(aa-42:9)	0.867392	0.0962234	63079868	54714972	61217272	66714024	58270760	63307140	65890144	52975856	56243848	41397712	58300336	64657108	57372548	57724516	62048944	59669180	60056412	64443584	0.0460384		M-H	9.91656	813.528
Lipidomics	Phosphatidylethanolamine(acyl)	PE(aa-42:10)	0.990956	0.894547	2.88191e+08	285584448	292020032	286739584	258402608	299712704	304079584	273211360	286850592	231539648	301018880	335301760	283125952	297822816	308056544	293695968	302134592	311620384	0.0385088		M-H	9.82892	811.513
Lipidomics	Phosphatidylethanolamine(acyl)	PE(aa-44:4)	0.743825	0.017685	4.72595e+06	3.51528e+06	4912673	4.46329e+06	4.76819e+06	4609104	4.87649e+06	3677283	3.25098e+06	2.73771e+06	3252280	4658160	4.231e+06	4772969	4404543	3764443	4269859	3.74716e+06	0.0855711		M-H	10.7431	851.64
Lipidomics	Phosphatidylethanolamine(acyl)	PE(aa-44:5)	1.41517	0.00923509	2.64561e+06	3.74399e+06	2.67657e+06	2.86866e+06	2.40618e+06	2.6848e+06	2.59186e+06	4.14245e+06	3169005	3.34541e+06	3.57594e+06	4487129	3007123	3.28955e+06	2.54386e+06	3262313	3479020	3.60898e+06	0.113997		M-H	10.5847	849.625
Lipidomics	Phosphatidylethanolamine(acyl)	PE(aa-44:9)	0.91091	0.687738	1.0891e+06	992068	1.24928e+06	1.31005e+06	1.15439e+06	368061	1.3637e+06	629365	1.29931e+06	840491	836587	1.35458e+06	972423	959189	1.31366e+06	1.08384e+06	929001	1.05656e+06	0.149748		M-H	10.1519	841.56
Lipidomics	Phosphatidylethanolamine(acyl)	PE(aa-44:10)	0.93841	0.462542	473025152	4.43892e+08	476654112	492478240	449088896	477399072	469505440	433077568	435596512	340188064	447500800	563095490	444306336	469211808	489160544	456805312	482409440	482386624	0.0372048		M-H	10.0174	839.544
Lipidomics	Phosphatidylethanolamine(acyl)	PE(aa-44:11)	0.952883	0.572034	9.77984e+07	9.31904e+07	96099568	101900536	89444264	99559320	101988480	82778824	97561968	72071480	99521376	114018480	92787032	99697720	100166280	95922456	96853288	104690496	0.0422973		M-H	9.87389	837.528
Lipidomics	Phosphatidylethanolamine(acyl)	PE(aa-44:12)	0.923298	0.256821	3.24398e+08	2.99516e+08	326633696	326716096	306155808	325616672	336866944	283835520	303010432	240659072	317158848	352915584	305346912	314824704	324826816	312988544	322429440	321428352	0.0268324		M-H	9.81659	835.513
Lipidomics	Phosphatidylethanolamine(alk)	PE(ae-32:1)	0.516909	0.000236538	7.7466e+06	4.00429e+06	6973872	8.23135e+06	9199803	7511881	6816078	4627664	4.3623e+06	3.45943e+06	4218161	3.35387e+06	6379259	6.42415e+06	5823619	5.59675e+06	5.46961e+06	4964545	0.0899873		M-H	10.2054	675.518
Lipidomics	Phosphatidylethanolamine(alk)	PE(ae-34:1)	0.404775	2.14902e-07	1.96705e+07	7.96214e+06	18694634	21395364	20359724	18921470	18981432	8285411	9277177	6190047	8.10543e+06	7.95263e+06	13259309	13701987	12583468	12606148	13734819	12851442	0.0674883		M-H	10.4191	703.55
Lipidomics	Phosphatidylethanolamine(alk)	PE(ae-34:2)	0.807252	0.000367845	917621864	740752384	922849220	930803970	922951940	911516670	899987520	780829820	762980480	746129730	741816770	672005120	817022590	813894400	823472960	846868740	837466750	834853760	0.0214926		M-H	10.2481	701.533
Lipidomics	Phosphatidylethanolamine(alk)	PE(ae-34:3)	2.02963	1.97619e-05	1.02594e+08	2.08228e+08	105247032	102391936	103823520	99192216	102316112	199109952	221980336	213931104	212244976	193872736	153914464	152481120	157297440	155739680	157503040	158220720	0.0138423		M-H	10.0835	699.519
Lipidomics	Phosphatidylethanolamine(alk)	PE(ae-35:2)	1.12099	0.0274553	4.42216e+07	4.95718e+07	43687552	45287664	46474020	43505464	42153132	52908292	51392984	51830504	47733980	43993004	47482864	47492204	48283056	48777768	50113956	49968840	0.0217903		M-H	10.346	715.55
Lipidomics	Phosphatidylethanolamine(alk)	PE(ae-35:3)	2.98314	0.000235631	3.53684e+06	1.05509e+07	3976555	3953314	3.91105e+06	2965582	2.87769e+06	12414980	11277157	11222634	9243413	8596294	7.22852e+06	7361478	8.09874e+06	6.68099e+06	8221911	7219316	0.0772058		M-H	10.188	713.533
Lipidomics	Phosphatidylethanolamine(alk)	PE(ae-36:1)	0.257088	5.90091e-05	2129322	547424	1.79426e+06	2.23572e+06	2.31338e+06	2.52524e+06	1.77801e+06	684994	660775	260391	700281	430680	1.43094e+06	1282297	1.25165e+06	1.46523e+06	1509129	1.42351e+06	0.0821288		M-H	10.6196	731.582
Lipidomics	Phosphatidylethanolamine(alk)	PE(ae-36:2)	0.726754	1.25349e-05	1460835506	1061667404	1484359810	1484361980	1473554820	1443415420	1418485500	1111113980	1079166080	1113341310	1029602110	975113540	1215914880	1196325890	1236853760	1236753540	1268368000	1245691140	0.0183746		M-H	10.4371	729.565
Lipidomics	Phosphatidylethanolamine(alk)	PE(ae-36:3)	1.95793	1.16117e-05	1018294350	1993747686	1077993860	1012395650	1027342980	978992640	994746620	2112120830	2029653120	2028798720	1993166080	1804999680	1523784320	1543471620	1536387460	1559830910	1580380930	1529120000	0.0177264		M-H	10.2842	727.55
Lipidomics	Phosphatidylethanolamine(alk)	PE(ae-36:4)	0.880478	0.010192	97143184	8.55325e+07	100276144	96524400	95925088	97699328	95290960	84325200	83688224	93680176	88551448	77417216	89730056	93161608	90575560	90570240	95902416	96145648	0.0309913		M-H	10.1587	725.533
Lipidomics	Phosphatidylethanolamine(alk)	PE(ae-36:5)	0.783255	6.08796e-06	1248545178	977929588	1208629250	1222009860	1308439040	1279160830	1224486910	973349820	972492740	1023125060	990246850	930433470	1113311620	1100245250	1109139460	1109380860	1124980990	1116122750	0.00721622		M-H	10.086	723.518
Lipidomics	Phosphatidylethanolamine(alk)	PE(ae-36:6)	0.865648	0.00229255	31899810	2.7614e+07	30763940	32159304	30905756	33183974	32486076	24888794	27148032	28554920	29263306	28215014	29766912	29579672	28632288	29285584	30902610	29923304	0.038848		M-H	9.94831	721.503
Lipidomics	Phosphatidylethanolamine(alk)	PE(ae-36:7)	1.75953	0.00090099	3.02823e+06	5.32827e+06	2.44672e+06	3.43426e+06	3.38704e+06	3.56442e+06	2.3087e+06	4430538	6113383	4633956	5987401	5.47607e+06	4566206	4246751	4341447	4537092	4345775	4745054	0.0393011		M-H	9.82132	719.488
Lipidomics	Phosphatidylethanolamine(alk)	PE(ae-37:2)	1.19624	0.00468886	4.39274e+07	5.25475e+07	45370976	47375660	41831720	41461036	43597576	58354740	52062836	50102888	48121428	54095672	49933180	47895324	49819320	50073932	50962272	49850364	0.0240512		M-H	10.5396	743.582
Lipidomics	Phosphatidylethanolamine(alk)	PE(ae-37:3)	2.8081	5.27935e-07	1.73382e+07	4.86873e+07	18312614	18283678	16860458	16452409	16781688	51057788	47092756	50339184	45730376	49216432	31543156	34861400	36171644	35207580	33964636	35431896	0.0495508		M-H	10.3842	741.566
Lipidomics	Phosphatidylethanolamine(alk)	PE(ae-37:5)	0.981286	0.531325	1.68368e+07	1.65217e+07	17337112	16047063	17269068	16478062	17052748	16133214	15525092	17174678	16028081	17747582	15746565	17069366	16919478	18083140	16358446	18165700	0.0531317		M-H	10.2184	737.535
Lipidomics	Phosphatidylethanolamine(alk)	PE(ae-37:7)	0.982874	0.84738	2.12143e+06	2.0851e+06	2.31037e+06	1.95279e+06	2.04464e+06	1.85978e+06	2.43957e+06	1.80617e+06	1.9332e+06	2.04639e+06	2645719	1.994e+06	1.74305e+06	2339039	1810581	2.17733e+06	1460548	2.21878e+06	0.16304		M-H	9.93339	733.503
Lipidomics	Phosphatidylethanolamine(alk)	PE(ae-38:2)	1.00121	0.968994	1128707276	1130073752	1160375040	1145422080	1116840450	1102024700	1118874110	1245133180	1117277310	1050234240	1113329020	1124395010	1164878080	1138795900	1127748100	1113042820	1122060540	1109401470	0.0214259		M-H	10.6173	757.597
Lipidomics	Phosphatidylethanolamine(alk)	PE(ae-38:3)	1.83795	9.21736e-07	660294940	1213588530	685503040	674365890	664263620	624675140	652667010	1250253310	1229691780	1264306430	1176132860	1147558270	942734210	948234050	989645890	1005897920	1008988860	1004239420	0.0279384		M-H	10.4688	755.581
Lipidomics	Phosphatidylethanolamine(alk)	PE(ae-38:4)	0.81346	3.75078e-06	2.26116e+08	1.83936e+08	229903904	230057280	218060704	227175712	225383744	182725248	184813792	183828064	181065888	187249472	196719840	198583424	211828704	206365104	217929456	214453312	0.0459313		M-H	10.3787	753.564
Lipidomics	Phosphatidylethanolamine(alk)	PE(ae-38:5)	0.789787	6.11221e-07	1452613350	1147254964	1434554240	1449870590	1472999040	1457149060	1448493820	1122325120	1151699970	1166650880	1116125700	1179473150	1291031300	1290253310	1332857730	1331664770	1310854780	1310448380	0.0130692		M-H	10.3208	751.55
Lipidomics	Phosphatidylethanolamine(alk)	PE(ae-38:6)	1.41608	0.000399028	4.55222e+08	644630258	471187616	465596736	438566720	451668608	449092128	644614590	663113410	568515070	659935420	686972800	535992960	548622140	575244220	575734910	582033410	586182980	0.0437832		M-H	10.1485	749.534
Lipidomics	Phosphatidylethanolamine(alk)	PE(ae-38:7)	0.879608	1.32148e-06	5053344780	4444961880	5065834500	5069860900	5086976000	4951449600	5092602900	4334049800	4409499100	4541252100	4471514100	4468494300	4753594400	4747488800	4778609700	4791349200	4794604500	4796955600	0.00415664		M-H	10.0607	747.519
Lipidomics	Phosphatidylethanolamine(alk)	PE(ae-38:8)	1.08465	0.0270848	31783002	34473284	32452244	32735226	29377880	31347996	33001664	32737632	33364744	34392820	34835192	37036032	31959548	33996516	36270124	33363172	34912228	34756592	0.0427499		M-H	9.90917	745.504
Lipidomics	Phosphatidylethanolamine(alk)	PE(ae-39:2)	1.5452	0.00147201	2.15459e+07	3.32928e+07	21653600	22211132	21712914	20918702	21233318	37497124	33200416	28210182	32266562	35289660	28671892	28043388	28248480	25439172	27118796	27101812	0.0407682		M-H	10.7024	771.613
Lipidomics	Phosphatidylethanolamine(alk)	PE(ae-39:3)	3.08956	1.94304e-05	18369962	5.6755e+07	18692328	18948658	17517846	17872566	18818412	59869884	57752880	51499188	53817864	60835368	37769600	37025092	39609248	40212108	38987840	39807112	0.0299896		M-H	10.5601	769.596
Lipidomics	Phosphatidylethanolamine(alk)	PE(ae-39:5)	1.07519	0.0402298	3.09971e+07	33327632	31461308	31541630	30455878	31483600	30043036	33615904	32254928	34310080	30933604	35523644	30651716	29908836	31906196	31730966	32589668	32716048	0.0341806		M-H	10.389	765.565
Lipidomics	Phosphatidylethanolamine(alk)	PE(ae-39:6)	2.36692	0.000283925	1.98435e+06	4.69679e+06	2.05903e+06	1.7628e+06	2817164	2.4452e+06	837554	4356790	5087672	4.09332e+06	4.42624e+06	5.51993e+06	4.12615e+06	3.81634e+06	2.77638e+06	3.41542e+06	3141904	3587790	0.128255		M-H	10.2477	763.551
Lipidomics	Phosphatidylethanolamine(alk)	PE(ae-39:7)	0.862299	0.0059972	61647260	5.31584e+07	64293904	63023256	62125460	57291040	61502640	52073640	55259428	58618984	52114816	47725076	58279232	58088300	56628724	56960644	54661376	52341048	0.0374771		M-H	10.1606	761.535
Lipidomics	Phosphatidylethanolamine(alk)	PE(ae-40:2)	0.583606	1.85629e-05	170099584	9.92711e+07	168277184	175473616	174380880	165055968	167310272	110812840	95155000	84438576	98265880	107683136	149370240	140009136	141259744	135703856	131763768	134168752	0.0455307		M-H	10.7773	785.627
Lipidomics	Phosphatidylethanolamine(alk)	PE(ae-40:3)	1.27828	0.00055348	3.14078e+08	4.0148e+08	336497984	310380672	306071968	303255040	314184864	424938176	403703712	370949632	379466496	428343808	359155584	355969472	359317792	361380800	357657760	347531200	0.0125511		M-H	10.6442	783.611
Lipidomics	Phosphatidylethanolamine(alk)	PE(ae-40:4)	0.861258	0.00100275	1.09165e+08	9.40188e+07	107492928	114432152	104988128	109410768	109498576	93319168	93136272	92736800	88339336	102562528	95839096	99347032	103897384	103915792	103034992	101606000	0.0287415		M-H	10.5187	781.595
Lipidomics	Phosphatidylethanolamine(alk)	PE(ae-40:5)	0.703535	7.70658e-05	1277794152	898972506	1249457280	1284677250	1265240580	1300051330	1289544320	860857540	859004540	924957180	849043460	1000999810	1005936640	1001829760	1067243970	1084467330	1096212740	1065869570	0.0355639		M-H	10.4622	779.581
Lipidomics	Phosphatidylethanolamine(alk)	PE(ae-40:6)	1.22762	0.0013947	4.23238e+08	5.19576e+08	431078656	428379520	417871616	416177280	422683712	525428608	513067264	486094912	507849152	565441280	452958112	469253888	477007296	482408384	489943808	478511232	0.0278169		M-H	10.3551	777.565
Lipidomics	Phosphatidylethanolamine(alk)	PE(ae-40:7)	0.828957	3.64558e-06	3534158798	2929665178	3618955010	3502852610	3516466690	3423378940	3609140740	2927894270	2854500350	2961183490	2923570690	2981177090	3205762300	3197608700	3176040450	3241431040	3274377220	3179160320	0.0112526		M-H	10.2891	775.55
Lipidomics	Phosphatidylethanolamine(alk)	PE(ae-40:8)	1.17071	0.000634311	1777227572	2080624232	1822698880	1781474820	1758499200	1710349820	1813115140	2164240900	2141813380	1956700160	2130843010	2009523710	1940352380	1915752700	1951609980	1946905090	1977014140	1936257540	0.00944967		M-H	10.0999	773.534
Lipidomics	Phosphatidylethanolamine(alk)	PE(ae-40:9)	0.790296	0.00853486	6.17503e+07	48801044	61582568	62681224	62014328	60785824	61687792	53478092	46577616	39077464	52525472	52346576	54153948	56241024	56818776	56103708	55091848	55932592	0.0179489		M-H	9.95406	771.519
Lipidomics	Phosphatidylethanolamine(alk)	PE(ae-42:7)	0.641716	3.42229e-06	1.4671e+08	94146304	143016096	148835264	144858992	147976016	148864640	90725128	92205712	96019352	88428992	103352336	107697248	112166256	113912024	113818688	120601456	116041760	0.0361742		M-H	10.467	803.581
Lipidomics	Phosphatidylethanolamine(alk)	PE(ae-42:8)	1.27354	6.73507e-05	1.89253e+07	2.41021e+07	19067810	19698624	19653812	18474864	17731292	23916658	25047954	25509048	22798868	23237924	21551814	21160938	20624964	21611188	22114168	22517262	0.0294924		M-H	10.3229	801.565
Lipidomics	Phosphatidylglycerol(acyl)	PG(aa-32:1)	1.58623	0.0319414	2.69893e+06	4.28112e+06	1.93835e+06	3.04196e+06	2.90943e+06	2748137	2.85677e+06	3.67851e+06	5.07946e+06	5790418	2.98333e+06	3873887	2.92019e+06	3700367	3.54206e+06	3.43859e+06	3029619	3.73623e+06	0.0935375		M-H	9.16338	720.491
Lipidomics	Phosphatidylglycerol(acyl)	PG(aa-32:2)	1.4357	0.0754048	537133	771162	479262	395967	879969	377945	552523	873754	635715	814398	595018	936927	608515	651086	851864	570242	448518	869671	0.225039		M-H	9.01263	718.476
Lipidomics	Phosphatidylglycerol(acyl)	PG(aa-34:0)	0.307027	3.42976e-13	4.92636e+08	1.51252e+08	498690112	496368512	495102464	482857248	490159968	158307696	143930912	149645424	155047168	149330272	276201760	276673024	259516992	277270816	288030912	265890224	0.0332279		M-H	9.53242	750.539
Lipidomics	Phosphatidylglycerol(acyl)	PG(aa-34:1)	1.08236	0.103818	5.32145e+08	575973234	535656512	531449024	511078848	603440450	479101728	589004420	592961980	589884030	567509310	540506430	476933888	552453500	493639136	521412352	520688032	544818880	0.0510631		M-H	9.18642	748.523
Lipidomics	Phosphatidylglycerol(acyl)	PG(aa-34:2)	2.18885	0.199435	58287.8	127583	69653.1	44270	46864.9	45308.5	85342.4	70698.3	198936	268168	61436.2	38678.9	69129.9	47841.1	64750.7	52634.4	85950.8	55058.7	0.229818		M-H	9.22205	746.507
Lipidomics	Phosphatidylglycerol(acyl)	PG(aa-34:2)	1.27378	0.00776027	3.40995e+07	4.34351e+07	38061772	33601448	32342202	33041286	33450738	42689616	40600484	51303720	43395892	39186036	33947172	35007576	36810284	38439672	38857432	37919292	0.0647532		M-H	9.12732	746.507
Lipidomics	Phosphatidylglycerol(acyl)	PG(aa-34:3)	0.995706	0.965067	3.59005e+06	3.57464e+06	3.95349e+06	3784642	3.02786e+06	3.1053e+06	4.07897e+06	3.51616e+06	3.8918e+06	4391229	3.12237e+06	2.95162e+06	3276537	3.49975e+06	3.76206e+06	3486175	3.70609e+06	3492127	0.0728951		M-H	9.01783	744.492
Lipidomics	Phosphatidylglycerol(acyl)	PG(aa-34:3)	1.70974	0.0609774	3.4526e+06	5.90304e+06	3516296	4.33711e+06	3.26558e+06	2.92907e+06	3214948	7763786	6149678	2.66452e+06	7820436	5116767	4367948	4.14601e+06	4.40484e+06	4303214	4485275	4435790	0.0262005		M-H	8.90369	744.492
Lipidomics	Phosphatidylglycerol(acyl)	PG(aa-34:4)	3.65983	0.00258939	377307	1.38088e+06	476349	458240	174907	224512	552525	1.86107e+06	1.48111e+06	772758	1.43282e+06	1.35664e+06	705545	1075685	1.06476e+06	951249	697695	1.02686e+06	0.175808		M-H	8.84778	742.476
Lipidomics	Phosphatidylglycerol(acyl)	PG(aa-35:1)	0.265106	2.14845e-05	8.39094e+06	2.22449e+06	7.57121e+06	8928208	9724376	7.63019e+06	8.10073e+06	2.36878e+06	2.62735e+06	2470362	1.9707e+06	1.68523e+06	4756388	4.0793e+06	3.99931e+06	4208021	4591587	3.95706e+06	0.0742706		M-H	9.43963	762.538
Lipidomics	Phosphatidylglycerol(acyl)	PG(aa-36:1)	0.60123	1.62324e-05	1275373902	766792794	1246950400	1212374020	1429111550	1273941250	1214492290	816949250	731042300	724560960	842369220	719042240	957660290	991413820	946655170	965070340	1019978300	998675710	0.027402		M-H	9.55142	776.555
Lipidomics	Phosphatidylglycerol(acyl)	PG(aa-36:2)	1.22267	0.358055	1.59216e+07	1.94668e+07	14884236	14916733	16294130	17643214	15869643	15835207	17584448	32447576	18711960	12755038	16286769	18735296	19429894	20699260	16943936	19920876	0.0893402		M-H	9.29834	774.539
Lipidomics	Phosphatidylglycerol(acyl)	PG(aa-36:3)	1.76522	0.07672	6.34412e+07	1.11987e+08	71625936	77482104	57112984	37275784	73708944	168557328	109269016	42153220	130913816	109043712	106594888	78270088	92383160	83788240	90859640	79910736	0.110829		M-H	9.05341	772.523
Lipidomics	Phosphatidylglycerol(acyl)	PG(aa-36:3)	1.02488	0.671969	2.41161e+07	2.4716e+07	24523180	23075354	26082808	22556626	24342568	21360202	23167422	28516640	25139456	25396432	20106800	20745930	25586432	23544984	25534346	25240564	0.10655		M-H	9.16057	772.523
Lipidomics	Phosphatidylglycerol(acyl)	PG(aa-36:4)	0.985545	0.527548	3.89663e+08	3.84031e+08	392436672	399539200	400079936	376071296	380188192	373735648	386205856	365627008	388579328	406005376	369922240	373303904	390725120	390092640	393772640	399781024	0.0332532		M-H	9.10879	770.508
Lipidomics	Phosphatidylglycerol(acyl)	PG(aa-36:4)	2.30351	0.00142674	2.72175e+07	6.26959e+07	31459104	27296876	27592368	23520060	26219224	65223912	68801664	43652080	63897508	71904584	42369408	44389732	45176032	44807172	43606600	45099424	0.0297266		M-H	9.01829	770.508
Lipidomics	Phosphatidylglycerol(acyl)	PG(aa-36:5)	0.984749	0.81206	3.82286e+07	3.76455e+07	38233364	38685884	38686784	33890712	41646148	33377576	41273308	32255944	39766256	41554644	33236172	36021420	39291136	40763200	39698344	42479380	0.0850982		M-H	9.01481	768.493
Lipidomics	Phosphatidylglycerol(acyl)	PG(aa-36:5)	3.0797	0.0074899	4.51715e+06	1.39114e+07	4.0136e+06	5016079	4446439	4354096	4755545	17248990	14059768	6613501	15693932	15941050	9332271	8709561	8534194	8671908	8421510	8164602	0.0433628		M-H	8.8867	768.493
Lipidomics	Phosphatidylglycerol(acyl)	PG(aa-38:2)	1.86459	0.00277898	5.98692e+07	1.11631e+08	61695032	59177008	71086032	55651748	51736248	140646528	114173456	94037808	117798696	91499848	92221072	79208336	75821088	81593600	77164048	84213880	0.0677597		M-H	9.52203	802.57
Lipidomics	Phosphatidylglycerol(acyl)	PG(aa-38:4)	0.395697	1.90693e-05	1891842562	748597054	1874510980	1869424000	2127604480	1874940290	1712733060	746471620	739266300	832418940	723869630	700958780	1009595200	1039366400	1036503490	1137242880	1141571330	1116294270	0.0521138		M-H	9.43039	798.539
Lipidomics	Phosphatidylglycerol(acyl)	PG(aa-38:5)	0.25427	0.000152823	1.82118e+07	4.63073e+06	17204254	17674732	23440240	15030695	17709290	6629983	4539985	2912691	5555942	3.51503e+06	15721452	12899726	10273896	11339698	10169678	9719342	0.196079		M-H	9.28445	796.526
Lipidomics	Phosphatidylglycerol(acyl)	PG(aa-38:5)	1.12415	0.186708	3.99056e+07	4.48599e+07	38007320	40852684	39550292	42840416	38277252	40433800	49760956	54551592	39561340	39991984	35251864	36086248	35444588	38125360	35738880	41441768	0.0603386		M-H	9.14382	796.523
Lipidomics	Phosphatidylglycerol(acyl)	PG(aa-38:6)	1.69833	3.13791e-06	5.74923e+07	9.76409e+07	62678952	58376916	52752164	54441864	59211360	94194352	104920688	90152800	100143032	98793736	71916752	77811800	78374408	78971032	77090560	84130576	0.0457675		M-H	8.99667	794.508
Lipidomics	Phosphatidylglycerol(acyl)	PG(aa-38:6)	1.18577	0.112467	5.03997e+07	5.97623e+07	58422192	48376980	49025740	49025852	47147720	61559832	60648716	42661844	64667020	69274024	53624396	58552832	53845460	55024756	53254680	56567456	0.0355375		M-H	9.08805	794.508
Lipidomics	Phosphatidylglycerol(acyl)	PG(aa-38:7)	1.56764	0.000157188	4.24995e+06	6.66238e+06	4.18039e+06	4291762	4065703	3.95172e+06	4.76016e+06	6336121	7234987	6374194	6.04148e+06	7.32513e+06	4695001	4.1738e+06	5752150	6.51778e+06	5505271	6447122	0.155141		M-H	9.00309	792.492
Lipidomics	Phosphatidylglycerol(acyl)	PG(aa-38:7)	1.91794	0.0239635	1.10522e+07	2.11975e+07	10148497	13086770	10526433	10793551	10705805	24751250	21343364	10069081	26501626	23322146	16238325	14724003	14981962	14534383	15046615	14181044	0.0439403		M-H	8.88302	792.493
Lipidomics	Phosphatidylglycerol(acyl)	PG(aa-40:6)	1.41935	0.0080471	3.89332e+06	5.52598e+06	4.00132e+06	3.81478e+06	4.08631e+06	3.027e+06	4537190	4738113	6935892	5.3559e+06	5.34032e+06	5259671	3943723	4548989	4707642	4440742	4581716	4.8464e+06	0.0679245		M-H	9.13838	822.538
Lipidomics	Phosphatidylglycerol(acyl)	PG(aa-40:7)	0.929459	0.555419	4.9684e+08	4.61792e+08	500120352	518635392	474500896	446953728	543987460	536881090	482594816	254929184	500853248	533701184	500045120	446331200	490207360	480416672	483980384	475919872	0.0384208		M-H	9.06944	820.524
Lipidomics	Phosphatidylglycerol(acyl)	PG(aa-40:8)	2.1029	0.000114939	1.08287e+08	2.27717e+08	124701992	117139968	104051712	92314896	103228440	225928352	212975136	270139392	200995136	228547440	164591456	162059552	168865264	173052640	178157152	184176640	0.0491047		M-H	8.97918	818.508
Lipidomics	Phosphatidylglycerol(acyl)	PG(aa-40:9)	2.00218	0.0155914	10727514	2.14784e+07	10605139	12914564	10406085	10132477	9579305	24004568	20345136	11322595	25864608	25855144	15975357	15015014	14658590	13358520	14345773	14110252	0.0555493		M-H	8.87077	816.493
Lipidomics	Phosphatidylglycerol(acyl)	PG(aa-42:8)	3.238	0.00160636	1.40054e+07	4.53495e+07	12929569	14849516	13629001	13028404	15590544	49022064	45742092	30860232	44289432	56833612	24750168	27173824	26742190	25105240	27585754	29991608	0.0828043		M-H	9.10439	846.537
Lipidomics	Phosphatidylglycerol(acyl)	PG(aa-42:9)	1.43401	0.0667884	9.88515e+07	1.41754e+08	90852416	106267888	91781496	93820232	111535312	139940368	168170400	76947336	150188368	173525264	112753184	121997024	121993736	120147816	115187040	120959056	0.037461		M-H	9.02396	844.522
Lipidomics	Phosphatidylglycerol(acyl)	PG(aa-42:10)	1.56584	1.1791e-05	2.21947e+08	3.47532e+08	244271712	227690352	221427328	194504912	221840032	350961728	331539936	375021312	320260448	359878464	293419840	276198144	300021280	299627392	310906784	315681184	0.045516		M-H	8.97616	842.508
Lipidomics	Phosphatidylglycerol(acyl)	PG(aa-42:11)	1.67601	0.0329642	2.46549e+07	4.13217e+07	24578500	30081730	25212166	20598346	22803700	43704560	41019344	21240382	50791948	49852408	35635060	30014456	31726046	30161876	33678956	31988960	0.0610384		M-H	8.86682	840.493
Lipidomics	Phosphatidylglycerol(acyl)	PG(aa-44:11)	1.65178	0.0142687	2.80529e+07	4.63371e+07	21325872	32001492	27540470	25417560	33978868	36592448	62859416	46625000	37391540	48217320	36075572	37651984	43319856	42338508	39422284	44933360	0.0931285		M-H	9.04697	868.522
Lipidomics	Phosphatidylglycerol(acyl)	PG(aa-44:12)	1.82538	1.52252e-08	807832614	1474602266	814472770	840241660	808548610	751972860	823927170	1475892100	1464823170	1417148540	1470649470	1544498050	1168457980	1177002880	1151540860	1162754430	1176564350	1205721600	0.0145504		M-H	8.96555	866.508
Lipidomics	Phosphatidylinositol(acyl)	PI(aa-32:2)	1.24384	0.202801	177596	220901	212017	195309	188634	155364	136654	279121	213685	125251	264933	221514	291209	187109	223165	174345	179155	141945	0.239453		M-H	8.88677	806.492
Lipidomics	Phosphatidylinositol(acyl)	PI(aa-34:2)	0.874612	0.112349	2.05982e+08	1.80155e+08	210990064	212355488	199681472	192799936	214084896	200993600	189795984	130627504	194730304	184625712	201009312	202840336	208397856	209376896	200429424	207830960	0.0207931		M-H	9.08568	834.523
Lipidomics	Phosphatidylinositol(acyl)	PI(aa-34:3)	0.660991	0.00111516	1.23912e+07	8190493	14454275	12331276	11428452	11903435	11838709	8645205	8657702	5662559	9233793	8753206	9594147	10739387	10297109	10902584	10117338	10696781	0.0442953		M-H	9.02925	832.508
Lipidomics	Phosphatidylinositol(acyl)	PI(aa-34:4)	0.818911	0.0193109	2.88879e+06	2.36566e+06	3.2006e+06	3005645	2.8727e+06	2632979	2.73204e+06	2170063	2.14149e+06	2.11791e+06	2.82926e+06	2.56959e+06	2.46065e+06	2292756	2.8542e+06	3056291	3.31369e+06	2822824	0.122543		M-H	8.92496	830.493
Lipidomics	Phosphatidylinositol(acyl)	PI(aa-36:1)	0.715219	0.000107631	3596126870	2572017612	3883626750	3578246140	3570417660	3452758780	3495585020	2576865020	2565343490	2518917120	2577698560	2621263870	3058654980	3134694660	3078678270	3094367740	3200643330	3060596740	0.0160894		M-H	9.53704	864.571
Lipidomics	Phosphatidylinositol(acyl)	PI(aa-36:2)	0.527192	1.8375e-06	2.51063e+07	1.32358e+07	25528312	23516498	27541140	23830300	25115296	15067779	13686467	11459134	13622932	12342894	19416172	18653550	16382798	16546290	16119152	14670550	0.114366		M-H	9.33223	862.555
Lipidomics	Phosphatidylinositol(acyl)	PI(aa-36:2)	0.242679	2.35704e-11	5.90068e+07	1.43197e+07	58493624	60535520	60197580	58761892	57045572	16126528	14583649	12898299	14505376	13484746	30084628	33204054	32043866	29292048	36259512	29556236	0.0788535		M-H	9.42231	862.555
Lipidomics	Phosphatidylinositol(acyl)	PI(aa-36:3)	1.38147	0.0868478	60843544	8.40538e+07	51840968	62010496	60646032	76213760	53506464	70074936	94484832	119655408	66213776	69840200	56976848	66363588	61521384	63848236	60495016	74329264	0.0856506		M-H	9.15183	860.538
Lipidomics	Phosphatidylinositol(acyl)	PI(aa-36:4)	1.10004	0.0716952	1896002664	2085688040	2017049860	1903990530	1915798020	1762676220	1880498690	2078896260	1949299580	1884396930	2252875010	2262972420	1915623170	1850012420	1893025280	1853364610	1986062210	1960884610	0.0323602		M-H	9.08793	858.523
Lipidomics	Phosphatidylinositol(acyl)	PI(aa-36:5)	0.915186	0.29628	1.64558e+08	1.50602e+08	165013824	163501104	151040208	169830400	173406368	132830112	155480992	116965968	175965680	171764976	138849760	147514512	163516096	156778640	156212896	167169648	0.06147		M-H	9.01641	856.508
Lipidomics	Phosphatidylinositol(acyl)	PI(aa-38:0)	0.921521	0.726869	925455	852826	1.34171e+06	843629	1.24496e+06	844480	352493	803586	675444	1120045	652297	1.01276e+06	594868	999784	755416	932758	579529	650170	0.278195		M-H	9.88595	894.616
Lipidomics	Phosphatidylinositol(acyl)	PI(aa-38:1)	0.477326	3.58434e-05	2.78734e+06	1.33047e+06	2.74073e+06	2.52533e+06	3064757	2866444	2739456	1.29028e+06	1.26428e+06	1.03193e+06	1.2449e+06	1.82097e+06	1.46079e+06	1.28548e+06	1.31668e+06	1.83064e+06	1.10738e+06	1.58234e+06	0.18665		M-H	9.75546	892.6
Lipidomics	Phosphatidylinositol(acyl)	PI(aa-38:1)	0.739867	0.0113145	4.84222e+06	3.5826e+06	4325049	5288130	5.07604e+06	5.08131e+06	4.44054e+06	4487216	3.23523e+06	2648038	3.65503e+06	3.88746e+06	4058678	3.12433e+06	3.06143e+06	3.65721e+06	4.18756e+06	3.98213e+06	0.120645		M-H	9.83662	892.602
Lipidomics	Phosphatidylinositol(acyl)	PI(aa-38:2)	3.44018	1.2329e-05	6.74771e+06	2.32133e+07	6.37854e+06	7.79235e+06	6886343	5960817	6720510	24484428	21912414	20750654	23178472	25740748	14925507	16467446	15382341	13983046	16321307	14666171	0.0631447		M-H	9.67241	890.586
Lipidomics	Phosphatidylinositol(acyl)	PI(aa-38:3)	0.512636	2.13865e-06	1223425048	627172082	1174445440	1268450300	1257848320	1255910780	1160470400	600198780	642170110	620966850	626095680	646428990	801094910	841548860	808269760	811602240	829987840	818574910	0.0166808		M-H	9.53579	888.571
Lipidomics	Phosphatidylinositol(acyl)	PI(aa-38:4)	0.474994	7.28149e-07	4984008400	2367375256	4650957300	5071429600	5376250400	4997507100	4823897600	2251118850	2334981890	2604679420	2199005180	2447090940	3029336320	3075583740	3146191870	3232963840	3259933180	3182792700	0.0259717		M-H	9.4011	886.556
Lipidomics	Phosphatidylinositol(acyl)	PI(aa-38:4)	0.936931	0.109089	7418008260	6950163360	7503649300	7558498800	7200116700	7088025600	7739750900	7170391600	6948370900	6120203800	7115146800	7396703700	7393015800	7276279800	7396152800	7248135200	7178492400	7277206500	0.011935		M-H	9.24377	886.554
Lipidomics	Phosphatidylinositol(acyl)	PI(aa-38:5)	1.27617	0.523963	3.76826e+06	4808930	2.24513e+06	3895673	4.61563e+06	4901589	3.1833e+06	2.93537e+06	4.15226e+06	10499510	3.06632e+06	3.3912e+06	2.94021e+06	2488958	3850632	3.46591e+06	3431402	2942778	0.141385		M-H	9.25682	884.539
Lipidomics	Phosphatidylinositol(acyl)	PI(aa-38:5)	1.03137	0.455664	2197534412	2266472908	2198715390	2300124670	2172227070	2149560830	2167044100	2445214460	2355260670	1979492100	2339821570	2212575740	2242356480	2214340860	2319890180	2257700860	2218797570	2280374530	0.0167412		M-H	9.1344	884.539
Lipidomics	Phosphatidylinositol(acyl)	PI(aa-38:6)	0.780909	0.425294	977372	763239	1.06654e+06	921515	1.30696e+06	772213	819633	876209	140990	1.5379e+06	554529	706568	1074696	833043	642572	896147	900813	916914	0.158545		M-H	8.93082	882.525
Lipidomics	Phosphatidylinositol(acyl)	PI(aa-38:6)	0.997464	0.971333	5.37766e+08	5.36402e+08	609948480	568558210	500376096	458056896	551888060	548852930	533468096	441197888	573869760	584619140	548221700	556048190	540652350	535241344	542054530	550244100	0.0138244		M-H	9.06187	882.523
Lipidomics	Phosphatidylinositol(acyl)	PI(aa-40:2)	1.00472	0.966593	1.65547e+06	1.66329e+06	2.22175e+06	1.49396e+06	1457083	1.53692e+06	1.56766e+06	1.42789e+06	1.66891e+06	1404326	1935421	1879884	1.80415e+06	1.66968e+06	1.52971e+06	1.48578e+06	1.82603e+06	1.42041e+06	0.095705		M-H	9.82099	918.617
Lipidomics	Phosphatidylinositol(acyl)	PI(aa-40:4)	0.901033	0.790831	2.14459e+07	1.93235e+07	23097620	17483674	35722444	16699150	14226849	33126298	6712245	8.29253e+06	37690864	10795547	9021853	9693822	11840291	11442952	13969973	11994656	0.164184		M-H	9.65288	914.585
Lipidomics	Phosphatidylinositol(acyl)	PI(aa-40:5)	0.343891	6.582e-06	1.88512e+08	6.48277e+07	186164400	189308608	202353888	197517488	167217008	67738768	65456260	65533528	56443560	68966136	91962832	97258440	95689504	98804224	100941384	97990448	0.033978		M-H	9.5023	912.569
Lipidomics	Phosphatidylinositol(acyl)	PI(aa-40:6)	0.894979	0.00134294	236951968	212067024	240135712	247430400	238182848	231053776	227957104	201316592	214993584	209689728	209701616	224633600	202908544	205784064	214140912	210168960	211405632	210953696	0.0190161		M-H	9.36335	910.553
Lipidomics	Phosphatidylinositol(acyl)	PI(aa-40:8)	0.953515	0.731209	1.5766e+08	1.50331e+08	188771936	152418448	130513096	148816672	167779616	147538304	154988688	86730200	166674400	195723904	140443456	173812080	155021536	156569680	151930976	158576192	0.0635368		M-H	9.02487	906.523
Lipidomics	Phosphatidylinositol(acyl)	PI(aa-40:9)	0.788856	0.119927	3.74258e+06	2.95236e+06	4.70715e+06	3746432	3244292	3985971	3.02905e+06	2.13293e+06	2.4695e+06	2.70815e+06	4.03668e+06	3414517	3.54416e+06	3.25735e+06	3245910	3.19124e+06	3.8541e+06	2.0362e+06	0.18586		M-H	8.93464	904.508
Lipidomics	Phosphatidylserine(acyl)	PS(aa-34:0)	0.84987	0.575019	2.78724e+07	23687919	22881490	25617724	46834492	24247312	19781028	32753214	21613116	11227572	38664000	14181693	16099371	20876556	17862984	16538392	16766826	16620432	0.102963		M-H	9.55898	763.535
Lipidomics	Phosphatidylserine(acyl)	PS(aa-34:2)	1.08323	0.216069	2.87175e+07	31107554	24067694	28569298	31978986	27470912	31500382	27961248	32660504	33845792	30683336	30386890	26441786	32011292	31335888	31065206	31275420	32897366	0.0671382		M-H	9.07443	759.504
Lipidomics	Phosphatidylserine(acyl)	PS(aa-36:0)	1.09041	0.0230568	2.66015e+08	2.90064e+08	264091808	257882096	257830640	270926464	279341760	267208416	303010560	299298432	280297760	300507264	268145248	283058816	291644704	278498336	292018816	292650624	0.0315581		M-H	9.83905	791.564
Lipidomics	Phosphatidylserine(acyl)	PS(aa-36:1)	1.0422	0.505653	28814659160	30030524820	28420077600	28205457400	32879689700	27128176600	27439894500	33685608400	30336495600	26707550200	32354095100	27068874800	29090310100	29042982900	28178612200	28558506000	28753631200	28197390300	0.0130603		M-H	9.54179	789.55
Lipidomics	Phosphatidylserine(acyl)	PS(aa-36:2)	0.743542	0.0203973	3.02514e+07	2.24932e+07	28523458	26802046	36825952	29406500	29698798	19335980	21659932	30424480	21593928	19451442	21907448	23432566	26464364	24793252	24661568	23747852	0.062775		M-H	9.40867	787.534
Lipidomics	Phosphatidylserine(acyl)	PS(aa-36:4)	0.810374	0.00740055	7.49228e+07	6.07155e+07	84212088	72075248	72987464	70129912	75209424	62003772	51973824	55969088	69369456	64261424	69307888	65374804	69563544	64182864	68999600	68456656	0.0336012		M-H	9.10303	783.502
Lipidomics	Phosphatidylserine(acyl)	PS(aa-36:5)	0.838881	0.0748522	3.03871e+06	2.54911e+06	2.92829e+06	2562181	2798518	3429242	3.4753e+06	2.16236e+06	2.36211e+06	2.64548e+06	3096836	2.47878e+06	2.34132e+06	2.39296e+06	2.29902e+06	2.35669e+06	2.66478e+06	2.91848e+06	0.162418		M-H	9.02333	781.488
Lipidomics	Phosphatidylserine(acyl)	PS(aa-38:0)	1.05332	0.0462357	972942618	1024823092	977103420	973585020	983679620	972663940	957681090	1005317060	1048301180	1085116420	1001391170	983989630	951200770	965242370	976313340	995869440	964381120	967386940	0.0142495		M-H	10.0793	819.596
Lipidomics	Phosphatidylserine(acyl)	PS(aa-38:1)	0.72752	1.64048e-05	621165044	4.5191e+08	621137860	635095300	652836030	604393660	592362370	502343136	446878656	439432576	452170112	418726176	515943616	500421856	491038848	496502208	514367584	488683648	0.0245604		M-H	9.8737	817.58
Lipidomics	Phosphatidylserine(acyl)	PS(aa-38:2)	0.894016	0.630231	6.08286e+07	54381712	62953288	56994880	75556568	55203720	53434296	86806688	33182648	38048328	79906384	33964512	38161344	40652624	45283276	43943244	47018848	45881692	0.0830279		M-H	9.72921	815.565
Lipidomics	Phosphatidylserine(acyl)	PS(aa-38:2)	1.39277	0.0817619	885882366	1233827058	870318270	805769340	1161622780	747010050	844691390	1631494400	1240102780	817768510	1476093180	1003676420	1031105280	984820800	920209410	924837250	919518210	910369150	0.0505081		M-H	9.55518	815.565
Lipidomics	Phosphatidylserine(acyl)	PS(aa-38:3)	0.594002	0.000897678	4.03073e+06	2.39426e+06	4288270	4.3207e+06	3.28115e+06	4311917	3951623	2359222	2467915	2.52263e+06	2.29738e+06	2.32417e+06	2525306	2.771e+06	3.24302e+06	2.96488e+06	3.49021e+06	3.23121e+06	0.115979		M-H	9.67118	813.55
Lipidomics	Phosphatidylserine(acyl)	PS(aa-38:3)	0.850907	0.0411417	5.78631e+07	4.92361e+07	57436008	61347656	59544944	57734988	53251972	58708516	47063144	40704384	51936848	47767816	59452216	56339496	44576732	51109484	52943488	49384660	0.108491		M-H	9.43683	813.548
Lipidomics	Phosphatidylserine(acyl)	PS(aa-38:3)	0.409446	3.86574e-05	1207223374	4.94293e+08	1104469120	1155245700	1382830210	1236154110	1157417730	541493250	499984576	483932224	507408000	438647296	597272000	602249470	611479170	644040060	631999550	603665730	0.0282507		M-H	9.53436	813.55
Lipidomics	Phosphatidylserine(acyl)	PS(aa-38:4)	0.963841	0.918385	3.40405e+08	3.28097e+08	240739280	272549376	664372100	263807872	260556704	551086080	244059504	151649056	505869696	187818256	226343840	224264912	197090176	192870720	204829216	191959792	0.0700042		M-H	9.54912	811.533
Lipidomics	Phosphatidylserine(acyl)	PS(aa-38:4)	0.597077	0.000335874	102001768	6.09029e+07	96696912	99503000	122250056	99721528	91837344	58854176	57587380	75082048	55745576	57245544	67274832	68875232	68781960	72427184	74182928	66091520	0.0436619		M-H	9.44375	811.534
Lipidomics	Phosphatidylserine(acyl)	PS(aa-38:4)	1.54668	2.07377e-05	485969888	751638746	505926304	480814656	469176896	470455872	503475712	738716420	738474620	705434370	760945920	814622400	622172290	615199680	634222660	610005440	622447100	620323330	0.0120726		M-H	9.29042	811.534
Lipidomics	Phosphatidylserine(acyl)	PS(aa-38:5)	0.95587	0.278919	1.58585e+08	1.51586e+08	153471296	160532256	168183840	159901920	150834272	147266176	147984016	136654560	161840544	164186720	141411680	148534688	161447936	157322000	151575360	159483648	0.0513454		M-H	9.16531	809.517
Lipidomics	Phosphatidylserine(acyl)	PS(aa-38:6)	0.346825	0.000221245	8092367	2.80663e+06	7289021	7864197	9561389	9438302	6308926	1.81508e+06	2623372	4801261	2.67761e+06	2115837	3.23481e+06	3.38895e+06	5625732	5712507	5274859	5.55007e+06	0.226701		M-H	9.20154	807.504
Lipidomics	Phosphatidylserine(acyl)	PS(aa-38:6)	0.618354	1.75033e-05	3.69382e+08	2.28409e+08	393636640	362283136	371312320	339839968	379839552	220146688	226328736	190355888	254981280	250233056	302425952	302815456	309714720	296624416	311663264	301774624	0.0173999		M-H	9.0888	807.503
Lipidomics	Phosphatidylserine(acyl)	PS(aa-38:7)	0.653629	0.0057188	5.15265e+06	3.36792e+06	4423132	5779109	5063161	5.16666e+06	5331184	3.53455e+06	3205868	1.99436e+06	4.08816e+06	4016662	4.7562e+06	4.22784e+06	4451235	4410621	3967330	4197717	0.0591371		M-H	8.95175	805.488
Lipidomics	Phosphatidylserine(acyl)	PS(aa-40:0)	1.02115	0.325906	856395468	874506024	848413120	839472130	902596670	848474300	843021120	888167940	866845250	917082050	853317570	847117310	849516860	843369090	847268990	877170620	858139580	838384640	0.0153509		M-H	10.2991	847.628
Lipidomics	Phosphatidylserine(acyl)	PS(aa-40:1)	1.02926	0.312259	208516064	2.14618e+08	208358400	208752528	202907360	214209040	208352992	215922768	223529536	221935184	216724592	194976224	206377520	208845360	212875936	220543552	207781840	215292416	0.0341991		M-H	10.1538	845.612
Lipidomics	Phosphatidylserine(acyl)	PS(aa-40:2)	1.02083	0.477789	5.21503e+07	5.32367e+07	52924724	51559232	52379292	54531896	49356112	49169460	56465040	53434824	54047056	53067132	49780716	52375004	54548016	52935088	55392864	56101088	0.0469173		M-H	10.0014	843.596
Lipidomics	Phosphatidylserine(acyl)	PS(aa-40:3)	0.757648	0.00223957	1.14825e+08	8.69972e+07	106416128	118827752	131213472	111299120	106369976	101778752	81725744	86987784	77027600	87466088	96536168	87285776	84319232	96102672	94712512	83793064	0.0649921		M-H	9.78836	841.58
Lipidomics	Phosphatidylserine(acyl)	PS(aa-40:3)	0.992179	0.656716	582030974	577478936	573662460	580117060	584960510	591897340	579517500	552813630	586056450	568468860	572858300	607197440	567728260	586181440	594976060	572826050	597677890	604340220	0.0228233		M-H	9.9162	841.58
Lipidomics	Phosphatidylserine(acyl)	PS(aa-40:4)	0.788047	0.000334185	2.96051e+07	2.33302e+07	28071520	28228882	29272880	31512648	30939792	21508552	22434332	22400036	24707708	25600544	24550648	25681980	27171470	27424102	27912902	27489452	0.0448376		M-H	9.77002	839.565
Lipidomics	Phosphatidylserine(acyl)	PS(aa-40:4)	1.10863	0.450896	8311341780	9214224800	7420936700	7541826600	10753176600	7604710900	8236058100	11810142200	8582938600	6345623600	10650434600	8681985000	8449598500	8045222400	7775486000	7493079000	7726382100	7546759700	0.044341		M-H	9.55715	839.565
Lipidomics	Phosphatidylserine(acyl)	PS(aa-40:5)	0.345085	0.06946	11590385	3.99967e+06	10959544	7.89983e+06	23579742	9096413	6.41639e+06	5002716	3183880	3379692	4563911	3.86816e+06	4506027	5.52787e+06	6029389	4844210	5952082	5555230	0.120476		M-H	9.65058	837.55
Lipidomics	Phosphatidylserine(acyl)	PS(aa-40:5)	0.28799	1.53783e-05	2954246554	850792346	2724039170	2861404160	3257089280	3052962300	2875737860	800349500	869918460	884153220	844863620	854676930	1431902210	1478668540	1481598460	1522163970	1568999940	1498680580	0.0285608		M-H	9.53365	837.55
Lipidomics	Phosphatidylserine(acyl)	PS(aa-40:6)	0.619608	1.02935e-06	4196247498	2600029694	4074411520	4150719230	4546330100	4123125760	4086650880	2434230270	2559723520	2849367550	2558252540	2598574590	2885947900	2954641410	3065380350	3091162110	3113238020	3060739840	0.0273159		M-H	9.38801	835.534
Lipidomics	Phosphatidylserine(acyl)	PS(aa-40:6)	0.643474	0.00926593	5.72306e+08	3.68264e+08	512352704	511787200	757488450	518390912	561512830	440795808	360439264	280735808	448938688	310412000	349314240	356741696	351892064	359999840	367673216	365134592	0.0251368		M-H	9.55048	835.534
Lipidomics	Phosphatidylserine(acyl)	PS(aa-40:7)	1.50865	0.0269687	6.24774e+06	9.42563e+06	5200142	10053807	5728901	5.56389e+06	4.69198e+06	8651355	9426023	10710447	8864165	9476153	6424205	7.12069e+06	6.145e+06	7081849	6.51065e+06	7.28003e+06	0.0688858		M-H	9.28654	833.518
Lipidomics	Phosphatidylserine(acyl)	PS(aa-40:7)	0.917824	0.0315239	3.19948e+08	2.93656e+08	322692704	324510016	320923456	315072608	316540512	308072160	304679296	265184928	305525920	284816064	293436448	293473568	328140928	318906304	307660160	323506752	0.0512837		M-H	9.12174	833.518
Lipidomics	Phosphatidylserine(acyl)	PS(aa-40:8)	1.58189	0.000810558	2.38751e+06	3.77679e+06	2674819	2089208	2.67477e+06	2.07316e+06	2.42561e+06	3.23826e+06	3524748	4450574	3.95608e+06	3.71428e+06	3.22388e+06	2427470	3075851	3.28144e+06	2.88084e+06	2.98719e+06	0.0946572		M-H	9.15523	831.503
Lipidomics	Phosphatidylserine(acyl)	PS(aa-40:8)	0.616413	0.000683803	2.23035e+07	1.37482e+07	26835950	22026622	19652494	22335066	20667470	14006833	14331914	10401998	14952163	15047995	15967075	18878230	18687554	18141410	17862748	18518074	0.0541774		M-H	9.03265	831.504
Lipidomics	Phosphatidylserine(acyl)	PS(aa-40:9)	0.351188	0.000366633	2.30552e+06	809669	2.58386e+06	2.09714e+06	2311602	2.49573e+06	2.03925e+06	943737	850969	83366.9	1.00043e+06	1169841	1.57894e+06	1.52873e+06	1.36432e+06	1635943	1.74189e+06	1404523	0.0963227		M-H	8.937	829.487
Lipidomics	Phosphatidylserine(acyl)	PS(aa-42:0)	0.573521	4.51139e-07	1.11497e+08	6.39457e+07	106907632	107893120	116713648	110921440	115047184	62389876	63616276	61908344	67875616	63938252	71837336	75946400	79720280	85867568	82829048	85357448	0.0635642		M-H	10.4885	875.658
Lipidomics	Phosphatidylserine(acyl)	PS(aa-42:1)	0.674318	0.00288915	3.26612e+07	2.2024e+07	35069496	31304568	34619672	30906458	31405750	28515668	21501760	16408606	21490152	22203920	30412612	29266724	26290488	25989628	24184270	24091896	0.0899513		M-H	10.1575	873.643
Lipidomics	Phosphatidylserine(acyl)	PS(aa-42:1)	1.13372	0.000705584	6.42033e+07	7.27884e+07	65828664	62425620	65260496	65407976	62093720	71390872	73220832	74356952	68886872	76086296	67572760	63980196	70045616	69360056	70200408	66908996	0.0361186		M-H	10.3562	873.644
Lipidomics	Phosphatidylserine(acyl)	PS(aa-42:2)	0.926273	0.168682	2.3645e+07	2.19017e+07	23476770	23445650	23590552	23719014	23993056	18886814	21906564	21584412	21716982	25413940	22037208	24199922	22641828	25268440	25214708	23464556	0.0563997		M-H	10.2476	871.627
Lipidomics	Phosphatidylserine(acyl)	PS(aa-42:2)	1.38102	0.00675345	63273944	8.73829e+07	69715016	63912076	63363624	57299524	62079480	96087752	87407488	68955088	86341968	98122120	79705744	75669808	80239032	70266800	72003896	73895456	0.0512003		M-H	10.0117	871.626
Lipidomics	Phosphatidylserine(acyl)	PS(aa-42:3)	0.807534	0.204015	2.06352e+06	1.66636e+06	1913286	2029877	2.75155e+06	2.10987e+06	1.51304e+06	2.09936e+06	1.35473e+06	1.76773e+06	1.04166e+06	2.06833e+06	2.06413e+06	1.56443e+06	1.78566e+06	1.7425e+06	1.46637e+06	1.33704e+06	0.149036		M-H	9.8891	869.613
Lipidomics	Phosphatidylserine(acyl)	PS(aa-42:3)	0.9319	0.00297075	4.12142e+08	3.84075e+08	401828192	415198560	415636768	421733056	406312832	380803392	373200416	400678112	374491936	391200832	381403776	398236384	401941056	400113344	402598784	393687008	0.0264347		M-H	10.1548	869.613
Lipidomics	Phosphatidylserine(acyl)	PS(aa-42:4)	0.99124	0.84105	1.1414e+08	1.1314e+08	116656640	112527288	106557672	121251392	113707240	113897264	120828504	97296656	115532536	118146064	106324384	113999888	124192040	118391832	123218296	128206248	0.0634239		M-H	9.99624	867.595
Lipidomics	Phosphatidylserine(acyl)	PS(aa-42:5)	0.996845	0.898808	870010278	867265306	881058750	866715900	873218300	852010180	877048260	820926210	865667070	845958140	864357380	939417730	850675460	862831170	866319230	866252100	886989630	890182210	0.01625		M-H	9.8691	865.58
Lipidomics	Phosphatidylserine(acyl)	PS(aa-42:6)	0.570918	2.68726e-06	3.49379e+07	1.99467e+07	35110016	34469384	37164272	35012200	32933530	21074560	16926056	18588376	21712120	21432232	20867974	22164274	24456622	24580062	25240308	24571212	0.0732245		M-H	9.70341	863.566
Lipidomics	Phosphatidylserine(acyl)	PS(aa-42:6)	0.750241	0.0259972	2.24275e+08	1.68261e+08	223688704	209113392	274677184	201515872	212382032	198513136	157787712	128964240	210722784	145315296	191366416	178538272	171618976	165430832	162561152	170634448	0.0548718		M-H	9.55691	863.566
Lipidomics	Phosphatidylserine(acyl)	PS(aa-42:7)	1.26736	0.423786	1.11984e+08	141923752	87115184	86464304	192659616	97552208	96128584	219240976	106254680	84569344	204666816	94886944	95009576	92205944	94440832	73861784	97590088	87461128	0.0971194		M-H	9.56624	861.552
Lipidomics	Phosphatidylserine(acyl)	PS(aa-42:9)	0.911663	0.00108943	1.35939e+08	1.2393e+08	138836880	133881424	130912632	134740784	141321152	119775872	124180408	123634032	123190856	128869424	130094832	128548744	136700560	133135712	132356696	128159624	0.0225127		M-H	9.33228	857.517
Lipidomics	Phosphatidylserine(acyl)	PS(aa-42:10)	0.85024	0.191431	1.17951e+08	1.00287e+08	131178136	110084304	107138176	118111880	123242040	107087520	100786432	59032812	111350896	123175152	94226848	106146800	108326336	105944712	106351152	105879280	0.0463008		M-H	9.02321	855.503
Lipidomics	Phosphatidylserine(acyl)	PS(aa-42:11)	0.694504	0.00243187	11901437	8265592	13742634	11871174	11821960	11288045	10783372	7093055	8580202	6545913	10058704	9050086	11148409	9018042	11714948	11178525	11968800	10223482	0.0956324		M-H	8.92286	853.488
Lipidomics	Phosphatidylserine(acyl)	PS(aa-44:0)	0.674111	6.50095e-07	2.53248e+08	1.70717e+08	264427136	248808400	250874800	247469184	254658448	182169536	165144800	169013200	159097280	178159648	210414784	210320384	215146096	217012848	219271024	219748256	0.0190427		M-H	10.6787	903.69
Lipidomics	Phosphatidylserine(acyl)	PS(aa-44:1)	0.718511	8.82561e-07	59465644	42726692	62016712	58333760	58758520	57114408	61104820	42684292	41976448	42007920	41081696	45883104	46987744	47196696	48821084	52793464	50835796	49695760	0.0420943		M-H	10.5288	901.674
Lipidomics	Phosphatidylserine(acyl)	PS(aa-44:2)	0.914672	0.51991	2.32432e+06	2.12599e+06	2805267	1.79023e+06	2.78454e+06	2.13457e+06	2106996	1.9146e+06	2465130	1.92359e+06	1.56283e+06	2763806	2620597	2.28254e+06	2.19953e+06	2.61495e+06	2534874	2.93522e+06	0.095536		M-H	10.4205	899.66
Lipidomics	Phosphatidylserine(acyl)	PS(aa-44:3)	0.891526	0.00410149	3.9439e+07	3.51609e+07	38128380	37475136	41349112	40904788	39337676	34614168	33334266	36525644	33963028	37367492	33778652	35225148	37205648	39343568	37996212	36327660	0.0497233		M-H	10.3411	897.643
Lipidomics	Phosphatidylserine(acyl)	PS(aa-44:4)	1.03229	0.605374	7.4783e+06	7.71976e+06	8212128	6412690	6935985	7762891	8067804	7907987	8609890	6867811	7.7556e+06	7457524	6.9529e+06	6.78039e+06	6.62756e+06	7.96939e+06	8629820	7857275	0.105777		M-H	10.2277	895.628
Lipidomics	Phosphatidylserine(acyl)	PS(aa-44:5)	0.775153	0.243741	3.086e+06	2.39212e+06	1945773	4210680	3.88459e+06	2.46863e+06	2.92032e+06	3.1382e+06	1.75699e+06	3.19249e+06	1.47968e+06	2393244	2582439	2153634	2.21196e+06	2833700	2.84538e+06	2.03914e+06	0.133686		M-H	10.0398	893.612
Lipidomics	Phosphatidylserine(acyl)	PS(aa-44:5)	0.921456	0.0240722	195175712	1.79846e+08	198173280	198900672	187987920	196462992	194353696	167948432	174100672	192513152	176612784	188054384	179138256	180928928	191197968	190528800	197534272	193723632	0.046047		M-H	10.1434	893.612
Lipidomics	Phosphatidylserine(acyl)	PS(aa-44:6)	0.991252	0.802299	6.77153e+07	6.7123e+07	67754688	69005232	65251192	71521272	65044144	64113272	71687832	61226696	69375736	69211256	62774804	66238928	72435120	65564036	71646040	72623736	0.058849		M-H	9.97088	891.596
Lipidomics	Phosphatidylserine(acyl)	PS(aa-44:6)	0.81512	0.0207945	22958206	18713704	21945110	22989904	24111084	23697404	22047528	21024700	19868442	14078644	19411514	19185220	21406412	20966804	20134900	20123848	20645470	20523394	0.0272873		M-H	9.87742	891.596
Lipidomics	Phosphatidylserine(acyl)	PS(aa-44:7)	1.40891	0.00319579	4.60698e+07	64908440	46660168	45939332	44978968	45514508	47256072	72052928	66094216	55953268	60092620	70349168	55195812	63798544	51224932	48602072	54589092	52795172	0.145556		M-H	9.78584	889.582
Lipidomics	Phosphatidylserine(acyl)	PS(aa-44:8)	1.77292	0.0595567	1.87063e+07	3.31647e+07	17609226	16526421	37268356	10325641	11801725	40143996	31805230	19032554	44899836	29942002	24501730	28265656	21412242	16217736	22768840	19498260	0.181513		M-H	9.61319	887.564
Lipidomics	Phytoceramide	Phytocer(22:0)	1.36116	0.0015583	4411108	6.00422e+06	4.57412e+06	4.68547e+06	4.51885e+06	3932772	4.34432e+06	5.15377e+06	6151456	5728971	6.62111e+06	6.36578e+06	5275538	5806978	3.81597e+06	5295184	5.595e+06	4928447	0.126121		M+Acid	10.5261	639.615
Lipidomics	Phytoceramide	Phytocer(23:0)	3.35128	7.61439e-05	1.52948e+06	5.1257e+06	1.59805e+06	1.48378e+06	1.45972e+06	1537693	1.56814e+06	4651614	4.66484e+06	5.13452e+06	5.32335e+06	5.85418e+06	3.73019e+06	3.61577e+06	3.25637e+06	3.26882e+06	3.38799e+06	3263265	0.0556044		M+Acid	10.6033	653.63
Lipidomics	Phytoceramide	Phytocer(24:0)	0.609013	0.000269476	1.11297e+07	6.77812e+06	11797170	10877172	11435918	10823801	10714365	6409316	6660461	5297988	8177275	7345568	10479109	9648493	9553031	10284399	9645262	10321723	0.0379507		M+Acid	10.6943	667.645
Lipidomics	Phytoceramide	Phytocer(24:1)	1.34424	0.00525898	8.39071e+06	1.12792e+07	9909427	8633998	8089495	7.05329e+06	8.26733e+06	9795312	11230914	13372973	10737765	11258850	10593145	9060300	9094990	9947147	10075808	9779033	0.0563423		M+Acid	10.5337	665.63
Lipidomics	Phytoceramide	Phytocer(25:1)	57.5773	1.15098e-05	26735	1.53933e+06	696.564	66743.7	8855.78	4352.82	53026.2	1.74152e+06	1.57289e+06	1.3725e+06	1.41948e+06	1.59026e+06	671535	624675	551542	590919	419762	419882	0.203081		M+Acid	10.766	679.644
GC/MS	PPP	Ribose-5-phosphate	0.735633	0.000113871	15900.6	11697	16286	16079	16162	14214	16762	11846	10798	11514	12078	12249	13958	15770	16457	17512	17798	17783	0.161108
Lipidomics	Sphinganines	Sphingosine-1-phosphate	1.28082	0.000598956	4.64484e+06	5949228	4802475	4696696	4754076	4394017	4.57696e+06	6110659	6.25386e+06	5373974	6.2422e+06	5765446	5.04918e+06	5008509	5.4355e+06	5.3127e+06	5454163	5.65208e+06	0.0432734		M-H	7.28328	379.248
Lipidomics	Sphinganines	Sphinganine-phosphate	0.90139	0.273781	1.29029e+06	1.16305e+06	1312804	1267127	1439270	1.11492e+06	1.31732e+06	1.33652e+06	1.33779e+06	879957	1.01242e+06	1.24858e+06	1.14002e+06	1.13197e+06	1.16232e+06	1.1917e+06	1.19998e+06	1.23727e+06	0.0310062		M+H	7.43589	381.264
Lipidomics	Sphingomyelin	SM(12:0)	1.06038	0.120078	1.05389e+06	1.11752e+06	1.034e+06	998776	1.11372e+06	1.08135e+06	1.04163e+06	1.07886e+06	1.16613e+06	1.05216e+06	1.20938e+06	1081081	838163	1.11352e+06	1.05461e+06	1.10988e+06	952346	967005	0.099685		M+H	9.16579	646.503
Lipidomics	Sphingomyelin	SM(13:0)	1.34246	0.000527138	1.15383e+06	1.54898e+06	1.10798e+06	1.33941e+06	1.07135e+06	1140971	1.10945e+06	1.68542e+06	1.57243e+06	1.39241e+06	1.47461e+06	1.62002e+06	1.19575e+06	1.33279e+06	1.36215e+06	1.2297e+06	1.19165e+06	1.27468e+06	0.0639624		M+H	9.29428	660.518
Lipidomics	Sphingomyelin	SM(14:0)	1.26361	4.1709e-06	524083636	662238440	526138592	524322208	522163040	508097760	539696580	667649540	675770370	632385860	679375740	656010690	619912000	616463810	614468670	620923780	616498300	614818620	0.0158054		M+H	9.464	674.536
Lipidomics	Sphingomyelin	SM(14:1)	1.47123	2.49345e-06	6578150	9.67795e+06	7.06496e+06	6.45716e+06	6625688	6073702	6669240	10191706	9833899	9074900	9878340	9410929	7377663	7551858	7.50887e+06	8381199	7914116	8.27547e+06	0.0512943		M+H	9.25124	672.519
Lipidomics	Sphingomyelin	SM(15:0)	1.83503	0.0136179	3.35747e+07	61610676	30882380	37297348	33451192	30847928	35394800	72942552	73487992	36070000	64361916	61190920	44223076	46671536	46266748	44814840	44051420	45319460	0.0219147		M+H	9.61997	688.551
Lipidomics	Sphingomyelin	SM(15:1)	1.15507	0.0626621	2.45207e+06	2.83231e+06	2.56733e+06	2.84636e+06	2.30964e+06	2.30549e+06	2231531	3.23332e+06	2.86583e+06	2399909	2.77569e+06	2.8868e+06	2333938	2591166	2.65733e+06	2793529	2.34339e+06	2562081	0.0665339		M+H	9.41708	686.536
Lipidomics	Sphingomyelin	SM(16:0)	1.49651	0.000440811	792868046	1186534282	798245060	834749570	795144960	753048380	783152260	1240700670	1256534780	1018334780	1191982590	1225118590	889586750	896667900	903646210	931375490	933306180	895001600	0.0222351		M+H	9.7529	702.566
Lipidomics	Sphingomyelin	SM(16:1)	1.19008	0.00519677	1457140378	1734118964	1376176380	1554809730	1427335300	1449364100	1478016380	1827492860	1759378050	1508544260	1788243970	1786935680	1550763520	1568951810	1593954560	1579947140	1541494400	1554506620	0.0115606		M+H	9.54474	700.551
Lipidomics	Sphingomyelin	SM(17:0)	1.14666	0.016616	1.76293e+07	20214786	15911384	18204354	19164130	17994006	16872540	18371072	20639128	22223294	20383078	19457358	18044586	18424598	18284472	19852332	19566372	19671574	0.0388115		M+H	9.88731	716.582
Lipidomics	Sphingomyelin	SM(17:1)	1.00647	0.94485	5.05046e+06	5.08313e+06	5086054	5.43253e+06	4747516	4.59272e+06	5393475	5131236	5738211	3.54845e+06	5.92262e+06	5.07514e+06	4602320	4779867	4528722	4.77118e+06	4854503	4611073	0.0300123		M+H	9.70182	714.567
Lipidomics	Sphingomyelin	SM(18:0)	0.992828	0.698219	1533269196	1522273074	1469586560	1516022400	1580911360	1571732990	1528092670	1497656060	1519688830	1477689980	1529431810	1586898690	1504083970	1524224510	1560414720	1547348610	1517594370	1571594750	0.0177248		M+H	10.0122	730.598
Lipidomics	Sphingomyelin	SM(18:1)	0.983005	0.511332	1721710464	1692449408	1700044290	1792879870	1715512450	1625544450	1774571260	1640023420	1725677060	1602222590	1729074430	1765249540	1616520580	1603555330	1638920190	1704877700	1665513600	1636869250	0.0206679		M+H	9.81677	728.583
Lipidomics	Sphingomyelin	SM(18:2)	1.10598	0.352419	3.42851e+07	37918512	30999310	36534480	33418188	32160732	38312936	44069968	44903072	26630476	36134908	37854136	34205252	34804056	33164560	33367128	34574288	33372144	0.0238133		M+H	9.61293	726.567
Lipidomics	Sphingomyelin	SM(19:0)	0.930472	0.121066	1.61685e+07	1.50443e+07	16603186	17382782	15443891	16183772	15228750	15045887	15614472	16634431	13896480	14030314	15776855	15938937	14760373	15688832	14509065	14939942	0.0375622		M+H	10.1409	744.615
Lipidomics	Sphingomyelin	SM(19:1)	1.73795	0.0934433	1.25861e+06	2.1874e+06	1.01147e+06	1.9135e+06	121600	1.55145e+06	1.69501e+06	3046682	2914401	1.04046e+06	1.94231e+06	1.99314e+06	2.6762e+06	2.21926e+06	1.6291e+06	1.51107e+06	1.90118e+06	1.57798e+06	0.216704		M+H	9.97053	742.6
Lipidomics	Sphingomyelin	SM(20:0)	0.974666	0.14382	3.29287e+08	3.20945e+08	333206464	336360480	323941824	325808352	327116224	321452896	311708192	318178368	316068800	337314400	334928672	333578368	331586400	328289408	324222848	337040128	0.0130058		M+H	10.2538	758.63
Lipidomics	Sphingomyelin	SM(20:1)	1.12187	0.080464	5.61768e+06	6.30231e+06	5.6166e+06	6.14226e+06	5.13133e+06	5.50204e+06	5.69618e+06	6671805	5875460	5401033	6623818	6.93943e+06	5.92876e+06	5371453	5.95074e+06	5598598	5.62305e+06	6371392	0.0589366		M+H	10.0937	756.615
Lipidomics	Sphingomyelin	SM(21:0)	1.45315	7.09747e-06	5.14306e+07	7.47366e+07	50979312	51696860	49232068	52517156	52727720	78179296	70964504	75414000	76790072	72335104	60458840	67390016	63686972	59817240	63511872	62710752	0.0393771		M+H	10.3549	772.646
Lipidomics	Sphingomyelin	SM(21:2)	0.914917	0.380516	2.17725e+07	1.992e+07	26205424	20956298	25768248	18262920	17669694	19097482	21377904	21395716	19829524	17899596	21461406	20439422	17941190	20984548	22011242	23286962	0.0857995		M+H	10.0639	768.616
Lipidomics	Sphingomyelin	SM(22:0)	0.732526	5.11709e-07	1064260698	779598926	1062998460	1083284480	1087009790	1029796100	1058214660	826058690	752520320	752226940	771300740	795887940	892833660	910188160	910278140	901637440	906259260	901771710	0.00887851		M+H	10.4358	786.661
Lipidomics	Sphingomyelin	SM(22:1)	1.36067	0.000583713	91484072	1.2448e+08	88176432	95149280	92345968	90134880	91613800	127873232	120379016	137710480	121103344	115333896	97092888	107018600	100221128	108559616	101490416	102440336	0.0381416		M+H	10.2934	784.646
Lipidomics	Sphingomyelin	SM(23:0)	1.27292	5.56817e-05	4.14263e+08	5.27324e+08	439756992	417435392	403259168	390162496	420698976	535648160	533176000	495254400	512443392	560095740	438112576	458046944	468046784	471099552	471913248	463468768	0.0300913		M+H	10.5481	800.676
Lipidomics	Sphingomyelin	SM(23:1)	2.21269	8.70244e-10	2.20438e+08	4.8776e+08	205838208	211936768	230598064	224181264	229634560	466707328	498150976	495402464	482741632	495798464	346360608	361947296	349323296	348148352	352916832	357481920	0.0177255		M+H	10.3849	798.661
Lipidomics	Sphingomyelin	SM(23:2)	0.757097	0.051692	4.58927e+06	3.47453e+06	5428927	3.70539e+06	5.64656e+06	4399586	3.76591e+06	3.51083e+06	3.36874e+06	4.11382e+06	2.75245e+06	3626785	5336831	3.87788e+06	3.40739e+06	3.51854e+06	4494828	4588218	0.183995		M+H	10.2435	796.645
Lipidomics	Sphingomyelin	SM(24:0)	0.670398	1.38118e-06	1658414284	1111797516	1744352000	1665938050	1671535360	1553406590	1656839420	1126376700	1102389250	1055749820	1091719550	1182752260	1307802620	1355179780	1357042050	1356035970	1370995970	1363630720	0.0215488		M+H	10.6217	814.69
Lipidomics	Sphingomyelin	SM(24:1)	1.23932	5.3497e-06	8696543640	10777832020	8971877400	8603785200	8816145400	8415159300	8675750900	10957705200	10724646900	11083716600	10268477400	10854614000	9551937500	9640166400	9590255600	9564914700	9637370900	9589511200	0.00848448		M+H	10.4542	812.674
Lipidomics	Sphingomyelin	SM(24:2)	1.2126	0.000801632	2.1047e+08	255214688	215242720	209858672	202369920	214057536	210820096	243068480	240581584	264688592	256640896	271093888	222201648	226096128	227438400	223530624	226922000	229689728	0.012893		M+H	10.3284	810.659
Lipidomics	Sphingomyelin	SM(24:3)	0.879334	0.1533	4.31962e+06	3.79839e+06	4.21888e+06	4713495	4887770	3807553	3.97039e+06	3.35876e+06	3129205	3.83983e+06	4533559	4.13059e+06	3.75179e+06	3.09869e+06	4104437	2.46837e+06	4.51642e+06	3804347	0.184892		M+H	10.2084	808.644
Lipidomics	Sphingomyelin	SM(25:0)	0.948441	0.311386	2.40648e+07	2.28241e+07	26731534	24926540	23352488	21701024	23612630	23460202	21879942	20583090	22951934	25245266	21726212	23137526	22355512	23429938	21755268	20645382	0.0422499		M+H	10.718	828.708
Lipidomics	Sphingomyelin	SM(25:1)	3.36893	5.57734e-08	9.39643e+07	3.16559e+08	100413504	93553672	91916472	89843656	94094272	305799136	318840608	327613920	306232864	324308416	195469808	199152320	197464000	205065552	212519952	206223328	0.0378528		M+H	10.5655	826.692
Lipidomics	Sphingomyelin	SM(25:2)	2.29952	8.75791e-05	5.22082e+06	12005391	4947648	5628800	5054108	5028716	5.44484e+06	10755521	11186414	12358487	12080597	13645936	8171769	8.36131e+06	8085530	8186531	9543110	8416272	0.0608783		M+H	10.4192	824.675
Lipidomics	Sphingomyelin	SM(26:0)	0.650526	6.0399e-06	5.80022e+06	3.7732e+06	6278306	5.91774e+06	5529205	5746277	5529585	4.02112e+06	3.93394e+06	3.26416e+06	3.86355e+06	3.78321e+06	4.06399e+06	3.31265e+06	4.40549e+06	4974147	4.84607e+06	4042704	0.129989		M+H	10.8075	842.722
Lipidomics	Sphingomyelin	SM(26:1)	1.2179	0.000133621	5.30533e+07	6.46137e+07	56177552	54203328	53594040	48898908	52392596	62267116	63586008	67270328	62296440	67648792	55255000	57206772	56145536	55004364	57029940	55204528	0.0326107		M+H	10.6428	840.707
Lipidomics	Sphingomyelin	SM(26:2)	0.852748	0.0291812	18336544	15636452	19708978	18536586	17669982	18044194	17722980	14855424	16349126	13518878	14962588	18496244	15806072	18184062	17006550	15709601	16598532	16709904	0.0510541		M+H	10.5029	838.69
Lipidomics	Sulfatide-Hex Ganglioside	Sulfatide(Hex/14:0)	0.347024	5.14856e-08	4.51968e+06	1.56844e+06	4814494	4.26734e+06	4729466	4.31295e+06	4.47414e+06	1.71256e+06	1541954	1.57292e+06	1.81678e+06	1.19796e+06	2882617	3054455	3020510	3197854	3307795	3.23911e+06	0.0482289		M-H	8.78071	751.488
Lipidomics	Sulfatide-Hex Ganglioside	Sulfatide(Hex/16:0)	0.290404	1.47415e-08	650096818	1.88791e+08	653530620	642320580	627487870	643604990	683540030	183367872	198105728	173694032	195910944	192876192	415687872	417442496	433516736	431965952	427509376	443139968	0.0245673		M-H	9.00866	779.519
Lipidomics	Sulfatide-Hex Ganglioside	Sulfatide(Hex/16:1)	0.491328	2.01237e-05	8.86308e+06	4.35468e+06	9587236	8890721	8825871	9003609	8.00798e+06	4704440	4495082	2.96538e+06	5.18467e+06	4.42381e+06	6.16124e+06	6.42017e+06	5789866	6014451	6419013	6624262	0.0467759		M-H	8.86173	777.503
Lipidomics	Sulfatide-Hex Ganglioside	Sulfatide(Hex/17:0)	0.38242	0.000125983	9.47289e+06	3.62262e+06	9507173	10090260	9613512	7674834	10478647	3.68352e+06	3324469	3273361	3940898	3.89083e+06	8124030	7614139	7763911	6.93572e+06	7555410	7.18827e+06	0.273103		M-H	9.06317	793.534
Lipidomics	Sulfatide-Hex Ganglioside	Sulfatide(Hex/18:0)	0.322967	4.76016e-06	1783186432	575909646	1628925180	1922669060	1885431300	1718226940	1760679680	614921860	625497730	527508800	553757120	557862720	1336090620	1405453570	1258282880	1246516100	1172800900	1291906050	0.0661272		M-H	9.14632	807.551
Lipidomics	Sulfatide-Hex Ganglioside	Sulfatide(Hex/18:1)	0.410366	6.97787e-05	688274674	2.82445e+08	791845310	694239940	683196860	559394110	712697150	312063968	254202912	220310256	300643616	325002112	573647360	497149440	546008580	512029472	562161730	498970304	0.0571701		M-H	9.04786	805.536
Lipidomics	Sulfatide-Hex Ganglioside	Sulfatide(Hex/20:0)	0.86685	0.0747643	769873420	667364606	777983940	822135550	804861120	750245820	694140670	745877630	673465660	575469630	773111170	568898940	833219710	813936580	744768130	749277760	747742910	757111870	0.0457855		M-H	9.48818	835.582
Lipidomics	Sulfatide-Hex Ganglioside	Sulfatide(Hex/20:1)	0.974049	0.92537	1.08233e+06	1.05424e+06	860194	954737	877482	1.36111e+06	1.35812e+06	574976	819422	2.07375e+06	838078	964979	1.23327e+06	1.20755e+06	1288236	891894	834748	1.41159e+06	0.195161		M-H	9.28766	833.566
Lipidomics	Sulfatide-Hex Ganglioside	Sulfatide(Hex/21:0)	4.1971	0.00171476	19549984	8.20532e+07	16395422	22479372	22461056	20975612	15438458	96852784	87716808	58173328	102482952	65040152	57017256	56181548	50313068	48904064	43626488	46065024	0.110722		M-H	9.56234	849.597
Lipidomics	Sulfatide-Hex Ganglioside	Sulfatide(Hex/21:1)	7.67499	2.44713e-05	9.3231e+06	7.15547e+07	10112795	10737196	7.95845e+06	9184714	8622359	69945720	76589496	73854184	77014048	60370228	40189100	41453892	41911200	44194068	45749688	42921612	0.0462973		M-H	9.40236	847.582
Lipidomics	Sulfatide-Hex Ganglioside	Sulfatide(Hex/22:0)	0.58329	0.000396569	2.44098e+08	1.4238e+08	243546416	245574400	272364544	235337264	223669440	160441184	144368896	110925632	180518672	115646680	205783376	196942752	189940592	190087440	196624208	198789104	0.0292629		M-H	9.72566	863.614
Lipidomics	Sulfatide-Hex Ganglioside	Sulfatide(Hex/22:1)	1.47943	6.64614e-05	7776010320	11504062260	8124323800	7884967900	7528470500	7593583600	7748705800	11918731300	11967583200	11238628400	11925777400	10469591000	10599164900	10474014700	10121218000	10035893200	10088369200	9869070300	0.0260903		M-H	9.50974	861.597
Lipidomics	Sulfatide-Hex Ganglioside	Sulfatide(Hex/23:1)	5.02902	0.000491792	4.36887e+08	2197113268	434083712	416485824	502802944	388033984	443029632	2686310400	2294099200	1794076290	2405347070	1805733380	1566275070	1416544130	1219530240	1233520260	1198941060	1095637760	0.13973		M-H	9.5548	875.614
Lipidomics	Sulfatide-Hex Ganglioside	Sulfatide(Hex/23:2)	7.20016	1.93616e-05	2.88385e+07	2.07642e+08	29524510	29599182	28943986	27023490	29101576	216647632	219313872	180926480	221573488	199749664	109173840	110501840	110097960	116862344	113104832	112312168	0.0227377		M-H	9.41761	873.597
Lipidomics	Sulfatide-Hex Ganglioside	Sulfatide(Hex/24:0)	0.557661	0.00299231	3.43857e+07	1.91756e+07	35539988	36109352	34319244	35993048	29966694	15083063	21854758	13541592	28571782	16826612	34545324	33611276	34551336	32477436	35474680	36852544	0.0685434		M-H	9.97033	891.645
Lipidomics	Sulfatide-Hex Ganglioside	Sulfatide(Hex/24:1)	1.55605	0.000146686	5259254360	8183670980	5395406800	5319582700	5310231600	5029902800	5241147900	8955088900	8040628700	7446340100	8269518300	8206778900	7416763400	7160215600	6876412400	6703865900	6776014300	6598810100	0.0482106		M-H	9.74497	889.628
Lipidomics	Sulfatide-Hex Ganglioside	Sulfatide(Hex/24:2)	2.2327	2.20694e-05	7598199500	16964498440	7929423900	7334604800	8028486700	7049102300	7649379800	18077585400	16934940700	14972884000	17958596600	16878485500	13020961800	12881264600	12183133200	12128194600	12181153800	12065945600	0.035653		M-H	9.5453	887.613
Lipidomics	Sulfatide-Hex Ganglioside	Sulfatide(Hex/24:3)	0.541338	8.55747e-06	72959856	3.94959e+07	81023576	74872344	69944680	70110664	68848016	35738136	37996768	43650160	39932956	40161592	52204024	49922972	51719244	57593224	56335124	55865872	0.0646258		M-H	9.43536	885.597
Lipidomics	Sulfatide-Hex Ganglioside	Sulfatide(Hex/25:1)	6.7385	9.97324e-05	4.63723e+06	3.1248e+07	4.81511e+06	4782368	4414061	3.99976e+06	5174874	33272030	33477348	24237386	33274538	31978712	18810578	18317048	17896300	17577742	17736614	17730620	0.0291897		M-H	9.8816	903.644
Lipidomics	Sulfatide-Hex Ganglioside	Sulfatide(Hex/25:2)	6.21716	8.39494e-06	1.16e+07	7.2119e+07	12490245	11536531	11578297	11104335	11290506	67573968	71704464	68885272	72292544	80138760	41737124	43331024	42933320	42567260	45972936	45554624	0.0400413		M-H	9.70535	901.627
GC/MS	TCA cycle	Malic acid	0.817441	0.00731618	163367	133543	167459	149013	149847	184107	166407	120545	132348	138110	149637	127073	70726	88649	91643	119312	122420	122102	0.214417
GC/MS	TCA cycle	Citric acid	0.876595	0.00991675	49938	43775.4	50297	48340	45762	53719	51572	40935	45156	46970	44906	40910	24449	28946	29189	37405	38073	37896	0.206679
GC/MS	TCA cycle	Succinic acid	0.8346	0.0549127	498229	415822	517199	506751	399885	573880	493429	348017	415368	457475	474159	384089	239313	306631	296425	289470	289681	402747	0.163796
GC/MS	TCA cycle	Fumaric acid	0.857045	0.0965294	316604	271344	359114	315873	272159	364784	271090	257941	279440	301845	282008	235486	191453	224755	230387	203346	204467	305631	0.163684
Lipidomics	Triacylglycerol(acyl)	TG(aaa-48:0)	0.939002	0.320472	8.22369e+06	7.72206e+06	7913342	7455557	8812841	8672599	8264132	7741144	9059103	6.87685e+06	7969675	6963544	11337388	9317344	8804177	8650886	8581312	10881873	0.130454		M+NH4	11.4187	806.734
Lipidomics	Triacylglycerol(acyl)	TG(aaa-48:1)	1.12474	0.0896499	3.02504e+07	3.40239e+07	26777104	31971312	29880300	30835148	31788382	35101720	37232192	28101752	33169492	36514540	33050148	34630856	32958098	34745076	33869180	33398114	0.0374417		M+NH4	11.351	804.721
Lipidomics	Triacylglycerol(acyl)	TG(aaa-48:2)	1.10797	0.29196	1.123e+07	1.24426e+07	9609391	13732423	11406509	11097763	10303981	13361920	12692424	9781811	11749802	14626885	13794534	14344496	13502345	13540791	13322860	13827705	0.0316862		M+NH4	11.2699	802.705
Lipidomics	Triacylglycerol(acyl)	TG(aaa-48:3)	0.824574	0.245703	3.08522e+06	2.544e+06	2.75596e+06	3.66882e+06	2.94723e+06	3506504	2.5476e+06	3.26661e+06	1940243	1.71643e+06	2.24964e+06	3.54706e+06	3.80316e+06	3.83458e+06	3.22334e+06	3.54828e+06	3.58786e+06	3.40986e+06	0.0607098		M+NH4	11.1871	800.689
Lipidomics	Triacylglycerol(acyl)	TG(aaa-50:1)	0.909683	0.25417	1.54159e+08	1.40236e+08	148817712	167981648	160107888	148445952	145444144	159436656	161184592	106828272	142863344	130868080	148209472	137479104	146038160	135140592	150768032	151654480	0.0558727		M+NH4	11.4249	832.75
Lipidomics	Triacylglycerol(acyl)	TG(aaa-50:2)	0.986851	0.862644	8.31673e+07	8.20737e+07	77788448	93254192	84954400	76991352	82847864	96709512	88577400	65041852	77933216	82106376	85179248	87076648	80504440	83153432	87408200	85229496	0.0412049		M+NH4	11.3721	830.737
Lipidomics	Triacylglycerol(acyl)	TG(aaa-50:3)	0.99227	0.956238	2.4611e+07	24420718	21202256	31690968	25108626	24464552	20588416	33589220	22824860	17209788	22283436	26196286	25084166	25674322	25518176	24979124	24462232	23847676	0.0342548		M+NH4	11.2855	828.719
Lipidomics	Triacylglycerol(acyl)	TG(aaa-50:4)	0.816872	0.151204	7.57162e+06	6.18505e+06	6.94769e+06	9529767	7501171	6756684	7122781	8516644	5.83446e+06	4267387	5599555	6.70719e+06	6.51875e+06	6493939	6.59024e+06	6150487	6.99004e+06	6.99454e+06	0.0635419		M+NH4	11.2126	826.704
Lipidomics	Triacylglycerol(acyl)	TG(aaa-51:1)	0.652019	0.0189872	2.89201e+06	1.88565e+06	2.53479e+06	3504283	2.90535e+06	2.7579e+06	2.75775e+06	2821180	2.0817e+06	1.19718e+06	1.47162e+06	1.85656e+06	3.07575e+06	3.14592e+06	3.13672e+06	3.06123e+06	3.0605e+06	3.03564e+06	0.0190041		M+NH4	11.4815	846.768
Lipidomics	Triacylglycerol(acyl)	TG(aaa-51:2)	1.29538	0.173989	3.87122e+06	5.01471e+06	4.11568e+06	5.6833e+06	4.28323e+06	2.71782e+06	2556079	6.72279e+06	5348358	3.64487e+06	4624366	4733151	4.63123e+06	4909447	6.03438e+06	4.87064e+06	5124886	4.97518e+06	0.091174		M+NH4	11.4127	844.752
Lipidomics	Triacylglycerol(acyl)	TG(aaa-51:3)	0.956087	0.84949	1.56589e+06	1.49712e+06	1587686	1.13173e+06	1827549	1.73077e+06	1.5517e+06	2.51079e+06	1.93046e+06	1.27926e+06	697160	1.06794e+06	1712482	1.65132e+06	1792628	1962174	1.88979e+06	1.99031e+06	0.0873324		M+NH4	11.3407	842.736
Lipidomics	Triacylglycerol(acyl)	TG(aaa-51:4)	0.547183	0.0350643	779961	426781	689649	1.03237e+06	391396	794601	991790	509402	437376	442776	284604	459749	880850	450723	629087	534635	467736	905039	0.295299		M+NH4	11.2681	840.721
Lipidomics	Triacylglycerol(acyl)	TG(aaa-52:1)	0.756191	0.0266643	3.86337e+07	2.92145e+07	35996252	36207844	43902496	37173368	39888636	36198016	35611748	21953766	27390712	24918042	41105252	33826380	32765150	31918866	39472044	39554760	0.123638		M+NH4	11.5281	860.783
Lipidomics	Triacylglycerol(acyl)	TG(aaa-52:2)	1.16431	0.202666	2.06371e+08	2.40281e+08	197737808	225558816	201127632	192228752	215203360	292582848	279228512	169540896	240675888	219375360	210122368	221532848	213604384	210727664	202272592	207075328	0.0300417		M+NH4	11.4578	858.768
Lipidomics	Triacylglycerol(acyl)	TG(aaa-52:3)	1.00502	0.964948	1.13776e+08	1.14347e+08	106922896	142096352	111186472	102456736	106217888	150474464	119174480	89076000	103642032	109367408	106065032	109858304	113786168	110355520	110158392	105905216	0.0251409		M+NH4	11.3873	856.751
Lipidomics	Triacylglycerol(acyl)	TG(aaa-52:4)	0.803645	0.0465827	1.26822e+08	1.0192e+08	116784040	143885712	125834280	127527888	120077344	131864040	100067920	77755408	94083384	105827856	112991136	117132528	106864704	107789992	116050976	112993312	0.0444629		M+NH4	11.3162	854.736
Lipidomics	Triacylglycerol(acyl)	TG(aaa-52:5)	0.954508	0.706122	2.44344e+07	23322792	20964948	30474610	24538456	24344552	21849296	30986258	23009242	16523906	22713450	23381104	24008976	25487452	22721648	23731474	24880236	22831930	0.0559748		M+NH4	11.237	852.719
Lipidomics	Triacylglycerol(acyl)	TG(aaa-52:6)	0.831181	0.0462015	2.80347e+07	2.33019e+07	25909312	30489724	27407068	26891494	29475828	24492996	24246020	16677542	25879480	25213416	24363136	25209894	24720170	25057014	25717776	24463624	0.0326796		M+NH4	11.1767	850.704
Lipidomics	Triacylglycerol(acyl)	TG(aaa-52:7)	0.896187	0.22564	4.05627e+06	3.63518e+06	4119641	4.47094e+06	4.00014e+06	3.99445e+06	3696181	4095306	4.08428e+06	2561081	3797868	3.63735e+06	3.71993e+06	3.54164e+06	4736524	3590425	3656038	3.34633e+06	0.120418		M+NH4	11.1182	848.688
Lipidomics	Triacylglycerol(acyl)	TG(aaa-52:8)	0.942753	0.401741	3.72057e+06	3.50758e+06	3.82947e+06	3861781	3715771	3722558	3473269	3.7432e+06	3236707	4.26275e+06	3247919	3.04733e+06	3.00676e+06	2.9529e+06	3.2889e+06	3.46524e+06	3.16806e+06	2864164	0.0708997		M+NH4	11.0557	846.674
Lipidomics	Triacylglycerol(acyl)	TG(aaa-52:9)	0.758342	0.291197	814858	617941	926858	923811	920795	468229	834594	440632	377919	1.18292e+06	625682	462549	410901	684976	570270	389345	426956	435494	0.250441		M+NH4	10.9852	844.658
Lipidomics	Triacylglycerol(acyl)	TG(aaa-53:3)	1.39536	0.160667	1.28309e+06	1.79037e+06	920011	2.00871e+06	1.70099e+06	1.05924e+06	726499	2658247	1.61338e+06	1.58986e+06	1.61522e+06	1.47513e+06	1.88292e+06	1.12404e+06	2.02969e+06	1.36859e+06	2.09709e+06	2.17481e+06	0.261534		M+NH4	11.4293	870.767
Lipidomics	Triacylglycerol(acyl)	TG(aaa-53:6)	0.7406	0.0618386	2.74174e+06	2.03053e+06	2.64306e+06	3.04395e+06	3.07962e+06	1.69816e+06	3.24391e+06	2.28775e+06	2.04958e+06	1.91975e+06	1.93051e+06	1.96506e+06	1.90914e+06	1.92635e+06	2.24359e+06	2.39062e+06	1941448	1.64152e+06	0.127751		M+NH4	11.2352	864.72
Lipidomics	Triacylglycerol(acyl)	TG(aaa-53:10)	1.04474	0.878925	474608	495841	737835	620400	507544	237747	269514	528842	263083	380889	484815	821578	342994	376142	472606	356590	396212	429869	0.119534		M+NH4	11.3317	856.658
Lipidomics	Triacylglycerol(acyl)	TG(aaa-54:1)	1.041	0.741864	1.18211e+06	1.23057e+06	848552	1095031	1.38535e+06	1.40694e+06	1.17468e+06	1.32935e+06	1.53156e+06	1.03987e+06	994741	1.25732e+06	1.01661e+06	1.33863e+06	1091598	1509571	1.06905e+06	1.06458e+06	0.151955		M+NH4	11.6106	888.816
Lipidomics	Triacylglycerol(acyl)	TG(aaa-54:2)	1.34721	0.0714111	3.31431e+07	4.46506e+07	33868308	36272040	35611664	28799966	31163744	56133100	51886532	28368190	43302292	43563024	38579448	34844080	38115372	34572352	39280196	39428364	0.0705686		M+NH4	11.5358	886.799
Lipidomics	Triacylglycerol(acyl)	TG(aaa-54:3)	1.19233	0.248059	5.64242e+07	6.72765e+07	59750664	58461328	61871624	52368400	49668836	91633008	73723616	43269096	61323392	66433324	63355208	58039260	57880364	53412004	63465672	65182440	0.0857389		M+NH4	11.4689	884.781
Lipidomics	Triacylglycerol(acyl)	TG(aaa-54:4)	0.886398	0.326377	1.70187e+08	1.50853e+08	163422688	182292272	168974560	165415248	170828416	205979200	158974576	98812576	143431376	147067680	158629792	153704256	154291120	151096784	156951920	152271984	0.0304011		M+NH4	11.4029	882.765
Lipidomics	Triacylglycerol(acyl)	TG(aaa-54:5)	0.938069	0.559442	1.92688e+08	180754304	186968368	212353440	196985200	176983200	190148096	234656784	192750112	121751584	174757040	179856000	177362320	177278432	182666240	177762384	182367360	177943040	0.019093		M+NH4	11.3343	880.749
Lipidomics	Triacylglycerol(acyl)	TG(aaa-54:6)	0.7686	0.00766565	4.56595e+08	350939024	446432032	476825216	445219392	440297696	474201056	381811520	359158944	261368240	364849664	387506752	387749248	406774272	383779936	381617792	397662080	389724192	0.0310888		M+NH4	11.2711	878.734
Lipidomics	Triacylglycerol(acyl)	TG(aaa-54:7)	1.00763	0.91763	79596208	8.02038e+07	74477120	84166008	86543048	76266592	76528272	88224992	79570008	60907896	84128824	88187248	77971600	78332584	75617616	73001904	85362336	82308648	0.0591898		M+NH4	11.215	876.719
Lipidomics	Triacylglycerol(acyl)	TG(aaa-54:8)	0.858187	0.109637	7.40814e+06	6357563	6218114	8827307	7099506	7722748	7173004	7526058	6626990	5100298	6480364	6054105	7099138	6.43693e+06	6.13797e+06	6.11575e+06	5.88389e+06	6258609	0.0614503		M+NH4	11.1526	874.704
Lipidomics	Triacylglycerol(acyl)	TG(aaa-54:9)	0.663174	0.0169702	2.32913e+06	1.54462e+06	1.66238e+06	2.79885e+06	2415921	2311965	2456547	1.59859e+06	2.00023e+06	976254	1.30988e+06	1.83815e+06	1.73673e+06	1645610	2.17146e+06	1.98123e+06	2.22846e+06	1757201	0.132139		M+NH4	11.0862	872.688
Lipidomics	Triacylglycerol(acyl)	TG(aaa-55:4)	0.824637	0.207593	1.2559e+06	1.03567e+06	1.50021e+06	1.18777e+06	1.32746e+06	1.25149e+06	1.01259e+06	1.36473e+06	1.02449e+06	582955	954206	1251944	1.43759e+06	1157043	777825	1.38837e+06	1.14827e+06	1.1429e+06	0.269119		M+NH4	11.4421	896.782
Lipidomics	Triacylglycerol(acyl)	TG(aaa-55:5)	0.896691	0.60903	1.64893e+06	1.47858e+06	2.05546e+06	1.926e+06	1.25368e+06	1.76208e+06	1.24744e+06	1.92823e+06	1.83784e+06	480094	1.79681e+06	1.34993e+06	1.20391e+06	1.04403e+06	1415933	1.25469e+06	1.54558e+06	723222	0.272605		M+NH4	11.3807	894.766
Lipidomics	Triacylglycerol(acyl)	TG(aaa-55:6)	0.619375	0.000232713	5.1241e+06	3.17374e+06	5168414	5368522	5102950	4849522	5131093	3.36229e+06	3.33563e+06	2.36747e+06	3.50472e+06	3.29859e+06	3.61846e+06	3.76739e+06	4016768	4.02651e+06	3485418	3.57572e+06	0.0590883		M+NH4	11.3385	892.75
Lipidomics	Triacylglycerol(acyl)	TG(aaa-55:7)	0.801766	0.0630061	5.10006e+06	4.08905e+06	5592929	5433721	4.62278e+06	4417402	5433458	5197020	4.31343e+06	2.7892e+06	4060027	4085581	3.73075e+06	4.07853e+06	4.04815e+06	5.03676e+06	4.57013e+06	4605406	0.123159		M+NH4	11.2819	890.735
Lipidomics	Triacylglycerol(acyl)	TG(aaa-56:1)	1.15749	0.471949	345036	399377	265739	306255	333384	444109	375694	432745	582041	183635	401144	397323	420664	477772	381764	346292	477646	500715	0.148923		M+NH4	11.6316	916.842
Lipidomics	Triacylglycerol(acyl)	TG(aaa-56:2)	1.19569	0.128473	2.28352e+06	2.73038e+06	2.194e+06	2.24062e+06	2463306	2.23814e+06	2.28156e+06	3.1321e+06	3.27838e+06	1.98656e+06	2463193	2.79166e+06	2337735	2.46527e+06	2209615	1.32105e+06	1.35048e+06	1.31373e+06	0.286345		M+NH4	11.6133	914.831
Lipidomics	Triacylglycerol(acyl)	TG(aaa-56:3)	1.36667	0.0750101	5.18832e+06	7.09071e+06	4610385	6283480	5216917	4765534	5065298	9024410	8522344	4515456	6.57576e+06	6815592	5412610	6098909	5205214	5.78079e+06	5.40263e+06	5525177	0.0601074		M+NH4	11.5444	912.815
Lipidomics	Triacylglycerol(acyl)	TG(aaa-56:4)	0.877189	0.247034	4.38318e+07	38448806	39346244	49411864	44173800	40501264	45725992	45586256	44940236	24764658	37248228	39704652	37653224	38844672	38050972	37923620	37001216	36958948	0.0361053		M+NH4	11.4857	910.797
Lipidomics	Triacylglycerol(acyl)	TG(aaa-56:5)	0.888662	0.31352	1.28382e+08	1.14088e+08	133935424	128099008	138330608	115143824	126402728	136450912	131728520	68339976	118018080	115904840	121361536	109633032	109982488	102564392	125046608	124054504	0.0932407		M+NH4	11.4276	908.78
Lipidomics	Triacylglycerol(acyl)	TG(aaa-56:6)	0.680179	0.00789604	7.36406e+07	5.00888e+07	81936816	80177176	75064712	61926332	69098152	56326612	49617944	31515394	49611128	63373060	59626984	54081500	62107572	49695860	62404584	65769772	0.102298		M+NH4	11.4437	906.767
Lipidomics	Triacylglycerol(acyl)	TG(aaa-56:7)	0.946993	0.514681	609398106	5.77096e+08	575818370	653101630	595975170	573591940	648503420	667621060	630340740	417253248	591648960	578613630	551257860	600532990	569025980	583888580	552660860	543202050	0.0362088		M+NH4	11.3317	904.75
Lipidomics	Triacylglycerol(acyl)	TG(aaa-56:8)	0.850423	0.0521446	1.69816e+08	1.44416e+08	167464112	193107616	167809680	153058960	167640848	169629984	147982736	114530872	148616800	141317984	148398464	152367776	152489952	149737264	147769392	146452720	0.0210462		M+NH4	11.2698	902.734
Lipidomics	Triacylglycerol(acyl)	TG(aaa-56:9)	0.751108	0.00326579	1.77973e+07	13367661	16361432	20172860	19178234	16955178	16318599	15368771	12628627	11466424	14656094	12718389	15179222	15230242	15086422	15738802	15348556	16314712	0.0371316		M+NH4	11.1917	900.72
Lipidomics	Triacylglycerol(acyl)	TG(aaa-56:10)	0.717537	0.00297167	4.77246e+06	3.42442e+06	4412734	5207420	4992615	4.67553e+06	4574001	3.80724e+06	3.23859e+06	2.52455e+06	3.88431e+06	3.66739e+06	4344065	4092806	3869748	3.94525e+06	4.39541e+06	4622635	0.0756187		M+NH4	11.1195	898.705
Lipidomics	Triacylglycerol(acyl)	TG(aaa-56:11)	0.559395	0.00618752	740453	414206	594519	546423	857561	821719	882046	408471	369582	303405	535560	454011	825861	498020	512769	445523	785165	626403	0.268392		M+NH4	11.07	896.689
Lipidomics	Triacylglycerol(acyl)	TG(aaa-57:7)	0.981589	0.869989	3.44477e+06	3.38135e+06	3816233	3.97162e+06	3235266	2881500	3.31925e+06	4.13769e+06	3356241	2.25826e+06	3.37708e+06	3777490	2.92973e+06	3.50134e+06	2.97137e+06	3488031	3.28258e+06	3580977	0.0856909		M+NH4	11.3778	918.767
Lipidomics	Triacylglycerol(acyl)	TG(aaa-57:11)	1.04996	0.477768	685053	719280	707029	681925	555038	746645	734629	705274	688971	839581	687104	675470	731483	537959	584746	650818	563632	561626	0.129699		M+NH4	11.101	910.705
Lipidomics	Triacylglycerol(acyl)	TG(aaa-58:4)	1.06916	0.709133	1980921	2.11792e+06	1.33897e+06	2145708	2.364e+06	1.78418e+06	2.27174e+06	2495170	2.65534e+06	972613	2.2396e+06	2226880	2.19343e+06	2.03976e+06	1.30619e+06	2336518	2.19523e+06	1.26321e+06	0.231558		M+NH4	11.5589	938.83
Lipidomics	Triacylglycerol(acyl)	TG(aaa-58:5)	1.20308	0.176921	9425985	1.13402e+07	8691272	9291636	10590551	8641299	9915167	13065859	13817980	7.17381e+06	11109983	11533390	9740238	11373101	9724007	10182222	9118371	9149792	0.0905327		M+NH4	11.5074	936.813
Lipidomics	Triacylglycerol(acyl)	TG(aaa-58:6)	0.947451	0.589154	2.20694e+07	2.09097e+07	21938386	22906014	21540428	20717310	23244836	22934268	24109584	13326162	22691584	21486700	19893660	21607154	20085386	20199366	18734516	19691144	0.0424076		M+NH4	11.4678	934.798
Lipidomics	Triacylglycerol(acyl)	TG(aaa-58:7)	0.982717	0.861715	7.53126e+07	7.40109e+07	76355312	79962712	78238064	66230064	75776640	83685856	82158864	47747956	80300640	76161208	69453400	67698960	72142088	68206512	68921056	68536736	0.0297526		M+NH4	11.4013	932.779
Lipidomics	Triacylglycerol(acyl)	TG(aaa-58:8)	0.959032	0.608285	74277376	7.12344e+07	72109184	73140984	76625760	71501464	78009488	81431240	82333400	52943964	72108520	67354768	74090520	72995512	67507000	71176336	72936768	70147016	0.0398765		M+NH4	11.3313	930.763
Lipidomics	Triacylglycerol(acyl)	TG(aaa-58:9)	0.839511	0.0350364	1.04114e+08	8.74045e+07	100858440	112927808	100206408	97206168	109369088	96255504	88323968	66287004	91465296	94690480	89089536	91989120	90620216	90876536	88952120	90343976	0.0321188		M+NH4	11.2851	928.749
Lipidomics	Triacylglycerol(acyl)	TG(aaa-58:10)	0.816813	0.048818	2.09127e+08	1.70817e+08	203547936	213656928	212940064	198916832	216571104	188426384	166721936	119867264	179116544	199953888	189318608	185740928	181840000	180597888	184948832	182260704	0.0279376		M+NH4	11.2245	926.734
Lipidomics	Triacylglycerol(acyl)	TG(aaa-58:11)	0.755407	0.0129319	17918186	1.35355e+07	15118140	17688076	17923938	20803476	18057300	12962284	13462662	10154972	16394341	14703362	15390882	15467934	15244704	15378602	15371580	14630094	0.0283534		M+NH4	11.1646	924.72
Lipidomics	Triacylglycerol(acyl)	TG(aaa-58:12)	0.804805	0.026049	1.41738e+07	1.14072e+07	13444275	15269006	13240377	14297389	14618065	11717432	11750828	8178323	12907648	12481560	11128227	12601916	13102262	12777108	10292376	11044274	0.088564		M+NH4	11.137	922.704
Lipidomics	Triacylglycerol(acyl)	TG(aaa-60:7)	1.11889	0.438221	3.53965e+06	3.9605e+06	3.56041e+06	4078562	3.3957e+06	2.56721e+06	4096397	4864872	4712673	2.51401e+06	4.14568e+06	3.56527e+06	3832248	3.99573e+06	3972105	3.92884e+06	3440270	4.16495e+06	0.0702621		M+NH4	11.4877	960.814
Lipidomics	Triacylglycerol(acyl)	TG(aaa-60:8)	1.06921	0.448715	9374907	1.00238e+07	9806671	9121789	9951939	8425736	9568400	11673868	11040287	7.3375e+06	10126225	9940997	9466665	10309646	8.20881e+06	8747600	9259977	9871347	0.0742677		M+NH4	11.4309	958.797
Lipidomics	Triacylglycerol(acyl)	TG(aaa-60:9)	0.761099	0.0345799	4.05422e+07	30856638	41125548	42051464	43794060	35861056	39879008	34288108	32332268	18894104	31252958	37515752	35688952	29918762	32928456	30462812	36869848	36014948	0.0895955		M+NH4	11.371	956.78
Lipidomics	Triacylglycerol(acyl)	TG(aaa-60:10)	0.709922	0.00644229	2.08928e+08	1.48323e+08	211646464	206704896	225416896	193917536	206955136	164898304	156433536	97996272	154056784	168228592	174932448	173785216	167865776	170003472	180365504	176070112	0.0414002		M+NH4	11.3426	954.767
Lipidomics	Triacylglycerol(acyl)	TG(aaa-60:11)	0.891648	0.297161	4.46895e+07	3.98473e+07	48194744	49376680	47687232	36041104	42147676	46465444	38077060	27348232	40980096	46365592	33978472	37406248	42524624	36054576	37663736	40443184	0.0736519		M+NH4	11.292	952.75
Lipidomics	Triacylglycerol(acyl)	TG(aaa-60:12)	0.826733	0.0559477	4.31626e+08	3.56839e+08	438395872	425363424	453462528	392274048	448633536	381347648	356596480	251500960	373287552	421464384	407808448	383229408	370980736	365577088	433680512	419337440	0.0804209		M+NH4	11.2437	950.735
Lipidomics	Triacylglycerol(acyl)	TG(aaa-60:13)	0.902676	0.193626	2.4713e+07	22307874	21587922	24115972	25031806	27226074	25603444	23571180	22772048	16853474	24395810	23946858	22512124	22444144	23338760	21965208	23325342	22114300	0.0262319		M+NH4	11.1533	948.72
Lipidomics	Triacylglycerol(acyl)	TG(aaa-62:9)	0.753578	0.0674803	925421	697377	1.12364e+06	806878	1.06445e+06	820977	811157	801501	785054	458995	550651	890684	760315	785113	1.03733e+06	795836	998084	897156	0.131073		M+NH4	11.4663	984.815
Lipidomics	Triacylglycerol(acyl)	TG(aaa-62:10)	0.803258	0.0682413	12079364	9.70285e+06	12132673	12442178	12364064	11066956	12390949	10853104	10249481	5.95297e+06	10069129	11389559	10963240	9317494	9629984	9832670	10587766	9853336	0.0609126		M+NH4	11.4148	982.798
Lipidomics	Triacylglycerol(acyl)	TG(aaa-62:11)	0.921938	0.43156	1.26702e+07	1.16812e+07	12418329	13918415	12737506	11139225	13137644	12468068	13320669	7.44252e+06	12651596	12522965	10658949	12390371	12612966	11854394	10635182	11009923	0.0735391		M+NH4	11.3696	980.781
Lipidomics	Triacylglycerol(acyl)	TG(aaa-62:13)	0.975014	0.755575	4.63852e+07	4.52262e+07	45197848	50494220	46856804	40880232	48496832	50544348	49474648	33006006	46068496	47037456	43392048	44225872	43203420	43357472	45171056	43867824	0.0317651		M+NH4	11.2497	976.751
Lipidomics	Triacylglycerol(acyl)	TG(aaa-62:14)	0.747119	0.0109062	11351475	8.48091e+06	10987205	10089200	12611776	11553022	11516172	9179206	9074428	5715511	9572181	8863210	8445805	9113518	9383665	9197794	8571194	9908929	0.0610253		M+NH4	11.1875	974.735
Lipidomics	Triacylglycerol(acyl)	TG(aaa-64:14)	0.796894	0.476421	1.6111e+06	1.28388e+06	632482	1.45177e+06	2062803	1.4749e+06	2.43357e+06	2040561	965104	293143	1.28955e+06	1.83104e+06	2134517	1.71962e+06	1.26015e+06	1.00621e+06	1.96587e+06	1.87415e+06	0.245553		M+NH4	11.2553	1002.77
Lipidomics	Triacylglycerol(acyl)	TG(aaa-64:16)	0.845845	0.166318	13683598	1.15742e+07	12622372	14455880	13888851	12818163	14632724	13343263	12314973	6.78973e+06	11964529	13458494	11180586	11878242	13189634	12290288	11436842	9834805	0.0911987		M+NH4	11.1739	998.736
Lipidomics	Triacylglycerol(acyl)	TG(aaa-66:16)	0.650972	0.0303685	4.08066e+06	2.6564e+06	4.07129e+06	3115848	5135739	3.76648e+06	4313966	2.54918e+06	2.67473e+06	1.4297e+06	2.54957e+06	4.07881e+06	3.37686e+06	4.14106e+06	3.62323e+06	2.06199e+06	3.56699e+06	3.72781e+06	0.189983		M+NH4	11.2488	1026.77
Lipidomics	Triacylglycerol(acyl)	TG(aaa-66:18)	0.82596	0.149742	9.11191e+06	7.52607e+06	8011537	9828312	7848569	9527615	10343498	7523325	8736432	4439325	7713835	9217449	7.99857e+06	8448798	8415516	8.14835e+06	6.47793e+06	6498851	0.111076		M+NH4	11.1589	1022.74
GC/MS	Trp pathway	Tryptophan	0.839412	0.0878913	55200.8	46336.2	51396	45424	67590	56796	54798	44644	42581	39666	51032	53758	37278	42786	45595	51886	54954	56133	0.151079
GC/MS	Tyr pathway	Tyrosine	1.25578	0.0754405	72863.4	91500.2	70871	58042	76174	86290	72940	75698	86499	76521	107615	111168	58772	69172	72570	93109	96449	95556	0.222132
Lipidomics	Ubiquinol	Coenzyme Q4 (Reductive)	0.484628	0.000292383	1.18366e+06	573633	1.00319e+06	1.43311e+06	1.0614e+06	1.16036e+06	1.26022e+06	417721	713928	501189	711257	524069	913701	735112	774921	908816	976014	821072	0.133648		M+NH4	7.54816	456.324
Lipidomics	Ubiquinol	Coenzyme Q8 (Reductive)	0.869731	0.00898156	886615462	771116930	871132220	884150400	889080320	883505600	905208770	753971010	777953220	830406590	808627460	684626370	839974910	856678020	838694660	835700740	812953280	840125380	0.0153836		M+NH4	10.2203	728.572
Lipidomics	Ubiquinol	Coenzyme Q9 (Reductive)	1.1851	0.0253506	938336894	1112026052	887023420	961848830	918822780	929315900	994673540	1150848900	1182624260	905398980	1161603460	1159654660	1051709380	983820220	1023128060	1030381630	1045427010	1017123140	0.0272193		M+NH4	10.8125	796.636
Lipidomics	Ubiquinol	Coenzyme Q10 (Reductive)	0.958397	0.539887	585680244	5.61314e+08	568096770	624408830	563788480	575975620	596131520	623094660	599661500	425702816	563281020	594829500	576470340	568657150	565626620	579633410	562295550	529312000	0.0292419		M+NH4	11.0269	864.698
Lipidomics	Ubiquinones	Coenzyme Q4	0.685969	0.000403492	3.76278e+06	2.58115e+06	4327473	3689935	3.6134e+06	3.48629e+06	3.69678e+06	2.3728e+06	2.41114e+06	2.9104e+06	2.93652e+06	2.27488e+06	2934274	2.98459e+06	3.09984e+06	3054726	3.15672e+06	3.20467e+06	0.0306316		M+NH4	7.37668	454.308
Lipidomics	Ubiquinones	Coenzyme Q6	0.562356	0.000230054	2.43725e+08	1.3706e+08	287627008	222429632	255043520	235418192	218106352	138333696	115982496	167835296	111500680	151649136	180861136	183355504	180384080	179584912	181087504	184329760	0.00934123		M+NH4	9.37958	590.431
Lipidomics	Ubiquinones	Coenzyme Q9	1.07153	0.4573	751600564	805363546	854797440	732896130	730567740	709352900	730388610	748559170	701125310	1048231620	772355970	756545660	631312450	694031870	705726460	678135620	665196670	695853310	0.0369076		M+NH4	10.9772	794.621
Lipidomics	Ubiquinones	Coenzyme Q10	1.08827	0.309693	3.70971e+08	4.03717e+08	413456896	364095360	350390144	356152448	370760064	382440224	364534848	510391776	387512448	373704320	303332064	354032448	344138464	340491840	307726720	322577920	0.0575382		M+NH4	11.1727	862.685

## Sheet: Liver
	Molecule		Statistics		Mean (area)		Young					Aged					mixQC						Molecule information
Platform	Group	Name	Fold change	P-value (Welch's t-test)	young	aged	Liver_51	Liver_53	Liver_55	Liver_57	Liver_59	Liver_52	Liver_54	Liver_56	Liver_58	Liver_60	Liver_QC00	Liver_QC01	Liver_QC02	Liver_QC03	Liver_QC04	Liver_QC05	CV	KEGG/HMDB	Ion	RT	ObsMass
IonPair	Purine pathway	ATP	0.959096	0.820577	1.10946e+07	1.06408e+07	1.17017e+07	1.00108e+07	1.50795e+07	8.99246e+06	9.68882e+06	9.51345e+06	5.90459e+06	1.57742e+07	1.06825e+07	1.13294e+07	9.04009e+06	5.76164e+06	6.55251e+06	1.10779e+07	5.78142e+06	1.02125e+07	0.290296	C00002		0
IonPair	Nicotinate and nicotinamide pathway	NAD+	0.85153	0.0722285	3.03778e+07	2.58676e+07	2.66142e+07	2.87059e+07	3.28003e+07	2.9769e+07	3.39997e+07	2.42163e+07	2.4027e+07	2.20402e+07	2.73295e+07	3.17253e+07	2.60021e+07	2.66098e+07	2.80244e+07	2.65597e+07	2.96881e+07	2.98013e+07	0.0598131	C00003		6.51
IonPair	Nicotinate and nicotinamide pathway	NADP+	1.00714	0.928664	2.40369e+06	2.42084e+06	2.70239e+06	2.1124e+06	2.47044e+06	2.43449e+06	2.29873e+06	2.53803e+06	2.16716e+06	1.9724e+06	2.57147e+06	2.85515e+06	2.48575e+06	2.60534e+06	2.28639e+06	2.77172e+06	2.90946e+06	2.38735e+06	0.0915886	C00006		8.62
IonPair	Purine pathway	ADP	1.1385	0.366668	2.92689e+06	3.33225e+06	2.70496e+06	2.47393e+06	2.50941e+06	3.6764e+06	3.26975e+06	4.13578e+06	3.96516e+06	2.20616e+06	3.35038e+06	3.00379e+06	3.09783e+06	3.22874e+06	3.01541e+06	2.99307e+06	3.05536e+06	3.25667e+06	0.0356379	C00008		8.87
IonPair	Fatty acyl CoAs	CoA	1.02445	0.881111	144497	148031	149702	107245	130269	167816	167455	180939	138460	75758.7	168252	176743	139102	190194	157494	172560	132693	163122	0.133667	C00010		10.13
IonPair	Pyrimidine pathway	UDP	1.19013	0.441141	129618	154263	82395	181662	99343.9	153914	130775	230623	104813	99512.6	178664	157701	122672	163255	142668	147586	137231	209213	0.196522	C00015		8.68
IonPair	Riboflavin pathway	FAD	1.09711	0.421811	2.37372e+06	2.60422e+06	2.35629e+06	2.17995e+06	2.42785e+06	2.16753e+06	2.73697e+06	2.80942e+06	2.51966e+06	1.69911e+06	3.0855e+06	2.90739e+06	2.70367e+06	2.27341e+06	3.84088e+06	2.91696e+06	2.03221e+06	1.88064e+06	0.276351	C00016		9.2
IonPair	Cys/Met pathway	S-Adenosyl-methionine(SAM)	1.08661	0.504593	1.35923e+06	1.47696e+06	1.01116e+06	1.08608e+06	1.41706e+06	1.81376e+06	1.46812e+06	1.4923e+06	1.27091e+06	1.77025e+06	1.38701e+06	1.46433e+06	1.14902e+06	1.34096e+06	1.34648e+06	1.22879e+06	1.24236e+06	1.24281e+06	0.0593753	C00019		0.75
IonPair	Purine pathway	AMP	0.920294	0.120121	9.31366e+07	8.57131e+07	9.62885e+07	8.52599e+07	9.63079e+07	1.03022e+08	8.48052e+07	8.98643e+07	9.19036e+07	8.03238e+07	8.21391e+07	8.43347e+07	1.01855e+08	8.57026e+07	9.22487e+07	9.30102e+07	7.88581e+07	8.4576e+07	0.0901169	C00020		7.22
IonPair	Cys/Met pathway	S-adenosyl-homocysteine	0.452612	0.0504641	3.06491e+06	1.38721e+06	5.20631e+06	2.70005e+06	2.20521e+06	1.70729e+06	3.50567e+06	1.33403e+06	1.42564e+06	969070	1.7636e+06	1.44372e+06	2.26217e+06	2.29097e+06	2.39029e+06	2.02128e+06	2.65628e+06	2.19496e+06	0.0921811	C00021		5.06
IonPair	Fatty acyl CoAs	AcylCoA(C2:0)	0.289224	0.0395577	4.314e+06	1.24771e+06	5.64497e+06	253795	4.46232e+06	5.65733e+06	5.55161e+06	1.35372e+06	541961	1.22311e+06	829331	2.29045e+06	818804	1.30668e+06	1.11759e+06	1.04964e+06	1.282e+06	1.24035e+06	0.162217	C00024		10.2
IonPair	Glucose pathway	UDP-glucose	1.00415	0.976967	8.11141e+06	8.14505e+06	7.13747e+06	5.26631e+06	7.26503e+06	1.08192e+07	1.00691e+07	9.60508e+06	7.44411e+06	7.06494e+06	8.24267e+06	8.36846e+06	8.45585e+06	9.07985e+06	7.28612e+06	9.58611e+06	7.39617e+06	7.20114e+06	0.125263	C00029		8.63
IonPair	Purine pathway	GDP	2.85156	0.00877041	6108.54	17418.9	849.209	5052.15	1999.49	15298.8	7343.03	21411.7	14376.2	12254.7	22102	16949.7	25063.4	23768.6	24642.2	16857.3	16994.6	23654.9	0.175704	C00035		8.86
IonPair	TCA cycle	Oxalacetic acid	0.675806	0.0845553	768559	519397	1.00098e+06	796776	608392	495541	941102	360852	467887	835507	466606	466131	598441	575045	662318	587931	535009	672005	0.0871489	C00036		7.9
IonPair	TCA cycle	Succinic acid	0.918851	0.251008	1.13733e+07	1.04504e+07	1.17192e+07	1.23468e+07	1.21788e+07	9.5726e+06	1.10492e+07	9.92681e+06	9.38724e+06	9.99717e+06	1.25561e+07	1.03846e+07	1.1112e+07	1.16905e+07	1.02951e+07	1.04495e+07	1.21461e+07	9.18987e+06	0.0984881	C00042		7.71
IonPair	Nucleotide sugar pathway	UDP-N-acetyl-glucosamine	1.14253	0.383127	2.84934e+06	3.25545e+06	2.96629e+06	2.03544e+06	2.82706e+06	3.90463e+06	2.51327e+06	4.14574e+06	3.30535e+06	2.23741e+06	3.55526e+06	3.03349e+06	3.71932e+06	2.69191e+06	3.21823e+06	3.24071e+06	2.67009e+06	2.62369e+06	0.145033	C00043		8.62
IonPair	Glutathione pathway	Glutathione, reduced form	1.26141	0.00767787	5.21726e+07	6.58111e+07	4.93488e+07	4.20206e+07	5.65886e+07	5.52378e+07	5.76669e+07	6.73231e+07	6.73011e+07	6.18798e+07	5.91198e+07	7.34319e+07	5.93571e+07	5.93299e+07	6.23919e+07	6.0358e+07	6.31612e+07	6.50956e+07	0.0377206	C00051		6.45
IonPair	Pyrimidine pathway	CMP	0.961544	0.572969	2.71158e+06	2.6073e+06	3.24854e+06	2.41553e+06	2.66853e+06	2.41566e+06	2.80962e+06	2.31972e+06	2.67566e+06	2.56086e+06	2.82437e+06	2.6559e+06	2.25619e+06	2.5968e+06	2.76955e+06	2.6516e+06	2.75252e+06	2.78315e+06	0.0757307	C00055		7.02
IonPair	Vitamine	Thiamine pyrophosphate	1.26147	0.104196	188158	237357	162422	193107	187118	209282	188862	265332	178813	182000	277896	282743	182425	221793	232850	233138	231587	212403	0.0899104	C00068		0
IonPair	Vitamine	Ascorbic acid	1.20982	0.377402	3.11142e+06	3.76426e+06	1.91831e+06	3.38392e+06	3.36607e+06	3.25205e+06	3.63675e+06	3.31693e+06	3.89179e+06	6.06662e+06	2.69548e+06	2.85046e+06	3.37463e+06	3.58592e+06	3.96528e+06	4.17943e+06	4.06507e+06	3.62579e+06	0.0831204	C00072		0
IonPair	Glycolysis	Phosphoenolpyruvic acid	1.03519	0.91214	34077.6	35277	51371.3	25303.2	26650.1	40594	26469.7	34887.4	28760.4	16319.1	69585.7	26832.4	45566.2	50701.2	51171.8	47854.4	57835.5	37405.3	0.140435	C00074		8.86
IonPair	Sugar related	Sucrose	1.07683	0.815138	22626.4	24364.9	27200.4	6799.04	39104.8	27779.1	12248.5	17851.2	22951.6	14452.8	28314.8	38253.8	42501.4	38257.1	26162.6	39131	25480	26354.8	0.236016	C00089		1.13
IonPair	Lipid pathway	Glycerol-3-phosphate	0.790237	0.110257	3.66011e+07	2.89235e+07	4.87792e+07	3.39882e+07	3.28963e+07	3.19819e+07	3.53599e+07	2.03904e+07	2.73937e+07	2.60476e+07	3.71905e+07	3.35955e+07	3.43806e+07	3.33072e+07	3.2695e+07	3.02415e+07	3.12687e+07	3.21817e+07	0.0454408	C00093		7.11
IonPair	Glucose pathway	Glucose-1-phosphate	1.38823	0.137252	205584	285397	117348	120570	230461	295712	263827	292214	282477	253440	393765	205087	266259	242668	313633	249713	306506	323782	0.123751	C00103		7.15
IonPair	Purine pathway	IDP	1.15747	0.350395	488370	565275	475994	425854	437821	475764	626419	739497	648892	338547	568587	530849	490353	507098	468892	542073	468897	433554	0.0767911	C00104		8.84
IonPair	Glycolysis	Dihydroxy-acetone-phosphate	0.810905	0.479846	496813	402868	579762	263479	504296	506712	629817	500641	525760	369249	0	618691	430499	420186	433605	375318	395612	402486	0.0550959	C00111		7.2
IonPair	Pyrimidine pathway	CDP	1.40074	0.242862	11813.9	16548.2	11382	8091.63	5912.29	19550.6	14132.9	17166.6	9144.53	12749.6	17331.6	26348.6	14322.2	12749	19327.7	10609.1	20402.4	14428.1	0.248753	C00112		8.66
IonPair	Gly/Ser/Thr pathway	Choline	0.912423	0.621893	6.8459e+06	6.24636e+06	9.66686e+06	5.43596e+06	6.32743e+06	7.80644e+06	4.99282e+06	5.20682e+06	8.18511e+06	7.42036e+06	6.69001e+06	3.72949e+06	5.84979e+06	7.85701e+06	8.73126e+06	5.9679e+06	6.24378e+06	8.18322e+06	0.176924	C00114		0.73
IonPair	PPP	Ribose-5-phosphate	0.952873	0.612749	347993	331594	320849	302180	439370	334125	343443	309823	350738	360436	372952	264020	360678	308574	302332	356398	336298	260826	0.118147	C00117		7.07
IonPair	Glycolysis	Glyceraldehyde-3-phosphate	0.959335	0.891097	275371	264173	257849	147415	327022	319107	325460	296556	380569	259449	0	384289	278558	244962	244040	224443	235756	252064	0.0740759	C00118		7.18
IonPair	Vitamine	Biotine	2.30715	0.0315229	242841	560271	0	203033	342128	477762	191283	519647	620118	857082	292684	511825	377930	303453	379159	348477	412429	366216	0.100238	C00120		7.48
IonPair	TCA cycle	Fumaric acid	1.08539	0.582274	333998	362520	433526	261120	344223	278777	352345	408871	207501	394688	386003	415536	281544	430454	346581	318007	290727	231816	0.214045	C00122		8.55
IonPair	Glutathione pathway	Glutathione disulfide	1.10234	0.22823	2.32764e+07	2.56586e+07	2.59555e+07	2.57163e+07	2.17785e+07	1.98986e+07	2.3033e+07	2.73928e+07	2.75991e+07	2.14309e+07	2.86389e+07	2.32312e+07	3.11255e+07	2.42227e+07	2.50688e+07	2.84884e+07	2.78162e+07	2.69158e+07	0.0911583	C00127		8.35
IonPair	Purine pathway	IMP	0.786295	0.00620706	2.78959e+07	2.19344e+07	2.97432e+07	2.83336e+07	2.69138e+07	2.68977e+07	2.75911e+07	1.91396e+07	2.24225e+07	2.60373e+07	2.26736e+07	1.93989e+07	2.64252e+07	2.72201e+07	2.8501e+07	2.85524e+07	2.42848e+07	2.74578e+07	0.0586143	C00130		7.14
IonPair	His pathway	Histidine	1.02777	0.852406	6.27997e+06	6.45437e+06	5.79264e+06	5.1767e+06	5.35861e+06	8.65504e+06	6.41686e+06	6.62498e+06	8.28452e+06	6.91942e+06	6.18963e+06	4.25331e+06	5.62435e+06	7.0308e+06	6.59891e+06	6.29944e+06	6.4903e+06	7.82691e+06	0.111257	C00135		0.76
IonPair	Sugar related	Inositol	1.03844	0.825386	616954	640669	912737	518829	640407	617049	395750	763309	446196	711831	570310	711697	645867	509529	680328	534320	777104	707616	0.160532	C00137		0.97
IonPair	TCA cycle	Malic acid	1.3977	0.0256763	3.72283e+06	5.20342e+06	4.09498e+06	3.86786e+06	3.36835e+06	3.56887e+06	3.71411e+06	6.20694e+06	4.02027e+06	6.2349e+06	4.91965e+06	4.63534e+06	3.9521e+06	4.26698e+06	5.00677e+06	3.98084e+06	4.53483e+06	4.51985e+06	0.0909028	C00149		8.17
IonPair	Nicotinate and nicotinamide pathway	Nicotinamide	0.926906	0.734588	333682	309292	499393	190883	441409	282377	254349	194698	305356	397275	377050	272082	320955	258421	329914	338560	357142	350284	0.10914	C00153		4.21
IonPair	Phe pathway	4-Hydroxybenzoic acid	0.961493	0.817276	49708.9	47794.8	43868.7	57668.1	63001	57676.7	26330.3	44222.1	52744.9	41428.5	62496.4	38082.1	69990.8	49386.1	55102	51316.7	44720.7	64426.3	0.17187	C00156		7.29
IonPair	TCA cycle	Citric acid	2.70758	0.00111633	412484	1.11683e+06	509773	377091	438279	348667	388609	1.27181e+06	1.23346e+06	1.06881e+06	763470	1.24661e+06	606562	772481	768468	900729	742018	705218	0.128304	C00158		8.61
IonPair	Cys/Met pathway	S-Methyl-5-thioadenosine	1.0702	0.530817	564412	604037	385033	598413	605695	558796	674125	571222	737318	581697	525556	604390	873868	619145	644141	747241	767621	846596	0.137732	C00170		6.23
IonPair	Sugar related	Cellobiose	1.27337	0.289279	17198.8	21900.3	15294.6	10200.9	15300.9	19994.1	25203.5	23801.1	21251.7	22037	31384	11027.9	23804.7	11901.6	14376	17002.3	20193	11874.2	0.289327	C00185		7.11
IonPair	Purine pathway	Adenosine	0.995527	0.981023	6.25118e+06	6.22321e+06	4.58188e+06	5.57569e+06	7.92799e+06	6.38252e+06	6.7878e+06	6.45754e+06	4.37679e+06	9.40891e+06	3.96049e+06	6.91232e+06	3.08566e+06	2.53976e+06	2.55485e+06	3.27949e+06	3.48281e+06	3.65049e+06	0.150882	C00212		5.08
IonPair	Taurine and hypotaurine pathway	Acetylphosphate	1.04562	0.637104	462422	483517	463166	362305	543912	488713	454013	535566	466490	488237	552469	374822	471281	460335	474768	475065	503890	467184	0.0315317	C00227		7.1
IonPair	Purine pathway	Guanine	0.765445	0.0848654	392413	300371	533828	291727	345122	393339	398051	263069	330895	344550	264540	298800	258576	386818	340268	326222	308516	368456	0.137434	C00242		7.13
IonPair	Taurine and hypotaurine pathway	Taurine	0.831587	0.213828	8.27585e+07	6.88209e+07	8.59855e+07	8.18271e+07	8.14972e+07	8.06306e+07	8.38518e+07	7.12024e+07	7.91858e+07	8.47285e+07	7.68558e+07	3.21319e+07	8.02155e+07	8.04473e+07	7.74077e+07	8.2851e+07	8.27328e+07	7.74085e+07	0.0300842	C00245		1.01
IonPair	Riboflavin pathway	Riboflavin	0.773727	0.236926	114185	88348.3	160463	102312	124569	97760.8	85822.7	80235.9	88597.5	65561.5	146217	61129.8	200512	137599	172563	185239	139415	146428	0.16093	C00255		6.46
IonPair	PPP	Gluconic acid	0.539295	0.00272612	1.58495e+06	854756	1.96175e+06	1.54003e+06	1.26371e+06	1.38363e+06	1.77564e+06	708304	997231	859962	920255	788029	1.26476e+06	1.1972e+06	1.13828e+06	1.23424e+06	1.25346e+06	1.04052e+06	0.0720338	C00257		5.76
IonPair	Glyoxylate and dicarboxylate pathway	Glyceric acid	0.899262	0.602222	26962	24245.9	26245.1	37554.2	30150.7	22711.1	18148.8	23542.4	13329.8	20328.9	35639	28389.3	30276.7	40251.2	30555.2	45955.7	31445.9	18654.7	0.286125	C00258		5.89
IonPair	Purine pathway	Hypoxanthine	0.48666	0.17761	678016	329963	1.46022e+06	383387	792283	335548	418645	217545	418465	471795	294628	247383	463296	541758	502393	558472	524383	584440	0.0808531	C00262		2.36
IonPair	Purine pathway	Inosine	0.923816	0.838327	5.28915e+06	4.88621e+06	1.05839e+07	3.35647e+06	4.80508e+06	4.10128e+06	3.59909e+06	3.01926e+06	5.63223e+06	2.80184e+06	9.90173e+06	3.07597e+06	1.01488e+07	7.71249e+06	9.44542e+06	7.22195e+06	8.0123e+06	7.99895e+06	0.133468	C00294		4.72
IonPair	Arg/Pro pathway	Creatine	0.751058	0.0215174	1.21052e+07	9.09169e+06	1.44051e+07	1.29744e+07	1.13243e+07	1.08091e+07	1.10129e+07	8.88754e+06	9.45374e+06	1.14726e+07	9.1604e+06	6.48418e+06	1.01319e+07	1.07019e+07	1.27718e+07	1.00296e+07	1.0797e+07	1.10192e+07	0.0908892	C00300		1.09
IonPair	Lipid pathway	CDP-choline	0.663707	0.0134394	249758	165766	314525	201476	232924	232078	267785	175113	197214	185322	176821	94357.8	201476	213224	187873	191268	171722	229522	0.102092	C00307		5.72
IonPair	Fatty acyl carnitines	Carnitine	0.681826	0.0173294	1.84441e+07	1.25756e+07	2.38044e+07	1.96623e+07	1.6161e+07	1.6235e+07	1.63576e+07	1.14383e+07	1.25944e+07	1.47148e+07	1.55847e+07	8.54607e+06	1.45704e+07	1.74526e+07	1.69268e+07	1.53135e+07	1.38292e+07	1.69842e+07	0.093701	C00318		0.98
IonPair	Arg/Pro pathway	Citrulline	0.777916	0.216761	734534	571405	1.07881e+06	802794	513529	734555	542981	623841	660190	680113	553291	339592	738377	703857	603812	405533	613049	666080	0.189552	C00327		1.04
IonPair	Glycolysis	Fructose-1,6-bisphosphate	3.30962	0.0454211	135060	446997	19308.3	88797.1	81901.2	213384	271910	264823	704441	617168	115384	533170	188787	271678	222338	252617	266897	309929	0.166837	C00354		8.67
IonPair	Purine pathway	dAMP	0.624932	0.135982	37842.1	23648.7	50068.8	36678.9	53946.9	25565.5	22950.4	17660.8	39744.6	16165.1	35137.3	9535.85	37508.1	37348.8	50970.1	29815.4	31850.1	40804.4	0.197217	C00360		7.34
IonPair	Purine pathway	dGMP	1.07094	0.536587	65989.1	70670.6	79732.4	67007.2	46197.9	67097.8	69910.4	58271.7	65157	66539.3	79781.8	83603.2	57086.9	63972.4	68614.8	79717.6	80117.1	86235	0.153831	C00362		7.16
IonPair	Purine pathway	Uric acid	0.700802	0.0349379	1.98532e+06	1.39131e+06	2.26843e+06	2.02242e+06	2.02746e+06	1.88538e+06	1.7229e+06	982348	1.10854e+06	2.10741e+06	1.40451e+06	1.35376e+06	1.4345e+06	1.47396e+06	1.33204e+06	1.71951e+06	1.41449e+06	1.51052e+06	0.0888624	C00366		5.36
IonPair	Vitamine	Thiamine	0.919522	0.709542	253825	233398	436507	183341	206064	271502	171713	227875	194384	212265	296206	236259	175911	269458	250097	195626	135538	233857	0.239195	C00378		0.81
IonPair	Purine pathway	Xanthine	0.573007	0.188961	576722	330466	1.09819e+06	441975	719423	262677	361349	158117	494503	397849	396140	205722	381597	400425	353419	344254	365629	459049	0.108987	C00385		2.6
IonPair	Purine pathway	Guanosine	0.99878	0.992232	110099	109965	82697.5	124075	127487	125090	91147.4	87239.3	124088	86957.3	126645	124896	93010.2	138494	93496.5	127333	131520	125747	0.168024	C00387		4.92
IonPair	Lys pathway	Pipecolinic acid	1.33742	0.0521452	1.57862e+07	2.11127e+07	1.46572e+07	1.25167e+07	1.63224e+07	1.81512e+07	1.72835e+07	2.02721e+07	2.08851e+07	2.74641e+07	2.17687e+07	1.51737e+07	1.67085e+07	1.94125e+07	2.10761e+07	1.69825e+07	1.76961e+07	2.02807e+07	0.0974032	C00408		1.01
IonPair	N-acetyl-amino acid	N-Acetylornithine	0.795157	0.446245	38483	30600.1	49156.4	26093.3	31694.4	48344.2	37126.8	60878	18258.1	30890.8	32149.2	10824.2	31831.1	47950.2	22403.2	36222.4	31077	38065.3	0.24588	C00437		1.09
IonPair	Nicotinate and nicotinamide pathway	Nicotinamide ribonucleotide	1.05668	0.919518	86006.4	90881.1	231543	111083	41203.3	30602.1	15601	61247.4	49123.8	151021	46796	146218	99618.1	128166	99620.5	99701.9	48350.5	94244.6	0.272264	C00455		1.85
IonPair	Pyrimidine pathway	Cytidine	1.21433	0.602309	45673.7	55463.1	26028	31534.5	55494.2	66707.8	48604	60374.1	97033	72188.9	47719.4	0	34442.5	48121.8	45181.4	49233.1	28727.9	55570.4	0.230327	C00475		1.85
IonPair	Purine pathway	cAMP	0.76532	0.0685268	119147	91185.5	96888	122879	118876	125638	131453	85293.5	123559	110066	72421.8	64586.6	111122	122315	100326	106047	83882.1	72743.5	0.183238	C00575		7.54
IonPair	Arg/Pro pathway	Guanidoacetic acid	0.765333	0.138129	277808	212616	364587	244654	229810	234237	315754	246525	222157	106865	280086	207447	237094	162971	175848	252157	199616	211373	0.166707	C00581		6.34
IonPair	Lipid pathway	Phosphorylcholine	1.09783	0.711046	7.9578e+06	8.73627e+06	1.05445e+07	7.07318e+06	8.39927e+06	8.08722e+06	5.68481e+06	4.99692e+06	1.15317e+07	1.44532e+07	7.00568e+06	5.69392e+06	7.17462e+06	8.13093e+06	8.81597e+06	6.7185e+06	7.33444e+06	8.72814e+06	0.111212	C00588		1.38
IonPair	Lipid pathway	Glycerophosphoryl choline	1.38563	0.149635	1.29202e+07	1.79026e+07	4.74276e+06	1.2386e+07	1.17447e+07	1.79576e+07	1.77698e+07	2.23828e+07	1.37474e+07	1.32314e+07	2.20159e+07	1.81353e+07	1.42428e+07	1.50118e+07	1.45137e+07	1.3605e+07	1.27657e+07	1.52553e+07	0.0649898	C00670		1
IonPair	Gly/Ser/Thr pathway	Betaine	0.863393	0.061362	5.02437e+07	4.33801e+07	5.42819e+07	5.51082e+07	4.8151e+07	4.6317e+07	4.73606e+07	3.96129e+07	4.93079e+07	4.52944e+07	4.70105e+07	3.56747e+07	4.55139e+07	5.1284e+07	4.81855e+07	4.58365e+07	4.46165e+07	5.10577e+07	0.0607709	C00719		1.02
IonPair	Arg/Pro pathway	Creatinine	0.938394	0.589811	622761	584395	557272	532157	686324	659032	679018	599310	573228	670772	710014	368652	508909	738040	501157	660012	597280	661598	0.153103	C00791		1.08
IonPair	Vitamine	4-Pyridoxic acid	0.98625	0.903584	65132.9	64237.3	70392.1	59696.1	71874.1	66837.5	56864.8	78091.9	42898.9	76398.4	64990.9	58806.5	65532.6	62069	53500.5	73692.6	47137.6	68194.8	0.158852	C00847		8.1
IonPair	Vitamine	Pantothenic acid	0.735661	0.142897	185828	136706	145361	164071	164918	180218	274572	178466	139518	130915	168323	66308.8	148725	164071	159820	156286	155569	135160	0.0666996	C00864		7.27
IonPair	Gly/Ser/Thr pathway	Dimethylglycine	0.654924	0.0237669	1.55857e+06	1.02075e+06	2.01828e+06	1.50363e+06	1.13204e+06	1.78865e+06	1.35027e+06	1.02194e+06	1.07773e+06	1.03545e+06	1.12755e+06	841073	1.08574e+06	1.7081e+06	1.29225e+06	1.12117e+06	1.09666e+06	1.75648e+06	0.231335	C01026		1.01
IonPair	Lipid pathway	3-Hydroxybutyric acid	0.736218	0.00122415	4.09443e+07	3.0144e+07	4.26365e+07	4.67492e+07	3.73852e+07	3.80713e+07	3.98794e+07	2.74823e+07	3.40516e+07	2.74829e+07	3.03844e+07	3.13187e+07	3.55202e+07	3.42811e+07	3.41852e+07	3.60263e+07	3.56603e+07	3.48504e+07	0.0217697	C01089		6.68
IonPair	Glucose pathway	Fructose-1-phosphate	1.36856	0.189122	8.18161e+06	1.1197e+07	3.38854e+06	4.50549e+06	1.00611e+07	1.26045e+07	1.03484e+07	1.28081e+07	1.05399e+07	1.04651e+07	1.38927e+07	8.27914e+06	9.70181e+06	9.60466e+06	1.00826e+07	1.12256e+07	1.09164e+07	1.04166e+07	0.0632956	C01094		7.1
IonPair	Trp pathway	Kynurenic acid	0.430606	0.00705975	29894	12872.5	37859.4	32956.4	31968.6	23454	23231.6	14016.9	14897	22766.8	12682	0	28563.5	28567.9	16135	26597.9	13755.4	22923.5	0.282832	C01717		8.3
IonPair	Purine pathway	Xanthosine	0.358254	0.136394	347975	124663	797317	191549	370871	203422	176717	37752.8	66272.5	86706.5	312422	120164	192217	243970	190792	202597	224392	160057	0.143972	C01762		6.16
IonPair	BCAA pathway	Citraconic acid	2.54968	0.000418641	79249.8	202062	69330.8	41399.5	118180	62062.8	105276	206470	202775	220757	143901	236406	131651	111273	177898	135620	133674	184611	0.198319	C02226		8.6
IonPair	Arg/Pro pathway	Creatine phosphate	0.51129	0.00372209	41484.8	21210.8	43355.1	46760	35700.2	30603.4	51005.6	22103.7	28051.1	13602.8	28902.5	13393.7	26125.7	22950.2	21244.9	31455.1	22074.3	21239.8	0.165331	C02305		8.3
IonPair	Fatty acyl carnitines	Acylcarnitine(C2:0)	0.946883	0.334268	3.00268e+07	2.84319e+07	2.60988e+07	3.04998e+07	3.16987e+07	2.9316e+07	3.25209e+07	2.93169e+07	3.0024e+07	2.97436e+07	2.88603e+07	2.42148e+07	2.98066e+07	3.12809e+07	3.03745e+07	2.62739e+07	2.69043e+07	3.26028e+07	0.0840081	C02571		1.14
IonPair	Dicarboxylic acid	2-Hydroxyglutaric acid	0.643042	0.0226656	1.32694e+06	853276	1.5797e+06	1.05353e+06	1.24702e+06	1.07835e+06	1.67608e+06	463098	1.04709e+06	800972	923595	1.03162e+06	1.0645e+06	1.00945e+06	1.11989e+06	1.09505e+06	1.07455e+06	1.09003e+06	0.0349084	C02630		8.16
IonPair	N-acetyl-amino acid	Nε-Acetyllysine	0.855403	0.330658	152692	130613	196790	144754	132639	145187	144087	123945	86893.2	190703	144781	106741	146970	158779	152229	108239	143671	192549	0.180489	C02727		1.14
IonPair	His pathway	Imidazoleacetic acid	1.14499	0.52639	52739.4	60386.2	50499.4	38917.4	45021.3	89756.5	39502.4	56853.2	52213.7	51720	85914.5	55229.6	44562.7	64858	50103.2	43594.1	22068	51400.1	0.304037	C02835		1.1
IonPair	Arg/Pro pathway	Arginosuccinic acid	0.441233	0.195677	671487	296282	1.62853e+06	518467	313627	433702	463110	251040	264125	333210	358304	274734	448478	486061	389664	471488	370668	497317	0.117984	C03406		5.29
IonPair	Trp pathway	Quinolinic acid	1.25177	0.183437	59522.1	74508.1	83848.5	49226.8	78033.1	45982.2	40520.1	70536.8	77037.3	90628	67413.7	66924.9	53133.5	62563	71641.8	67523.4	70070.1	74537.1	0.116141	C03722		8.56
IonPair	Purine pathway	AICAR	2.76345	0.0941746	54194.5	149764	119613	28561.8	43111.1	35484.6	44202	284816	41094.4	206729	132613	83566.5	104438	149440	126665	110507	126387	113891	0.132297	C04677		7.1
IonPair	Bile acid pathway	Taurodeoxycholic acid	0.55796	0.00710999	201539	112451	234897	169267	238285	225268	139978	100640	84160.1	102961	146132	128360	160664	126664	140229	134395	155963	128382	0.101237	C05463		11.75
IonPair	Purine pathway	GMP	0.865505	0.0556451	2.7061e+07	2.34214e+07	2.68139e+07	2.54582e+07	2.90841e+07	2.71919e+07	2.67569e+07	1.99066e+07	2.50673e+07	2.77299e+07	2.30311e+07	2.13724e+07	2.16887e+07	3.00675e+07	2.37587e+07	2.2995e+07	2.50436e+07	2.69593e+07	0.120916	C06193		7.1
IonPair	Bile acid	Cholic acid	8.90417	0.00833247	2835.85	25250.9	0	832.952	3434.07	6512.67	3399.58	19424.6	16572.4	28874.9	18759.6	42623.1	6314.71	10579.6	8177.13	13578	13583.4	10381.2	0.277362	HMDB00619		11.67
IonPair	BCAA pathway	Hydroxyisocaproic acid	0.560824	0.00643679	181861	101992	206113	180897	177286	179487	165521	89112.2	64613.8	159921	117896	78416.2	140441	129798	147996	137151	117646	166112	0.117826	HMDB00746		8.6
IonPair	Fatty acyl carnitines	Acylcarnitine(C4:0)	1.09297	0.281718	4.51765e+06	4.93765e+06	3.2006e+06	4.7254e+06	4.8425e+06	5.06074e+06	4.75899e+06	4.65964e+06	4.95328e+06	5.04549e+06	5.07693e+06	4.95293e+06	4.77872e+06	4.75235e+06	5.09328e+06	4.45302e+06	5.00519e+06	4.88108e+06	0.04663	HMDB02013		4.65
IonPair	N-acetyl-amino acid	Nα-Acetylglutamine	1.04171	0.820951	328960	342679	273698	279398	311799	384369	395534	244259	378684	370840	503898	215714	236890	223533	272921	249099	432169	227832	0.290846	HMDB06029		6.18
IonPair	Fatty acyl carnitines	Acylcarnitine(C3:0)	0.419691	0.000731706	3.2735e+06	1.37386e+06	3.92176e+06	3.44236e+06	3.44398e+06	2.56114e+06	2.99824e+06	1.06775e+06	971939	1.72103e+06	2.26443e+06	844139	2.45028e+06	2.31504e+06	2.49504e+06	2.35371e+06	1.63265e+06	2.47813e+06	0.143651			1.89
IonPair	Fatty acyl CoAs	AcylCoA(C3:0)	0.0921091	0.0513912	694557	63975	1.50223e+06	76320.1	693966	577335	622934	62039.3	22150	67304.6	71929.1	96452.1	113268	100453	96280.8	121578	143612	121021	0.147101			10.52
GC/MS	Ala/Asp/Glu pathway	Glutamic acid	1.39388	0.126455	439718	612915	364126	396462	402307	650126	385569	655368	474110	716538	375351	843210	142404	371738	356402	345347	370884	374257	0.263514
GC/MS	Ala/Asp/Glu pathway	Aspartic acid	1.03734	0.821187	18597.4	19291.8	20459	20228	19978	17245	15077	26027	25069	15726	17721	11916	8213	18950	17678	18329	20185	18054	0.247438
GC/MS	Ala/Asp/Glu pathway	Alanine	0.893511	0.595506	54676	48853.6	87918	49341	44960	31882	59279	33791	54483	58572	45431	51991	23990	57357	53862	52113	55224	52777	0.235901
GC/MS	Arg/Pro pathway	Proline	0.851939	0.465465	24329.2	20727	27861	17029	38959	14970	22827	20317	25506	20623	21254	15935	11309	24655	24295	23574	22577	23381	0.226996
GC/MS	BCAA pathway	Isoleucine	0.811873	0.437581	5400.6	4384.6	5036	4037	9775	3464	4691	4744	5941	3589	3910	3739	2441	5281	5060	5005	5045	4519	0.240852
GC/MS	BCAA pathway	Valine	0.829812	0.482141	142675	118393	135915	100082	255192	89810	132376	111497	160328	86326	132676	101140	71189	140425	135027	132927	137951	135316	0.230057
IonPair	Bile acid	Glycocholic acid	1.50878	0.0407945	121837	183825	164426	108620	112641	87645	135854	206839	170436	242622	117044	182187	183182	200682	168931	156852	153363	142011	0.128375			13.65
IonPair	Bile acid	Muricholic acid	8.15771	0.25867	187117	1.52645e+06	277737	168401	214472	44823.9	230151	257648	833483	433306	527229	5.58056e+06	833657	795635	811987	811201	726372	675391	0.0791095			10.98
IonPair	Bile acid	Taurocholic acid	1.13659	0.508854	3.63906e+07	4.13612e+07	3.81576e+07	2.46937e+07	5.09171e+07	2.6892e+07	4.12924e+07	3.13493e+07	5.06928e+07	5.43723e+07	4.34065e+07	2.69853e+07	4.03394e+07	3.5686e+07	3.32042e+07	3.80646e+07	4.08053e+07	3.98357e+07	0.0790315			11.14
IonPair	Bile acid	TUDCA_TDCA_TCDCA	1.43177	0.0462833	4.03489e+06	5.77704e+06	3.72841e+06	4.37834e+06	4.40311e+06	3.78665e+06	3.87794e+06	4.79106e+06	5.0966e+06	4.59303e+06	7.81933e+06	6.5852e+06	5.20078e+06	4.54518e+06	4.87977e+06	4.76764e+06	4.47085e+06	5.20071e+06	0.064636			0
Lipidomics	Cardiolipin	CL(aaaa-66:3)	2.87444	0.0425606	6.3542e+06	1.82647e+07	5.45266e+06	4746082	6718908	9113385	5739940	24585682	10683679	7106005	20190892	28757398	11281529	12160324	10930534	12082353	11629807	12702469	0.0512929		M-H	10.3939	1374.95
Lipidomics	Cardiolipin	CL(aaaa-66:4)	2.18291	0.182515	4.2765e+06	9.33522e+06	3.78032e+06	2.90668e+06	4631698	6.54859e+06	3.51518e+06	15071955	2.4672e+06	1.02836e+06	13104719	15003856	6.25082e+06	6.69612e+06	7.08652e+06	6.34985e+06	7435252	7108244	0.062829		M-H	10.2501	1372.94
Lipidomics	Cardiolipin	CL(aaaa-66:4)	2.64018	0.0241774	1.0187e+07	2.68957e+07	8154774	9957652	11234651	14161160	7.42701e+06	31463970	23350566	10314764	30106872	39242280	18864982	18752526	19293792	17776002	18329840	18298862	0.0376609		M-H	10.3217	1372.94
Lipidomics	Cardiolipin	CL(aaaa-68:2)	1.88189	0.130063	69257520	130334960	50600168	61445368	82302608	82886968	69052488	217658752	98903936	47855248	94496640	192760224	100470960	101987616	96947848	96734224	97140208	90332096	0.0576819		M-H	10.637	1405
Lipidomics	Cardiolipin	CL(aaaa-68:3)	2.01343	0.11807	6.6862e+07	1.34622e+08	49676652	57895532	75282160	84091344	67364416	221480320	85094296	47251508	112668720	206615552	96903424	98947152	94022656	98119720	94435184	90949792	0.0307417		M-H	10.5364	1402.98
Lipidomics	Cardiolipin	CL(aaaa-68:4)	2.34427	0.0506296	7.21013e+07	1.69025e+08	60122252	60407664	79276424	91930120	68770176	240079104	117330176	67927392	167106352	252682048	116536080	120485848	111670272	114785256	118984528	111274824	0.032488		M-H	10.4388	1400.97
Lipidomics	Cardiolipin	CL(aaaa-68:5)	1.81892	0.0437897	1.82095e+08	3.31215e+08	171829632	180158736	182024832	213614576	162845440	362601376	289761728	159414560	373660224	470639488	261610752	268598688	264060976	249186784	255155760	262257824	0.026829		M-H	10.3317	1398.95
Lipidomics	Cardiolipin	CL(aaaa-68:6)	1.39041	0.273378	2.14352e+08	298037976	199833024	193872592	194753392	253378208	229924512	385651424	184625888	100207096	385078432	434627040	257426896	259712496	288031712	274324160	255869056	261442608	0.0530424		M-H	10.2631	1396.94
Lipidomics	Cardiolipin	CL(aaaa-69:5)	1.70994	0.0426272	2.15402e+07	3.68326e+07	23674750	20483194	19499396	22968616	21075246	49503684	29919300	20055382	42435004	42249576	29649830	31100536	29258008	25082400	28952326	28429174	0.0637965		M-H	10.393	1412.97
Lipidomics	Cardiolipin	CL(aaaa-69:6)	1.29142	0.125596	2.5823e+07	33348348	26126128	24966470	26654668	27299816	24067716	36396248	27842884	21083064	39119952	42299592	29990388	29966020	28835458	30180790	31006348	30429486	0.0340227		M-H	10.3092	1410.96
Lipidomics	Cardiolipin	CL(aaaa-70:3)	1.4966	0.155873	1.41515e+07	21179161	12175321	13268249	15549465	15246409	14518002	32954692	17306360	11085659	16561248	27987846	15221278	16748683	16809522	15397718	17322936	13717602	0.104475		M-H	10.7178	1431.02
Lipidomics	Cardiolipin	CL(aaaa-70:4)	1.91638	0.0628977	1.13794e+08	2.18072e+08	105876840	103645640	121187928	132892808	105365936	351899552	175829616	113476840	187056768	262097408	158928048	151343520	164463488	155890544	160775920	152573872	0.0306572		M-H	10.5496	1429
Lipidomics	Cardiolipin	CL(aaaa-70:5)	1.93649	0.0424049	330240544	6.39506e+08	303561632	286413984	341206944	405214784	314805376	906181570	536387456	313619296	608658370	832682690	478015776	485740032	467925184	474143360	487244896	476064032	0.0301759		M-H	10.4603	1426.99
Lipidomics	Cardiolipin	CL(aaaa-70:6)	1.45628	0.0316274	4.93184e+08	7.18213e+08	456730976	508695680	484589920	544587970	471316800	719154500	747679360	471081024	741920380	911231040	597159170	610440640	608204350	597606020	607787710	618695680	0.0138225		M-H	10.3747	1424.97
Lipidomics	Cardiolipin	CL(aaaa-70:7)	0.965236	0.829241	2539154432	2450883432	2658600700	2278425090	2417770750	2778644740	2562330880	2992786430	1790039300	1313652480	3004256770	3153682180	2469327620	2551959810	2599305220	2415183360	2420137730	2530558210	0.0332801		M-H	10.2791	1422.96
Lipidomics	Cardiolipin	CL(aaaa-70:8)	1.0862	0.74912	2.96015e+07	3.21533e+07	27500768	29472226	28251816	28895974	33886892	44934532	14882529	13493811	46287440	41168024	36776876	31735020	32100336	32668540	31330876	32510032	0.0568056		M-H	10.2351	1420.94
Lipidomics	Cardiolipin	CL(aaaa-71:5)	2.75251	0.0578583	4.59499e+06	1.26477e+07	4524793	4.11963e+06	5225898	4.89201e+06	4.21261e+06	22096366	11222560	3972999	9781977	16164739	6.93191e+06	7186017	9372574	7.52671e+06	9008739	11071700	0.18573		M-H	10.5251	1441
Lipidomics	Cardiolipin	CL(aaaa-71:6)	1.58413	0.0613608	40973088	64906508	42666352	36513500	41971612	43515072	40198904	90261656	59424060	34622896	63411240	76812688	51847336	53920200	52053124	51619240	52672416	53067152	0.0156762		M-H	10.4374	1438.99
Lipidomics	Cardiolipin	CL(aaaa-71:7)	0.965641	0.737483	1.10671e+08	1.06869e+08	120913096	107131616	107119040	109656688	108535744	122752184	93345448	72586032	119775360	125884400	110132856	113027816	110827680	106495320	107024024	109590960	0.02078		M-H	10.342	1436.97
Lipidomics	Cardiolipin	CL(aaaa-71:8)	0.703095	0.0864847	1.63712e+07	1.15105e+07	19581432	16369172	9592070	16076468	20236812	14938936	7808389	7713614	14860306	12231234	15290031	14161451	16007703	15416982	14453825	15301046	0.0453338		M-H	10.2623	1434.95
Lipidomics	Cardiolipin	CL(aaaa-72:5)	1.80042	0.027729	3.90388e+07	7.0286e+07	36289540	35633216	40261264	43640348	39369496	100613224	74465000	45535756	56850436	73965816	54617148	48982752	53643460	54433412	54133848	54662152	0.0431703		M-H	10.5668	1455.01
Lipidomics	Cardiolipin	CL(aaaa-72:6)	1.61187	0.0497982	626472128	1009789414	579644800	571510910	658568700	729735810	592900420	1427451390	1028338820	597845570	850335550	1144975740	786961540	747273150	799950980	790873920	778075460	792762750	0.0247775		M-H	10.5133	1453
Lipidomics	Cardiolipin	CL(aaaa-72:7)	1.02215	0.800476	8435977300	8622813300	9254341600	7546879500	8248757200	8938487800	8191420400	10381609000	7729352200	6701708300	9087449100	9213947900	8495484400	8626182100	8441551900	8422283800	8617302000	8607640600	0.0159844		M-H	10.3967	1450.98
Lipidomics	Cardiolipin	CL(aaaa-72:8)	0.712301	0.0175778	15925334200	11343631780	18785792000	15010386900	15126310900	15312871400	15391309800	14777478100	8092432400	9068145700	13260176400	11519926300	13585284100	13928024100	13936229400	13293656100	13447474200	13649270800	0.0181467		M-H	10.3166	1448.97
Lipidomics	Cardiolipin	CL(aaaa-72:9)	0.80399	0.230754	2.63044e+08	2.11485e+08	285142464	241319840	245762944	241089184	301906880	268206688	114545776	142657120	297966368	234049440	241497344	246691824	255965632	238616272	238671232	248222208	0.0293546		M-H	10.249	1446.95
Lipidomics	Cardiolipin	CL(aaaa-73:6)	1.23962	0.020599	1.9972e+06	2.47578e+06	2.18644e+06	1.76039e+06	1627261	2.10283e+06	2309094	2499392	2.48648e+06	2537548	2.11964e+06	2.73583e+06	1.37739e+06	1.97035e+06	2.47955e+06	1.45405e+06	2.07052e+06	1.57243e+06	0.215504		M-H	10.5706	1467.02
Lipidomics	Cardiolipin	CL(aaaa-73:7)	0.903927	0.483089	25537424	2.3084e+07	29262480	19823856	24963932	29093064	24543788	31522628	18760880	15280050	24554600	25301658	26711264	23229846	22042034	26067900	25039310	25724420	0.0683935		M-H	10.4702	1465
Lipidomics	Cardiolipin	CL(aaaa-73:8)	0.891755	0.313425	1.4037e+07	1.25175e+07	16821884	12412828	13542096	12739466	14668640	12961772	11801419	8680873	13419702	15723950	14945802	13715512	11514043	13635208	13074385	12525886	0.107289		M-H	10.3869	1462.98
Lipidomics	Cardiolipin	CL(aaaa-74:8)	0.819013	0.0761045	996765990	816364108	1161464960	836746750	938800640	1054220670	992596930	1037853440	750547070	615953280	822054460	855412290	911757120	916870400	904727620	912894340	908280700	907250500	0.0141068		M-H	10.4734	1477
Lipidomics	Cardiolipin	CL(aaaa-74:10)	1.02653	0.730322	562227596	5.77141e+08	577811710	545965380	550697150	573833470	562830270	635097660	483707008	475493696	637030660	654374530	542103940	574035710	556020480	545418500	560391420	567894910	0.0204421		M-H	10.373	1472.97
Lipidomics	Cardiolipin	CL(aaaa-76:10)	1.10387	0.242685	3.29376e+07	3.63588e+07	31089024	32044356	33300060	34134256	34120200	44129768	37900880	30572298	31460364	37730688	30722588	29909546	31152232	31596072	30078976	32032650	0.0367602		M-H	10.538	1501
Lipidomics	Cardiolipin	CL(aaaa-76:11)	1.26135	0.0211592	4.06692e+08	5.1298e+08	450340704	364709664	388586368	422565888	407255200	574899070	458736832	422443680	544902780	563917180	445127520	465666688	442775936	440825280	457090304	462184768	0.022762		M-H	10.4003	1498.98
Lipidomics	Cardiolipin	CL(aaaa-76:12)	1.0155	0.896902	617642126	6.27216e+08	696571140	552664450	599418620	613698500	625857920	756361020	465645376	465860800	733238270	714974590	620974850	633090880	628171580	601432320	615260420	624291140	0.0178135		M-H	10.3338	1496.97
Lipidomics	Ceramide	Cer(14:0)	0.646173	0.0052756	1.7575e+06	1.13565e+06	2.2486e+06	1.56101e+06	1.78337e+06	1568752	1.62577e+06	980788	1.33051e+06	1118966	1.22832e+06	1.01966e+06	1.53129e+06	1.24483e+06	1318334	1301281	1.58514e+06	1.40503e+06	0.110153		M+Acid	9.73112	509.48
Lipidomics	Ceramide	Cer(15:0)	0.797309	0.107684	2.37975e+06	1.89739e+06	2.67195e+06	2.4308e+06	2.3931e+06	1.97043e+06	2.43246e+06	1.38922e+06	1.94697e+06	2.6311e+06	2.07485e+06	1.44483e+06	2.26948e+06	1.64846e+06	2.08798e+06	2.20919e+06	2.25438e+06	2.2177e+06	0.105896		M+Acid	9.87272	523.496
Lipidomics	Ceramide	Cer(16:0)	0.813277	0.210814	3.40229e+07	2.767e+07	35437856	33757040	33517560	33626848	33775144	18791822	28603436	43197908	26526348	21230668	30290608	30622932	29655112	30718454	30370592	29995512	0.0230663		M+Acid	10.0009	537.511
Lipidomics	Ceramide	Cer(16:1)	0.632078	0.0023971	5.02379e+06	3175429	6245833	5.06763e+06	4829495	4290595	4685398	2.71222e+06	3.97961e+06	3309940	3138454	2736925	3.40197e+06	4.17894e+06	4296177	4.16571e+06	3.87267e+06	4.23644e+06	0.0787342		M+Acid	9.81247	535.496
Lipidomics	Ceramide	Cer(18:0)	0.79818	0.279951	1.65387e+07	1.32009e+07	16776464	17863614	18796808	14054555	15202228	5420457	20654352	16951106	11436410	11542076	15873237	14654220	15468675	14933363	15503243	15174757	0.0266896		M+Acid	10.232	565.542
Lipidomics	Ceramide	Cer(19:0)	0.734519	0.0599083	6.09349e+06	4.47578e+06	6.2576e+06	5522056	7.29468e+06	4982211	6.4109e+06	2.71525e+06	6.43662e+06	3.98021e+06	4.60565e+06	4641193	5429491	5885731	5962624	5203436	5.93185e+06	5.16682e+06	0.0836433		M+Acid	10.3281	579.557
Lipidomics	Ceramide	Cer(20:0)	0.744787	0.05354	9.15352e+07	68174260	82766120	80865568	109218256	92569688	92256560	49880344	100691240	64077616	62404028	63818072	84483376	83631328	80284456	79320368	81099280	79924160	0.0284768		M+Acid	10.4306	593.574
Lipidomics	Ceramide	Cer(20:1)	0.791849	0.157033	6210611	4.91787e+06	5673824	5.53582e+06	6998087	6.53208e+06	6313244	3.30482e+06	7521219	4.0618e+06	4327784	5373712	5483326	5.02165e+06	5121495	5631116	5.1235e+06	5450830	0.0648313		M+Acid	10.2825	591.558
Lipidomics	Ceramide	Cer(21:0)	0.555049	0.000118589	122561536	6.80276e+07	118560888	124347328	129132264	116365872	124401328	57990148	84576560	56007004	71332544	70231968	99543176	99031368	96540872	95823088	94326536	94570616	0.0237788		M+Acid	10.5335	607.589
Lipidomics	Ceramide	Cer(21:1)	0.838102	0.328123	3.54222e+06	2.96874e+06	2.96927e+06	2870634	3870171	3.6213e+06	4.37971e+06	2255314	4.60204e+06	1930629	2878825	3.17689e+06	2821135	3.09954e+06	3.37591e+06	3.31392e+06	3.09786e+06	3.48658e+06	0.0714003		M+Acid	10.3887	605.573
Lipidomics	Ceramide	Cer(22:0)	0.611051	7.05299e-06	1274030414	778496972	1283814910	1255904130	1318146690	1323570820	1188715520	746716990	897949500	681079170	785840130	780899070	1120168700	1109442180	1072783490	1071789820	1064632700	1016939460	0.0366977		M+Acid	10.6125	621.604
Lipidomics	Ceramide	Cer(22:1)	0.669932	0.000363005	274922720	1.84179e+08	257024800	254826240	299615744	283074560	280072256	155274112	218416656	160177232	196291872	190737216	233471136	231310304	236971856	232282480	230755024	229515360	0.0106079		M+Acid	10.4724	619.589
Lipidomics	Ceramide	Cer(22:2)	1.38078	0.00701633	2.13688e+06	2.95056e+06	2.14196e+06	1.79738e+06	2206142	2.08542e+06	2.45352e+06	2.58365e+06	3620352	2.97446e+06	2.70059e+06	2.87372e+06	2.1719e+06	2.33823e+06	2.66038e+06	2.43232e+06	2.93378e+06	2.55044e+06	0.098348		M+Acid	10.3223	617.572
Lipidomics	Ceramide	Cer(23:0)	1.06018	0.118517	777955980	824772620	824032190	766354750	751989700	723846590	823556670	835697660	881087680	784104640	788452990	834520130	855553540	844380420	845064640	837334270	816336830	810348860	0.0230417		M+Acid	10.71	635.62
Lipidomics	Ceramide	Cer(23:1)	0.829183	0.00123277	3.72859e+08	3.09168e+08	376116672	361748928	371145120	348010176	407274688	282137504	306764256	303388256	326847264	326705088	339051136	350966688	343014496	343097376	340360256	339413760	0.0149002		M+Acid	10.5663	633.605
Lipidomics	Ceramide	Cer(23:2)	0.865947	0.0943502	7.39158e+06	6400720	7.4252e+06	6.40149e+06	7768037	7.04719e+06	8315980	5119723	6060555	7.59678e+06	6.68323e+06	6543313	6593089	7509925	7.03833e+06	7.04901e+06	7221098	7403404	0.0418681		M+Acid	10.4133	631.588
Lipidomics	Ceramide	Cer(24:0)	1.25864	3.1826e-05	1595821824	2008560206	1663860990	1534427010	1600557060	1617623680	1562640380	1976688900	1992810240	1913263870	2129565700	2030472320	1971785470	1961268220	1952934910	1945617020	1908430210	1910115580	0.016374		M+Acid	10.7809	649.635
Lipidomics	Ceramide	Cer(24:1)	0.991182	0.799221	2975816908	2949577420	3093447420	2687299330	3068410620	3022565630	3007361540	2802968060	2979686660	3186486270	2936299520	2842446590	3072515330	3067781630	3016902400	3023455740	2992580860	2894268670	0.0220407		M+Acid	10.627	647.62
Lipidomics	Ceramide	Cer(24:2)	0.904186	0.224496	498897344	4.51096e+08	512708352	447346368	513457472	489571712	531402816	362413472	462539776	553173120	466792480	410560864	476066208	470884832	481234304	470258496	475365472	467837568	0.00985655		M+Acid	10.5003	645.604
Lipidomics	Ceramide	Cer(24:3)	0.932991	0.565371	1.13571e+07	1.05961e+07	10624572	9507607	12167336	12495102	11990779	7281910	10690986	13968579	11652763	9386045	10450044	10871783	9953016	11066026	10656207	10863466	0.0443377		M+Acid	10.3757	643.588
Lipidomics	Ceramide	Cer(25:0)	1.48483	0.00902995	1.32213e+08	1.96313e+08	133318272	129425336	134575728	129914032	133831128	214426432	222581376	150557360	179928160	214073984	189191936	175013984	176836560	174813680	169686592	162975312	0.052611		M+Acid	10.8489	663.65
Lipidomics	Ceramide	Cer(25:1)	1.10439	0.0661218	61662336	6.80996e+07	64330800	54997608	62631632	59195760	67155880	66797104	72513320	73624880	62134736	65427788	69217120	67505192	67853408	68175568	67821192	64346436	0.0316711		M+Acid	10.7156	661.635
Lipidomics	Ceramide	Cer(25:2)	0.95393	0.584333	5.51748e+06	5263289	6.26105e+06	4865923	5.39532e+06	4480756	6584354	4.95448e+06	4.94451e+06	5885630	5.40866e+06	5.12317e+06	4.87327e+06	5399923	5738182	5619276	6010177	5.08116e+06	0.0725974		M+Acid	10.5972	659.619
Lipidomics	Ceramide	Cer(26:0)	1.59271	0.0179185	1.19488e+07	19030901	11736174	10799368	13980563	10793731	12433932	20935446	24704074	14341739	15244020	19929226	16742677	16760849	15872983	15778850	14881365	14800201	0.0613026		M+Acid	10.9278	677.666
Lipidomics	Ceramide	Cer(26:1)	1.78177	1.87563e-05	1.77691e+07	31660582	19917602	14699172	19547378	15299246	19382236	32799902	33983540	30473606	31430792	29615070	27025142	27706654	27107526	27012600	26716230	25497404	0.0311491		M+Acid	10.7965	675.651
Lipidomics	Ceramide	Cer(26:2)	1.61189	0.000224939	4.41731e+06	7.12023e+06	5.34201e+06	4044066	4024387	3.83965e+06	4836436	8087052	7.61495e+06	6747559	6.72487e+06	6426700	5790754	5.21533e+06	5653815	5851767	5.60863e+06	5.32493e+06	0.0585905		M+Acid	10.6798	673.635
Lipidomics	Ceramide	Cer(26:7)	1.70996	0.0504793	1.20919e+06	2.06766e+06	1.26282e+06	1.01283e+06	1.32458e+06	1.14017e+06	1.30555e+06	1300398	2305525	3.1388e+06	1.70234e+06	1.89124e+06	2.03357e+06	1.45267e+06	1.82919e+06	1.77038e+06	1.54418e+06	1.65088e+06	0.111575		M+Acid	10.0894	663.558
Lipidomics	Ceramide-1P	Cer-1P(24:1)	1.05752	0.289114	4.3466e+06	4.59663e+06	4569456	4124160	3.88894e+06	4648851	4.50157e+06	4912751	4128971	5006940	4575750	4.35875e+06	4.42329e+06	4409988	4588379	4.35939e+06	3783891	4.36063e+06	0.0584989		M-H	10.48	727.586
Lipidomics	Cholesterol	Cholesterol	1.05204	0.315802	517507462	5.44437e+08	544282110	475494528	513064672	529198944	525497056	507648736	535930432	628886910	532817024	516900576	499992288	487854112	498651136	511685824	512473344	532609696	0.032485		M+H-H2O	9.54953	386.355
Lipidomics	Cholesterol	Cholesterol sulfate	1.0134	0.823522	1.55055e+08	1.57132e+08	178407296	143140304	150972528	144958400	157794736	163958880	151424032	140330608	152181040	177765632	158726544	156808272	160635328	158841632	156185856	157034176	0.0132799		M-H	8.2215	466.311
Lipidomics	Cholesterol	Cholesterol (-H2) sulfate	0.727379	0.0110419	1720977	1.2518e+06	1.62838e+06	1.60035e+06	1.78506e+06	1.84446e+06	1.74664e+06	988108	1.58846e+06	1.35817e+06	1.00755e+06	1.31672e+06	1.6298e+06	1419237	1.47301e+06	1459080	1429694	1.57245e+06	0.0603713		M-H	7.98474	464.296
Lipidomics	deoxy-Ceramide	deoxy-Cer(22:0)	1.09339	0.524322	1.29525e+06	1.41621e+06	1.70968e+06	947915	1.06809e+06	1.10348e+06	1.64708e+06	1.50336e+06	1.10419e+06	1.39889e+06	1.50831e+06	1566271	1358236	1005709	1.23513e+06	1.02923e+06	1.00368e+06	1.22573e+06	0.121873		M+Acid	10.6259	605.609
Lipidomics	deoxy-Ceramide	deoxy-Cer(24:0)	0.91961	0.614185	7.43164e+06	6.83421e+06	9168651	7639895	6981266	5.98809e+06	7380304	7896311	6281485	10123948	4459378	5409926	6083410	6575855	5914917	5.53382e+06	5.96946e+06	5202127	0.0741354		M+Acid	10.7745	633.641
Lipidomics	deoxy-Ceramide	deoxy-Cer(24:1)	1.79995	0.0995218	1.31458e+06	2.36617e+06	2035858	768467	1.20356e+06	1.11921e+06	1.4458e+06	3.40087e+06	1.5407e+06	3.63237e+06	2.01294e+06	1.24399e+06	1.73911e+06	1.4626e+06	2.1173e+06	1.59844e+06	2.21355e+06	1.86946e+06	0.149212		M+Acid	10.6455	631.625
Lipidomics	deoxy-Dihydroceramide	deoxy-DHC(20:0)	0.855028	0.183218	3.77001e+06	3.22347e+06	4.67979e+06	3.55684e+06	3302533	3128101	4.18282e+06	2985250	3446973	3945487	3216976	2.52266e+06	3.03714e+06	3.61223e+06	3.69811e+06	3.44545e+06	3.50583e+06	3.19866e+06	0.0680398		M+Acid	10.577	579.594
Lipidomics	deoxy-Dihydroceramide	deoxy-DHC(21:0)	0.827605	0.568396	343579	284347	321903	196748	248730	321081	629432	313985	347962	40875.8	291507	427408	463123	357776	405058	409043	366716	264907	0.162854		M+Acid	10.6843	593.609
Lipidomics	deoxy-Dihydroceramide	deoxy-DHC(22:0)	0.686926	0.00739572	4.4671e+06	3.06857e+06	4.93972e+06	4687364	4440569	3.82198e+06	4445870	3.12683e+06	2.89192e+06	4.16599e+06	2.22451e+06	2.93359e+06	3.65389e+06	3685811	3735448	3.47044e+06	2.87374e+06	3.35524e+06	0.0865173		M+Acid	10.7559	607.625
Lipidomics	deoxy-Dihydroceramide	deoxy-DHC(23:0)	1.12894	0.250624	2.51777e+06	2.84241e+06	2.8814e+06	2532828	2139607	2.16674e+06	2868287	3.21037e+06	2.6858e+06	2.59785e+06	2302001	3.41601e+06	3.0489e+06	2.88504e+06	2.77187e+06	2.47232e+06	2.80758e+06	3025306	0.0969094		M+Acid	10.8269	621.64
Lipidomics	deoxy-Dihydroceramide	deoxy-DHC(24:0)	0.759819	0.0115201	4.61967e+06	3.51012e+06	5.16022e+06	4543611	4.70915e+06	4033471	4.65192e+06	3813062	3476594	4348622	2774088	3138220	3956860	4.09426e+06	4.08583e+06	4423342	4241537	3634754	0.0604227		M+Acid	10.8954	635.656
Lipidomics	Diacylglycerol(acyl)	DG(aa-32:0)	0.234179	0.0124097	4.52644e+07	10599961	72197240	56803444	32610900	34989084	29721458	4160940	10270704	13350858	14096722	11120581	28057778	29925048	28827326	28067512	28047028	28027100	0.0328014		M+NH4	10.415	568.506
Lipidomics	Diacylglycerol(acyl)	DG(aa-32:1)	0.379447	0.0134496	3.5844e+07	1.36009e+07	53115104	45201776	30130134	28004418	22768512	7.54124e+06	11998057	6.85603e+06	23117302	18491838	22989978	24059434	22778098	26295324	25618892	24607234	0.0559441		M+NH4	10.2528	566.49
Lipidomics	Diacylglycerol(acyl)	DG(aa-32:2)	0.219368	0.030113	8.63906e+06	1.89513e+06	15532497	11527684	5337390	5643148	5.1546e+06	1.0246e+06	1.37231e+06	910002	3.84484e+06	2.3239e+06	4.14467e+06	4.76868e+06	4961146	5.17317e+06	4047604	5.06458e+06	0.096782		M+NH4	10.0962	564.475
Lipidomics	Diacylglycerol(acyl)	DG(aa-33:1)	0.541571	0.015525	5763099	3.12113e+06	7.83463e+06	6602240	4779835	5074082	4.5247e+06	2167917	3649860	1329643	4.12961e+06	4.32862e+06	5088483	4312708	4.0706e+06	4215752	5.13095e+06	4328815	0.0940789		M+NH4	10.3588	580.506
Lipidomics	Diacylglycerol(acyl)	DG(aa-33:2)	0.181849	0.0169497	2.42931e+06	441770	4.18031e+06	2793348	858482	2.16158e+06	2.15285e+06	0	0	0	1.20799e+06	1000854	1.46738e+06	2.29643e+06	1.88407e+06	1.52123e+06	1.59888e+06	1.34269e+06	0.218312		M+NH4	10.2145	578.49
Lipidomics	Diacylglycerol(acyl)	DG(aa-34:0)	0.37154	0.0306336	1.437e+07	5.33903e+06	24239446	16966044	9022433	10802630	10819558	4.01059e+06	4490716	7.70977e+06	5.68064e+06	4803441	10705959	11027512	10027171	9898408	9847146	9771392	0.0693031		M+NH4	10.6085	596.537
Lipidomics	Diacylglycerol(acyl)	DG(aa-34:1)	0.558833	0.0149108	4.59547e+08	2.5681e+08	612316540	548281600	385697344	418089504	333351264	182115792	256818752	169686272	353713344	321716928	366786720	363224352	361404576	355549056	362246016	351616096	0.0141858		M+NH4	10.4472	594.522
Lipidomics	Diacylglycerol(acyl)	DG(aa-34:2)	0.430084	0.00137492	1645794868	7.07829e+08	2127058430	1847826050	1424412930	1521638910	1308038020	509487680	608821310	478422944	1107113980	835300930	1192015620	1183647490	1184097280	1184485760	1173208060	1194498560	0.00743469		M+NH4	10.3116	592.506
Lipidomics	Diacylglycerol(acyl)	DG(aa-34:3)	0.490396	0.0183953	4.50565e+07	2.20955e+07	63282476	55637908	36522992	35294072	34545156	16450933	19532946	10393123	38571040	25529686	34106532	35190664	34029428	33594072	33029142	33419680	0.0213902		M+NH4	10.1542	590.49
Lipidomics	Diacylglycerol(acyl)	DG(aa-34:4)	0.1205	0.0963709	3.55588e+06	428484	8121459	5537485	1.99134e+06	2.12912e+06	0	0	399502	0	1.74292e+06	0	1.98628e+06	1.89621e+06	1.9055e+06	1.6541e+06	1.38874e+06	1.41393e+06	0.153558		M+NH4	10.0247	588.475
Lipidomics	Diacylglycerol(acyl)	DG(aa-35:1)	0.495548	0.0468858	9.08091e+06	4500027	14747921	10867867	6.26856e+06	6601101	6.9191e+06	1994980	4538419	4450353	6093219	5423164	6.5889e+06	6514084	6.69448e+06	7206283	6.84655e+06	6564756	0.035177		M+NH4	10.5482	608.537
Lipidomics	Diacylglycerol(acyl)	DG(aa-35:2)	0.494368	0.049353	2.64142e+07	1.30583e+07	44298120	29250596	19118740	18314156	21089254	10390350	13018310	7.88708e+06	18858780	15137130	20611486	19589014	19771932	17698496	19918840	19120140	0.0463129		M+NH4	10.4093	606.522
Lipidomics	Diacylglycerol(acyl)	DG(aa-35:3)	0.415557	0.0367788	1.04985e+07	4.36273e+06	17656774	12080607	6.54031e+06	6988130	9226823	3.2408e+06	3.24874e+06	2241607	7923850	5.15868e+06	6332332	6544123	6968238	6968305	7.33917e+06	7499072	0.06398		M+NH4	10.2629	604.506
Lipidomics	Diacylglycerol(acyl)	DG(aa-36:1)	0.426289	0.0709711	37640554	16045747	70217752	42902984	22754312	26741042	25586680	11397894	16879966	17997088	19577900	14375887	28841272	27600460	27000600	28615604	27639242	27532298	0.0239671		M+NH4	10.6375	622.553
Lipidomics	Diacylglycerol(acyl)	DG(aa-36:2)	0.584104	0.108863	2.81006e+08	1.64137e+08	480991520	332254560	188721120	210809600	192252976	145300528	191697024	98284016	209688832	175713536	218339536	219715168	222250432	222753632	217797952	225466576	0.0150053		M+NH4	10.501	620.537
Lipidomics	Diacylglycerol(acyl)	DG(aa-36:3)	0.527143	0.0440068	1270176104	669564392	2028905860	1438453380	926102460	1008490560	948928260	600961920	683307330	400693440	943427970	719431300	989268860	991807620	977236610	1003177020	982191360	976431810	0.00944736		M+NH4	10.3632	618.521
Lipidomics	Diacylglycerol(acyl)	DG(aa-36:4)	0.493803	0.0154658	3.88503e+08	1.91844e+08	561443260	457216544	299236992	322608512	302011904	166187696	152407792	139840064	292253600	208532352	285500032	294848288	290361440	295566272	284215104	288303360	0.0148564		M+NH4	10.2316	616.506
Lipidomics	Diacylglycerol(acyl)	DG(aa-36:5)	0.247021	0.00784546	1.50785e+07	3.72472e+06	22654124	19732242	11264006	11675164	10067145	2.31352e+06	2.48205e+06	2132361	8.21546e+06	3.4802e+06	8988880	9408861	9488824	8.35295e+06	8666801	9503647	0.0609082		M+NH4	10.0905	614.49
Lipidomics	Diacylglycerol(acyl)	DG(aa-37:1)	0.432818	0.142127	3.034e+06	1.31317e+06	6626922	3114944	1.56441e+06	1587404	2276303	1.26731e+06	729419	1.70898e+06	1.40374e+06	1.45639e+06	2.17724e+06	1.47632e+06	2249344	1.41341e+06	1.92933e+06	1.95941e+06	0.172128		M+NH4	10.7176	636.569
Lipidomics	Diacylglycerol(acyl)	DG(aa-37:2)	0.628885	0.276902	6.48373e+06	4.07752e+06	13113279	7.57081e+06	3.35472e+06	2812754	5567100	2.45638e+06	4536368	3.28488e+06	6287327	3822668	5.20497e+06	5.83364e+06	5255619	5344679	5.62023e+06	5447768	0.0576623		M+NH4	10.593	634.553
Lipidomics	Diacylglycerol(acyl)	DG(aa-37:3)	0.395779	0.16407	3.52991e+06	1.39707e+06	7809185	4.10761e+06	939085	1249878	3.54381e+06	194214	1.54797e+06	742617	2431956	2.06857e+06	2.67248e+06	2.43997e+06	2754070	2.07639e+06	2.61377e+06	2368837	0.103344		M+NH4	10.4491	632.536
Lipidomics	Diacylglycerol(acyl)	DG(aa-38:1)	0.179969	0.0370305	8.01736e+06	1.44287e+06	15982424	8933802	3.79041e+06	5889671	5490507	621690	1.74327e+06	2256729	2.05211e+06	540566	4415472	3.80484e+06	4306241	4409076	4.08621e+06	4266647	0.0535134		M+NH4	10.7978	650.585
Lipidomics	Diacylglycerol(acyl)	DG(aa-38:2)	0.393535	0.0870805	3.90451e+07	1.53656e+07	78707848	42000492	20373216	26375906	27768144	9696292	18624256	11632096	22696606	14178822	28215020	26127364	27110304	29564834	28451606	27535142	0.0453646		M+NH4	10.672	648.569
Lipidomics	Diacylglycerol(acyl)	DG(aa-38:3)	0.42966	0.100938	8.70875e+07	3.7418e+07	175239728	95022328	48810412	57295332	59069756	25380252	46406536	31679748	47939288	35684108	57838816	58596840	56903444	61928888	61501772	59619108	0.0308701		M+NH4	10.5524	646.552
Lipidomics	Diacylglycerol(acyl)	DG(aa-38:4)	0.734867	0.209678	38132288	2.80222e+07	63649412	39480068	28492918	31591888	27447154	23548550	31298236	25347178	30638046	29278816	33500580	33462492	33576452	33043804	35151716	32833630	0.0228141		M+NH4	10.4195	644.537
Lipidomics	Diacylglycerol(acyl)	DG(aa-38:5)	0.793013	0.0679566	1.42436e+08	1.12954e+08	185663456	143320864	127952752	135404240	119840080	100293984	104047184	99991080	134953824	125482736	131228088	131482760	130598672	132041000	124940904	130283064	0.0183788		M+NH4	10.3456	642.521
Lipidomics	Diacylglycerol(acyl)	DG(aa-38:6)	0.560448	0.00184331	4.54484e+08	2.54715e+08	547985020	472209248	419762176	439507648	392956864	190826448	203046848	212859216	361389632	305451712	348542144	340863392	341131648	344424032	340705472	340152832	0.0100544		M+NH4	10.2739	640.505
Lipidomics	Diacylglycerol(acyl)	DG(aa-38:7)	0.472325	0.0165795	1.07034e+07	5.05551e+06	14782957	13852515	9024889	8008102	7848765	4.18456e+06	4730058	2208963	8342269	5811699	7.77657e+06	7416037	6.79463e+06	8007824	8732895	7133075	0.0822886		M+NH4	10.1032	638.491
Lipidomics	Diacylglycerol(acyl)	DG(aa-39:2)	0.362998	0.203389	2.62023e+06	951137	5064011	1.65749e+06	277470	823736	5278429	0	1.34877e+06	2.29833e+06	1.10858e+06	0	2.47003e+06	2.15665e+06	1.88582e+06	2.20643e+06	2.18011e+06	1.64385e+06	0.145377		M+NH4	10.7547	662.585
Lipidomics	Diacylglycerol(acyl)	DG(aa-39:4)	2.30508	0.0380824	440611	1.01564e+06	1.0713e+06	0	301531	247300	582924	690027	765838	1.45771e+06	1.08998e+06	1.07466e+06	1.03465e+06	996349	677129	1.02308e+06	708395	774863	0.18252		M+NH4	10.5824	658.552
Lipidomics	Diacylglycerol(acyl)	DG(aa-40:1)	0.221047	0.0439808	1.57262e+06	347623	2.53805e+06	1.26963e+06	423621	1.044e+06	2.58781e+06	345597	537981	0	508771	345767	815564	792503	1.03355e+06	838575	927798	1.29885e+06	0.210732		M+NH4	10.9455	678.615
Lipidomics	Diacylglycerol(acyl)	DG(aa-40:2)	0.263478	0.0535921	7.37228e+06	1.94244e+06	14444161	6.75446e+06	2.801e+06	4.3021e+06	8559662	1731697	2.2934e+06	3.32614e+06	2.03076e+06	330176	3.58696e+06	4.31042e+06	4815648	3.46774e+06	4014007	4.14397e+06	0.113052		M+NH4	10.8243	676.6
Lipidomics	Diacylglycerol(acyl)	DG(aa-40:3)	0.24517	0.0598112	8.19239e+06	2.00853e+06	17048412	7630972	3242385	4.93939e+06	8100793	999086	2460139	2.4076e+06	2.85112e+06	1324711	4773265	4366099	4600290	5283904	4756952	5025120	0.0692475		M+NH4	10.7204	674.584
Lipidomics	Diacylglycerol(acyl)	DG(aa-40:4)	1.11626	0.680664	2.69593e+06	3.00936e+06	4.95993e+06	2412540	1.9177e+06	1.4678e+06	2721673	2.2317e+06	3.05883e+06	4.43459e+06	3.14367e+06	2.17802e+06	2.00018e+06	2523305	2.3372e+06	1.80811e+06	2738222	2.27279e+06	0.136904		M+NH4	10.6291	672.568
Lipidomics	Diacylglycerol(acyl)	DG(aa-40:5)	0.894233	0.578802	7.92922e+06	7.09057e+06	11798030	6747112	7.244e+06	8393709	5463260	4426476	7800034	10114770	7432435	5679129	6.81549e+06	7096447	6.93628e+06	7742103	7273793	8503089	0.0845119		M+NH4	10.527	670.553
Lipidomics	Diacylglycerol(acyl)	DG(aa-40:6)	0.672795	0.0478137	2.86189e+07	1.92546e+07	39141224	30799964	23177856	28934940	21040492	11707512	20291436	23384260	24384090	16505893	24362774	23911272	24789398	22583898	23621662	23339698	0.0308836		M+NH4	10.3974	668.538
Lipidomics	Diacylglycerol(acyl)	DG(aa-40:7)	0.59907	0.017329	242825008	1.45469e+08	342114496	248253120	198169616	223641856	201945952	115580208	137482112	123987520	205891872	144403952	195934512	195371232	194740640	189150080	190190448	194627440	0.015174		M+NH4	10.3066	666.522
Lipidomics	Diacylglycerol(acyl)	DG(aa-42:2)	0.495535	0.366433	2.95105e+06	1.46235e+06	5225160	917765	588439	1.00335e+06	7.02054e+06	230770	1.31844e+06	4291466	1.47108e+06	0	2.50239e+06	2138767	2115569	1.98683e+06	1.86726e+06	2.05433e+06	0.0976473		M+NH4	10.9662	704.632
Lipidomics	Diacylglycerol(acyl)	DG(aa-42:3)	0.369703	0.205524	5.0525e+06	1.86793e+06	9524354	2945948	638020	1.65861e+06	10495578	615271	2.13547e+06	4.24012e+06	2.3019e+06	46864.4	3751189	2.99921e+06	3245073	3.16907e+06	2.70371e+06	2856644	0.116636		M+NH4	10.8717	702.615
Lipidomics	Diacylglycerol(acyl)	DG(aa-42:5)	0.534684	0.463806	938496	501798	1.64736e+06	0	0	686503	2.35862e+06	0	449442	1.7191e+06	340449	0	675102	684791	629928	775750	717342	739295	0.128878		M+NH4	10.6872	698.584
Lipidomics	Diacylglycerol(acyl)	DG(aa-42:6)	0.382438	0.0474358	2.12801e+06	813833	3.65547e+06	1.70318e+06	1.41693e+06	2494741	1.36973e+06	0	1.0062e+06	1.30651e+06	1.75645e+06	0	1.25578e+06	890026	855158	1.23058e+06	1357534	1.36035e+06	0.191145		M+NH4	10.5642	696.57
Lipidomics	Diacylglycerol(acyl)	DG(aa-42:8)	0.578018	0.047195	3.75751e+06	2.17191e+06	5662934	3.60326e+06	2.33415e+06	4.07149e+06	3.11572e+06	1.24125e+06	2.30326e+06	2.39437e+06	3.23532e+06	1.68533e+06	2.55611e+06	3.54072e+06	3036454	2.92725e+06	3.23129e+06	3.31497e+06	0.112202		M+NH4	10.3434	692.539
Lipidomics	Diacylglycerol(alk)	DG(ae-34:0)	0.916335	0.645091	2.94758e+06	2.70097e+06	2.59212e+06	2371841	3.40218e+06	2352885	4018894	1.76988e+06	2960234	1.8812e+06	3.90178e+06	2991774	2.96552e+06	2.71809e+06	2.87782e+06	2967600	2.00432e+06	2.72958e+06	0.152398		M+NH4	10.7574	582.558
Lipidomics	Diacylglycerol(alk)	DG(ae-34:1)	7.58621	0.000442401	645124	4.89405e+06	642506	697712	678070	518720	688612	4.40519e+06	4.04975e+06	6.27317e+06	4.40775e+06	5334380	2152871	2.1292e+06	2.81858e+06	1.83787e+06	2.68967e+06	2049755	0.16913		M+NH4	10.6311	580.542
Lipidomics	Diacylglycerol(alk)	DG(ae-36:0)	1.19067	0.464577	1.99863e+06	2.3797e+06	991149	1.54777e+06	2.31659e+06	1.76224e+06	3.37538e+06	1982934	2.29943e+06	1588391	3045231	2982518	2.65607e+06	2.52852e+06	2567979	2386243	2.44936e+06	2.5111e+06	0.03984		M+NH4	10.9114	610.589
Lipidomics	Diacylglycerol(alk)	DG(ae-36:1)	1.47997	0.0405308	4.98261e+06	7.37411e+06	6.30809e+06	3.48103e+06	6.8426e+06	2.83162e+06	5.44971e+06	6.12947e+06	8213580	6299859	8997080	7.23055e+06	5.78609e+06	5664345	5897753	5604600	5.79117e+06	5.35882e+06	0.0776073		M+NH4	10.783	608.573
Lipidomics	Diacylglycerol(alk)	DG(ae-36:2)	2.08065	0.0692968	114879	239022	206055	60235	159890	30936.5	117278	264709	276512	383027	168991	101873	167428	156651	205262	115812	183483	202224	0.273424		M+NH4	10.7894	606.557
Lipidomics	Diacylglycerol(alk)	DG(ae-36:2)	2.08079	0.00650604	4.82596e+06	1.00418e+07	5.72444e+06	3.67035e+06	6.32488e+06	2.45882e+06	5951287	9316725	11549564	6.04838e+06	12595903	10698357	5624922	7663107	7.68166e+06	7430869	8420493	7.84992e+06	0.162556		M+NH4	10.6705	606.557
Lipidomics	Diacylglycerol(alk)	DG(ae-38:1)	1.49917	0.042959	4.27893e+06	6414841	3.70416e+06	3.33186e+06	5.22187e+06	3282659	5.85413e+06	6407191	6895255	4.03e+06	8.37898e+06	6362770	5453531	5047422	5099519	5.36587e+06	5.55027e+06	5.56793e+06	0.0405473		M+NH4	10.937	636.605
Lipidomics	Diacylglycerol(alk)	DG(ae-38:2)	0.961043	0.841447	5548372	5.33222e+06	5.52589e+06	4454402	6873602	3.43143e+06	7456536	6079939	5990554	2484970	6.63026e+06	5475396	4624433	4751744	5107446	5404496	4882208	4787385	0.0540648		M+NH4	10.8277	634.589
Lipidomics	Diacylglycerol(alk)	DG(ae-38:5)	3.43031	0.00613778	511055	1.75308e+06	560528	81378.4	537900	455286	920184	947167	1.59165e+06	2600628	1.91072e+06	1.71521e+06	919331	814377	1.02277e+06	957538	724455	959564	0.147936		M+NH4	10.6323	628.542
Lipidomics	Diacylglycerol(alk)	DG(ae-38:6)	1.7591	0.0130286	2.26041e+06	3.97628e+06	3.11339e+06	1.22858e+06	1929791	1.70665e+06	3323633	3.01484e+06	3.34273e+06	4894174	4386757	4.24292e+06	3058620	3.70126e+06	3.17607e+06	3.47146e+06	3.29437e+06	2.44828e+06	0.135934		M+NH4	10.4743	626.525
Lipidomics	Diacylglycerol(alk)	DG(ae-38:7)	1.77608	0.280025	296201	526077	627081	44331	0	0	809591	403333	389491	412311	786844	638407	229564	481060	335093	254963	406737	331930	0.264186		M+NH4	10.4581	624.511
Lipidomics	Diacylglycerol(alk)	DG(ae-40:1)	2.75411	0.0247135	260988	718792	0	0	501514	156722	646706	753114	770974	657951	646734	765186	530435	629796	503725	451816	602942	534897	0.117648		M+NH4	11.0696	664.636
Lipidomics	Diacylglycerol(alk)	DG(ae-40:2)	1.6303	0.0720136	1.39003e+06	2.26617e+06	857233	1.09421e+06	1.71188e+06	1.22328e+06	2.06357e+06	2.94643e+06	2.32048e+06	948947	2.71669e+06	2.3983e+06	2.1427e+06	1.74851e+06	2.28765e+06	2.00508e+06	1.76922e+06	1940363	0.166503		M+NH4	10.9536	662.621
Lipidomics	Diacylglycerol(alk)	DG(ae-40:3)	0.749611	0.191732	2.15796e+06	1.61763e+06	2.294e+06	1.53833e+06	2350427	1.47542e+06	3.13164e+06	1.79158e+06	1.89452e+06	745411	1757207	1.89945e+06	1.84099e+06	1.62759e+06	1.23772e+06	1.58706e+06	1758803	1.7368e+06	0.130867		M+NH4	10.8523	660.606
Lipidomics	Diacylglycerol(alk)	DG(ae-40:4)	2.16742	0.00483931	611395	1.32515e+06	798450	335474	707526	418225	797298	1.61526e+06	793733	1.31187e+06	1.57043e+06	1.33447e+06	662370	663870	827761	936351	714796	988788	0.161125		M+NH4	10.8277	658.591
Lipidomics	Diacylglycerol(alk)	DG(ae-40:5)	3.7599	7.1821e-05	1.01476e+06	3.8154e+06	1.21068e+06	657243	1.02845e+06	583317	1.59411e+06	3.53748e+06	2916740	4247071	4.51351e+06	3862211	2.04259e+06	2.3633e+06	2.689e+06	2.56413e+06	2.0547e+06	2.75366e+06	0.121621		M+NH4	10.7701	656.573
Lipidomics	Diacylglycerol(alk)	DG(ae-40:6)	3.97783	5.81173e-08	2.3138e+06	9.20388e+06	2.48968e+06	1531721	2750643	1.89642e+06	2.90052e+06	9118093	9311831	8427438	9982478	9179567	5.12211e+06	5.24381e+06	4608051	6.1164e+06	5964612	6.55313e+06	0.132905		M+NH4	10.6432	654.559
Lipidomics	Diacylglycerol(alk)	DG(ae-40:7)	33.961	0.000509244	56100.9	1.90524e+06	0	13809.8	120805	145890	0	1.54786e+06	1.8997e+06	1.4203e+06	2372978	2285383	983565	1.51517e+06	1099168	1.34199e+06	1437253	1.22643e+06	0.212876		M+NH4	10.5019	652.543
Lipidomics	Diacylglycerol(alk)	DG(ae-40:7)	1.81109	0.00961807	1.47929e+06	2.67913e+06	1.01405e+06	1.80275e+06	1.578e+06	1.47114e+06	1.53049e+06	2.37742e+06	1.8758e+06	3.14589e+06	2.52627e+06	3.47026e+06	1851370	2.42528e+06	2.41461e+06	2.30126e+06	2.22371e+06	2.16244e+06	0.0876298		M+NH4	10.6268	652.544
Lipidomics	Diacylglycerol(alk)	DG(ae-42:6)	1.2655	0.0947385	2.69195e+06	3.40667e+06	2.3767e+06	2.25834e+06	2.96933e+06	2.07933e+06	3776041	3.42594e+06	3686713	3.48484e+06	2.64728e+06	3.78858e+06	3.06797e+06	3.29326e+06	2.21121e+06	3251404	2916602	2.87681e+06	0.131643		M+NH4	10.7993	682.589
Lipidomics	Dihydroceramide	DHC(16:0)	0.887947	0.484775	1.99497e+06	1.77143e+06	2277282	1.97689e+06	1.82881e+06	1.75147e+06	2140427	1.01042e+06	1.75804e+06	2.70518e+06	1.91828e+06	1.46523e+06	1.27751e+06	2046399	1.66817e+06	1710962	2.05369e+06	2.02264e+06	0.174045		M+Acid	10.0916	539.526
Lipidomics	Dihydroceramide	DHC(18:0)	0.714786	0.369487	3.01076e+06	2.15205e+06	2113557	3.99652e+06	3.67318e+06	1.94381e+06	3326737	409687	2466502	4842120	2258454	783486	2758728	2.83145e+06	2.66652e+06	2693531	2287301	2.46935e+06	0.188535		M+Acid	10.3101	567.556
Lipidomics	Dihydroceramide	DHC(19:0)	0.64972	0.220332	316847	205862	193223	442755	373271	263849	311137	0	82920	329671	351294	265426	427704	281253	192730	313643	229579	357077	0.294754		M+Acid	10.4181	581.573
Lipidomics	Dihydroceramide	DHC(20:0)	0.700596	0.318506	1.86423e+07	13060726	15864999	24262630	22366012	10688987	20028928	4811683	9548068	30171912	13769280	7002687	17692704	16632301	16741793	15372288	15168466	15740358	0.066572		M+Acid	10.5135	595.589
Lipidomics	Dihydroceramide	DHC(22:0)	1.03802	0.520707	2.13362e+07	2.21473e+07	21351478	20530072	25384418	19990084	19424722	20770062	21593768	23066412	23697894	21608368	24545236	24864158	23124868	21328016	21172432	19347010	0.103396		M+Acid	10.6928	623.62
Lipidomics	Dihydroceramide	DHC(24:0)	0.827965	0.18808	861924	713643	984198	1.03004e+06	730550	801857	762974	635278	630681	574470	694262	1.03352e+06	968925	608876	644533	794493	1.01995e+06	640099	0.219377		M+Acid	10.8934	651.651
Lipidomics	Dihydrosphingomyelin	DHSM(14:0)	1.50487	0.129554	1.18252e+06	1.77954e+06	1.56836e+06	346517	1.49043e+06	1.368e+06	1.13929e+06	1.68073e+06	2.82974e+06	1641992	1.24913e+06	1496073	1.43109e+06	1.13709e+06	1.81405e+06	1469309	1.53379e+06	1.96159e+06	0.215242		M+H	9.57949	676.553
Lipidomics	Dihydrosphingomyelin	DHSM(16:0)	1.48122	0.269547	9.88892e+06	1.46477e+07	11724453	8592736	10164171	8932677	10030570	9583607	16440188	28411182	9898067	8905449	11745094	11210948	10044424	12519701	12169962	12033243	0.07742		M+H	9.8718	704.583
Lipidomics	Dihydrosphingomyelin	DHSM(20:0)	0.689978	0.00804123	2.01345e+07	1.38924e+07	22487912	20656268	21389168	18676512	17462772	10181938	14384866	18685610	14134332	12075170	16712390	15929868	17268126	15618170	17318714	15939991	0.0456054		M+H	10.3442	760.644
Lipidomics	Dihydrosphingomyelin	DHSM(21:0)	0.824356	0.463607	459858	379087	437529	555078	634386	401243	271055	397302	74545.9	515014	545429	363145	405256	479683	523187	349794	587766	384301	0.183309		M+H	10.4464	774.662
Lipidomics	Dihydrosphingomyelin	DHSM(22:0)	0.602683	0.00106082	82069336	4.94618e+07	97223528	87193480	84055768	71888744	69985160	44519340	54263164	59502492	42319496	46704560	71164888	72354288	65505408	63556792	63227552	67656936	0.0524991		M+H	10.5339	788.677
Lipidomics	Dolichol	Dolichol-17	13.3166	0.00331596	309314	4.11902e+06	0	0	0	479065	1.0675e+06	5.33967e+06	5.16074e+06	1.59389e+06	4323412	4.17738e+06	2.07232e+06	2.06166e+06	1.26368e+06	1.75449e+06	1.11612e+06	2000335	0.244331		M+NH4	11.7782	1177.09
Lipidomics	Fatty acyl carnitines	Acylcarnitine(C5:0)	0.468344	0.000146076	2.36707e+06	1.1086e+06	2.75823e+06	2.5732e+06	2.39728e+06	1.9898e+06	2.11683e+06	1.10113e+06	1.07713e+06	1.32914e+06	1296689	738931	1.65581e+06	1.63583e+06	1.665e+06	1621523	1687404	1.59634e+06	0.0387482		M+H	2.46311	245.163
Lipidomics	Fatty acyl carnitines	Acylcarnitine(C6:0)	1.00106	0.992374	4232983	4.23746e+06	2754112	4.15958e+06	4662950	4.83439e+06	4753883	3.39538e+06	4647718	4158732	4349048	4636421	4.06915e+06	4142985	4.15468e+06	3.98209e+06	4.20226e+06	4.18963e+06	0.0196675		M+H	3.02311	259.178
Lipidomics	Fatty acyl carnitines	Acylcarnitine(C7:0)	0.64885	0.0389355	376053	244002	212696	440258	433234	404784	389295	184564	223774	228562	369493	213618	307738	320753	268351	279605	321509	316543	0.0738154		M+H	3.62712	273.194
Lipidomics	Fatty acyl carnitines	Acylcarnitine(C7:1)	0.687111	0.0198734	35145.8	24149.1	30128.3	33340.3	42164	31503.9	38592.4	32518.8	27094.4	22872.4	23854.7	14404.9	88766.2	83743.6	94095.8	73637.8	80759.4	110185	0.130861		M+H	2.88022	271.178
Lipidomics	Fatty acyl carnitines	Acylcarnitine(C8:0)	1.22076	0.233885	2.84399e+06	3.47184e+06	1.66091e+06	2.57884e+06	2646004	3.8759e+06	3.45831e+06	2688316	3.72292e+06	2.84442e+06	3.97861e+06	4.12494e+06	3256158	2.95742e+06	3.2471e+06	3.19242e+06	3.24417e+06	2.92246e+06	0.0450259		M+H	4.31305	287.21
Lipidomics	Fatty acyl carnitines	Acylcarnitine(C8:1)	0.952638	0.7696	174420	166159	131474	164916	136245	233802	205662	99824.8	192841	208605	159875	169648	158445	188503	177104	158165	161389	188200	0.0850632		M+H	3.67783	285.194
Lipidomics	Fatty acyl carnitines	Acylcarnitine(C9:0)	0.943088	0.680791	200912	189478	239128	168031	183682	207759	205961	131461	215746	133867	241029	225286	193754	170503	202962	201698	215544	203654	0.0699776		M+H	4.92538	301.225
Lipidomics	Fatty acyl carnitines	Acylcarnitine(C9:1)	0.632243	0.159363	51423.3	32512	93622.3	34618.7	46885.2	44103.2	37886.8	19538	33734.3	39686.1	40864.2	28737.4	47006.4	54515	36444.2	36998.9	40499.9	42794.5	0.162851		M+H	4.29434	299.209
Lipidomics	Fatty acyl carnitines	Acylcarnitine(C10:0)	1.64502	0.0171767	4.53068e+06	7453072	3.38531e+06	3.75634e+06	4458744	5739132	5313873	6643517	8032637	5.30555e+06	7.19833e+06	10085329	5.93056e+06	5.95727e+06	5938617	5.63313e+06	6.15163e+06	6.00242e+06	0.0278708		M+H	5.44468	315.241
Lipidomics	Fatty acyl carnitines	Acylcarnitine(C10:1)	1.08053	0.563318	487433	526686	406827	405820	513498	552174	558848	442328	442298	738038	490690	520078	525813	482361	530164	496675	515408	492330	0.039433		M+H	4.98214	313.225
Lipidomics	Fatty acyl carnitines	Acylcarnitine(C12:0)	1.51308	0.0212815	1.21126e+07	1.83273e+07	7.67562e+06	10775934	10858190	17760492	13492788	16751871	18655102	17122060	15781964	23325514	14869769	15127779	14752777	14891728	14751307	14637885	0.0104961		M+H	6.24261	343.272
Lipidomics	Fatty acyl carnitines	Acylcarnitine(C12:1)	2.6707	0.00664081	3.04534e+06	8.1332e+06	1477040	2.51521e+06	2.82214e+06	4809118	3603197	8029421	7.45566e+06	5.97141e+06	6.84867e+06	12360855	5.43441e+06	5341033	5.39669e+06	5278547	5280797	5.27135e+06	0.0120755		M+H	5.82257	341.256
Lipidomics	Fatty acyl carnitines	Acylcarnitine(C13:0)	1.19538	0.077912	2.49954e+06	2.9879e+06	1.99831e+06	2267304	2.57904e+06	2.74594e+06	2.9071e+06	3609435	2.63649e+06	2.65755e+06	2.96078e+06	3.07524e+06	2.8105e+06	2.81807e+06	2.77901e+06	2.69124e+06	2.69322e+06	2.70202e+06	0.0199876		M+H	6.46441	357.287
Lipidomics	Fatty acyl carnitines	Acylcarnitine(C13:1)	1.61658	0.00147312	693350	1.12086e+06	535576	578060	761214	709173	882727	1.16781e+06	1.0633e+06	1.08361e+06	1.15991e+06	1.12965e+06	882045	904109	1.00162e+06	1.00158e+06	1.00474e+06	987300	0.0546632		M+H	6.20335	355.272
Lipidomics	Fatty acyl carnitines	Acylcarnitine(C14:0)	1.287	0.0950121	55208820	71053836	39345984	55775260	50960848	73236536	56725472	58233528	67648720	77995400	59426484	91965048	60962932	60757996	62300676	64407852	66285868	64551588	0.0335532		M+H	6.91871	371.303
Lipidomics	Fatty acyl carnitines	Acylcarnitine(C14:1)	2.35351	0.00240181	22192810	5.2231e+07	11673952	18386822	21108464	33546358	26248454	57379272	51673504	41649576	40690588	69762072	38306172	38494780	37974508	38425720	38701712	38338660	0.00845938		M+H	6.56987	369.288
Lipidomics	Fatty acyl carnitines	Acylcarnitine(C14:2)	1.76582	0.00763403	7874481	1.39049e+07	3.89318e+06	6707991	7.45306e+06	11435218	9882958	17089528	13329290	11084139	12595516	15426013	11684953	11471230	11473056	11844548	11685092	11650260	0.0112899		M+H	6.18635	367.272
Lipidomics	Fatty acyl carnitines	Acylcarnitine(C15:0)	1.40403	0.0155342	4.47154e+06	6.27816e+06	4.33065e+06	4.06463e+06	3.82203e+06	5450430	4689947	5142952	6.55013e+06	6.67434e+06	5300163	7723193	4745094	4990827	5.50052e+06	5.75436e+06	5.68912e+06	5447798	0.0725052		M+H	7.22318	385.319
Lipidomics	Fatty acyl carnitines	Acylcarnitine(C15:1)	1.45492	0.0408136	2.20895e+06	3.21385e+06	2.5771e+06	1.74245e+06	1.99859e+06	2.46238e+06	2.26422e+06	3187450	3112133	2.55366e+06	2.70492e+06	4.5111e+06	2.49414e+06	2.5691e+06	2564138	2651270	2.50705e+06	2.54406e+06	0.0207401		M+H	6.88666	383.303
Lipidomics	Fatty acyl carnitines	Acylcarnitine(C15:2)	0.591918	0.0723221	230987	136726	382754	168553	185120	192405	226103	110750	139247	131919	137193	164519	138134	151525	143327	123617	139640	112426	0.0967133		M+H	6.64286	381.287
Lipidomics	Fatty acyl carnitines	Acylcarnitine(C16:0)	0.815094	0.0784275	1.88293e+08	1.53477e+08	206168672	167875344	156694384	224955488	185771744	112373512	173534576	180981008	151415600	149078000	158861392	161316832	159921040	168078304	166252240	169566032	0.028912		M+H	7.52026	399.335
Lipidomics	Fatty acyl carnitines	Acylcarnitine(C16:1)	2.02343	0.00210733	6.90783e+07	1.39775e+08	47582872	63491828	63386508	95493312	75437024	149236352	140504304	121994288	107282976	179856704	104161384	106164384	106812880	109512520	108206416	111501392	0.0297167		M+H	7.13589	397.319
Lipidomics	Fatty acyl carnitines	Acylcarnitine(C16:2)	1.86403	0.00707776	1.85041e+07	3.44923e+07	13502893	15898527	14952922	27597244	20569026	41968784	27818854	29657366	29050760	43965588	25165390	25643010	25597734	27179194	27527944	27171870	0.0354256		M+H	6.78523	395.303
Lipidomics	Fatty acyl carnitines	Acylcarnitine(C17:0)	0.753727	0.0123342	1.1985e+07	9.03345e+06	14633264	10789320	10665045	11816533	12021066	6.98923e+06	9714237	10208172	9150454	9105182	10284599	10114409	10017771	10043016	9932712	10371521	0.0204085		M+H	7.77455	413.35
Lipidomics	Fatty acyl carnitines	Acylcarnitine(C17:1)	1.7465	0.000925606	3.66643e+06	6403438	3.58958e+06	2.74976e+06	3457096	4.47337e+06	4.06236e+06	6603330	7.2729e+06	5.03682e+06	5948987	7155147	4895835	5.18709e+06	4.73789e+06	4.83607e+06	4.91904e+06	4891885	0.0280689		M+H	7.41634	411.335
Lipidomics	Fatty acyl carnitines	Acylcarnitine(C17:2)	0.482093	0.151099	621494	299618	1.33786e+06	442719	542146	372870	411873	243116	319644	203581	365286	366461	443279	411881	345481	410149	369939	405654	0.0839176		M+H	7.17918	409.319
Lipidomics	Fatty acyl carnitines	Acylcarnitine(C18:0)	0.532714	0.00138816	1.82219e+08	9.70707e+07	235304960	178876096	169378704	161754832	165781360	65075316	101618560	132584160	99157512	86917776	134751024	135405040	138619808	140727376	140494800	144870528	0.0309565		M+H	8.04375	427.366
Lipidomics	Fatty acyl carnitines	Acylcarnitine(C18:1)	1.60959	5.07662e-05	2.58186e+08	4.15575e+08	259039808	233930272	230796752	291878528	275286816	442894592	435303264	381984224	375497760	442194752	322853504	345963776	347299712	346798240	342193824	353262592	0.0333216		M+H	7.66823	425.35
Lipidomics	Fatty acyl carnitines	Acylcarnitine(C18:2)	1.36274	0.00160219	1.38678e+08	188982256	132885440	131174336	117617920	164354768	147356384	205344464	172278960	198397824	171137456	197752576	155193504	165272288	162994080	165948656	164725840	166493936	0.0245058		M+H	7.34053	423.334
Lipidomics	Fatty acyl carnitines	Acylcarnitine(C18:3)	1.30587	0.100979	1.27082e+07	1.65953e+07	9186074	11875301	9961551	18903634	13614448	18183544	15207586	14113063	15405995	20066270	13926715	14504900	14870073	15083581	15178229	14925252	0.0306379		M+H	7.0507	421.319
Lipidomics	Fatty acyl carnitines	Acylcarnitine(C19:0)	0.510206	0.0580524	6.56834e+06	3.35121e+06	11349140	5721551	5.28502e+06	4285301	6200672	2.02051e+06	3.46913e+06	3.76836e+06	3.99421e+06	3.50381e+06	4.22553e+06	4423880	4.55473e+06	4.75906e+06	4.57671e+06	4630219	0.0473424		M+H	8.25887	441.381
Lipidomics	Fatty acyl carnitines	Acylcarnitine(C19:1)	1.68073	0.0043798	4.82787e+06	8114330	5.25882e+06	4371471	4.46127e+06	4327972	5.71982e+06	5.84463e+06	7.7296e+06	9423150	8333436	9240832	5.93178e+06	6398779	6541698	6.67155e+06	6307382	6669126	0.0404816		M+H	7.92509	439.365
Lipidomics	Fatty acyl carnitines	Acylcarnitine(C20:0)	0.423266	0.0457784	9.47533e+06	4.01058e+06	16985264	8.24997e+06	8649642	6293216	7198557	2.82437e+06	4309129	4523102	4.34317e+06	4.05313e+06	5.87161e+06	6.3568e+06	6326672	6475151	6295885	6590473	0.0379823		M+H	8.50255	455.397
Lipidomics	Fatty acyl carnitines	Acylcarnitine(C20:1)	1.15119	0.271371	8.46141e+07	9.74069e+07	122246816	76683432	73791240	69505544	80843632	81878216	95988904	104066944	104616056	100484304	86769880	87837808	89286120	90390504	91646232	92828480	0.0276042		M+H	8.1479	453.382
Lipidomics	Fatty acyl carnitines	Acylcarnitine(C20:2)	1.02882	0.813254	3.53176e+07	3.63354e+07	42435076	30806198	31613470	36338876	35394536	29914710	33622228	38818336	49126852	30194630	33501776	36142556	36612068	36490336	36508524	36573828	0.0337053		M+H	7.85335	451.366
Lipidomics	Fatty acyl carnitines	Acylcarnitine(C20:3)	1.03497	0.728691	7.05117e+06	7.29774e+06	8127578	6017345	6753403	7331102	7026403	6276078	7256039	9063246	8.05647e+06	5.83688e+06	6.89305e+06	7.05775e+06	7.25747e+06	6964802	7.34817e+06	6791209	0.0278363		M+H	7.58032	449.35
Lipidomics	Fatty acyl carnitines	Acylcarnitine(C20:4)	0.678317	0.0259618	3.04139e+07	2.06303e+07	41092912	28781498	29928168	24761680	27505266	15691089	18776926	27944656	22721636	18016964	23664988	24144086	24707044	26179518	25626082	25841994	0.0379895		M+H	7.38356	447.334
Lipidomics	Fatty acyl carnitines	Acylcarnitine(C20:5)	1.12198	0.552159	1.86673e+07	2.09444e+07	17971336	17953412	16185611	21250602	19975398	18319916	15231648	33134026	23533754	14502523	19325074	19140304	19180604	20510262	20894700	20371076	0.0377312		M+H	7.07119	445.319
Lipidomics	Fatty acyl carnitines	Acylcarnitine(C22:1)	0.668669	0.315798	2.29774e+06	1.53643e+06	4850523	1.96974e+06	1.88266e+06	1.10267e+06	1683123	1.02976e+06	1.43598e+06	1.76661e+06	1.93206e+06	1.51774e+06	1.71746e+06	1.69987e+06	1.78945e+06	1.84779e+06	1.87085e+06	1.88323e+06	0.0534078		M+H	8.56958	481.413
Lipidomics	Fatty acyl carnitines	Acylcarnitine(C22:2)	0.624651	0.404458	911225	569197	2.3388e+06	645168	662018	376523	533614	380378	438615	822788	763600	440606	617788	647224	719898	692709	604916	687847	0.0629911		M+H	8.30348	479.397
Lipidomics	Fatty acyl carnitines	Acylcarnitine(C22:3)	0.931711	0.78863	476891	444324	878429	434647	398394	281045	391937	289302	391173	592178	520643	428326	390539	480516	461704	399857	383347	427315	0.0890054		M+H	8.06489	477.38
Lipidomics	Fatty acyl carnitines	Acylcarnitine(C22:4)	0.443842	0.0838258	2.96044e+06	1.31397e+06	5731572	2550204	2657681	1.72128e+06	2.14146e+06	1.01496e+06	1.21389e+06	1.82807e+06	2.21632e+06	296615	2037461	2353110	2.20669e+06	2.16161e+06	2240072	2.11289e+06	0.0485128		M+H	7.80409	475.366
Lipidomics	Fatty acyl carnitines	Acylcarnitine(C22:5)	1.26562	0.503866	1.24324e+06	1.57347e+06	2.03005e+06	1036510	919638	1.02185e+06	1.20813e+06	1.38299e+06	946567	3.16924e+06	1.50087e+06	867690	1.37057e+06	1.29735e+06	1.2841e+06	1.34864e+06	1.48066e+06	1.49386e+06	0.0807657		M+H	7.54816	473.35
Lipidomics	Fatty acyl carnitines	Acylcarnitine(C22:6)	1.26838	0.445439	2.53984e+06	3.2215e+06	4.71415e+06	1.20562e+06	2.38365e+06	2.07997e+06	2.31581e+06	3110012	2.48686e+06	5.62567e+06	2.64831e+06	2236625	2893334	2.92681e+06	2898478	2871037	2.84415e+06	2923569	0.0109627		M+H	7.37668	471.335
Lipidomics	Fatty acyl carnitines	Acylcarnitine(C24:1)	0.672142	0.176342	2.78835e+06	1.87417e+06	4772149	2282822	1616498	2131173	3.1391e+06	1.43672e+06	1.74157e+06	2205520	2.15238e+06	1.83465e+06	2.29277e+06	2115002	2.23069e+06	2.40547e+06	2.13846e+06	2255614	0.0444571		M+H	8.96084	509.444
Lipidomics	Fatty acyl carnitines	Acylcarnitine(C24:2)	0.94768	0.891022	91904.1	87095.7	146259	85008.2	81835.3	53093.7	93324.1	0	72229.9	188039	86820.8	88388.1	73731.2	61256.1	98935.8	86195.9	80227.4	110971	0.19763		M+H	8.70615	507.428
Lipidomics	Fatty acyl carnitines	Acylcarnitine(C26:1)	0.82917	0.289644	278283	230744	319898	299759	211861	300032	259867	167222	253506	154598	356346	222049	192920	308174	336432	306119	218316	284409	0.192527		M+H	9.32258	537.475
Lipidomics	Fatty acyl carnitines (OH)	Acylcarnitine(C8:0-OH)	1.2954	0.252497	506348	655925	180697	435380	553902	705160	656601	455083	860068	502829	742709	718935	590529	578779	573280	622715	572301	560718	0.0351343		M+H	3.30063	303.205
Lipidomics	Fatty acyl carnitines (OH)	Acylcarnitine(C10:0-OH)	1.2322	0.335625	880061	1.08441e+06	428702	575150	914867	1.42259e+06	1.05899e+06	1.02228e+06	1.34012e+06	860600	1.03402e+06	1165046	1.01061e+06	963146	964484	979780	981619	955945	0.0354766		M+H	4.67949	331.236
Lipidomics	Fatty acyl carnitines (OH)	Acylcarnitine(C10:1-OH)	0.646034	0.134313	124844	80653.4	84866.3	100679	140548	143900	154226	84949.7	80192.4	106830	131295	0	131617	126148	124918	112812	134640	97967.5	0.12751		M+H	3.88415	329.22
Lipidomics	Fatty acyl carnitines (OH)	Acylcarnitine(C12:0-OH)	1.34654	0.133615	1.55365e+06	2.09205e+06	1.09935e+06	1.16815e+06	1.49811e+06	2.3259e+06	1676718	1.74065e+06	2537480	1.55838e+06	1.86155e+06	2.7622e+06	1.83195e+06	1.83027e+06	1.72309e+06	1.75941e+06	1.77178e+06	1.75173e+06	0.0239879		M+H	5.72039	359.267
Lipidomics	Fatty acyl carnitines (OH)	Acylcarnitine(C12:1-OH)	1.28505	0.225378	335629	431299	283670	199190	349883	427758	417644	325970	631013	322086	389870	487557	388950	390041	401527	432194	400774	396574	0.0375353		M+H	5.23609	357.251
Lipidomics	Fatty acyl carnitines (OH)	Acylcarnitine(C14:0-OH)	1.20694	0.26275	3.34757e+06	4.04031e+06	2574737	2.56632e+06	3.22644e+06	4708846	3.6615e+06	3091323	4.81936e+06	3.4732e+06	3.59117e+06	5.22651e+06	3.62966e+06	3.63471e+06	3.64006e+06	3.56364e+06	3.54971e+06	3563077	0.0117133		M+H	6.45665	387.298
Lipidomics	Fatty acyl carnitines (OH)	Acylcarnitine(C14:1-OH)	1.95496	0.0366065	2.83747e+06	5.54716e+06	2.11256e+06	2340786	2.5802e+06	4.06654e+06	3.08728e+06	4209158	7722181	3871914	4.14823e+06	7784303	4067605	3.98227e+06	4.13087e+06	4047166	4.0126e+06	4.02622e+06	0.0117719		M+H	6.14777	385.282
Lipidomics	Fatty acyl carnitines (OH)	Acylcarnitine(C14:2-OH)	1.21266	0.152338	1.44036e+06	1.74667e+06	1185792	1.1488e+06	1.38997e+06	1.85791e+06	1.61932e+06	1335261	2191505	1.79356e+06	1.61076e+06	1.80224e+06	1.53762e+06	1.45456e+06	1.55008e+06	1.58718e+06	1.6127e+06	1.65042e+06	0.039818		M+H	5.75395	383.267
Lipidomics	Fatty acyl carnitines (OH)	Acylcarnitine(C16:0-OH)	0.697952	0.0136452	11324442	7.90391e+06	10372376	9255749	11683555	13710080	11600450	5172885	8600308	10034468	7.89017e+06	7.82173e+06	9211659	9224966	8903449	8893166	8873422	9137728	0.0169775		M+H	7.10291	415.329
Lipidomics	Fatty acyl carnitines (OH)	Acylcarnitine(C16:1-OH)	2.12455	0.00600675	6.34869e+06	13488137	4.84258e+06	4332379	6.14708e+06	9611267	6.81016e+06	12690528	14775406	10439376	10757501	18777874	9735978	9652059	9669531	9708604	9946647	10023282	0.0154002		M+H	6.73259	413.313
Lipidomics	Fatty acyl carnitines (OH)	Acylcarnitine(C16:2-OH)	1.4389	0.0609622	2.7799e+06	3.99998e+06	2.09686e+06	2.24562e+06	2627476	3.8219e+06	3.10764e+06	3.43435e+06	4585208	2.95001e+06	3.57545e+06	5.45489e+06	3.35058e+06	3391362	3296042	3181119	3.24007e+06	3344175	0.0222814		M+H	6.38919	411.298
Lipidomics	Fatty acyl carnitines (OH)	Acylcarnitine(C18:0-OH)	0.327714	0.006868	2.37815e+06	779352	3.71518e+06	1.90104e+06	2304309	2.05584e+06	1.91438e+06	397619	920143	708752	1.16428e+06	705972	1.20689e+06	1.40504e+06	1.42915e+06	1.1944e+06	1.39145e+06	1.47162e+06	0.0831934		M+H	7.65867	443.36
Lipidomics	Fatty acyl carnitines (OH)	Acylcarnitine(C18:1-OH)	1.54654	0.000222726	2.28427e+07	35327254	21116900	18293164	23519126	26088640	25195788	33800016	39037292	31492798	34571044	37735120	28648950	29400732	29048828	30088618	29707976	29546156	0.0208828		M+H	7.30508	441.345
Lipidomics	Fatty acyl carnitines (OH)	Acylcarnitine(C18:2-OH)	1.3747	0.00454316	12564787	1.72728e+07	12106685	10011152	11747616	15036545	13921937	17284802	16943442	16636759	17516974	17982042	14159587	14520010	14916517	15048036	14782884	14972533	0.0217771		M+H	6.96607	439.329
Lipidomics	Fatty acyl carnitines (OH)	Acylcarnitine(C18:3-OH)	1.21893	0.302628	660737	805395	620772	546686	519990	967687	648552	772489	979025	553241	624319	1.0979e+06	739993	726054	757747	691272	697395	746131	0.0393457		M+H	6.74556	437.314
Lipidomics	Fatty acyl carnitines (OH)	Acylcarnitine(C19:0-OH)	0.225752	0.0104031	161817	36530.6	281775	122906	142405	138725	123276	107.063	64448.8	26701.4	91395.9	0	76557.2	67837.9	78078	72124.1	59897.7	59272.4	0.179015		M+H	7.92034	457.375
Lipidomics	Fatty acyl carnitines (OH)	Acylcarnitine(C20:0-OH)	0.121271	0.0414115	725898	88030.3	1.58725e+06	563428	532498	398839	547482	0	167241	0	178653	94258.1	325575	316451	344468	333124	399798	370754	0.0823131		M+H	8.18605	471.392
Lipidomics	Fatty acyl carnitines (OH)	Acylcarnitine(C20:1-OH)	0.998748	0.994309	5.70327e+06	5.69613e+06	8408090	4406213	5198716	5075295	5428018	4870801	7456108	3.98073e+06	7103689	5.06932e+06	5.14538e+06	5634189	5642265	5.66131e+06	5588228	5885985	0.0442385		M+H	7.82794	469.376
Lipidomics	Fatty acyl carnitines (OH)	Acylcarnitine(C20:2-OH)	1.12027	0.413849	2.66092e+06	2.98094e+06	3.21556e+06	1.67446e+06	2.51042e+06	2.91903e+06	2.98511e+06	2832998	3.58665e+06	2.50706e+06	3.56667e+06	2411321	2573251	2.80992e+06	2.66856e+06	2830806	2791916	2.75261e+06	0.0378163		M+H	7.49433	467.36
Lipidomics	Fatty acyl carnitines (OH)	Acylcarnitine(C20:4-OH)	0.600601	0.0617706	358186	215127	570804	305591	368589	255968	289979	145690	253985	238849	208788	228322	288473	291692	275847	262151	311043	272490	0.05666		M+H	7.06393	463.329
Lipidomics	Fatty acyl carnitines (OH)	Acylcarnitine(C20:5-OH)	0.771341	0.126974	362980	279982	420335	340427	309391	389809	354939	191623	288357	397330	342436	180163	296531	317865	289223	303376	318716	272895	0.0741657		M+H	6.73828	461.314
Lipidomics	Fatty acyl CoAs	AcylCoA(C4:0)	0.691282	0.016384	153752	106286	126245	167242	129879	194934	150462	116319	107598	89284.7	101635	116594	75665.2	90387.9	126278	107790	106740	100731	0.178045		M+H	2.92419	837.154
Lipidomics	Fatty acyl CoAs	AcylCoA(C5:0)	0.398293	0.000214554	254861	101509	219613	315805	221258	242298	275331	93934.2	75244.6	141227	117982	79159.4	137846	154295	161076	149873	170966	183381	0.101632		M+H	3.17475	851.171
Lipidomics	Fatty acyl CoAs	AcylCoA(C10:0)	0.875017	0.570044	310020	271273	166776	248000	343927	406309	385087	213307	358967	171385	202248	410456	290232	335313	152644	214890	279688	336808	0.256555		M+H	5.89542	921.248
Lipidomics	Fatty acyl CoAs	AcylCoA(C12:0)	0.713792	0.178988	245972	175573	114483	203546	262055	325799	323975	128115	251294	128249	155554	214651	161427	238722	143351	196509	212664	196818	0.169467		M+H	6.42458	949.279
Lipidomics	Fatty acyl CoAs	AcylCoA(C12:1)	0.945653	0.781028	103999	98346.6	60460.2	91832.2	168099	102513	97088.5	103612	96889.8	109894	67995.7	113341	97785.8	48090.8	109049	122104	66328.1	109510	0.29067		M+H	6.28318	947.264
Lipidomics	Fatty acyl CoAs	AcylCoA(C14:0)	1.22932	0.540411	95358	117225	39249.9	127964	72132.1	159754	77690.2	79087.2	166829	194036	59330.7	86843.7	81853.5	85091.1	157822	82159	113145	100025	0.259973		M+H	7.08117	977.312
Lipidomics	Fatty acyl CoAs	AcylCoA(C14:1)	1.3169	0.231242	810181	1.06693e+06	502472	617891	803778	1.07732e+06	1.04944e+06	1.1745e+06	1257229	592145	821719	1.48905e+06	603505	670316	894377	912753	1.27179e+06	845865	0.291332		M+H	6.55035	975.297
Lipidomics	Fatty acyl CoAs	AcylCoA(C16:0)	0.530198	0.024101	1.85703e+06	984596	1.04502e+06	1.95257e+06	1.55188e+06	2216555	2.51913e+06	989772	1.3407e+06	738391	919239	934882	978400	1.02556e+06	1.15495e+06	1322437	1.43383e+06	1.69107e+06	0.227075		M+H	7.26143	1005.34
Lipidomics	Fatty acyl CoAs	AcylCoA(C18:1)	1.12705	0.543279	4.23399e+06	4.77192e+06	3.00911e+06	4183548	3621691	5037444	5318170	5960450	6.68422e+06	2.61674e+06	3967697	4630503	2.49258e+06	3463531	4.35462e+06	4108945	4.7067e+06	5017059	0.23818		M+H	7.31787	1031.36
Lipidomics	Fatty acyl CoAs	AcylCoA(C18:2)	0.793034	0.155343	2.76414e+06	2.19205e+06	2.22822e+06	2427139	2231636	3.47828e+06	3.45541e+06	2.67906e+06	2.73262e+06	1647692	1.91336e+06	1.98755e+06	1.32632e+06	1.82667e+06	2.09041e+06	2.3514e+06	2.8768e+06	2.91231e+06	0.265015		M+H	7.08753	1029.34
Lipidomics	Fatty acyl CoAs	AcylCoA(C20:4)	0.924158	0.727453	455470	420927	218236	562860	527595	437766	530894	321624	687516	428430	395245	271818	329080	287078	418918	621446	535672	458514	0.277119		M+H	7.34115	1053.34
Lipidomics	Fatty acyl CoAs	AcylCoA(C20:5)	0.934719	0.601598	380842	355980	244608	417393	378700	453512	409997	283891	456407	352376	341933	345294	202983	305353	464367	451998	328969	335393	0.279653		M+H	7.02185	1051.33
Lipidomics	Fatty acyl CoAs	AcylCoA(C22:6)	0.727882	0.169498	157841	114889	167724	114740	161230	125207	220303	173565	123727	45045.4	135873	96237.3	97494.6	89165	120097	102300	112001	127896	0.153327		M+H	7.01459	1077.34
Lipidomics	Free fatty acid	FFA(C14:0)	0.755924	0.392709	8468997	6.40192e+06	16959046	7150599	6.98394e+06	5404101	5.8473e+06	5.37576e+06	7.15222e+06	6852497	6.35778e+06	6271338	8.17034e+06	8.09765e+06	8026935	8119434	7913555	8.01377e+06	0.0106015		M-H	7.85113	228.209
Lipidomics	Free fatty acid	FFA(C14:1)	1.00401	0.988875	2.70398e+06	2.71481e+06	5.39704e+06	2.61386e+06	2.23385e+06	1.72966e+06	1.54549e+06	2.26601e+06	3.58073e+06	2.36183e+06	2518175	2.84731e+06	2.76663e+06	2812261	2.63554e+06	2.78159e+06	2.80482e+06	2.57335e+06	0.0435648		M-H	7.52708	226.194
Lipidomics	Free fatty acid	FFA(C14:2)	0.745335	0.42762	1.36184e+06	1.01503e+06	2.89608e+06	1.24375e+06	975220	897630	796524	804874	1.15971e+06	997491	1.02943e+06	1083631	1.24347e+06	1.22883e+06	1.29773e+06	1.2537e+06	1.23308e+06	1181277	0.0313691		M-H	7.16189	224.178
Lipidomics	Free fatty acid	FFA(C16:0)	0.973323	0.933277	1.23998e+08	1.2069e+08	269171360	94567296	102168064	73082976	81000568	104150560	124211192	144257712	112258416	118572944	128171880	133947344	131112216	130484688	128419072	127975232	0.0163238		M-H	8.35906	256.24
Lipidomics	Free fatty acid	FFA(C16:1)	0.875086	0.758317	23064225	20183170	57042796	15486812	18034750	12839194	11917573	15331164	27040620	17925352	18183604	22435110	23540764	23631556	23214942	23439940	23155932	23678512	0.0142215		M-H	8.0073	254.225
Lipidomics	Free fatty acid	FFA(C16:2)	0.33104	0.297818	4.83015e+06	1.59897e+06	15554578	2735228	2.83534e+06	1.47846e+06	1.54714e+06	1.12964e+06	2.62059e+06	1.13121e+06	1.65313e+06	1.46028e+06	3.2518e+06	3320629	3.16343e+06	3.38489e+06	3.2602e+06	3.28021e+06	0.0230434		M-H	7.69674	252.209
Lipidomics	Free fatty acid	FFA(C17:0)	0.859095	0.652136	4.59372e+06	3.94644e+06	9779051	3.82591e+06	3.433e+06	2767516	3.16312e+06	3.51335e+06	4.01154e+06	5.05859e+06	3.57896e+06	3.56977e+06	4406494	4415109	4.33674e+06	4394631	4351081	4.44833e+06	0.010983		M-H	8.57448	270.256
Lipidomics	Free fatty acid	FFA(C17:1)	0.876319	0.796763	2.25133e+06	1.97288e+06	6194381	1.459e+06	1499705	1.02826e+06	1.07531e+06	1.51029e+06	2.86061e+06	1.75237e+06	1.70174e+06	2.03941e+06	2265843	2.22818e+06	2.15305e+06	2.25167e+06	2.23468e+06	2.16579e+06	0.0238903		M-H	8.25087	268.24
Lipidomics	Free fatty acid	FFA(C18:0)	0.93051	0.644012	72002692	66999200	104743216	77852816	61207984	56879460	59329984	59548168	69882240	85752024	60350652	59462916	75381424	79167480	75217872	73130608	75423856	80042136	0.0317569		M-H	8.79841	284.272
Lipidomics	Free fatty acid	FFA(C18:1)	0.822002	0.678177	1.11203e+08	9.14088e+07	283086784	79798992	78008528	57304452	57814092	67757640	132511376	90391776	73295056	93088096	115513608	112126768	104814136	102011096	102731608	103032632	0.0538072		M-H	8.47884	282.256
Lipidomics	Free fatty acid	FFA(C18:2)	0.628939	0.324648	1.45041e+08	9.12222e+07	333065344	112308760	115841928	85924888	78066504	69696456	124001000	85101368	88265560	89046832	132485768	129299264	131020488	130592032	129567992	131046768	0.00867843		M-H	8.19165	280.241
Lipidomics	Free fatty acid	FFA(C18:3)	0.407812	0.21001	1.79899e+07	7.33652e+06	46205796	13039110	13046478	9604368	8.05387e+06	5196815	10801920	5.30014e+06	7545650	7.83805e+06	14059741	14048320	13737306	13751641	13664555	13710448	0.0235548		M-H	7.92206	278.225
Lipidomics	Free fatty acid	FFA(C20:0)	0.481625	0.131971	1.34216e+06	646417	2348754	2.03633e+06	769043	456886	1.09978e+06	378900	1.04494e+06	800175	559226	448850	625553	790263	822515	1.03438e+06	1.05329e+06	876497	0.181963		M-H	9.17683	312.303
Lipidomics	Free fatty acid	FFA(C20:1)	0.614091	0.405864	1.18364e+07	7.26862e+06	30898790	9948414	7.41154e+06	4.84466e+06	6.07854e+06	4.00475e+06	10478594	9374302	6.4663e+06	6.01916e+06	10611330	10736693	10363190	10219873	10244067	10379315	0.0181393		M-H	8.87148	310.287
Lipidomics	Free fatty acid	FFA(C20:2)	0.672895	0.540017	4.21269e+06	2.8347e+06	12212956	2.69864e+06	2638002	1.685e+06	1.82888e+06	1.6521e+06	4056530	4.2389e+06	2.12432e+06	2.10166e+06	3.83034e+06	3.87778e+06	3.8181e+06	3.57996e+06	3.50518e+06	3.59238e+06	0.0415947		M-H	8.62058	308.272
Lipidomics	Free fatty acid	FFA(C20:3)	0.695966	0.513772	7.07722e+06	4.9255e+06	18563872	5090910	4.87677e+06	3490693	3.36384e+06	3.05685e+06	8410660	5804302	3.20638e+06	4.14931e+06	6228053	6493179	6.24943e+06	6.17985e+06	6.04585e+06	6114085	0.0229888		M-H	8.36878	306.255
Lipidomics	Free fatty acid	FFA(C20:4)	0.746844	0.444886	4.1117e+07	3.0708e+07	87222144	36191520	35627740	24203642	22339982	20901834	38475740	41876988	25092366	27192954	38978756	37701696	38011604	37859236	37386352	37834876	0.0138706		M-H	8.17602	304.24
Lipidomics	Free fatty acid	FFA(C20:5)	0.612505	0.347203	3.64268e+07	2.23116e+07	88844672	25260496	27827608	21293968	18907132	16012750	27612866	24454764	21896574	21580930	32404392	32289160	31887400	31754802	31728316	32000872	0.0231433		M-H	7.91961	302.225
Lipidomics	Free fatty acid	FFA(C22:0)	0.444929	0.0343242	3.19451e+06	1.42133e+06	5.09572e+06	3.26073e+06	2.80604e+06	2198359	2611713	600643	1245886	3.19834e+06	1.48467e+06	577111	1.9547e+06	1.97583e+06	2550439	2.0038e+06	2.20161e+06	2.16272e+06	0.0957652		M-H	9.52572	340.334
Lipidomics	Free fatty acid	FFA(C22:1)	0.598783	0.535126	334608	200358	1.03487e+06	377523	0	0	260650	153113	394683	299645	0	154348	184843	243493	236143	190697	246267	400900	0.290163		M-H	9.23714	338.318
Lipidomics	Free fatty acid	FFA(C22:3)	0.984075	0.979089	181040	178157	544180	85792.3	94355.6	85259.4	95610.1	76906.4	371324	224451	104275	113827	201098	185258	213945	218577	192466	210177	0.0640575		M-H	8.77732	334.287
Lipidomics	Free fatty acid	FFA(C22:4)	0.881349	0.824244	1.95768e+06	1.7254e+06	5586542	899170	1.41128e+06	1.05691e+06	834490	915825	2521934	2.86411e+06	1.10458e+06	1.22054e+06	1.90883e+06	1.79956e+06	1.86117e+06	1.83783e+06	1.93073e+06	1.85174e+06	0.0251935		M-H	8.54542	332.271
Lipidomics	Free fatty acid	FFA(C22:5)	0.725646	0.533724	2.00962e+07	1.45827e+07	51203452	12269820	15345334	11985573	9676875	7.37852e+06	19855852	20953778	12313284	12412217	18679250	18408984	18125984	18226062	18221442	17912994	0.0191313		M-H	8.32295	330.256
Lipidomics	Free fatty acid	FFA(C22:6)	0.652253	0.244959	8.80301e+07	5.74179e+07	174578736	81428232	71466000	58215552	54461952	39228736	69639264	71709328	55471712	51040428	82541080	76228584	81311656	78654976	82323544	77339264	0.0402017		M-H	8.13054	328.24
Lipidomics	Free fatty acid	FFA(C24:0)	0.591404	0.271367	560784	331650	1.08887e+06	675391	347559	180475	511627	0	642175	520611	272530	222934	338390	422416	460669	430920	498956	456466	0.12995		M-H	9.82891	368.365
Lipidomics	Free fatty acid	FFA(C24:1)	0.689723	0.366214	1.43827e+07	9.92008e+06	24476460	17182896	10638616	7.59468e+06	12020891	3.69949e+06	6968020	23334146	11008428	4590338	11257604	11496152	10601412	10848737	11329712	11534795	0.037673		M-H	9.55314	366.35
Lipidomics	Free fatty acid	FFA(C24:4)	1.72748	0.376364	85523.1	147740	252157	28445.3	61605.7	40255.6	45151.8	84274.5	230694	288072	0	135658	125690	99635.9	101932	151224	86226.1	112881	0.210963		M-H	8.90119	360.302
Lipidomics	Free fatty acid	FFA(C24:5)	1.41685	0.417918	646584	916115	1556783	291447	629294	569257	186141	731101	1.18949e+06	1.56396e+06	469433	626595	813275	851873	795746	836310	793777	841142	0.028489		M-H	8.6944	358.287
Lipidomics	Free fatty acid	FFA(C24:6)	0.929173	0.884323	709350	659109	1.86664e+06	410437	596884	393672	279119	286417	1.08982e+06	942156	523612	453538	577762	727661	682251	648236	705560	697387	0.0731653		M-H	8.50369	356.271
Lipidomics	GA1 Ganglioside	GA1(16:0)	1.45	0.248676	1.17614e+07	1.70539e+07	17244108	2.79184e+06	12850958	11928180	13991774	10723798	26475128	24095324	14093584	9881827	15181676	14585597	15640708	12092434	15054377	15344654	0.0810348		M+Na	9.54372	1226.75
Lipidomics	GD1 Ganglioside	GD1(16:0)	4.42827	0.0251922	1.34093e+06	5.93797e+06	1.35848e+06	1.04821e+06	1.19398e+06	1.49187e+06	1.61209e+06	5.36121e+06	8490068	9506523	3.06374e+06	3268337	3.57574e+06	3.65372e+06	3.83962e+06	4310993	3.4423e+06	3.47882e+06	0.0879926		(M-2H)/2	8.38082	1808.94
Lipidomics	GD1 Ganglioside	GD1(17:0)	7.55048	0.0747345	29962.9	226235	24111.5	24257	0	17878.4	83567.9	139859	498894	330723	68576.7	93120.2	94543.2	48727.1	70598.1	113269	92996.4	64250.1	0.283028		(M-2H)/2	8.50093	1822.96
Lipidomics	GD1 Ganglioside	GD1(18:0)	2.36504	0.0118373	204520	483697	264310	190753	180144	31676.9	355715	420094	714562	536904	412767	334159	492826	467100	248595	548022	403172	340142	0.272335		(M-2H)/2	8.59666	1836.97
Lipidomics	GD1 Ganglioside	GD1(19:0)	3.32845	0.154186	25799.6	85872.6	23372.4	43976.3	47841.1	13808	0	46930.5	198850	125249	8159.16	50174.2	38241.8	49256.5	40812.4	46358.7	46929.9	60769.8	0.195143		(M-2H)/2	8.7569	1850.98
Lipidomics	GD1 Ganglioside	GD1(20:0)	1.15369	0.436279	981087	1.13187e+06	961497	639126	1.21045e+06	787753	1.30661e+06	1.01138e+06	1.52951e+06	1.36388e+06	816146	938446	1099841	1.32192e+06	1.23538e+06	952775	1.25346e+06	963241	0.13241		(M-2H)/2	8.86069	1865
Lipidomics	GD1 Ganglioside	GD1(24:2)	3.77315	0.0360567	568050	2.14334e+06	478027	625638	422897	570812	742876	1.63681e+06	3.43736e+06	3.30705e+06	1107206	1.22828e+06	1520302	1373403	960772	874934	1.39296e+06	966461	0.241761		(M-2H)/2	8.93711	1917.03
Lipidomics	GD1-NeuGc Ganglioside	GD1-NeuGc(16:0)	3.5433	0.00634837	1.80482e+06	6.39501e+06	1.05051e+06	871042	2.3511e+06	2.47085e+06	2.28058e+06	4.72514e+06	9064311	7.3757e+06	3.72945e+06	7.08044e+06	4.66564e+06	4.17342e+06	3827716	4.49695e+06	4.38064e+06	3.94542e+06	0.0727138		(M-2H)/2	8.40698	1840.93
Lipidomics	GD1-NeuGc Ganglioside	GD1-NeuGc(18:0)	1.7856	0.190188	376698	672632	470326	391649	414234	254798	352484	537151	1364318	272388	472419	716886	758637	622426	561074	699758	622808	483773	0.149817		(M-2H)/2	8.6384	1868.96
Lipidomics	GD1-NeuGc Ganglioside	GD1-NeuGc(22:0)	0.81154	0.585116	1.07428e+06	871817	24278.6	784643	1.66199e+06	1692641	1.20782e+06	607574	1.18671e+06	577178	640199	1347424	1.66212e+06	1.31097e+06	1.4737e+06	1145205	1.17843e+06	1.3757e+06	0.137116		(M-2H)/2	9.00649	1925.02
Lipidomics	Glc/Gal-ceramide	Hex-Cer(16:0)	2.37688	0.147802	1.42377e+07	33841296	17236800	11128641	14264137	13189247	15369701	19598690	34646324	76008752	19955552	18997162	22102552	24920480	23250112	22728708	24354694	23378508	0.0450638		M+Acid	9.80598	699.563
Lipidomics	Glc/Gal-ceramide	Hex-Cer(20:0)	2.06358	0.0214504	3.21121e+06	6.62657e+06	2.24503e+06	2847329	3.72836e+06	3325694	3.90962e+06	3.87872e+06	7.93878e+06	9516083	5.69738e+06	6101876	4278445	4.62487e+06	4955251	4.40347e+06	3.2354e+06	4.60056e+06	0.133013		M+Acid	10.2876	755.625
Lipidomics	Glc/Gal-ceramide	Hex-Cer(21:0)	1.70305	0.0184166	3.15431e+06	5.37195e+06	3.18696e+06	3.54143e+06	3.31949e+06	2.12935e+06	3.59433e+06	3.82186e+06	4819857	7.56152e+06	5340880	5315649	4663406	3763850	4684681	4123438	4399533	4435852	0.0982445		M+Acid	10.3927	769.641
Lipidomics	Glc/Gal-ceramide	Hex-Cer(22:0)	1.23342	0.0900205	2.23979e+08	2.7626e+08	217411696	215935872	242113424	219770624	224663152	211637472	267509824	355267008	290492960	256393440	251604384	248743792	254358720	239796288	242115440	241027824	0.0226808		M+Acid	10.4788	783.657
Lipidomics	Glc/Gal-ceramide	Hex-Cer(22:1)	2.88187	0.00211148	1.85511e+06	5.3462e+06	1.76745e+06	1571965	2.10572e+06	1.79893e+06	2.03149e+06	3.35748e+06	5.71157e+06	5.46972e+06	5.84244e+06	6.34977e+06	3.04689e+06	3388942	3452595	3.93445e+06	3.37908e+06	3.21504e+06	0.0812285		M+Acid	10.3288	781.641
Lipidomics	Glc/Gal-ceramide	Hex-Cer(23:0)	1.94454	0.0106302	1.15194e+08	2.24e+08	118912120	111580264	118376496	105093344	122009432	185445840	188980688	317673920	223297744	204601520	156345984	159450000	159268864	155148752	161625776	157794192	0.0184889		M+Acid	10.5704	797.673
Lipidomics	Glc/Gal-ceramide	Hex-Cer(23:1)	2.19128	0.0278089	3.72021e+06	8.15205e+06	4.1299e+06	3.44512e+06	3781931	3271548	3972568	6133866	6.84208e+06	13349889	7.61458e+06	6819808	5998582	6501525	6.0448e+06	6.21075e+06	6.78419e+06	5.514e+06	0.0699646		M+Acid	10.4095	795.657
Lipidomics	Glc/Gal-ceramide	Hex-Cer(24:0)	2.01702	0.00790237	1.79117e+08	3.61282e+08	190657648	169381152	177408320	186474672	171663184	295113344	312986656	504171904	362115712	332022272	252401312	255167536	252269072	252476512	247176784	251354240	0.0173994		M+Acid	10.6641	811.688
Lipidomics	Glc/Gal-ceramide	Hex-Cer(24:1)	2.32995	0.0431854	233493056	5.44027e+08	242561184	200536928	243335760	229217696	251813712	397105280	512247808	960341630	463257984	387181472	384036864	380067808	398908416	380790464	385047456	384061152	0.0176591		M+Acid	10.4999	809.673
Lipidomics	Glc/Gal-ceramide	Hex-Cer(24:2)	3.80629	0.0871504	3.96444e+06	1.50898e+07	4502396	2.26397e+06	4547726	4286540	4221582	9116958	15356788	34112608	9229157	7.63352e+06	8747445	8815857	8769453	7.99641e+06	8132872	7550213	0.0603621		M+Acid	10.3659	807.656
Lipidomics	Glc/Gal-ceramide	Hex-Cer(25:0)	2.85481	0.00748546	1.15663e+07	3.30197e+07	12190938	11012875	11412039	11342341	11873541	27711854	26038998	49672708	29107558	32567286	20503482	19994148	20544890	19159794	18570904	18384776	0.0550529		M+Acid	10.7377	825.704
Lipidomics	Glc/Gal-ceramide	Hex-Cer(25:1)	3.33679	0.0251454	2.11321e+06	7.05133e+06	2.43414e+06	2.30924e+06	1.84403e+06	1.35518e+06	2.62346e+06	5497238	6152890	12749609	5.63182e+06	5.22508e+06	4704191	4.25207e+06	4.55186e+06	4.39691e+06	4524514	4285870	0.0408099		M+Acid	10.5834	823.687
Lipidomics	Glc/Gal-ceramide	Hex-Cer(26:0)	4.14658	0.000445876	1.79069e+06	7.42524e+06	2188566	1.85186e+06	1781703	853407	2.27791e+06	6157075	6181275	9112104	6735902	8939835	6027855	5.60916e+06	4788082	4856813	4.23912e+06	5122945	0.115299		M+Acid	10.8104	839.72
Lipidomics	Glc/Gal-ceramide-OH	Hex-Cer(20:0)-OH	2.15317	0.00463784	1.37611e+06	2.963e+06	1.10678e+06	1.55455e+06	1.44076e+06	1.08448e+06	1.694e+06	3.56458e+06	3.0172e+06	3.7154e+06	2.17053e+06	2.34731e+06	1.80711e+06	1.98456e+06	2.43479e+06	2.23415e+06	2.10906e+06	2.01644e+06	0.0972667		M+Acid	10.2357	771.62
Lipidomics	Glc/Gal-ceramide-OH	Hex-Cer(22:0)-OH	0.916108	0.0633835	2.34435e+07	2.14768e+07	24753948	21893906	23035140	21960198	25574344	22178986	20006364	20582266	22426666	22189642	23405798	20826752	24991764	23059438	21903922	22582886	0.0576592		M+Acid	10.4313	799.653
Lipidomics	Glc/Gal-ceramide-OH	Hex-Cer(24:0)-OH	0.668969	0.00106748	1.35729e+07	9.07987e+06	14233977	13841352	13894362	12663721	13231245	8688920	8196810	8130384	11637924	8745304	11499616	12142850	11260386	10484785	10995214	11104442	0.0600877		M+Acid	10.6068	827.683
Lipidomics	Glc/Gal-ceramide-OH	Hex-Cer(24:1)-OH	0.721423	0.0712607	2.68115e+06	1.93424e+06	3310300	2.7509e+06	1931361	2.49937e+06	2.91382e+06	1.88116e+06	1.80081e+06	2.67585e+06	1.03115e+06	2.28225e+06	746964	1.12719e+06	1346547	1.58124e+06	1.18592e+06	813663	0.288146		M+Acid	10.4416	825.666
Lipidomics	Glc/Gal-ceramide-OH	Hex-Cer(25:0)-OH	0.857328	0.348175	1.72142e+06	1.47582e+06	2.53612e+06	1.45402e+06	1.54762e+06	1.40225e+06	1667089	1.66238e+06	1.31522e+06	1.87534e+06	1.25023e+06	1.27594e+06	1.48287e+06	1.98521e+06	1.84097e+06	1495106	2.08029e+06	1.78987e+06	0.12682		M+Acid	10.7016	841.698
Lipidomics	Glc/Gal-ceramide-OH	Hex-Cer(25:1)-OH	2.10644	0.288079	572075	1.20505e+06	503643	553572	720754	409879	672529	757936	587509	3.23863e+06	460398	980747	650034	515778	625820	638565	1.00742e+06	931491	0.245096		M+Acid	10.5459	839.682
Lipidomics	Glc/Gal-ceramide-OH	Hex-Cer(26:0)-OH	2.40542	0.0360257	884543	2.12769e+06	1.38831e+06	588998	689027	548690	1.20769e+06	3.24341e+06	1.67694e+06	907733	2.01158e+06	2.79881e+06	1.95878e+06	1.19052e+06	1.47997e+06	1.76699e+06	1.97465e+06	1.86579e+06	0.191899		M+Acid	10.7754	855.714
GC/MS	Glucose pathway	Maltose	0.906939	0.447615	40091.8	36360.8	47424	44548	44357	33773	30357	31295	32299	35822	33420	48968	8085	19354	22241	19896	23183	22104	0.255158
GC/MS	Gly/Ser/Thr pathway	Glycine	0.943186	0.682244	705673	665581	925016	617961	772261	549473	663656	462866	739465	728376	838489	558710	206901	595966	553814	575740	625546	582629	0.267929
GC/MS	Gly/Ser/Thr pathway	Serine	0.80556	0.266797	17706.2	14263.4	17056	12727	25894	15518	17336	11011	21193	12154	14923	12036	9264	17460	17004	17741	17651	18088	0.235345
GC/MS	Gly/Ser/Thr pathway	Threonine	0.85626	0.523089	75255.4	64438.2	76877	43230	123395	58324	74451	49895	94273	49507	74589	53927	35504	69181	67348	67081	72432	69209	0.227066
GC/MS	Glycolysis	Lactic acid	1.07604	0.826986	367376	395311	709013	338286	191287	223009	375284	224342	276073	537583	293695	644863	157450	509313	484500	483915	528400	523670	0.279522
GC/MS	Glycolysis	Glucose-6-phosphate	1.45232	0.186869	17065	24783.8	6716	22380	11561	21517	23151	19348	38349	26206	26459	13557	5505	11302	12288	12528	12319	11436	0.235796
GC/MS	Glycolysis	Fructose-6-phosphate	1.27464	0.480617	12391.6	15794.8	4606	15688	9744	14994	16926	16874	24523	20590	15595	1392	4553	8586	9345	9314	9861	10022	0.225523
GC/MS	Glycolysis	3-Phosphoglyceric acid	1.1485	0.0848871	789.2	906.4	761	900	756	876	653	999	832	912	805	984	389	719	774	795	620	825	0.204888
GC/MS	Glycolysis	Glucose	1.00325	0.972717	3.89121e+07	3.90385e+07	46228365	33929091	38093431	34435892	41873560	34259024	48142005	36165197	42410195	34216147	18692337	32866556	32276141	34025946	36599860	35730243	0.198612
Lipidomics	GM3 Ganglioside	GM3(16:0)	1.90067	0.108422	2.51826e+07	4.78638e+07	17430082	17836902	32226152	31243342	27176616	42771988	49285420	88549264	34274800	24437650	39868684	39102592	37087772	38131204	36350976	36979416	0.0404316		M-H	8.98557	1152.71
Lipidomics	GM3 Ganglioside	GM3(22:0)	0.652416	0.0253674	2.36966e+06	1.546e+06	2.4802e+06	2.60194e+06	2.24792e+06	2.06063e+06	2457601	1.24503e+06	1.80647e+06	2367446	1.35799e+06	953075	1.73578e+06	1959430	1.73513e+06	2.0149e+06	2.12993e+06	1782873	0.0843848		M-H	9.75059	1236.8
Lipidomics	GM3 Ganglioside	GM3(24:1)	1.43339	0.145897	4.73153e+06	6.78213e+06	6452127	3.36369e+06	4559705	4790794	4491344	6164420	8307596	10264490	4.47331e+06	4700814	6.00071e+06	6276136	5866600	5566397	5.73213e+06	6062311	0.0464168		M-H	9.74954	1262.82
Lipidomics	GM3-NeuGc Ganglioside	GM3-NeuGc(15:0)	3.84474	0.178528	76504.5	294140	0	97934.4	20587.6	0	264001	246027	196748	783784	244139	0	255681	193170	138428	169535	230039	242957	0.274989		M-H	8.87975	1154.69
Lipidomics	GM3-NeuGc Ganglioside	GM3-NeuGc(16:0)	2.05995	0.0642203	22875542	4.71224e+07	18929672	16677474	26670142	28077220	24023202	40604100	42686292	84769784	36930136	30621572	37686232	36527064	34163316	34891916	35713888	32607524	0.0491025		M-H	8.97908	1168.71
Lipidomics	GM3-NeuGc Ganglioside	GM3-NeuGc(22:0)	0.687765	0.087844	4.46791e+06	3.07287e+06	6.80201e+06	3137797	4160197	3.84316e+06	4396414	3.6483e+06	3.40528e+06	2527632	3.18199e+06	2601163	3.33905e+06	4.11946e+06	3.18405e+06	4033852	3.22609e+06	2.78886e+06	0.13865		M-H	9.71121	1252.8
Lipidomics	GM3-NeuGc Ganglioside	GM3-NeuGc(24:1)	1.34346	0.281555	4.94233e+06	6.63982e+06	7806906	3.07785e+06	4.51286e+06	4.44754e+06	4866511	6838842	7613467	10553280	4712016	3481478	6.48533e+06	5.88237e+06	5.5931e+06	5361760	5419793	6723670	0.0917619		M-H	9.73327	1278.81
Lipidomics	Hydroxy free fatty acid	FFA(C18:1-OH)	0.88382	0.70858	1.07254e+06	947929	2.17667e+06	1.17661e+06	801978	625919	581504	812964	1.02257e+06	704142	1.33795e+06	862021	1.04318e+06	1102430	1.00846e+06	953758	1229343	1.02892e+06	0.0927198		M-H	7.53131	298.25
Lipidomics	Hydroxy free fatty acid	FFA(C22:6-OH)	0.533891	0.281078	144693	77250.5	348121	99347.1	76842.8	66755	132401	22752	60659.5	124850	128090	49902	121762	122490	93110.8	120525	126012	114311	0.0946483		M-H	7.06038	344.235
Lipidomics	Lysophosphatidic acid(acyl)	LPA(a-16:0)	0.450016	7.52912e-05	2.79635e+06	1.2584e+06	2.65671e+06	3347132	2.41894e+06	2.73486e+06	2.82409e+06	998447	1.07303e+06	1.3176e+06	1.52877e+06	1374162	2004776	2.00962e+06	2110073	2.00169e+06	2.09666e+06	2074914	0.0268849		M-H	7.24795	410.243
Lipidomics	Lysophosphatidic acid(acyl)	LPA(a-16:1)	1.4793	0.18762	116154	171827	161076	5280.25	134405	156622	123389	222857	146882	104074	143709	241612	168827	153842	138596	154232	129562	150621	0.0837173		M-H	6.88389	408.226
Lipidomics	Lysophosphatidic acid(acyl)	LPA(a-18:1)	0.979585	0.826108	1.25118e+06	1.22564e+06	1.66122e+06	1.13871e+06	1.11388e+06	1156201	1.18589e+06	1331687	1294005	1220230	1164669	1.1176e+06	1.23568e+06	1.33752e+06	1.29145e+06	1.24268e+06	1.2774e+06	1.33857e+06	0.0359036		M-H	7.38059	436.258
Lipidomics	Lysophosphatidic acid(acyl)	LPA(a-20:4)	2.21861	0.106071	13541.3	30042.8	24744.6	10805.7	19533.6	7611.81	5010.77	33128.2	42995.8	40876.7	0	33213.3	30635.8	30787.1	30945.9	18902.5	34185.4	24760	0.184216		M-H	7.00866	458.242
Lipidomics	Lysophosphatidylcholine(acyl)	LPC(a-14:0)	1.48807	0.115145	1.39596e+06	2.07728e+06	1.02849e+06	2.01096e+06	1329978	1.10592e+06	1.50447e+06	1.63497e+06	1.6661e+06	3.28557e+06	1.54328e+06	2256494	1.64153e+06	1.61391e+06	1.78327e+06	1.6902e+06	1.65967e+06	1.78966e+06	0.0494592		M+H	6.99579	467.301
Lipidomics	Lysophosphatidylcholine(acyl)	LPC(a-14:0)	1.20823	0.306427	9.35102e+06	1.12982e+07	7.8486e+06	12446026	8773771	7.88337e+06	9803336	9148147	9774587	17091468	8841484	11635436	10181212	9615946	9621622	10028428	10057489	10358397	0.032669		M+H	7.12675	467.301
Lipidomics	Lysophosphatidylcholine(acyl)	LPC(a-16:0)	1.04313	0.60902	1902787122	1984845130	1724817020	2038937860	1918823680	1916054140	1915302910	1846096640	1745962620	2502342910	1759609340	2070214140	1878370820	1948672770	1862236670	1992440450	1852880130	1981978370	0.0391234		M+H	7.70767	495.331
Lipidomics	Lysophosphatidylcholine(acyl)	LPC(a-16:0)	1.14878	0.124273	470395168	5.4038e+08	397605024	534993728	471258304	471510656	476608128	506873472	474288864	656032130	490775520	573928510	482773984	498658368	519880864	503524352	533778368	513658944	0.0326715		M+H	7.58608	495.331
Lipidomics	Lysophosphatidylcholine(acyl)	LPC(a-16:1)	1.32656	0.0617088	1.52736e+07	2.02613e+07	11610675	19867112	15690815	14359571	14839708	21307148	16496026	20518956	16573234	26411124	15928568	16926690	17424768	17657364	17312322	17697324	0.0443509		M+H	7.1834	493.316
Lipidomics	Lysophosphatidylcholine(acyl)	LPC(a-16:1)	1.48682	0.0105403	7.14524e+07	106236856	57392236	93692208	71836832	65869632	68470920	108516904	90846488	118085608	84842800	128892480	83173432	84771392	86098296	88729176	88972920	89267904	0.036546		M+H	7.31761	493.316
Lipidomics	Lysophosphatidylcholine(acyl)	LPC(a-17:0)	1.82643	0.00491098	1.46572e+07	2.67705e+07	14499376	15421363	14013566	13657050	15694868	30096210	21317660	29869026	21378660	31190932	19496308	19441202	19827584	20831320	20568280	22133394	0.0607609		M+H	7.88317	509.348
Lipidomics	Lysophosphatidylcholine(acyl)	LPC(a-17:0)	1.42121	0.0280686	4.99777e+07	7.10289e+07	49176016	54123680	47911208	47261020	51416332	76088344	59300532	90963432	55509540	73282560	56692360	58993404	60944544	61844440	59554252	61623264	0.0319001		M+H	7.96736	509.347
Lipidomics	Lysophosphatidylcholine(acyl)	LPC(a-17:1)	1.69811	0.00272774	5.20049e+06	8.83099e+06	4356654	6.66368e+06	4.78102e+06	4.56207e+06	5639026	9799745	7635258	9262965	6.94918e+06	10507797	6928739	6.44503e+06	6889544	6763309	7.01698e+06	6662127	0.0291145		M+H	7.58846	507.332
Lipidomics	Lysophosphatidylcholine(acyl)	LPC(a-18:0)	1.18069	0.205391	305248896	360403680	300103168	337452064	294746208	294678368	299264672	348931296	288155840	494677088	306726784	363527392	316428544	325925504	331412416	332147776	334064672	348191456	0.0334407		M+H	8.10135	523.362
Lipidomics	Lysophosphatidylcholine(acyl)	LPC(a-18:0)	1.14632	0.265633	894884596	1025825486	921461890	935928320	874202180	881910910	860919680	944201920	861058370	1416882560	897241860	1009742720	910216450	933234560	939368830	960725820	967549180	975180420	0.0257857		M+H	8.21105	523.362
Lipidomics	Lysophosphatidylcholine(acyl)	LPC(a-18:1)	1.49512	0.00427625	1.34427e+08	2.00985e+08	117379968	161800544	133876800	129768608	129310264	218147520	191299648	225316784	153008096	217155136	163398112	163145936	160142816	164785296	157208656	173939472	0.0429449		M+H	7.7274	521.347
Lipidomics	Lysophosphatidylcholine(acyl)	LPC(a-18:1)	1.70866	0.00170925	697290164	1191429312	562865470	868337410	693549250	685175040	676523650	1274850690	1108565380	1342840320	904068670	1326821500	886364540	931507710	947403330	976607550	998174400	989465600	0.0427054		M+H	7.83798	521.347
Lipidomics	Lysophosphatidylcholine(acyl)	LPC(a-18:2)	1.0987	0.447255	1145415844	1258470438	931060220	1551427710	1084097660	1062287550	1098206080	1195520000	1097189500	1531432960	1046653250	1421556480	1091594750	1202620930	1194474880	1254422530	1274735620	1279136130	0.0634897		M+H	7.52214	519.331
Lipidomics	Lysophosphatidylcholine(acyl)	LPC(a-18:2)	0.98598	0.863661	5.25922e+08	518548814	466609728	622673280	507670880	513285952	519370368	505319424	432318944	589820930	469522912	595761860	519620640	518579136	508032128	529754976	521932608	547669500	0.0234108		M+H	7.4076	519.331
Lipidomics	Lysophosphatidylcholine(acyl)	LPC(a-18:3)	0.639178	0.0311377	8.59111e+06	5.49125e+06	5.91365e+06	11982876	8614642	7.91196e+06	8532417	5875484	4.82406e+06	3.72021e+06	6.2112e+06	6.8253e+06	6093772	6.79736e+06	7383127	7419967	7.12502e+06	7.47661e+06	0.0764246		M+H	7.13309	517.315
Lipidomics	Lysophosphatidylcholine(acyl)	LPC(a-18:3)	0.823937	0.274659	2.93524e+07	2.41845e+07	19781998	42702908	28305064	28394898	27576974	25028160	20168086	20606356	22610156	32509690	25109362	26456542	28850114	28021660	27880798	28553022	0.0546185		M+H	7.23972	517.315
Lipidomics	Lysophosphatidylcholine(acyl)	LPC(a-19:0)	1.83939	0.00429232	10610494	1.95168e+07	10374304	11673942	9972198	9614200	11417826	19682966	14448138	24150362	18001860	21300776	13708790	14661122	14494272	14729270	15143354	15531228	0.0416518		M+H	8.33086	537.378
Lipidomics	Lysophosphatidylcholine(acyl)	LPC(a-19:0)	1.46417	0.0240636	2.41042e+07	35292732	25212956	25332686	22682526	22351290	24941578	35691752	25256010	44595296	32278854	38641748	28480260	28253888	29771670	30515394	29050936	30437894	0.0333387		M+H	8.42993	537.378
Lipidomics	Lysophosphatidylcholine(acyl)	LPC(a-19:1)	1.96159	0.00600222	674394	1.32289e+06	527918	785635	658292	645133	754993	1.25858e+06	1.0516e+06	1.75999e+06	1.07206e+06	1.47219e+06	971886	923520	945496	1.04937e+06	918605	975252	0.0625932		M+H	7.97102	535.365
Lipidomics	Lysophosphatidylcholine(acyl)	LPC(a-19:1)	2.41051	0.00472105	3.29015e+06	7.93094e+06	2.79221e+06	4105784	3.20327e+06	2.72506e+06	3624428	7271913	6032190	10570888	6380149	9399551	5329309	5.52279e+06	5396612	5583396	5544806	5.74075e+06	0.0337935		M+H	8.07001	535.363
Lipidomics	Lysophosphatidylcholine(acyl)	LPC(a-20:0)	1.45245	0.00670926	5825298	8.46095e+06	4.9708e+06	6.3673e+06	5644297	6160693	5983398	9554942	6.36305e+06	8.19316e+06	9115579	9078044	6.53884e+06	7038552	6.85441e+06	7441257	7354301	7577259	0.0540354		M+H	8.54075	551.394
Lipidomics	Lysophosphatidylcholine(acyl)	LPC(a-20:0)	1.25845	0.0176917	1.97346e+07	2.48349e+07	18809140	20089514	19279184	21236178	19258770	27998996	19809718	24576528	25970170	25818952	21451494	21729660	22164538	22575522	22118828	22044928	0.0185241		M+H	8.64273	551.394
Lipidomics	Lysophosphatidylcholine(acyl)	LPC(a-20:1)	2.54061	0.000305161	1.89902e+06	4.82467e+06	1.49016e+06	2.1891e+06	1912980	1885183	2.01767e+06	5332553	4128713	5.09021e+06	4.02553e+06	5.54633e+06	2990235	2878996	3.27532e+06	3132066	3.36909e+06	3.45949e+06	0.070777		M+H	8.17611	549.378
Lipidomics	Lysophosphatidylcholine(acyl)	LPC(a-20:1)	2.3176	0.0021761	2.27047e+07	5.26206e+07	21258370	27300318	21672932	20984798	22307236	53980196	41546444	64068968	42540372	60966772	34054016	36602164	36819412	37960684	36708476	37890896	0.0419602		M+H	8.29076	549.378
Lipidomics	Lysophosphatidylcholine(acyl)	LPC(a-20:2)	2.22555	0.0228955	2.93832e+06	6.53939e+06	2.51428e+06	3297967	2.99125e+06	2.85881e+06	3.02928e+06	6808047	4718965	10078065	4.41818e+06	6.67367e+06	4.45789e+06	4.2571e+06	4194642	4388305	4308002	4.96193e+06	0.0867559		M+H	7.8973	547.362
Lipidomics	Lysophosphatidylcholine(acyl)	LPC(a-20:2)	2.73116	0.0255802	12462164	34036164	8630805	16200421	12694864	12162629	12622101	30756498	25642330	57241160	20778680	35762152	21369530	21424192	21925462	22461966	22318268	22692540	0.0299283		M+H	7.99767	547.362
Lipidomics	Lysophosphatidylcholine(acyl)	LPC(a-20:3)	1.93128	0.0090902	1.85727e+07	3.5869e+07	13800796	21587890	19130792	22199712	16144238	36648264	37855060	41931860	20551152	42358836	26178176	24716734	29120578	27364204	27574980	29836236	0.0633865		M+H	7.63656	545.347
Lipidomics	Lysophosphatidylcholine(acyl)	LPC(a-20:3)	2.58189	0.00879381	4.53701e+07	1.17141e+08	26036242	64314768	46672288	53381272	36446072	111300224	112369656	157616816	61875416	142540736	75731776	82778080	82765848	85692136	81850576	83645528	0.0401949		M+H	7.74046	545.347
Lipidomics	Lysophosphatidylcholine(acyl)	LPC(a-20:4)	1.68015	0.0164676	4.27363e+08	7.18034e+08	330292640	544908100	438271872	425957824	397383328	687289470	622356800	906311620	494060448	880152640	509403456	555767940	552538620	587232380	589907140	601651580	0.063055		M+H	7.53367	543.331
Lipidomics	Lysophosphatidylcholine(acyl)	LPC(a-20:4)	1.40812	0.0185265	1.7139e+08	2.41337e+08	142423920	173836704	184959664	183625856	172102928	241834448	208728272	285340256	188659856	282122080	204874624	206357056	198556944	201265984	200463136	208805760	0.0208033		M+H	7.42638	543.331
Lipidomics	Lysophosphatidylcholine(acyl)	LPC(a-20:5)	1.85895	0.0318569	5.80001e+07	1.07819e+08	38913888	76837280	53336152	57622672	63290592	94434464	70744256	161326832	88176544	124413296	75529384	77217032	83027440	85037408	87161016	86498680	0.0623985		M+H	7.23759	541.315
Lipidomics	Lysophosphatidylcholine(acyl)	LPC(a-20:5)	1.61115	0.0548683	1.62243e+07	2.61398e+07	11772601	19940382	14652111	15747804	19008684	23641270	16484474	39174076	23431012	27968376	20253060	19884260	19859400	20584512	20414856	21240216	0.0333556		M+H	7.12409	541.315
Lipidomics	Lysophosphatidylcholine(acyl)	LPC(a-21:0)	1.33923	0.0350229	2.16112e+06	2.89423e+06	1.64453e+06	2.434e+06	2.15527e+06	2224032	2.34777e+06	3.27542e+06	2.12626e+06	3.06454e+06	2.58619e+06	3418740	2.47574e+06	2461445	2.52973e+06	2.68182e+06	2.69567e+06	2.66085e+06	0.0474239		M+H	8.81084	565.409
[truncated: 698 more rows]

## Sheet: Muscle
	Molecule		Statistics		Mean (area)		Young					Aged					mixQC						Molecule information
[truncated: 1,104 more rows]

[truncated: 1 more sheets: Adipose]
